# Supplementary material
Source: PubMed Central journal article supplement (PMC3683774)
Supplement: 1304913110_pnas.201304913SI.pdf [file 1304913110_pnas.201304913SI.pdf]

# Supporting Information

McCain et al. 10.1073/pnas.1304913110

## SI Materials and Methods

**Cell Culture.** All animal protocols were approved by the Harvard University Animal Care and Use Committee. Ventricles from 2-d-old Sprague–Dawley rats were harvested, minced, and incubated with 1 mg/mL trypsin for 12 h at 4 °C. Single cells were isolated by incubating the tissue with 1 mg/mL collagenase (Worthington Biochemical) for 2 min at 37 °C, agitating the tissue several times with a pipette, collecting the supernatant, and repeating this process three more times until no tissue remained. To reduce nonmyocyte cell populations, cell suspensions were incubated twice in tissue culture flasks for 45 min and the supernatant was collected. Myocytes were suspended in M199 media supplemented with 10% FBS, 20 mM glucose, 2 mM L-glutamine, 1.5  $\mu$ M vitamin B12, 50 U/mL penicillin, 10 mM Hepes, and 0.1 mM MEM nonessential amino acids. Samples were seeded with  $0.67$  to  $1.0 \times 10^6$  cells. Stretched samples were seeded with a higher cell density to ensure even tissue confluence in all samples because mechanical agitation from the stretching device interfered with initial cell adhesion. Myocytes were maintained in supplemented M199 media with 10% FBS for the first 48 h and were then switched to supplemented M199 media with 2% FBS.

**Microcontact Printing.** An array of  $80 \times 12 \mu\text{m}^2$  rectangles arranged into a “brick wall” pattern with a “sawtooth” interface at their longitudinal borders was designed in AutoCAD and etched onto a photolithographic mask. Silicon wafers were spin-coated with SU-8 2002 photoresist (Microchem), aligned under the photolithographic mask, exposed to UV light for 5 s, and submerged in SU-8 developer to dissolve unmasked regions. After silanizing the wafer, polydimethylsiloxane (PDMS; Sylgard 184; Dow Corning) was poured over the wafer and allowed to polymerize at 65 °C for at least 4 h. The PDMS block was then peeled off the wafer, trimmed, and used as a stamp. Multiple stamps were fabricated from the same wafer.

Elastic silicone membranes (Specialty Manufacturing) with a thickness of 0.01 inches were clamped into stainless steel brackets, as previously described (1). A 25-mm-diameter ring of silicon tubing was affixed to the center of the membrane by using PDMS. Immediately before fibronectin (FN) application, membranes were treated in a UV-ozone cleaner (Jelight) to sterilize and activate the surface for FN binding. The PDMS stamps described earlier were coated with 50  $\mu\text{g/mL}$  FN (BD Biosciences) for 1 h, dried, and inverted onto the center of the membranes within the silicon ring. Separate membranes were coated uniformly with 50  $\mu\text{g/mL}$  FN added directly to the membrane for 20 min immediately following UV-ozone treatment.

**Gene Expression Analysis.** RNA was isolated from tissues after 6, 24, and 96 h in culture by using Stratagene Absolutely RNA Miniprep Kit (Agilent Technologies). To normalize across cell harvests, RNA was collected from myocytes cultured on substrates coated with isotropic FN for 1 h for each harvest. RNA quality was validated with a Nanodrop spectrophotometer (Thermo Scientific) and an Agilent 2100 Bioanalyzer (Agilent Technologies). mRNA was amplified and hybridized to Affymetrix GeneChip Rat

Gene 1.0 ST Arrays in accordance with the manufacturer’s instructions, and scanned with an Affymetrix GeneChip Scanner 3000 7G. Probe cell intensity data files were loaded into Affymetrix Expression Console Software and normalized by using the robust multichip average method (2). Signal values were log<sub>2</sub>-transformed and analyzed with Bioconductor open-source software and the limma package in R (3). Expression values for each condition were averaged, fit to a linear model, and compared by using Bayes statistics.

Genes were filtered to include only those which showed a statistically different expression value in any experimental condition at any time point compared with the expression value at 1 h after seeding ( $P < 0.05$ ), resulting in 19,179 genes (Tables S1–S3). Gene expression values were analyzed with the Gene Expression Dynamics Inspector bioinformatics software package (4, 5), which uses unsupervised machine learning algorithms to organize genes with highly similar behavior into clusters. Each cluster is represented by a tile and tiles are arranged into mosaics, with clusters of similar behavior located in close proximity. Each tile represents the same genes for each mosaic. The centroid of each cluster is encoded with a color, indicating up- and down-regulated genes.

To generate heat maps for specific Gene Ontology terms, genes were filtered to include only those that showed statistically different expression levels at 96 h between tissues on isotropic FN with and without stretch and/or tissues on patterned FN with and without longitudinal stretch ( $P < 0.05$ ). Differentially regulated genes were categorized by selected Gene Ontology terms by inputting filtered probe set IDs into the AmiGO! Slimmer from the Gene Ontology project (<http://amigo.geneontology.org/cgi-bin/amigo/slimmer>).

**Sarcomere Alignment.** After 4 d in culture, tissues were fixed with 4% paraformaldehyde and 0.15% Triton X-100 in PBS solution for 10 min at room temperature. Tissues were incubated with the following primary antibodies: polyclonal rabbit anti-FN (F3648; Sigma-Aldrich) and monoclonal mouse anti-sarcomeric  $\alpha$ -actinin (A7811; Sigma-Aldrich) for 80 min at room temperature. Following multiple PBS solution rinses, tissues were incubated with Alexa Fluor 488 goat anti-mouse IgG, Alexa Fluor 546 goat anti-rabbit IgG, Alexa Fluor 633 phalloidin, and DAPI (Invitrogen) for 1 h at room temperature. All antibodies and chemical stains were diluted 1:200 in PBS solution. Samples were rinsed with PBS solution, and the piece of membrane with the tissue was excised, mounted on a glass slide, coated with ProLong Gold Anti-Fade reagent (Invitrogen), covered with a glass coverslip, and sealed with nail polish. Ten images per coverslip were captured with a CCD camera (CoolSnap; Photometrics) mounted on an inverted fluorescent microscope (DMI 6000B; Leica Microsystems) using a 40 $\times$  objective lens. Custom MATLAB software (MathWorks) was used to threshold  $\alpha$ -actinin immunosignals and detect the orientation angles of continuous pixel segments (6, 7). All orientation angles from a single tissue were consolidated and used to calculate the orientational order parameter (8). Orientational order parameters from each tissue for a single condition were averaged and statistically compared by Student *t* test.

1. Zhuang J, Yamada KA, Saffitz JE, Kléber AG (2000) Pulsatile stretch remodels cell-to-cell communication in cultured myocytes. *Circ Res* 87(4):316–322.
2. Irizarry RA, et al. (2003) Summaries of Affymetrix GeneChip probe level data. *Nucleic Acids Res* 31(4):e15.
3. Smyth GK (2004) Linear models and empirical Bayes methods for assessing differential expression in microarray experiments. *Stat Appl Genet Mol Biol* 3:Article3.
4. Sheehy SP, Huang S, Parker KK (2009) Time-warped comparison of gene expression in adaptive and maladaptive cardiac hypertrophy. *Circ Cardiovasc Genet* 2(2):116–124.

5. Eichler GS, Huang S, Ingber DE (2003) Gene Expression Dynamics Inspector (GEDI): For integrative analysis of expression profiles. *Bioinformatics* 19(17):2321–2322.
6. Bray MA, Sheehy SP, Parker KK (2008) Sarcomere alignment is regulated by myocyte shape. *Cell Motil Cytoskeleton* 65(8):641–651.
7. Feinberg AW, et al. (2012) Controlling the contractile strength of engineered cardiac muscle by hierarchical tissue architecture. *Biomaterials* 33(23):5732–5741.
8. Grosberg A, Alford PW, McCain ML, Parker KK (2011) Ensembles of engineered cardiac tissues for physiological and pharmacological study: Heart on a chip. *Lab Chip* 11(24):4165–4173.

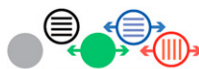

## Myofibril

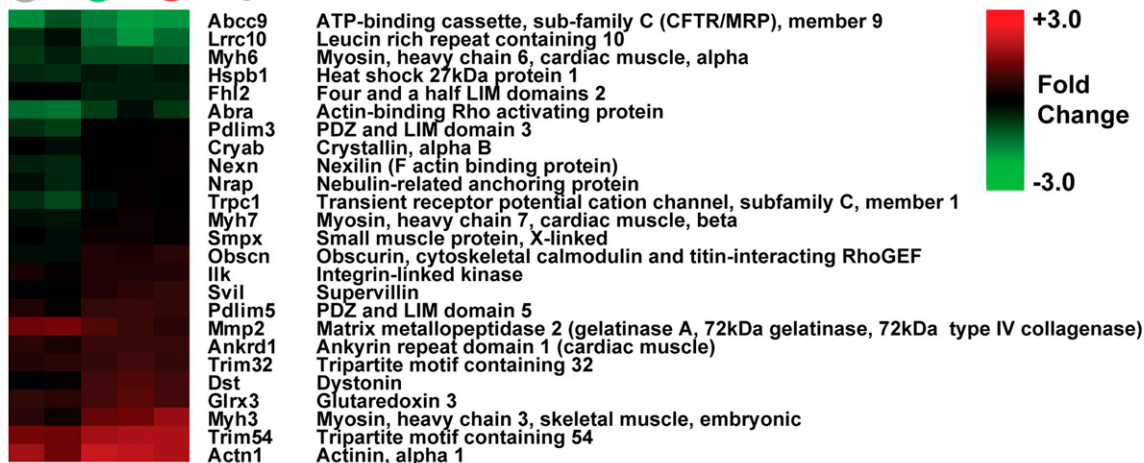

## Focal Adhesion

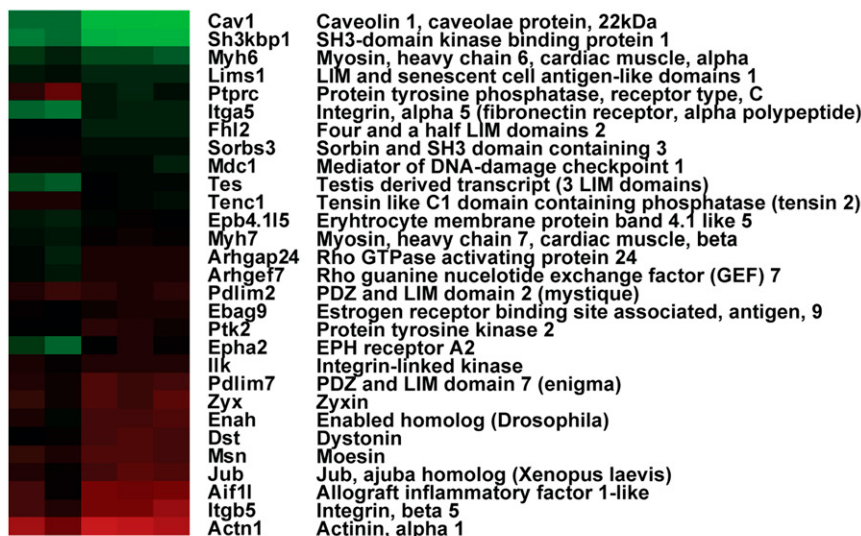

## Heart Contraction

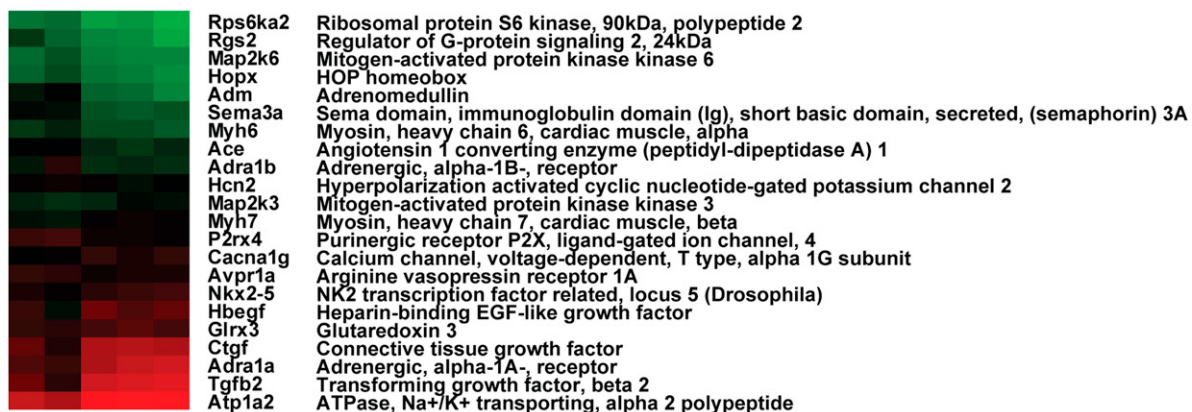

**Fig. S1.** Heat maps for Gene Ontology terms “myofibril,” “focal adhesions,” and “heart contraction.” Genes that showed a significant difference between isotropic and isotropic plus stretch and/or patterned and patterned plus longitudinal stretch are displayed. Color bar indicates fold change differences in gene expression relative to samples collected 1 h after seeding.

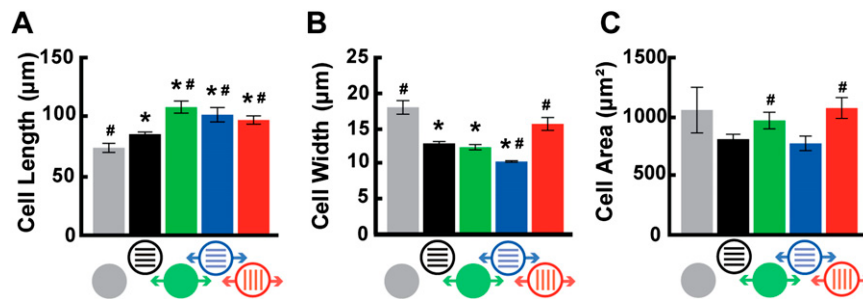

**Fig. S2.** Myocyte shape changes in conditioned tissues: (A) cell length, (B) cell width, and (C) cell area in tissues stained with di-8-ANEPPS membrane dye (mean  $\pm$  SE;  $n \geq 4$  tissues; \* $P < 0.05$  vs. static, isotropic tissues; # $P < 0.05$  vs. static, patterned tissues).

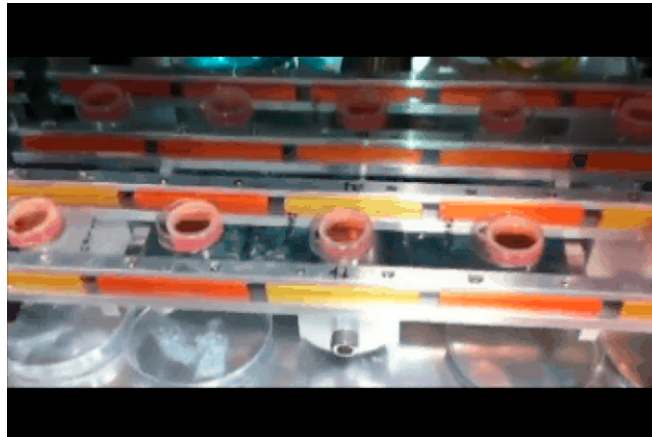

**Movie S1.** Cyclic stretch bioreactor. Movie of the custom-built bioreactor used to apply 10%, 3 Hz cyclic strain to engineered monolayers of cardiac tissue cultured on elastic silicone membranes.

[Movie S1](#)

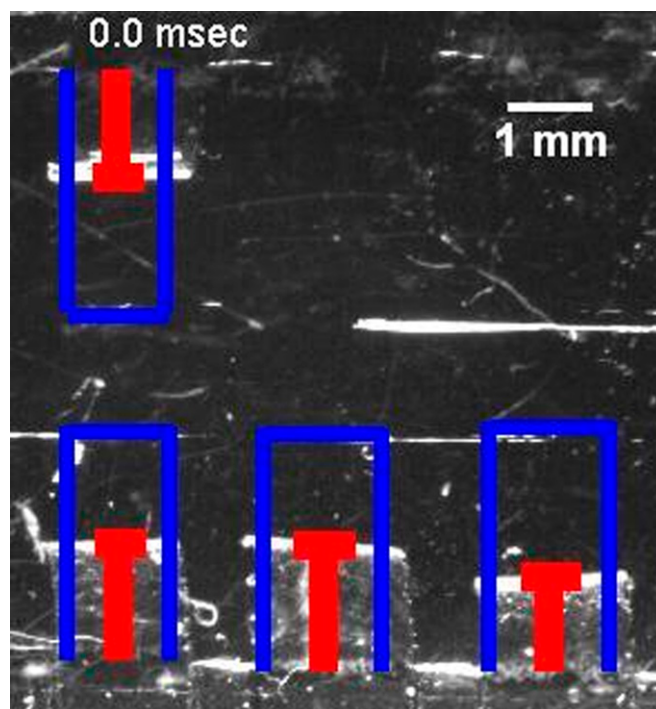

**Movie S2.** Stretchable muscular thin films. Movie of muscular thin films cultured on stretcher membranes and subsequently released to measure stress generation in engineered cardiac tissues.

[Movie S2](#)

#### **Dataset S1. Significant changes in gene expression at 6 h**

[Dataset S1](#)

Genes are listed that showed a significant change in gene expression ( $P < 0.05$ ) in patterned (P-), isotropic plus stretch (I+S), patterned plus longitudinal stretch (P+LS), and/or patterned plus transverse stretch (P+TS) relative to isotropic tissues (I-) after 1 h of static culture and 6 h with or without stretch. Log fold change (FC) of expression values and  $P$  values are listed.

#### **Dataset S2. Significant changes in gene expression at 24 h**

[Dataset S2](#)

Genes are listed that showed a significant change in gene expression ( $P < 0.05$ ) in patterned (P-), isotropic plus stretch (I+S), patterned plus longitudinal stretch (P+LS), and/or patterned plus transverse stretch (P+TS) relative to isotropic tissues (I-) after 1 h of static culture and 24 h with or without stretch. Log fold change (FC) of expression values and  $P$  values are listed.

#### **Dataset S3. Significant changes in gene expression at 96 h**

[Dataset S3](#)

Genes are listed that showed a significant change in gene expression ( $P < 0.05$ ) in patterned (P-), isotropic plus stretch (I+S), patterned plus longitudinal stretch (P+LS), and/or patterned plus transverse stretch (P+TS) relative to isotropic tissues (I-) after 1 h of static culture and 96 h with or without stretch. Log fold change (FC) of expression values and  $P$  values are listed.
