# Supplementary material
Source: PubMed Central journal article supplement (PMC3683774)
Supplement: 1304913110_sd01.pdf [file 1304913110_sd01.pdf]

**6 Hours**

| AffymetrixProbe ID | Gene Symbol | <b><u>P-</u></b> |         | <b><u>I+S</u></b> |         | <b><u>P+LS</u></b> |         | <b><u>P+TS</u></b> |         |
|--------------------|-------------|------------------|---------|-------------------|---------|--------------------|---------|--------------------|---------|
|                    |             | Log FC           | p-Value | Log FC            | p-Value | Log FC             | p-Value | Log FC             | p-Value |
| 10710993           | LOC308990   | 0.011126         | 1.0000  | 0.085601          | 1.0000  | 0.322065           | 0.0398  | 0.223625           | 0.9998  |
| 10725397           | Igsf6       | -0.017677        | 1.0000  | 0.134738          | 1.0000  | 0.717100           | 0.0225  | 0.593961           | 0.5815  |
| 10733982           | Nlrp3       | -0.002715        | 1.0000  | 0.049447          | 1.0000  | 0.541951           | 0.0133  | 0.069169           | 0.9998  |
| 10736312           | Nos2        | -0.154058        | 1.0000  | -0.041719         | 1.0000  | 1.854577           | 0.0035  | 0.682997           | 0.9998  |
| 10736863           | Ccl4        | 0.222961         | 1.0000  | 0.117937          | 1.0000  | 1.764898           | 0.0158  | 0.637809           | 0.9998  |
| 10738051           | Csf3        | 0.058759         | 1.0000  | -0.115574         | 1.0000  | 1.293002           | 0.0005  | 0.292279           | 0.9998  |
| 10739549           | Trim47l     | 0.162710         | 1.0000  | 0.070109          | 1.0000  | 0.467581           | 0.0035  | 0.223452           | 0.9998  |
| 10742663           | Csf2        | -0.088315        | 1.0000  | -0.057763         | 1.0000  | 2.443460           | 0.0000  | 0.723772           | 0.9998  |
| 10744545           | ---         | 0.314769         | 1.0000  | 0.197334          | 1.0000  | 0.737936           | 0.0123  | 0.479142           | 0.9998  |
| 10745662           | Ccl9        | 0.227884         | 1.0000  | 0.233337          | 1.0000  | 1.484548           | 0.0056  | 0.982104           | 0.8978  |
| 10745677           | Ccl3        | 0.277145         | 1.0000  | 0.256473          | 1.0000  | 2.444062           | 0.0117  | 1.117496           | 0.9998  |
| 10758351           | Niacr1      | 0.106371         | 1.0000  | 0.163894          | 1.0000  | 0.984937           | 0.0000  | 0.391405           | 0.9998  |
| 10761025           | LOC685020   | 0.189291         | 1.0000  | 0.237884          | 1.0000  | 0.978228           | 0.0066  | 0.711975           | 0.6116  |
| 10769910           | Slamf7      | -0.157222        | 1.0000  | -0.229407         | 1.0000  | 1.076905           | 0.0016  | 0.392880           | 0.9998  |
| 10775896           | Cxcl2       | 0.113860         | 1.0000  | 0.258817          | 1.0000  | 2.529242           | 0.0033  | 1.097352           | 0.9998  |
| 10778558           | Plek        | 0.014477         | 1.0000  | -0.031948         | 1.0000  | 0.829011           | 0.0133  | 0.450214           | 0.9998  |
| 10781877           | Irg1        | 0.062283         | 1.0000  | 0.201298          | 1.0000  | 1.316706           | 0.0000  | 0.578347           | 0.9998  |
| 10788889           | Htra4       | 0.113981         | 1.0000  | 0.109404          | 1.0000  | 0.377071           | 0.0033  | 0.269605           | 0.4823  |
| 10791902           | Slc7a2      | 0.181227         | 1.0000  | 0.105693          | 1.0000  | 1.056127           | 0.0182  | 0.562257           | 0.9998  |
| 10798558           | Aoah        | -0.021734        | 1.0000  | 0.021951          | 1.0000  | 0.314931           | 0.0046  | 0.048779           | 0.9998  |
| 10821851           | Il7r        | 0.287554         | 1.0000  | 0.199842          | 1.0000  | 2.027045           | 0.0000  | 1.399074           | 0.0185  |
| 10831077           | Ier3        | -0.033040        | 1.0000  | 0.219283          | 1.0000  | 0.827343           | 0.0123  | 0.569967           | 0.9925  |
| 10834109           | Il1rn       | 0.672270         | 1.0000  | 0.317487          | 1.0000  | 1.413221           | 0.0066  | 1.447650           | 0.0355  |
| 10835865           | Olr410      | -0.147984        | 1.0000  | -0.215011         | 1.0000  | -0.275022          | 0.0188  | -0.191897          | 0.9998  |
| 10844223           | Ptges       | 0.163919         | 1.0000  | 0.274638          | 1.0000  | 1.818516           | 0.0035  | 0.866773           | 0.9998  |
| 10849833           | Il1a        | 0.150534         | 1.0000  | 0.241433          | 1.0000  | 2.464517           | 0.0005  | 0.987015           | 0.9998  |
| 10849841           | Il1b        | 0.449700         | 1.0000  | 0.528109          | 1.0000  | 2.839898           | 0.0071  | 1.417696           | 0.9998  |
| 10850530           | Cd93        | -0.510835        | 1.0000  | -0.417982         | 1.0000  | -0.855201          | 0.0423  | -0.750930          | 0.5815  |
| 10858599           | Clec4d      | 0.255843         | 1.0000  | 0.329086          | 1.0000  | 1.887456           | 0.0000  | 1.357309           | 0.0355  |
| 10860852           | Tfpi2       | -0.051969        | 1.0000  | 0.005643          | 1.0000  | 1.752720           | 0.0000  | 0.831305           | 0.4327  |
| 10865381           | Clec4e      | 0.017886         | 1.0000  | 0.197501          | 1.0000  | 0.824218           | 0.0035  | 0.572416           | 0.5978  |
| 10877992           | ---         | -0.043671        | 1.0000  | 0.083798          | 1.0000  | 0.912037           | 0.0103  | 0.508284           | 0.9998  |
| 10901555           | Dram        | 0.123386         | 1.0000  | 0.067162          | 1.0000  | 0.647616           | 0.0186  | 0.453723           | 0.9998  |
| 10907858           | Mmp13       | -0.078790        | 1.0000  | -0.100391         | 1.0000  | 0.742731           | 0.0346  | 0.055564           | 0.9998  |
| 10907869           | Mmp12       | 0.569099         | 1.0000  | 0.346381          | 1.0000  | 2.784082           | 0.0075  | 1.489016           | 0.9998  |
| 10907881           | Mmp3        | -0.004820        | 1.0000  | -0.191748         | 1.0000  | 0.714953           | 0.0117  | -0.134049          | 0.9998  |
| 10909866           | LOC363060   | 0.146499         | 1.0000  | -0.285562         | 1.0000  | 1.635587           | 0.0005  | 0.996482           | 0.5978  |
| 10912112           | Bcl2a1d     | 0.128987         | 1.0000  | 0.052642          | 1.0000  | 0.622232           | 0.0035  | 0.187711           | 0.9998  |
| 10933345           | Tlr7        | 0.189584         | 1.0000  | 0.236185          | 1.0000  | 0.848698           | 0.0035  | 0.705774           | 0.2022  |
