# Supplementary material
Source: PubMed Central journal article supplement (PMC3683774)
Supplement: 1304913110_sd02.pdf [file 1304913110_sd02.pdf]

**24 Hours**

| Affymetrix Probe ID | Gene Symbol | <u>P-</u> |         | <u>I+S</u> |         | <u>P+LS</u> |         | <u>P+TS</u> |         |
|---------------------|-------------|-----------|---------|------------|---------|-------------|---------|-------------|---------|
|                     |             | Log FC    | p-Value | Log FC     | p-Value | Log FC      | p-Value | Log FC      | p-Value |
| 10700274            | ---         | 0.003130  | 0.9999  | -0.126529  | 0.9489  | -0.293918   | 0.8873  | -0.879392   | 0.0427  |
| 10700317            | ---         | -0.130530 | 0.9999  | -0.265288  | 0.5488  | -0.358886   | 0.4639  | -0.974054   | 0.0005  |
| 10700503            | ---         | -0.093346 | 0.9999  | -0.354938  | 0.5194  | -0.373013   | 0.6683  | -0.721404   | 0.0341  |
| 10700530            | ---         | -0.676758 | 0.9999  | -0.842870  | 0.0410  | -0.804821   | 0.1183  | -0.609720   | 0.1638  |
| 10700531            | ---         | -0.086122 | 0.9999  | -0.086914  | 0.9172  | -0.176452   | 0.8095  | -0.461676   | 0.0255  |
| 10700615            | ---         | 0.012260  | 0.9999  | -0.200385  | 0.8207  | -0.225054   | 0.8790  | -0.648616   | 0.0442  |
| 10700667            | ---         | 0.001728  | 0.9999  | 0.513171   | 0.0124  | 0.295644    | 0.4212  | 0.297144    | 0.1895  |
| 10700723            | ---         | -0.023576 | 0.9999  | -0.223822  | 0.4024  | -0.266822   | 0.4153  | -0.407600   | 0.0299  |
| 10701019            | ---         | 0.342535  | 0.9999  | 0.510831   | 0.2938  | 0.713755    | 0.1505  | 0.850229    | 0.0235  |
| 10701087            | ---         | 0.217405  | 0.9999  | -0.022435  | 0.9875  | 0.165651    | 0.9275  | 0.625540    | 0.0324  |
| 10701250            | ---         | -0.157462 | 0.9999  | -0.207857  | 0.8910  | -0.441014   | 0.6997  | -0.932292   | 0.0272  |
| 10701334            | ---         | -0.160930 | 0.9999  | -0.057787  | 0.9420  | -0.258667   | 0.4230  | -0.452496   | 0.0143  |
| 10701504            | ---         | 0.394116  | 0.9999  | 0.237656   | 0.7859  | 0.241810    | 0.8796  | 0.687115    | 0.0484  |
| 10701615            | ---         | -0.128610 | 0.9999  | -0.211150  | 0.8350  | -0.292517   | 0.8239  | -0.848907   | 0.0174  |
| 10701802            | Plag1       | 0.079558  | 0.9999  | -1.307579  | 0.0004  | -0.915903   | 0.0335  | -0.324598   | 0.5294  |
| 10701817            | Fuca2       | 0.091724  | 0.9999  | -1.223906  | 0.0073  | -0.522620   | 0.6562  | -0.118030   | 0.9066  |
| 10701846            | Cited2      | -0.027654 | 0.9999  | 0.890592   | 0.0018  | 0.678369    | 0.0529  | 0.379257    | 0.2596  |
| 10702096            | Lama2       | 0.182332  | 0.9999  | -0.944792  | 0.0380  | -0.373551   | 0.8219  | -0.156096   | 0.8596  |
| 10702165            | L3mbtl3     | -0.059385 | 0.9999  | 0.648356   | 0.0604  | 0.623696    | 0.1614  | 0.842752    | 0.0122  |
| 10702201            | Akap7       | -0.023239 | 0.9999  | -0.434466  | 0.0329  | -0.327282   | 0.2829  | -0.274467   | 0.2190  |
| 10702224            | Enpp3       | 0.141165  | 0.9999  | -1.795581  | 0.0001  | -1.295241   | 0.0136  | -1.072115   | 0.0230  |
| 10702286            | Rps12       | -0.144633 | 0.9999  | 0.020439   | 0.9880  | -0.133209   | 0.9467  | -0.642450   | 0.0284  |
| 10702306            | Tcf21       | 0.225669  | 0.9999  | -1.314383  | 0.0020  | -1.313251   | 0.0070  | -1.329840   | 0.0038  |
| 10703189            | Mllt4       | 0.082701  | 0.9999  | 0.308558   | 0.3936  | 0.327811    | 0.5271  | 0.535448    | 0.0355  |
| 10703310            | Smoc2       | -0.045438 | 0.9999  | -1.095729  | 0.0109  | -0.145612   | 0.9614  | 0.322531    | 0.6168  |
| 10703375            | Rpl35a      | -0.130089 | 0.9999  | 0.050046   | 0.9641  | -0.177230   | 0.8255  | -0.736466   | 0.0011  |
| 10703818            | Zfp418      | 0.035085  | 0.9999  | 0.349533   | 0.6082  | 0.571751    | 0.3446  | 0.917440    | 0.0157  |
| 10703953            | Il11        | -0.224483 | 0.9999  | 1.202094   | 0.0476  | 1.931549    | 0.0021  | 0.980504    | 0.1156  |
| 10704084            | Ppp1r12c    | 0.038375  | 0.9999  | 0.310722   | 0.0378  | 0.167697    | 0.6431  | 0.128465    | 0.5173  |
| 10704198            | RGD1564617  | -0.080123 | 0.9999  | -0.021816  | 0.9861  | -0.283387   | 0.6727  | -0.561038   | 0.0312  |
| 10704242            | Rps5        | -0.054770 | 0.9999  | 0.008953   | 0.9888  | -0.090607   | 0.8948  | -0.274783   | 0.0472  |
| 10704411            | Rps19       | -0.163452 | 0.9999  | 0.093113   | 0.9312  | -0.149127   | 0.9229  | -0.541122   | 0.0342  |
| 10704499            | Ap2s1       | -0.014845 | 0.9999  | -0.229990  | 0.3234  | -0.258386   | 0.3835  | -0.389037   | 0.0269  |
| 10704505            | Slc1a5      | 0.060539  | 0.9999  | -0.613269  | 0.1005  | -0.504926   | 0.3890  | -0.704324   | 0.0418  |
| 10704794            | Rtn2        | 0.046335  | 0.9999  | 0.278493   | 0.0861  | 0.332851    | 0.0705  | 0.442639    | 0.0045  |
| 10704808            | Ercc1       | 0.056730  | 0.9999  | 0.630360   | 0.0124  | 0.714649    | 0.0119  | 0.461577    | 0.0781  |
| 10704819            | LOC686781   | 0.007975  | 0.9999  | 0.661033   | 0.0048  | 0.466119    | 0.1444  | 0.215475    | 0.5077  |
| 10704895            | Zfp180      | -0.002439 | 0.9999  | 0.374057   | 0.0424  | 0.304446    | 0.2509  | 0.311302    | 0.0979  |
| 10705032            | ---         | 0.341260  | 0.9999  | 0.239658   | 0.4345  | 0.268711    | 0.5242  | 0.452002    | 0.0300  |
| 10705058            | Rps19       | -0.182830 | 0.9999  | 0.096884   | 0.9307  | -0.169959   | 0.9017  | -0.580181   | 0.0286  |
| 10705618            | Hnrnpl      | 0.117081  | 0.9999  | -0.220199  | 0.2802  | -0.213423   | 0.4876  | -0.373689   | 0.0201  |
| 10705631            | Ech1        | 0.272717  | 0.9999  | -0.013993  | 0.9907  | 0.226660    | 0.8215  | 0.562193    | 0.0385  |
| 10706219            | Rpl27a      | -0.097020 | 0.9999  | 0.061683   | 0.9661  | -0.189913   | 0.8857  | -0.675530   | 0.0170  |
| 10706545            | Syt3        | 0.070071  | 0.9999  | 0.046813   | 0.9236  | 0.217348    | 0.1747  | 0.293966    | 0.0143  |

|          |            |           |        |           |        |           |        |           |        |
|----------|------------|-----------|--------|-----------|--------|-----------|--------|-----------|--------|
| 10706852 | Plekha4    | -0.042437 | 0.9999 | -0.279870 | 0.0892 | -0.216587 | 0.4293 | -0.311134 | 0.0435 |
| 10706884 | Bcat2      | 0.075476  | 0.9999 | -0.469287 | 0.0225 | -0.201824 | 0.7462 | -0.116551 | 0.7342 |
| 10707386 | Rhoq       | -0.131577 | 0.9999 | 0.489350  | 0.0442 | 0.436557  | 0.1770 | 0.328288  | 0.2104 |
| 10707707 | Mtmr10     | 0.041543  | 0.9999 | 0.243053  | 0.5581 | 0.299625  | 0.5730 | 0.481789  | 0.0498 |
| 10707824 | Sels       | -0.076969 | 0.9999 | -0.221873 | 0.4754 | -0.201952 | 0.7284 | -0.406119 | 0.0448 |
| 10708247 | Alpk3      | -0.083397 | 0.9999 | 0.372246  | 0.1228 | 0.372295  | 0.2383 | 0.473647  | 0.0307 |
| 10708687 | Fam181b    | 0.340701  | 0.9999 | -0.002794 | 0.9993 | 0.662267  | 0.3452 | 1.036433  | 0.0184 |
| 10708695 | Odz4       | -0.062784 | 0.9999 | -0.359608 | 0.0139 | -0.196558 | 0.4997 | -0.111704 | 0.6060 |
| 10709020 | Pgm211     | 0.158174  | 0.9999 | 0.689250  | 0.0221 | 0.741605  | 0.0311 | 0.801445  | 0.0096 |
| 10709048 | C2cd3      | 0.072252  | 0.9999 | 0.122872  | 0.8603 | 0.235156  | 0.6920 | 0.457030  | 0.0400 |
| 10709093 | Ucp2       | 0.334807  | 0.9999 | 0.171187  | 0.7831 | 0.457790  | 0.1703 | 0.607357  | 0.0158 |
| 10709157 | Stard10    | 0.057432  | 0.9999 | -0.187051 | 0.6279 | 0.225839  | 0.6698 | 0.424303  | 0.0402 |
| 10709347 | Stim1      | 0.300237  | 0.9999 | -0.592816 | 0.0036 | -0.280778 | 0.5008 | -0.090614 | 0.8146 |
| 10709644 | ---        | 0.151318  | 0.9999 | 0.461236  | 0.0287 | 0.074546  | 0.9591 | 0.388207  | 0.0705 |
| 10709779 | Rpl27a     | -0.080420 | 0.9999 | 0.045520  | 0.9753 | -0.157507 | 0.9124 | -0.608491 | 0.0194 |
| 10709788 | RGD1306959 | -0.475698 | 0.9999 | 0.727666  | 0.0366 | 0.262836  | 0.8550 | 0.135023  | 0.8325 |
| 10710067 | Spon1      | -0.055940 | 0.9999 | -1.100424 | 0.0221 | -1.138764 | 0.0440 | -0.505562 | 0.3988 |
| 10710695 | Tnrc6a     | 0.101836  | 0.9999 | 0.501241  | 0.0237 | 0.507211  | 0.0529 | 0.548778  | 0.0155 |
| 10710771 | Rps15a     | -0.130459 | 0.9999 | 0.117617  | 0.9411 | -0.142794 | 0.9562 | -0.840612 | 0.0206 |
| 10710782 | Il4ra      | 0.067757  | 0.9999 | -0.608815 | 0.0194 | -0.436590 | 0.2619 | -0.344632 | 0.2449 |
| 10711401 | Bag3       | 0.172665  | 0.9999 | 0.551625  | 0.0170 | 0.454528  | 0.1333 | 0.543045  | 0.0206 |
| 10711566 | Htra1      | 0.036647  | 0.9999 | -0.667265 | 0.0148 | -0.487901 | 0.2095 | -0.563520 | 0.0427 |
| 10711733 | ---        | 0.084500  | 0.9999 | 0.423021  | 0.0787 | 0.448805  | 0.1216 | 0.500195  | 0.0285 |
| 10711791 | Dock1      | 0.091511  | 0.9999 | -0.569671 | 0.0382 | -0.365451 | 0.4777 | -0.302189 | 0.3531 |
| 10712171 | Ifitm1     | -0.026305 | 0.9999 | -1.583657 | 0.0013 | -1.427511 | 0.0125 | -1.729727 | 0.0012 |
| 10712245 | Phrf1      | 0.038832  | 0.9999 | 0.089093  | 0.8709 | 0.112343  | 0.8880 | 0.358912  | 0.0308 |
| 10712517 | Cd81       | 0.064870  | 0.9999 | 0.139960  | 0.3909 | 0.126977  | 0.6661 | 0.239907  | 0.0372 |
| 10712935 | Ctsf       | 0.117559  | 0.9999 | 0.179738  | 0.7087 | 0.547975  | 0.0307 | 0.534009  | 0.0187 |
| 10713061 | Efemp2     | 0.009344  | 0.9999 | -0.758185 | 0.0243 | -0.585769 | 0.2248 | -0.684912 | 0.0436 |
| 10713176 | Fau        | -0.060270 | 0.9999 | -0.041350 | 0.9561 | -0.054700 | 0.9606 | -0.334763 | 0.0347 |
| 10714020 | Ms4a11     | -0.036653 | 0.9999 | -0.355565 | 0.0323 | -0.211191 | 0.5289 | -0.200981 | 0.2899 |
| 10714080 | Osbp       | -0.008208 | 0.9999 | 0.297072  | 0.0460 | 0.316205  | 0.0721 | 0.331174  | 0.0228 |
| 10714323 | Aldh1a1    | 0.386311  | 0.9999 | -0.304320 | 0.7719 | 0.491506  | 0.6326 | 1.088194  | 0.0116 |
| 10714505 | Kank1      | -0.191568 | 0.9999 | 0.691558  | 0.0007 | 0.464462  | 0.0660 | 0.274235  | 0.2461 |
| 10714667 | Jak2       | 0.134370  | 0.9999 | -0.744311 | 0.0185 | -0.476687 | 0.3709 | -0.155069 | 0.7811 |
| 10714709 | RGD1310016 | 0.071520  | 0.9999 | 0.346302  | 0.2443 | 0.449028  | 0.1667 | 0.538133  | 0.0259 |
| 10714818 | Paps2      | 0.049498  | 0.9999 | -0.071454 | 0.9560 | 0.513169  | 0.1617 | 0.573652  | 0.0359 |
| 10714907 | Ifit1      | -0.220988 | 0.9999 | -0.550164 | 0.0125 | -0.696526 | 0.0032 | -0.654852 | 0.0043 |
| 10715400 | Pyroxd2    | 0.014440  | 0.9999 | -0.995789 | 0.0003 | -0.709397 | 0.0248 | -0.331401 | 0.3127 |
| 10715667 | Kazald1    | -0.007681 | 0.9999 | -0.703131 | 0.0350 | -0.459884 | 0.4383 | -0.589809 | 0.0810 |
| 10715825 | Sufu       | 0.038170  | 0.9999 | 0.561138  | 0.0100 | 0.538265  | 0.0328 | 0.593455  | 0.0088 |
| 10716064 | Mxi1       | 0.228562  | 0.9999 | 0.148177  | 0.7681 | 0.441768  | 0.0763 | 0.544800  | 0.0095 |
| 10716085 | Rps12      | -0.124956 | 0.9999 | 0.027277  | 0.9861 | -0.120109 | 0.9571 | -0.721065 | 0.0288 |
| 10716785 | Rab32      | 0.053844  | 0.9999 | -0.727675 | 0.0353 | -0.586995 | 0.2277 | -0.462833 | 0.2198 |
| 10716896 | Phactr2    | 0.086672  | 0.9999 | -0.825961 | 0.0030 | -0.412352 | 0.4218 | -0.156398 | 0.7495 |
| 10716984 | Heca       | -0.010832 | 0.9999 | 0.564365  | 0.0048 | 0.475035  | 0.0526 | 0.379548  | 0.0737 |
| 10716990 | LOC685045  | -0.185932 | 0.9999 | -0.021954 | 0.9889 | -0.183420 | 0.9380 | -0.681174 | 0.0500 |

|          |            |           |        |           |        |           |        |           |        |
|----------|------------|-----------|--------|-----------|--------|-----------|--------|-----------|--------|
| 10717118 | Ptprk      | 0.325899  | 0.9999 | -0.964818 | 0.0144 | -0.303349 | 0.8583 | 0.142366  | 0.8553 |
| 10717233 | Ctgf       | -0.727803 | 0.9999 | 1.092338  | 0.0380 | 1.044032  | 0.1114 | 0.636685  | 0.2850 |
| 10717331 | Sgk1       | 0.233899  | 0.9999 | -1.027234 | 0.0003 | -0.364313 | 0.5354 | -0.207660 | 0.6253 |
| 10717434 | Rpl26      | -0.129470 | 0.9999 | 0.033490  | 0.9790 | -0.090853 | 0.9562 | -0.519470 | 0.0342 |
| 10717488 | Slc12a7    | -0.094832 | 0.9999 | 0.483671  | 0.0268 | 0.279030  | 0.5325 | 0.329447  | 0.1624 |
| 10717779 | Fbxo5      | -0.167539 | 0.9999 | -1.153011 | 0.0809 | -0.894744 | 0.4075 | -1.371100 | 0.0284 |
| 10717865 | Serac1     | 0.086756  | 0.9999 | 0.044190  | 0.9637 | 0.166921  | 0.7957 | 0.393292  | 0.0363 |
| 10718199 | LOC679206  | -0.158073 | 0.9999 | 0.719396  | 0.0375 | 0.441322  | 0.5239 | 0.049107  | 0.9533 |
| 10718208 | Dact2      | -0.179956 | 0.9999 | 0.601873  | 0.0378 | 0.380205  | 0.4915 | 0.273322  | 0.4552 |
| 10718647 | RGD1308782 | -0.062288 | 0.9999 | 0.194833  | 0.5932 | 0.177196  | 0.8039 | 0.437466  | 0.0324 |
| 10718696 | Znf667     | 0.030998  | 0.9999 | -0.048940 | 0.9496 | 0.037722  | 0.9746 | 0.467967  | 0.0070 |
| 10719204 | Ehd2       | 0.072401  | 0.9999 | -0.806000 | 0.0008 | -0.504847 | 0.1106 | -0.354902 | 0.1930 |
| 10719654 | Zfp94      | 0.069584  | 0.9999 | 0.222306  | 0.4572 | 0.260836  | 0.5029 | 0.462837  | 0.0201 |
| 10719829 | Lipe       | 0.066316  | 0.9999 | 0.221346  | 0.5766 | 0.336198  | 0.3811 | 0.691306  | 0.0030 |
| 10720166 | Supt5h     | 0.176460  | 0.9999 | 0.304032  | 0.1261 | 0.384426  | 0.0770 | 0.531048  | 0.0038 |
| 10720215 | Zfp36      | 0.048397  | 0.9999 | -0.317191 | 0.3053 | -0.377243 | 0.2978 | -0.528318 | 0.0258 |
| 10720522 | RGD1564344 | 0.061771  | 0.9999 | 0.121296  | 0.6659 | 0.131534  | 0.7630 | 0.319091  | 0.0235 |
| 10720533 | Zfp74      | 0.123225  | 0.9999 | -0.128972 | 0.9025 | 0.090116  | 0.9616 | 0.611258  | 0.0306 |
| 10720539 | LOC499124  | 0.173132  | 0.9999 | 0.136758  | 0.8088 | -0.014304 | 0.9955 | 0.479309  | 0.0232 |
| 10720648 | Lin37      | 0.056207  | 0.9999 | 0.387850  | 0.0943 | 0.359473  | 0.2570 | 0.491463  | 0.0227 |
| 10720918 | Gramd1a    | 0.140085  | 0.9999 | -0.047969 | 0.9587 | 0.168651  | 0.8033 | 0.427864  | 0.0284 |
| 10721641 | Rcn3       | 0.012114  | 0.9999 | -0.664934 | 0.0124 | -0.218972 | 0.8351 | -0.528094 | 0.0518 |
| 10722549 | Klf13      | 0.181605  | 0.9999 | 0.154458  | 0.6747 | 0.327190  | 0.1881 | 0.446328  | 0.0155 |
| 10722903 | Mfge8      | -0.106813 | 0.9999 | 0.409485  | 0.0215 | 0.190042  | 0.6920 | -0.031371 | 0.9415 |
| 10723020 | Idh2       | 0.095120  | 0.9999 | -0.538429 | 0.0290 | -0.226477 | 0.7727 | -0.098977 | 0.8279 |
| 10723131 | Blm        | 0.107665  | 0.9999 | -0.186529 | 0.3416 | -0.303501 | 0.0896 | -0.307057 | 0.0343 |
| 10723233 | Rps17      | -0.163096 | 0.9999 | 0.010141  | 0.9945 | -0.135290 | 0.9482 | -0.850808 | 0.0068 |
| 10723982 | Mrpl48     | -0.110581 | 0.9999 | -0.202636 | 0.7692 | -0.303524 | 0.6798 | -0.587525 | 0.0368 |
| 10724131 | Il18bp     | 0.146802  | 0.9999 | -0.765962 | 0.0001 | -0.512875 | 0.0233 | -0.411689 | 0.0405 |
| 10724311 | Hbb // Hbb | 0.226697  | 0.9999 | -1.282289 | 0.0153 | 0.312140  | 0.9229 | -0.369914 | 0.6479 |
| 10724315 | Hbb        | 0.290563  | 0.9999 | -1.449674 | 0.0179 | 0.423050  | 0.8844 | -0.407020 | 0.6715 |
| 10724319 | MGC72973   | 0.303511  | 0.9999 | -1.609977 | 0.0086 | 0.255465  | 0.9546 | -0.568491 | 0.4934 |
| 10724745 | St5        | -0.040935 | 0.9999 | -0.211232 | 0.5655 | -0.499346 | 0.0454 | -0.599881 | 0.0064 |
| 10724819 | Dennd5a    | 0.030654  | 0.9999 | 0.242526  | 0.1972 | 0.280425  | 0.2067 | 0.337015  | 0.0341 |
| 10724950 | Galnt14    | -0.066530 | 0.9999 | 0.226987  | 0.5932 | 0.380309  | 0.2959 | 0.518622  | 0.0300 |
| 10724967 | Dkk3       | 0.228566  | 0.9999 | -0.819454 | 0.0057 | -0.067399 | 0.9748 | 0.391163  | 0.2611 |
| 10725105 | Rps13      | -0.080353 | 0.9999 | 0.054198  | 0.9767 | -0.184068 | 0.9417 | -0.779131 | 0.0317 |
| 10725159 | Rps15a     | -0.147208 | 0.9999 | 0.116946  | 0.9403 | -0.127719 | 0.9584 | -0.862086 | 0.0161 |
| 10725235 | Syt17      | 0.085357  | 0.9999 | 0.363512  | 0.1312 | 0.468713  | 0.0728 | 0.516692  | 0.0185 |
| 10725279 | Gprc5b     | 0.134052  | 0.9999 | 0.221349  | 0.5575 | 0.372669  | 0.2497 | 0.459334  | 0.0377 |
| 10725445 | Gga2       | 0.228709  | 0.9999 | -0.400988 | 0.0090 | -0.162666 | 0.7053 | -0.047085 | 0.8851 |
| 10726118 | ---        | -0.033762 | 0.9999 | -0.172758 | 0.6564 | 0.067916  | 0.9606 | 0.419873  | 0.0341 |
| 10726611 | Echs1      | 0.034146  | 0.9999 | -0.601735 | 0.0393 | -0.287848 | 0.7284 | -0.375682 | 0.2449 |
| 10726650 | Rpl9       | -0.118150 | 0.9999 | -0.021923 | 0.9767 | -0.067173 | 0.9436 | -0.305697 | 0.0265 |
| 10726679 | Ifitm2     | 0.044497  | 0.9999 | -0.690309 | 0.0048 | -0.458909 | 0.1872 | -0.516336 | 0.0426 |
| 10726682 | Ifitm3     | 0.025097  | 0.9999 | -1.442129 | 0.0000 | -0.902157 | 0.0032 | -0.742942 | 0.0111 |
| 10726758 | Irf7       | -0.288167 | 0.9999 | -0.771656 | 0.0016 | -0.900577 | 0.0007 | -0.715098 | 0.0064 |

|          |            |           |        |           |        |           |        |           |        |
|----------|------------|-----------|--------|-----------|--------|-----------|--------|-----------|--------|
| 10726929 | Dusp8      | -0.635968 | 0.9999 | 1.023213  | 0.0415 | 0.775298  | 0.3148 | 0.500283  | 0.4187 |
| 10727056 | Cdkn1c     | 0.116889  | 0.9999 | -0.017189 | 0.9887 | 0.267865  | 0.7027 | 0.568255  | 0.0277 |
| 10727462 | Rpl35a     | -0.131338 | 0.9999 | 0.055435  | 0.9590 | -0.173201 | 0.8557 | -0.745314 | 0.0015 |
| 10727740 | Klc2       | 0.128864  | 0.9999 | 0.460454  | 0.0154 | 0.293645  | 0.3457 | 0.481201  | 0.0136 |
| 10727977 | Ehbp111    | -0.127851 | 0.9999 | 0.695320  | 0.0007 | 0.441478  | 0.0897 | 0.214309  | 0.4187 |
| 10728060 | Pola2      | -0.010085 | 0.9999 | -0.623380 | 0.0144 | -0.557713 | 0.0728 | -0.556469 | 0.0315 |
| 10728164 | Ppp2r5b    | -0.043704 | 0.9999 | 0.580431  | 0.0002 | 0.446947  | 0.0117 | 0.312975  | 0.0514 |
| 10728425 | Rtn3       | 0.100267  | 0.9999 | 0.097010  | 0.5909 | 0.074023  | 0.8697 | 0.251507  | 0.0143 |
| 10729009 | Dtx4       | 0.120338  | 0.9999 | -0.861629 | 0.0004 | -0.661102 | 0.0190 | -0.728779 | 0.0045 |
| 10729269 | Anxa1      | 0.007579  | 0.9999 | -0.669242 | 0.0434 | -0.573661 | 0.2067 | -1.030703 | 0.0021 |
| 10729314 | Gda        | 0.034664  | 0.9999 | -1.663723 | 0.0048 | -1.209630 | 0.1200 | -0.920818 | 0.1623 |
| 10729552 | ---        | -0.060484 | 0.9999 | 0.399495  | 0.2478 | 0.663848  | 0.0402 | 0.361554  | 0.2503 |
| 10729777 | Ch25h      | -0.153862 | 0.9999 | -1.027372 | 0.0029 | -0.742859 | 0.0963 | -0.787483 | 0.0293 |
| 10729852 | ---        | -0.184590 | 0.9999 | 0.096081  | 0.9299 | -0.191632 | 0.8678 | -0.554134 | 0.0331 |
| 10730342 | Ubt1       | -0.106937 | 0.9999 | 0.426252  | 0.0396 | 0.314480  | 0.3358 | 0.138105  | 0.6573 |
| 10730610 | ---        | -0.145873 | 0.9999 | 0.752038  | 0.0411 | 0.509242  | 0.4313 | 0.419794  | 0.3256 |
| 10730855 | Mxi1       | 0.230173  | 0.9999 | 0.126193  | 0.8256 | 0.425155  | 0.0924 | 0.532328  | 0.0104 |
| 10730869 | Add3       | 0.182321  | 0.9999 | -0.780124 | 0.0002 | -0.576080 | 0.0133 | -0.270171 | 0.2503 |
| 10730895 | LOC682679  | -0.104847 | 0.9999 | 0.002283  | 0.9992 | -0.293466 | 0.7718 | -0.677888 | 0.0332 |
| 10730898 | Gpam       | 0.328454  | 0.9999 | -0.265435 | 0.6626 | 0.303380  | 0.7352 | 0.607567  | 0.0491 |
| 10730954 | Nrap       | -0.195675 | 0.9999 | 0.750326  | 0.0008 | 0.689472  | 0.0070 | 0.656899  | 0.0064 |
| 10730999 | Dclre1a    | 0.075252  | 0.9999 | 0.196450  | 0.6859 | 0.179228  | 0.8577 | 0.546169  | 0.0208 |
| 10731009 | RGD1307158 | 0.114766  | 0.9999 | 0.358196  | 0.3653 | 0.392101  | 0.4627 | 0.677738  | 0.0190 |
| 10731130 | Pdzd8      | 0.049217  | 0.9999 | 0.231622  | 0.3278 | 0.137145  | 0.8519 | 0.420795  | 0.0190 |
| 10731729 | Rpl37a     | -0.088960 | 0.9999 | 0.020423  | 0.9840 | -0.100010 | 0.9443 | -0.413920 | 0.0449 |
| 10732068 | Dci        | 0.001076  | 0.9999 | -0.545635 | 0.0191 | -0.189447 | 0.8403 | -0.078305 | 0.8676 |
| 10732649 | Nkx2-5     | 0.061306  | 0.9999 | 0.299240  | 0.2335 | 0.205842  | 0.7284 | 0.457571  | 0.0265 |
| 10732652 | Dusp1      | -0.426389 | 0.9999 | 0.797243  | 0.0185 | 0.703951  | 0.0975 | 0.733105  | 0.0322 |
| 10732821 | Rpl32      | -0.082357 | 0.9999 | 0.033043  | 0.9705 | -0.083140 | 0.9433 | -0.404537 | 0.0183 |
| 10733004 | ---        | -0.061694 | 0.9999 | 0.741109  | 0.0080 | 0.573054  | 0.1166 | 0.104289  | 0.8512 |
| 10733056 | Ifi47      | -0.060046 | 0.9999 | -0.575418 | 0.0469 | -0.391860 | 0.4478 | -0.439031 | 0.1459 |
| 10733063 | Rpl31      | -0.078217 | 0.9999 | 0.062163  | 0.9659 | -0.094223 | 0.9609 | -0.705453 | 0.0123 |
| 10733195 | Tbc1d9b    | 0.192542  | 0.9999 | 0.095917  | 0.8709 | 0.144897  | 0.8348 | 0.445210  | 0.0136 |
| 10733218 | RGD1564036 | 0.078114  | 0.9999 | 0.364052  | 0.0221 | 0.241225  | 0.3664 | 0.049951  | 0.8789 |
| 10733225 | Mgat4b     | 0.149987  | 0.9999 | 0.410668  | 0.0367 | 0.456942  | 0.0416 | 0.394379  | 0.0419 |
| 10733484 | Aff4       | -0.118754 | 0.9999 | 0.130608  | 0.7791 | 0.170932  | 0.7740 | 0.385531  | 0.0382 |
| 10733676 | Hint1      | -0.073790 | 0.9999 | -0.015827 | 0.9928 | -0.137502 | 0.9585 | -0.793268 | 0.0388 |
| 10733680 | Gpx3       | 0.090796  | 0.9999 | -0.821317 | 0.0384 | -0.125532 | 0.9616 | 0.270229  | 0.6479 |
| 10733688 | Rpl13      | -0.052937 | 0.9999 | 0.039480  | 0.9514 | -0.032777 | 0.9733 | -0.303527 | 0.0306 |
| 10733697 | Slc36a1    | 0.330608  | 0.9999 | 0.130446  | 0.7546 | 0.134679  | 0.8557 | 0.425751  | 0.0174 |
| 10733790 | Igtp       | -0.073331 | 0.9999 | -0.373700 | 0.0237 | -0.352136 | 0.0823 | -0.352686 | 0.0341 |
| 10733914 | ---        | 0.003141  | 0.9999 | 0.039136  | 0.9660 | 0.110931  | 0.9063 | 0.367492  | 0.0365 |
| 10734061 | LOC691649  | 0.085353  | 0.9999 | 0.096024  | 0.9164 | 0.218192  | 0.7521 | 0.526131  | 0.0206 |
| 10734069 | Drg2       | 0.034064  | 0.9999 | 0.065989  | 0.9273 | 0.142071  | 0.8290 | 0.391805  | 0.0235 |
| 10734472 | RGD1565284 | 0.075711  | 0.9999 | -0.654795 | 0.0053 | -0.384511 | 0.3111 | -0.140765 | 0.7249 |
| 10734673 | Gas7       | 0.047907  | 0.9999 | -0.736734 | 0.0024 | -0.632295 | 0.0272 | -0.454951 | 0.0808 |
| 10734817 | Rpl26      | -0.109917 | 0.9999 | 0.024950  | 0.9832 | -0.071680 | 0.9635 | -0.495123 | 0.0338 |

|          |            |           |        |           |        |           |        |           |        |
|----------|------------|-----------|--------|-----------|--------|-----------|--------|-----------|--------|
| 10734866 | Tmem107    | -0.179632 | 0.9999 | -0.202214 | 0.6115 | -0.283409 | 0.5177 | -0.561201 | 0.0109 |
| 10734994 | Fxr2       | 0.031119  | 0.9999 | 0.346503  | 0.0240 | 0.257895  | 0.2570 | 0.279015  | 0.0783 |
| 10735077 | Ybx2       | 0.189131  | 0.9999 | 0.213843  | 0.2570 | 0.177244  | 0.6187 | 0.325180  | 0.0321 |
| 10735315 | Rpl36a     | -0.071643 | 0.9999 | 0.034830  | 0.9767 | -0.189423 | 0.8380 | -0.706007 | 0.0033 |
| 10735429 | Txndc17    | -0.074232 | 0.9999 | 0.055215  | 0.9464 | -0.069488 | 0.9562 | -0.420036 | 0.0214 |
| 10735959 | Slc43a2    | 0.146076  | 0.9999 | -0.577050 | 0.0198 | -0.304226 | 0.5858 | -0.289535 | 0.3274 |
| 10736053 | Rpl37      | -0.089963 | 0.9999 | 0.003827  | 0.9969 | -0.129363 | 0.9063 | -0.511073 | 0.0138 |
| 10736163 | Flot2      | 0.186678  | 0.9999 | -0.713618 | 0.0003 | -0.386071 | 0.1397 | -0.196986 | 0.4389 |
| 10736267 | Slc46a1    | -0.029322 | 0.9999 | 0.084661  | 0.8661 | 0.365819  | 0.0439 | 0.440513  | 0.0060 |
| 10736450 | Ankrd13b   | 0.050175  | 0.9999 | 0.369130  | 0.0150 | 0.269524  | 0.2135 | 0.112341  | 0.6215 |
| 10736608 | Rhot1      | 0.188886  | 0.9999 | 0.013586  | 0.9910 | 0.228954  | 0.8102 | 0.558506  | 0.0372 |
| 10736693 | RGD1560900 | -0.065332 | 0.9999 | -0.120676 | 0.8268 | -0.204310 | 0.7053 | -0.512050 | 0.0104 |
| 10736712 | Ccl12      | -0.209974 | 0.9999 | -1.475997 | 0.1006 | -1.335112 | 0.2905 | -1.760334 | 0.0341 |
| 10736784 | Slfn5      | 0.083650  | 0.9999 | -1.245919 | 0.0012 | -0.716942 | 0.1925 | -0.170629 | 0.8148 |
| 10736795 | Slfn2      | -0.249767 | 0.9999 | -0.892019 | 0.0406 | -0.677066 | 0.3086 | -0.798209 | 0.0675 |
| 10736870 | Expi       | -0.096258 | 0.9999 | -0.332296 | 0.0139 | -0.265478 | 0.1360 | -0.260223 | 0.0601 |
| 10737411 | Trim25     | 0.027264  | 0.9999 | -0.391376 | 0.0453 | -0.292464 | 0.3446 | 0.008247  | 0.9876 |
| 10737445 | ---        | -0.002823 | 0.9999 | 0.008047  | 0.9939 | -0.063467 | 0.9670 | -0.441883 | 0.0433 |
| 10737663 | Gngt2      | 0.099045  | 0.9999 | -0.494499 | 0.0219 | -0.345063 | 0.3044 | -0.523323 | 0.0177 |
| 10737763 | Copz2      | 0.017020  | 0.9999 | -0.578402 | 0.0109 | -0.316834 | 0.4620 | -0.300966 | 0.2462 |
| 10737827 | Socs7      | 0.035054  | 0.9999 | 0.436526  | 0.0337 | 0.261323  | 0.5287 | 0.180207  | 0.5079 |
| 10738140 | Igfbp4     | -0.094333 | 0.9999 | -0.793027 | 0.0006 | -0.317268 | 0.4984 | -0.374404 | 0.1413 |
| 10738209 | Cnp        | 0.285040  | 0.9999 | 0.057991  | 0.9764 | 0.753221  | 0.0770 | 0.864293  | 0.0157 |
| 10738341 | Ramp2      | 0.008696  | 0.9999 | -0.603944 | 0.1024 | -0.597087 | 0.2149 | -1.021044 | 0.0036 |
| 10738415 | Ifi35      | -0.185865 | 0.9999 | -0.636959 | 0.0386 | -0.474965 | 0.3169 | -0.276606 | 0.4890 |
| 10738430 | Nbr1       | 0.154580  | 0.9999 | 0.098998  | 0.8839 | 0.240838  | 0.5679 | 0.451927  | 0.0208 |
| 10738451 | Tmem106a   | -0.266496 | 0.9999 | -0.386668 | 0.0180 | -0.375064 | 0.0529 | -0.332646 | 0.0445 |
| 10738482 | Dhx8       | 0.074804  | 0.9999 | 0.197499  | 0.6174 | 0.278650  | 0.5185 | 0.434218  | 0.0430 |
| 10738576 | Grn        | 0.175593  | 0.9999 | -0.428461 | 0.0180 | -0.140769 | 0.8531 | -0.100926 | 0.7413 |
| 10739035 | Ace        | 0.319703  | 0.9999 | -1.319502 | 0.0006 | -0.766067 | 0.1261 | -0.718644 | 0.0711 |
| 10739395 | Rpl38      | -0.066363 | 0.9999 | 0.016403  | 0.9828 | -0.164560 | 0.6615 | -0.379733 | 0.0116 |
| 10739630 | Tsen54     | -0.004132 | 0.9999 | 0.473373  | 0.0319 | 0.264596  | 0.5904 | 0.223117  | 0.4154 |
| 10739913 | ---        | 0.045483  | 0.9999 | -0.436158 | 0.0050 | -0.260430 | 0.2874 | -0.305206 | 0.0618 |
| 10739984 | Rnf213     | -0.088602 | 0.9999 | -1.089595 | 0.0380 | -1.066522 | 0.0970 | -0.921465 | 0.0836 |
| 10739996 | Rnf213     | -0.130231 | 0.9999 | -0.538267 | 0.0194 | -0.464338 | 0.1175 | -0.529497 | 0.0230 |
| 10740016 | Rnf213     | -0.076742 | 0.9999 | -0.536387 | 0.0310 | -0.215986 | 0.8033 | -0.224582 | 0.4926 |
| 10740037 | Rnf213     | -0.128922 | 0.9999 | -0.737241 | 0.0453 | -0.628984 | 0.2163 | -0.571475 | 0.1355 |
| 10740209 | Slc16a3    | -0.306878 | 0.9999 | 0.834829  | 0.0238 | 0.081291  | 0.9748 | -0.059890 | 0.9468 |
| 10740379 | Rps19      | -0.182345 | 0.9999 | 0.011264  | 0.9928 | -0.207485 | 0.8592 | -0.580858 | 0.0342 |
| 10740558 | Rpl35a     | -0.143725 | 0.9999 | 0.045038  | 0.9692 | -0.187888 | 0.8095 | -0.750321 | 0.0011 |
| 10740567 | A2bp1      | 0.246088  | 0.9999 | -0.860829 | 0.0020 | -0.420570 | 0.4017 | -0.377638 | 0.2492 |
| 10740982 | Amdhd2     | -0.014584 | 0.9999 | -0.398741 | 0.0050 | -0.099110 | 0.8931 | -0.158834 | 0.3772 |
| 10741330 | Tmem204    | -0.287088 | 0.9999 | -0.648632 | 0.0313 | -0.596445 | 0.1175 | -0.781014 | 0.0103 |
| 10741664 | ---        | -0.270654 | 0.9999 | 0.107070  | 0.9586 | -0.330484 | 0.8519 | -1.009349 | 0.0193 |
| 10741756 | Hba-a2     | 0.222140  | 0.9999 | -0.959557 | 0.0120 | 0.120990  | 0.9624 | -0.055997 | 0.9533 |
| 10741778 | Hba-a2     | 0.225210  | 0.9999 | -0.984130 | 0.0049 | 0.138720  | 0.9562 | -0.025483 | 0.9794 |
| 10742029 | Rps10      | 0.056689  | 0.9999 | 0.130292  | 0.6181 | 0.037425  | 0.9711 | -0.296544 | 0.0359 |

|          |            |           |        |           |        |           |        |           |        |
|----------|------------|-----------|--------|-----------|--------|-----------|--------|-----------|--------|
| 10742145 | Ccng1      | 0.062113  | 0.9999 | 0.481753  | 0.0139 | 0.230610  | 0.6272 | 0.210467  | 0.3893 |
| 10742213 | Adra1b     | 0.350871  | 0.9999 | -0.904150 | 0.0475 | -0.574474 | 0.5271 | -0.276451 | 0.6950 |
| 10742388 | Sqstm1     | 0.211397  | 0.9999 | 0.403523  | 0.0385 | 0.271287  | 0.4269 | 0.371120  | 0.0559 |
| 10742431 | Rufy1      | 0.125225  | 0.9999 | 0.282712  | 0.4006 | 0.417757  | 0.2004 | 0.506687  | 0.0317 |
| 10742450 | Zfp354c    | 0.086270  | 0.9999 | 0.093161  | 0.9411 | 0.286985  | 0.7299 | 0.655619  | 0.0227 |
| 10742464 | Zfp2       | 0.047631  | 0.9999 | 0.013074  | 0.9925 | 0.221435  | 0.8697 | 0.707395  | 0.0205 |
| 10742571 | Rpl30      | 0.025560  | 0.9999 | 0.040753  | 0.9142 | -0.070913 | 0.8631 | -0.211793 | 0.0265 |
| 10742712 | Anxa6      | 0.117237  | 0.9999 | -0.540724 | 0.0020 | -0.184577 | 0.7284 | 0.055953  | 0.8825 |
| 10742868 | LOC686661  | 0.013009  | 0.9999 | -0.928344 | 0.0012 | -0.744282 | 0.0263 | -0.381025 | 0.2563 |
| 10742989 | Obscn      | -0.027746 | 0.9999 | 0.398066  | 0.1662 | 0.539147  | 0.0740 | 0.553277  | 0.0276 |
| 10743039 | Obscn      | -0.077270 | 0.9999 | 0.567149  | 0.0403 | 0.367959  | 0.4733 | 0.185006  | 0.6554 |
| 10743296 | Top3a      | 0.149334  | 0.9999 | 0.181543  | 0.7333 | 0.429620  | 0.1822 | 0.619365  | 0.0099 |
| 10743341 | ---        | -0.144220 | 0.9999 | 0.625870  | 0.0301 | 0.234360  | 0.8328 | 0.208087  | 0.6255 |
| 10743535 | Ncor1      | 0.035900  | 0.9999 | 0.105041  | 0.8481 | 0.221008  | 0.5901 | 0.468600  | 0.0112 |
| 10743608 | Znf286a    | -0.077047 | 0.9999 | 0.083500  | 0.9025 | 0.190239  | 0.7013 | 0.426477  | 0.0201 |
| 10743626 | RGD1305664 | 0.156124  | 0.9999 | 0.536598  | 0.0375 | 0.233813  | 0.7726 | 0.337910  | 0.2327 |
| 10743774 | Ntn1       | 0.152614  | 0.9999 | -1.033408 | 0.0015 | -0.782491 | 0.0488 | -0.432231 | 0.2591 |
| 10743961 | Tmem88     | -0.121233 | 0.9999 | -0.585882 | 0.1734 | -0.659424 | 0.2017 | -0.738559 | 0.0490 |
| 10744081 | Efnb3      | 0.092545  | 0.9999 | -1.031303 | 0.0130 | -0.361474 | 0.8095 | -0.004852 | 0.9967 |
| 10744098 | Atp1b2     | 0.425520  | 0.9999 | -1.959848 | 0.0001 | -0.811539 | 0.2676 | -0.250081 | 0.7680 |
| 10744597 | LOC691995  | 0.148169  | 0.9999 | -1.001904 | 0.0199 | -0.409097 | 0.7606 | -0.479948 | 0.3614 |
| 10744862 | Sgsm2      | 0.054979  | 0.9999 | -0.581643 | 0.0335 | -0.437629 | 0.2876 | -0.233401 | 0.5256 |
| 10744888 | Srr        | 0.132579  | 0.9999 | 0.129104  | 0.8839 | 0.220712  | 0.8033 | 0.641319  | 0.0125 |
| 10745095 | Aldoc      | 0.208257  | 0.9999 | -1.663809 | 0.0027 | -0.511987 | 0.7968 | -0.019467 | 0.9900 |
| 10745292 | Lgals9     | -0.176333 | 0.9999 | -0.741800 | 0.0214 | -0.879926 | 0.0158 | -0.594946 | 0.0737 |
| 10745342 | Evi2a      | -0.059330 | 0.9999 | -0.144604 | 0.4643 | -0.110766 | 0.8102 | -0.285170 | 0.0285 |
| 10745387 | Git1       | 0.065810  | 0.9999 | 0.406773  | 0.0301 | 0.137565  | 0.8690 | 0.106473  | 0.7284 |
| 10745509 | Myo1d      | -0.182192 | 0.9999 | 0.577435  | 0.2594 | 0.970234  | 0.0411 | 1.059786  | 0.0109 |
| 10745595 | Slfm8      | -0.080929 | 0.9999 | -0.829702 | 0.0139 | -0.835252 | 0.0310 | -0.811773 | 0.0190 |
| 10745974 | Dhx40      | 0.001215  | 0.9999 | 0.273528  | 0.6669 | 0.337055  | 0.6912 | 0.634709  | 0.0472 |
| 10746000 | Gdpd1      | -0.016353 | 0.9999 | 0.455974  | 0.1320 | 0.368145  | 0.4733 | 0.597254  | 0.0288 |
| 10746139 | Scpep1     | 0.121589  | 0.9999 | -0.629124 | 0.0052 | -0.278345 | 0.5988 | -0.058505 | 0.9072 |
| 10746158 | LOC497978  | 0.195460  | 0.9999 | 0.162062  | 0.8407 | 0.558895  | 0.1062 | 0.804128  | 0.0045 |
| 10746271 | Nme2       | -0.060700 | 0.9999 | -0.062027 | 0.9194 | -0.134440 | 0.7856 | -0.360040 | 0.0179 |
| 10746854 | ---        | 0.143904  | 0.9999 | 0.133784  | 0.8489 | 0.169789  | 0.8704 | 0.500713  | 0.0322 |
| 10746952 | Rpl35a     | -0.168777 | 0.9999 | 0.037486  | 0.9767 | -0.182165 | 0.8704 | -0.847157 | 0.0013 |
| 10747262 | Krt19      | -0.116842 | 0.9999 | -0.973474 | 0.0009 | -0.841471 | 0.0136 | -0.686921 | 0.0254 |
| 10747614 | Usmg5      | -0.088410 | 0.9999 | -0.052580 | 0.9746 | -0.309397 | 0.7013 | -0.615494 | 0.0372 |
| 10747985 | Plcd3      | -0.142661 | 0.9999 | 0.408240  | 0.0415 | 0.211741  | 0.6798 | 0.280507  | 0.1907 |
| 10748195 | Cyb561     | 0.298871  | 0.9999 | -1.094149 | 0.0006 | -0.612221 | 0.1617 | -0.532446 | 0.1221 |
| 10748363 | Smurf2     | -0.012289 | 0.9999 | 0.361015  | 0.1073 | 0.448398  | 0.0721 | 0.460856  | 0.0258 |
| 10749058 | Rps18      | -0.125650 | 0.9999 | -0.026193 | 0.9845 | -0.134737 | 0.9452 | -0.740820 | 0.0095 |
| 10749287 | Ube2o      | 0.258451  | 0.9999 | 0.570041  | 0.0687 | 0.537910  | 0.1899 | 0.608386  | 0.0426 |
| 10749330 | St6galnac2 | 0.163145  | 0.9999 | -1.146093 | 0.0006 | -0.922002 | 0.0163 | -0.441054 | 0.2515 |
| 10749372 | Socs3      | 0.199248  | 0.9999 | -0.972631 | 0.0157 | -0.236654 | 0.9257 | -0.286452 | 0.6408 |
| 10749484 | Timp2      | 0.021145  | 0.9999 | -0.563063 | 0.0157 | -0.505740 | 0.0770 | -0.321183 | 0.2187 |
| 10749495 | Lgals3bp   | -0.114665 | 0.9999 | -0.682395 | 0.0107 | -0.639350 | 0.0430 | -0.394762 | 0.1821 |

|          |              |           |        |           |        |           |        |           |        |
|----------|--------------|-----------|--------|-----------|--------|-----------|--------|-----------|--------|
| 10749822 | Cggbp1       | -0.062971 | 0.9999 | 0.090430  | 0.8658 | 0.139829  | 0.8176 | 0.331616  | 0.0472 |
| 10750310 | Cbr1         | 0.247506  | 0.9999 | 0.260358  | 0.7244 | 0.464587  | 0.4347 | 0.671488  | 0.0435 |
| 10750524 | Mx2          | -0.561098 | 0.9999 | -2.209551 | 0.0003 | -2.311818 | 0.0004 | -1.906897 | 0.0030 |
| 10750688 | RGD1309437   | -0.030745 | 0.9999 | -0.599177 | 0.0144 | -0.440188 | 0.2004 | -0.577580 | 0.0205 |
| 10750731 | Nit2         | 0.018218  | 0.9999 | -0.388827 | 0.0256 | -0.085251 | 0.9438 | 0.070091  | 0.8288 |
| 10750876 | Hmgb2        | -0.064182 | 0.9999 | -0.701365 | 0.0953 | -0.705328 | 0.1873 | -0.814343 | 0.0368 |
| 10751115 | Boc          | 0.340256  | 0.9999 | -0.807191 | 0.0154 | -0.126452 | 0.9562 | 0.269144  | 0.5748 |
| 10751295 | Pla1a        | -0.106995 | 0.9999 | -0.796149 | 0.0380 | -0.442152 | 0.6188 | -0.435500 | 0.3290 |
| 10751445 | LOC100125366 | -0.305370 | 0.9999 | -0.199554 | 0.6339 | -0.239858 | 0.6798 | -0.484153 | 0.0300 |
| 10751469 | ---          | -0.219647 | 0.9999 | -0.749912 | 0.0457 | -0.803812 | 0.0705 | -0.406448 | 0.3583 |
| 10751896 | Cldn1        | -0.025019 | 0.9999 | -0.289646 | 0.0221 | -0.267114 | 0.0893 | -0.267769 | 0.0359 |
| 10751948 | Masp1        | 0.086977  | 0.9999 | -0.518407 | 0.0263 | -0.298274 | 0.5331 | -0.129519 | 0.7398 |
| 10751973 | Rfc4         | -0.066033 | 0.9999 | -0.330369 | 0.6861 | -0.261196 | 0.8948 | -0.823092 | 0.0379 |
| 10752098 | LOC499782    | -0.082277 | 0.9999 | -0.058840 | 0.9388 | -0.137583 | 0.8381 | -0.524693 | 0.0029 |
| 10752146 | Rps15a       | -0.160085 | 0.9999 | 0.132979  | 0.9268 | -0.122285 | 0.9591 | -0.846248 | 0.0163 |
| 10752352 | Prodh        | 0.260360  | 0.9999 | -0.763004 | 0.0185 | -0.231803 | 0.8759 | 0.096627  | 0.8870 |
| 10752630 | Epha3        | 0.327270  | 0.9999 | -1.413950 | 0.0191 | -0.168645 | 0.9698 | 0.376123  | 0.6972 |
| 10752673 | Setd8        | 0.092296  | 0.9999 | 0.191929  | 0.5909 | 0.220043  | 0.6683 | 0.447499  | 0.0259 |
| 10752758 | Btg3         | -0.204207 | 0.9999 | 0.735470  | 0.0185 | 0.500984  | 0.3025 | -0.025331 | 0.9756 |
| 10752852 | Adamts5      | 0.044780  | 0.9999 | -1.053288 | 0.0029 | -0.793549 | 0.0746 | -0.704410 | 0.0586 |
| 10752993 | Hunk         | 0.007386  | 0.9999 | 0.051511  | 0.9514 | 0.258178  | 0.4247 | 0.520511  | 0.0053 |
| 10753075 | Synj1        | 0.206550  | 0.9999 | 0.385490  | 0.2267 | 0.394106  | 0.3676 | 0.605700  | 0.0214 |
| 10754426 | Parp9        | -0.028194 | 0.9999 | -1.027322 | 0.0060 | -0.890437 | 0.0508 | -0.524110 | 0.2233 |
| 10754542 | Ccdc14       | 0.076837  | 0.9999 | -0.004795 | 0.9954 | -0.002773 | 0.9986 | 0.354305  | 0.0435 |
| 10754563 | Itgb5        | -0.195339 | 0.9999 | 0.489005  | 0.0245 | 0.237013  | 0.6769 | 0.204883  | 0.4718 |
| 10754676 | Lmln         | 0.094556  | 0.9999 | 0.327932  | 0.0646 | 0.199653  | 0.6168 | 0.398081  | 0.0201 |
| 10754694 | Rpl35a       | -0.079476 | 0.9999 | 0.052792  | 0.9613 | -0.182410 | 0.8250 | -0.736935 | 0.0013 |
| 10754939 | Fam43a       | 0.201122  | 0.9999 | -0.562192 | 0.0157 | -0.352529 | 0.3708 | -0.386106 | 0.1204 |
| 10754983 | Il13ra1      | 0.098107  | 0.9999 | -0.686900 | 0.0319 | -0.459796 | 0.4009 | -0.093971 | 0.8870 |
| 10755184 | Rpl27a       | -0.112574 | 0.9999 | 0.025694  | 0.9840 | -0.175512 | 0.8844 | -0.584081 | 0.0227 |
| 10755580 | Arvcf        | 0.001711  | 0.9999 | 0.551992  | 0.0116 | 0.304275  | 0.4620 | 0.202820  | 0.4885 |
| 10755822 | Top3b        | 0.009833  | 0.9999 | 0.387498  | 0.0457 | 0.271978  | 0.4098 | 0.193955  | 0.4127 |
| 10755992 | Cdc45l       | -0.045236 | 0.9999 | -0.555775 | 0.1304 | -0.558828 | 0.2470 | -0.673935 | 0.0419 |
| 10756125 | ---          | 0.073611  | 0.9999 | 0.028845  | 0.9720 | 0.110519  | 0.8704 | 0.302323  | 0.0473 |
| 10756229 | Insr         | -0.073257 | 0.9999 | 0.538792  | 0.0265 | 0.463614  | 0.1487 | 0.488065  | 0.0458 |
| 10756418 | Flt1         | -0.117582 | 0.9999 | -0.533522 | 0.0287 | -0.200952 | 0.8258 | -0.307157 | 0.2662 |
| 10757204 | ---          | 0.029202  | 0.9999 | 0.047987  | 0.9670 | 0.104639  | 0.9458 | 0.499871  | 0.0229 |
| 10757258 | RGD1309735   | -0.134411 | 0.9999 | -0.078046 | 0.8987 | -0.203965 | 0.5592 | -0.324011 | 0.0498 |
| 10757986 | Gusb         | 0.096417  | 0.9999 | -0.527548 | 0.0038 | -0.232795 | 0.5765 | -0.251316 | 0.2371 |
| 10758031 | ---          | -0.284174 | 0.9999 | -0.326213 | 0.9207 | -0.884205 | 0.6606 | -1.620029 | 0.0426 |
| 10758137 | Scarb1       | 0.045217  | 0.9999 | -0.476243 | 0.0319 | -0.249157 | 0.6486 | -0.031505 | 0.9537 |
| 10758208 | Ccdc92       | 0.158332  | 0.9999 | 0.420208  | 0.0650 | 0.306594  | 0.4333 | 0.497726  | 0.0227 |
| 10758344 | Vps37b       | 0.024569  | 0.9999 | 0.389956  | 0.0090 | 0.088862  | 0.9231 | 0.030372  | 0.9306 |
| 10758744 | Ptpn11       | 0.081591  | 0.9999 | 0.315659  | 0.0369 | 0.279657  | 0.1604 | 0.085313  | 0.7270 |
| 10758777 | Oas1a        | -0.268817 | 0.9999 | -0.556354 | 0.0128 | -0.598829 | 0.0190 | -0.509437 | 0.0250 |
| 10758991 | Rnf10        | 0.107033  | 0.9999 | 0.389535  | 0.0052 | 0.094135  | 0.8995 | 0.045497  | 0.8774 |
| 10759066 | Git2         | 0.036479  | 0.9999 | 0.133630  | 0.6769 | 0.096594  | 0.9123 | 0.322149  | 0.0419 |

|          |            |           |        |           |        |           |        |           |        |
|----------|------------|-----------|--------|-----------|--------|-----------|--------|-----------|--------|
| 10759173 | Selplg     | -0.071133 | 0.9999 | -0.840283 | 0.0003 | -0.540673 | 0.0477 | -0.553848 | 0.0187 |
| 10759513 | Lass4      | 0.269523  | 0.9999 | -0.920669 | 0.0044 | -0.239708 | 0.8724 | 0.248278  | 0.6151 |
| 10759769 | Pds5b      | 0.147760  | 0.9999 | 0.010662  | 0.9918 | 0.230800  | 0.7442 | 0.478609  | 0.0435 |
| 10759941 | B3galtl    | 0.001401  | 0.9999 | -0.565141 | 0.0194 | -0.278813 | 0.6419 | -0.026319 | 0.9659 |
| 10760018 | Rpl35a     | -0.133997 | 0.9999 | 0.061593  | 0.9563 | -0.171141 | 0.8704 | -0.763715 | 0.0019 |
| 10760196 | Arpc1b     | 0.019580  | 0.9999 | -0.359033 | 0.2218 | -0.254773 | 0.7013 | -0.508956 | 0.0362 |
| 10760208 | Rps15a     | -0.130333 | 0.9999 | 0.153593  | 0.9097 | -0.133156 | 0.9562 | -0.797487 | 0.0221 |
| 10760393 | LOC498145  | 0.150002  | 0.9999 | 0.183156  | 0.5544 | 0.256113  | 0.4326 | 0.560239  | 0.0029 |
| 10760444 | Zfp12      | 0.079490  | 0.9999 | 0.019655  | 0.9832 | 0.263314  | 0.4247 | 0.392839  | 0.0343 |
| 10760557 | RGD1560686 | -0.062920 | 0.9999 | -0.427611 | 0.0180 | -0.268270 | 0.3855 | -0.142836 | 0.5845 |
| 10760559 | ---        | 0.071386  | 0.9999 | -0.590897 | 0.0144 | -0.243484 | 0.7338 | -0.158272 | 0.6796 |
| 10760646 | Mafk       | -0.385051 | 0.9999 | 0.633503  | 0.0328 | 0.449207  | 0.3454 | 0.161637  | 0.7438 |
| 10760738 | Fam20c     | -0.005287 | 0.9999 | -0.326009 | 0.3235 | -0.481837 | 0.1357 | -0.511432 | 0.0400 |
| 10760811 | Rpl31      | -0.057033 | 0.9999 | 0.089617  | 0.9432 | -0.090397 | 0.9624 | -0.708477 | 0.0145 |
| 10760971 | Pcolce     | 0.015227  | 0.9999 | -0.795487 | 0.0020 | -0.407467 | 0.3641 | -0.283374 | 0.3962 |
| 10760994 | Agfg2      | 0.069792  | 0.9999 | 0.101469  | 0.9004 | 0.386772  | 0.1919 | 0.513100  | 0.0187 |
| 10761042 | Ap1s1      | -0.021155 | 0.9999 | 0.166735  | 0.6732 | -0.167379 | 0.8095 | -0.414392 | 0.0341 |
| 10761727 | Setd8      | 0.054069  | 0.9999 | 0.160797  | 0.6082 | 0.169841  | 0.7379 | 0.353332  | 0.0402 |
| 10761758 | Hip1r      | -0.168754 | 0.9999 | 0.825612  | 0.0002 | 0.659675  | 0.0057 | 0.621811  | 0.0062 |
| 10762007 | ---        | -0.052627 | 0.9999 | -0.067807 | 0.8143 | -0.119560 | 0.6522 | -0.216707 | 0.0432 |
| 10762140 | Rps20      | -0.049207 | 0.9999 | -0.033230 | 0.9767 | -0.047470 | 0.9746 | -0.516430 | 0.0173 |
| 10762247 | Oas1b      | -0.322377 | 0.9999 | -0.835133 | 0.0189 | -0.832023 | 0.0482 | -0.830221 | 0.0214 |
| 10762368 | Tbx5       | 0.326345  | 0.9999 | 0.028208  | 0.9831 | 0.103005  | 0.9562 | 0.617505  | 0.0190 |
| 10762442 | Fbxo21     | 0.292603  | 0.9999 | 0.125974  | 0.8095 | 0.153414  | 0.8488 | 0.458109  | 0.0197 |
| 10762593 | Rab35      | 0.114322  | 0.9999 | 0.132248  | 0.5392 | 0.121424  | 0.7606 | 0.273955  | 0.0343 |
| 10762981 | Rpa3       | -0.283930 | 0.9999 | -0.373975 | 0.7008 | -0.461450 | 0.7284 | -1.046295 | 0.0230 |
| 10763021 | Pole       | 0.070679  | 0.9999 | -0.480297 | 0.1515 | -0.460599 | 0.3212 | -0.684995 | 0.0209 |
| 10763135 | ---        | 0.048211  | 0.9999 | 0.197530  | 0.6531 | 0.337208  | 0.3694 | 0.637975  | 0.0060 |
| 10763489 | Clasp1     | 0.017773  | 0.9999 | 0.260358  | 0.4606 | 0.297424  | 0.5289 | 0.537514  | 0.0210 |
| 10763587 | Slc35f5    | -0.166299 | 0.9999 | 0.591639  | 0.0028 | 0.323896  | 0.3141 | 0.138270  | 0.6622 |
| 10763737 | Lsm6       | -0.076321 | 0.9999 | -0.083429 | 0.9371 | -0.334459 | 0.4353 | -0.649930 | 0.0079 |
| 10763976 | Plekha6    | 0.185680  | 0.9999 | -0.469410 | 0.0322 | -0.225628 | 0.7053 | -0.046676 | 0.9236 |
| 10764144 | Kdm5b      | 0.135032  | 0.9999 | 0.038581  | 0.9749 | 0.314061  | 0.4048 | 0.485984  | 0.0259 |
| 10764228 | Phlda3     | -0.019116 | 0.9999 | 0.566033  | 0.0475 | 0.325059  | 0.6234 | 0.150554  | 0.7492 |
| 10764316 | Rpl31      | -0.057843 | 0.9999 | 0.082443  | 0.9415 | -0.076900 | 0.9655 | -0.645165 | 0.0138 |
| 10764643 | RGD1307890 | 0.070222  | 0.9999 | 0.216565  | 0.6181 | 0.253309  | 0.6798 | 0.513514  | 0.0300 |
| 10764811 | RGD1561635 | 0.060010  | 0.9999 | 0.126909  | 0.8462 | -0.076063 | 0.9602 | -0.462818 | 0.0343 |
| 10764827 | Tor1aip2   | -0.033629 | 0.9999 | 0.303406  | 0.6833 | 0.569926  | 0.3133 | 0.747547  | 0.0394 |
| 10765280 | Dpt        | -0.065891 | 0.9999 | -1.347961 | 0.0234 | -0.744046 | 0.5623 | -0.770881 | 0.2524 |
| 10765364 | ---        | -0.795110 | 0.9999 | 1.887343  | 0.0035 | 1.396581  | 0.0934 | 0.613078  | 0.4903 |
| 10765444 | ---        | -0.181735 | 0.9999 | -1.409326 | 0.0217 | -0.963371 | 0.3239 | -1.023442 | 0.1156 |
| 10765480 | Olfml2b    | -0.127807 | 0.9999 | -0.629210 | 0.0264 | -0.391992 | 0.4543 | 0.032442  | 0.9637 |
| 10765625 | Cd244      | -0.132423 | 0.9999 | -0.311405 | 0.0383 | -0.247821 | 0.2541 | -0.272934 | 0.0707 |
| 10765671 | Deaf8      | 0.215972  | 0.9999 | 0.131664  | 0.8686 | 0.361372  | 0.3793 | 0.558316  | 0.0220 |
| 10765996 | Exo1       | 0.104648  | 0.9999 | -0.321980 | 0.1376 | -0.436172 | 0.0575 | -0.447170 | 0.0214 |
| 10766037 | Zfp238     | 0.119613  | 0.9999 | 0.419096  | 0.0401 | 0.230505  | 0.6351 | 0.361380  | 0.0787 |
| 10766080 | Kif26b     | 0.009562  | 0.9999 | -0.393981 | 0.0133 | -0.453736 | 0.0117 | -0.185529 | 0.3317 |



|          |            |           |        |           |        |           |        |           |        |
|----------|------------|-----------|--------|-----------|--------|-----------|--------|-----------|--------|
| 10766082 | Kif26b     | -0.026714 | 0.9999 | -0.569149 | 0.0411 | -0.326567 | 0.5977 | 0.028824  | 0.9668 |
| 10766428 | Tlr5       | 0.026770  | 0.9999 | -0.419793 | 0.0154 | -0.386944 | 0.0673 | -0.452886 | 0.0109 |
| 10766468 | Rab3gap2   | -0.211258 | 0.9999 | 0.819538  | 0.0144 | 0.823331  | 0.0328 | 0.548974  | 0.1264 |
| 10766869 | Cd34       | -0.100351 | 0.9999 | -1.012442 | 0.0203 | -0.717049 | 0.2805 | -0.626777 | 0.1921 |
| 10767098 | Ralb       | -0.061379 | 0.9999 | -0.279098 | 0.2929 | -0.224309 | 0.6683 | -0.433735 | 0.0342 |
| 10767338 | Mcm6       | 0.028932  | 0.9999 | -0.589446 | 0.2115 | -0.647470 | 0.2698 | -0.864324 | 0.0288 |
| 10767539 | Srgap2     | 0.165895  | 0.9999 | 0.489130  | 0.0380 | 0.323822  | 0.4403 | 0.284393  | 0.2870 |
| 10767605 | Cntn2      | 0.090472  | 0.9999 | 0.237435  | 0.6743 | 0.564992  | 0.1067 | 0.572203  | 0.0402 |
| 10767763 | Prelp      | -0.096235 | 0.9999 | -1.432654 | 0.0153 | -1.365601 | 0.0529 | -1.237877 | 0.0384 |
| 10768021 | Pkp1       | -0.044116 | 0.9999 | 1.505903  | 0.0055 | 1.864226  | 0.0018 | 1.247470  | 0.0277 |
| 10768332 | Rgs2       | 0.046614  | 0.9999 | -0.799144 | 0.0279 | -0.873004 | 0.0350 | -0.726319 | 0.0466 |
| 10768857 | Qsox1      | 0.186342  | 0.9999 | -0.600070 | 0.0375 | -0.080655 | 0.9692 | 0.295805  | 0.3982 |
| 10769075 | Fam5b      | 0.147402  | 0.9999 | -0.793017 | 0.0011 | -0.260522 | 0.7053 | -0.025136 | 0.9692 |
| 10769138 | Rabgap11   | 0.156618  | 0.9999 | -0.530588 | 0.0416 | -0.125040 | 0.9438 | -0.070599 | 0.8967 |
| 10769476 | Atp1b1     | 0.095740  | 0.9999 | 0.111960  | 0.6766 | 0.169380  | 0.5289 | 0.272107  | 0.0400 |
| 10769621 | Uck2       | 0.003554  | 0.9999 | 0.372489  | 0.0836 | 0.412862  | 0.1039 | 0.492962  | 0.0167 |
| 10769812 | Pcp4l1     | 0.218680  | 0.9999 | -0.955185 | 0.0260 | -0.569444 | 0.5008 | -0.174112 | 0.8266 |
| 10769954 | Pea15a     | -0.271665 | 0.9999 | 0.871242  | 0.0015 | 0.423233  | 0.3821 | 0.153853  | 0.7500 |
| 10769959 | Casq1      | -0.605092 | 0.9999 | 1.726315  | 0.0008 | 0.722440  | 0.4841 | 0.045544  | 0.9745 |
| 10769998 | Atp1a2     | -0.172864 | 0.9999 | 0.722040  | 0.0380 | 0.546405  | 0.2992 | 0.296557  | 0.5224 |
| 10770082 | Ifi204     | -0.090990 | 0.9999 | -1.061091 | 0.0008 | -1.251269 | 0.0003 | -0.996714 | 0.0030 |
| 10770109 | RGD1562462 | 0.326601  | 0.9999 | -0.714032 | 0.0006 | -0.764786 | 0.0006 | -0.507065 | 0.0192 |
| 10770410 | Rpl36a     | -0.056320 | 0.9999 | 0.006017  | 0.9957 | -0.191090 | 0.8259 | -0.699533 | 0.0032 |
| 10770412 | Enah       | -0.553468 | 0.9999 | 1.092570  | 0.0244 | 0.786777  | 0.2898 | 0.302029  | 0.6965 |
| 10770759 | Sertad4    | 0.228999  | 0.9999 | 0.881304  | 0.0425 | 1.534701  | 0.0005 | 1.275302  | 0.0036 |
| 10770795 | Hsd11b1    | -0.050726 | 0.9999 | -1.770477 | 0.0007 | -1.224168 | 0.0557 | -0.905084 | 0.1103 |
| 10770807 | G0s2       | -0.094814 | 0.9999 | -0.695824 | 0.0241 | -0.708810 | 0.0529 | -0.344035 | 0.3579 |
| 10770996 | Atp5i      | -0.091598 | 0.9999 | -0.133204 | 0.9235 | -0.374050 | 0.6547 | -0.688183 | 0.0405 |
| 10771070 | Tgfbr3     | 0.259886  | 0.9999 | -0.985747 | 0.0042 | -0.259088 | 0.8704 | 0.007971  | 0.9932 |
| 10771210 | Sparc11    | -0.115267 | 0.9999 | -0.697721 | 0.0222 | -0.650591 | 0.0836 | -0.628602 | 0.0419 |
| 10771649 | Cxcl11     | 0.341938  | 0.9999 | -2.217560 | 0.0009 | -0.714557 | 0.7112 | -0.544535 | 0.5864 |
| 10772194 | Hopx       | -0.020278 | 0.9999 | -0.581931 | 0.1328 | -0.753560 | 0.0726 | -0.948935 | 0.0076 |
| 10772405 | Slain2     | -0.062429 | 0.9999 | 0.646358  | 0.0411 | 0.133980  | 0.9491 | -0.220514 | 0.6368 |
| 10772582 | Atp8a1     | 0.276245  | 0.9999 | -0.886427 | 0.0287 | -0.309022 | 0.8557 | 0.237377  | 0.7186 |
| 10772623 | Bend4      | 0.081753  | 0.9999 | 0.546174  | 0.0157 | 0.230097  | 0.7274 | 0.416754  | 0.0755 |
| 10772655 | Rps23      | -0.090437 | 0.9999 | -0.045862 | 0.9788 | -0.184944 | 0.9310 | -0.806271 | 0.0174 |
| 10772699 | RGD1311122 | -0.083623 | 0.9999 | -0.397201 | 0.0234 | -0.173728 | 0.7398 | -0.343338 | 0.0536 |
| 10772705 | Ugdh       | 0.050071  | 0.9999 | -0.660964 | 0.0159 | -0.756268 | 0.0152 | -0.779449 | 0.0064 |
| 10772758 | ---        | -0.194147 | 0.9999 | -0.445078 | 0.1485 | -0.474220 | 0.2193 | -0.659951 | 0.0170 |
| 10772950 | Rpsa       | -0.135407 | 0.9999 | 0.014077  | 0.9877 | -0.258383 | 0.5131 | -0.474570 | 0.0178 |
| 10772965 | ---        | -0.107828 | 0.9999 | -0.170849 | 0.7764 | -0.498818 | 0.0975 | -0.497697 | 0.0402 |
| 10773168 | Hmgb2      | -0.053272 | 0.9999 | -0.687378 | 0.0958 | -0.690608 | 0.1881 | -0.832427 | 0.0305 |
| 10773481 | Mfsd10     | 0.014401  | 0.9999 | -0.266488 | 0.1543 | -0.280994 | 0.2358 | -0.469471 | 0.0053 |
| 10774102 | Rpl13      | -0.038967 | 0.9999 | 0.042917  | 0.9483 | -0.027543 | 0.9781 | -0.304370 | 0.0359 |
| 10774115 | Ramp3      | -0.290643 | 0.9999 | -1.070133 | 0.0028 | -0.802231 | 0.0757 | -0.877660 | 0.0197 |
| 10774359 | Rpl38      | -0.040517 | 0.9999 | 0.017847  | 0.9806 | -0.144447 | 0.7159 | -0.343543 | 0.0170 |
| 10774596 | Bcl11a     | 0.064665  | 0.9999 | 0.576897  | 0.0893 | 0.911316  | 0.0088 | 1.044071  | 0.0015 |

|          |            |           |        |           |        |           |        |           |        |
|----------|------------|-----------|--------|-----------|--------|-----------|--------|-----------|--------|
| 10774638 | Efemp1     | 0.143086  | 0.9999 | -0.935362 | 0.0309 | -1.260772 | 0.0072 | -1.162185 | 0.0082 |
| 10774766 | Rtn4       | 0.034623  | 0.9999 | 0.437377  | 0.0018 | 0.255323  | 0.2163 | 0.032440  | 0.9203 |
| 10774894 | Rpl41      | -0.086660 | 0.9999 | 0.058967  | 0.9603 | -0.102647 | 0.9517 | -0.631407 | 0.0109 |
| 10775001 | Idua       | 0.162176  | 0.9999 | -0.509463 | 0.0380 | -0.103061 | 0.9506 | 0.115527  | 0.7852 |
| 10775141 | Rpap2      | 0.020930  | 0.9999 | 0.197954  | 0.6790 | 0.257440  | 0.6683 | 0.493257  | 0.0355 |
| 10775338 | Pkd2       | 0.168579  | 0.9999 | 0.463164  | 0.1604 | 0.707122  | 0.0303 | 0.403145  | 0.2018 |
| 10775407 | Aff1       | 0.056358  | 0.9999 | 0.362851  | 0.1446 | 0.378367  | 0.2332 | 0.440422  | 0.0472 |
| 10776459 | Pdgfra     | 0.013142  | 0.9999 | -1.872615 | 0.0000 | -1.483744 | 0.0001 | -1.216008 | 0.0012 |
| 10776586 | Slain2     | -0.070464 | 0.9999 | 0.464243  | 0.0235 | 0.237560  | 0.6329 | 0.238896  | 0.3257 |
| 10776915 | Tbc1d1     | 0.030604  | 0.9999 | 0.429707  | 0.0426 | 0.237923  | 0.6410 | 0.234357  | 0.3461 |
| 10777032 | Rpl13      | -0.053810 | 0.9999 | 0.031503  | 0.9680 | -0.050250 | 0.9612 | -0.318497 | 0.0331 |
| 10777108 | Sod3       | 0.223426  | 0.9999 | -0.847355 | 0.0185 | -0.339713 | 0.7616 | -0.205808 | 0.7311 |
| 10777248 | RGD1561042 | 0.115940  | 0.9999 | -0.409017 | 0.0350 | -0.262031 | 0.4627 | -0.116225 | 0.7047 |
| 10777928 | Limk2      | -0.030457 | 0.9999 | 0.058387  | 0.9361 | 0.191106  | 0.6313 | 0.429687  | 0.0104 |
| 10778505 | Grb10      | -0.026891 | 0.9999 | 0.214971  | 0.6141 | 0.357034  | 0.3387 | 0.639918  | 0.0070 |
| 10778555 | Sec61g     | -0.255052 | 0.9999 | -0.071642 | 0.9574 | -0.247873 | 0.7968 | -0.770724 | 0.0074 |
| 10778820 | Ccdc85a    | 0.074470  | 0.9999 | -0.612812 | 0.0237 | -0.434139 | 0.3005 | -0.307469 | 0.3445 |
| 10778853 | Rps27a     | -0.126987 | 0.9999 | 0.072987  | 0.9496 | -0.120060 | 0.9458 | -0.518329 | 0.0402 |
| 10778918 | Rps19      | -0.160834 | 0.9999 | 0.108308  | 0.9171 | -0.134811 | 0.9380 | -0.571920 | 0.0259 |
| 10779317 | Ube2e2     | 0.040537  | 0.9999 | -0.362885 | 0.0646 | -0.252807 | 0.4823 | -0.392532 | 0.0368 |
| 10779602 | RGD1563070 | -0.062761 | 0.9999 | 0.826015  | 0.1178 | 1.133986  | 0.0418 | 1.109377  | 0.0214 |
| 10779673 | Lgals3     | 0.030494  | 0.9999 | -0.160702 | 0.8050 | -0.224800 | 0.7760 | -0.520130 | 0.0343 |
| 10780179 | Abhd4      | 0.108001  | 0.9999 | 0.263685  | 0.4245 | 0.248409  | 0.6673 | 0.523528  | 0.0209 |
| 10780393 | Fitm1      | 0.278331  | 0.9999 | -1.283415 | 0.0012 | -0.436242 | 0.6881 | 0.038305  | 0.9714 |
| 10780396 | Psme1      | 0.089157  | 0.9999 | -0.336013 | 0.0446 | -0.071280 | 0.9482 | 0.118880  | 0.6250 |
| 10780433 | Irf9       | -0.197815 | 0.9999 | -0.797156 | 0.0162 | -0.727211 | 0.0728 | -0.381769 | 0.3395 |
| 10780889 | Mipep      | -0.009088 | 0.9999 | -0.637995 | 0.0100 | -0.484979 | 0.1419 | -0.262116 | 0.4007 |
| 10781197 | Stmn4      | -0.135185 | 0.9999 | 0.715229  | 0.1157 | 1.050753  | 0.0241 | 0.302384  | 0.6226 |
| 10781207 | Adra1a     | -0.046135 | 0.9999 | 0.723761  | 0.0393 | 0.556369  | 0.2898 | 0.432649  | 0.2704 |
| 10781398 | Nudt18     | -0.279277 | 0.9999 | 0.293420  | 0.1786 | 0.523249  | 0.0122 | 0.281053  | 0.1653 |
| 10781554 | Tpt1       | -0.011637 | 0.9999 | 0.046867  | 0.9561 | -0.069367 | 0.9562 | -0.375980 | 0.0368 |
| 10782065 | Ipo5       | -0.044330 | 0.9999 | 0.485420  | 0.0245 | 0.244783  | 0.6502 | 0.089990  | 0.8221 |
| 10782144 | Clybl      | -0.032480 | 0.9999 | -1.078708 | 0.0054 | -0.586301 | 0.3962 | -0.275705 | 0.6531 |
| 10782597 | ---        | -0.005289 | 0.9999 | 0.061469  | 0.9439 | -0.206815 | 0.7016 | -0.471955 | 0.0187 |
| 10782609 | Ptprg      | 0.067753  | 0.9999 | -0.783826 | 0.0035 | -0.536703 | 0.1441 | -0.336891 | 0.2980 |
| 10782695 | Abhd6      | 0.181517  | 0.9999 | 0.408260  | 0.3292 | 0.565719  | 0.1881 | 0.876166  | 0.0064 |
| 10782971 | RGD1304610 | 0.018948  | 0.9999 | 0.065735  | 0.9425 | 0.143259  | 0.8841 | 0.449471  | 0.0314 |
| 10783280 | Chd8       | 0.105403  | 0.9999 | 0.169009  | 0.6649 | 0.162135  | 0.8250 | 0.401712  | 0.0402 |
| 10783353 | Rps19      | -0.170593 | 0.9999 | 0.089603  | 0.9302 | -0.119254 | 0.9433 | -0.512389 | 0.0346 |
| 10783621 | Acin1      | 0.084813  | 0.9999 | 0.287734  | 0.1227 | 0.231476  | 0.4620 | 0.366031  | 0.0307 |
| 10783805 | Psme2      | 0.056987  | 0.9999 | -0.468745 | 0.0128 | -0.278987 | 0.3910 | -0.276098 | 0.1837 |
| 10783849 | Tm9sf1     | 0.034967  | 0.9999 | -0.061360 | 0.9138 | -0.171591 | 0.5935 | -0.284781 | 0.0479 |
| 10783863 | Nedd8      | -0.047155 | 0.9999 | 0.033697  | 0.9795 | -0.219165 | 0.8033 | -0.548668 | 0.0299 |
| 10784360 | Kpna3      | 0.080819  | 0.9999 | 0.169538  | 0.7530 | 0.239491  | 0.7009 | 0.460308  | 0.0448 |
| 10784517 | Msra       | -0.049073 | 0.9999 | -0.586402 | 0.0295 | -0.478101 | 0.1983 | -0.451053 | 0.1088 |
| 10784843 | ---        | -0.246145 | 0.9999 | -0.297525 | 0.0144 | -0.168050 | 0.4665 | -0.156083 | 0.2630 |
| 10784896 | Slc25a37   | -0.048892 | 0.9999 | 0.634304  | 0.0030 | 0.270815  | 0.5846 | 0.222183  | 0.4300 |

|          |            |           |        |           |        |           |        |           |        |
|----------|------------|-----------|--------|-----------|--------|-----------|--------|-----------|--------|
| 10784980 | Sorbs3     | 0.094453  | 0.9999 | -0.461986 | 0.0110 | -0.431153 | 0.0458 | -0.216104 | 0.3181 |
| 10785244 | Itm2b      | 0.212957  | 0.9999 | -0.385383 | 0.0228 | -0.108793 | 0.9033 | 0.060587  | 0.8556 |
| 10785326 | Slc25a30   | -0.016364 | 0.9999 | 0.165866  | 0.9122 | 0.328060  | 0.8070 | 0.828325  | 0.0303 |
| 10785933 | Rps7       | -0.041400 | 0.9999 | -0.007953 | 0.9898 | -0.062647 | 0.9484 | -0.330697 | 0.0222 |
| 10786132 | Rps24      | -0.127744 | 0.9999 | 0.105756  | 0.9036 | -0.057633 | 0.9732 | -0.491920 | 0.0341 |
| 10786401 | Wnt5a      | 0.049280  | 0.9999 | -1.277804 | 0.0003 | -0.627368 | 0.2222 | -0.382918 | 0.3897 |
| 10786537 | Itih4      | 0.179101  | 0.9999 | -1.001363 | 0.0013 | -0.474740 | 0.3842 | -0.183952 | 0.7284 |
| 10786717 | ---        | 0.081320  | 0.9999 | -0.573964 | 0.0144 | -0.362698 | 0.3457 | -0.331184 | 0.2040 |
| 10786836 | RGD1310423 | -0.008235 | 0.9999 | -0.554926 | 0.0237 | -0.555092 | 0.0575 | -0.377992 | 0.1527 |
| 10787150 | Calr3      | 0.136785  | 0.9999 | 0.048881  | 0.9403 | 0.216890  | 0.3875 | 0.326742  | 0.0277 |
| 10787364 | Jak3       | 0.078123  | 0.9999 | -0.524949 | 0.0403 | -0.228996 | 0.7781 | -0.012871 | 0.9853 |
| 10787517 | Gdf15      | -0.184819 | 0.9999 | 2.032836  | 0.0001 | 1.336765  | 0.0239 | 0.575395  | 0.3659 |
| 10787520 | Ssbp4      | 0.123965  | 0.9999 | -0.294152 | 0.0219 | -0.026297 | 0.9773 | 0.263256  | 0.0426 |
| 10787611 | Slc25a42   | 0.179795  | 0.9999 | 0.203680  | 0.7665 | 0.425549  | 0.3572 | 0.727313  | 0.0109 |
| 10787731 | Tceb1      | -0.023267 | 0.9999 | 0.001690  | 0.9991 | -0.125083 | 0.9179 | -0.442595 | 0.0343 |
| 10787757 | Csgalnact1 | -0.161259 | 0.9999 | -0.954360 | 0.0132 | -0.683713 | 0.2153 | -0.754495 | 0.0560 |
| 10787784 | Hmgb2      | -0.038906 | 0.9999 | -0.631466 | 0.0889 | -0.661098 | 0.1487 | -0.735414 | 0.0341 |
| 10787792 | RGD1305222 | 0.111147  | 0.9999 | 0.319535  | 0.0099 | 0.118722  | 0.7606 | -0.054192 | 0.8135 |
| 10787889 | Ddx60      | -0.135630 | 0.9999 | -0.319436 | 0.0310 | -0.277080 | 0.1594 | -0.248618 | 0.1068 |
| 10787935 | Clcn3      | 0.085880  | 0.9999 | 0.393299  | 0.2178 | 0.444411  | 0.2530 | 0.659810  | 0.0138 |
| 10787960 | Hmgn2      | -0.015825 | 0.9999 | -0.838642 | 0.0102 | -0.770794 | 0.0482 | -0.912323 | 0.0074 |
| 10788427 | Msr1       | -0.098756 | 0.9999 | -0.752322 | 0.0030 | -0.414907 | 0.3159 | -0.454461 | 0.0979 |
| 10788453 | ---        | -0.008608 | 0.9999 | -0.583823 | 0.0245 | -0.390861 | 0.3681 | -0.257896 | 0.4358 |
| 10788462 | Dlc1       | 0.148699  | 0.9999 | -0.904588 | 0.0004 | -0.520795 | 0.1183 | -0.191955 | 0.6209 |
| 10788510 | Tnks       | 0.106227  | 0.9999 | 0.027993  | 0.9786 | 0.206041  | 0.7187 | 0.408908  | 0.0448 |
| 10788666 | Rps20      | -0.066547 | 0.9999 | -0.033917 | 0.9786 | -0.100453 | 0.9527 | -0.625783 | 0.0111 |
| 10789386 | LOC498662  | 0.061740  | 0.9999 | 0.450992  | 0.0185 | 0.204370  | 0.6933 | 0.217539  | 0.3472 |
| 10789401 | Rasa3      | -0.037584 | 0.9999 | -0.397817 | 0.0448 | -0.185840 | 0.7536 | -0.277728 | 0.1885 |
| 10789477 | Adprhl1    | -0.542700 | 0.9999 | 0.785779  | 0.0084 | 0.424680  | 0.4439 | 0.269235  | 0.5107 |
| 10789502 | Grtp1      | -0.553733 | 0.9999 | 1.074684  | 0.0154 | 0.563809  | 0.5519 | 0.109912  | 0.9089 |
| 10789504 | Grtp1      | -0.018279 | 0.9999 | 0.375272  | 0.0030 | 0.192884  | 0.3910 | 0.091024  | 0.6489 |
| 10789709 | Polr3a     | 0.018163  | 0.9999 | 0.331731  | 0.1954 | 0.338567  | 0.3197 | 0.535174  | 0.0151 |
| 10789727 | Zcchc24    | 0.230328  | 0.9999 | -0.574128 | 0.0310 | -0.363099 | 0.4620 | 0.035711  | 0.9562 |
| 10790257 | Hacl1      | -0.015344 | 0.9999 | -0.579664 | 0.0115 | -0.306097 | 0.5070 | -0.326438 | 0.2001 |
| 10790305 | Dph3       | -0.165809 | 0.9999 | 0.029086  | 0.9828 | -0.208999 | 0.8227 | -0.774350 | 0.0029 |
| 10790309 | Timm23     | -0.056480 | 0.9999 | 0.064860  | 0.9162 | -0.120807 | 0.8479 | -0.320301 | 0.0356 |
| 10790355 | RGD1564899 | 0.153805  | 0.9999 | 0.247124  | 0.6743 | 0.230768  | 0.8452 | 0.588063  | 0.0431 |
| 10790360 | RGD1564899 | 0.144011  | 0.9999 | 0.239605  | 0.7406 | 0.243835  | 0.8520 | 0.647692  | 0.0404 |
| 10790471 | Sncg       | -0.213919 | 0.9999 | 0.448346  | 0.0150 | -0.279875 | 0.3676 | -0.407347 | 0.0300 |
| 10790525 | Rpl38      | -0.040517 | 0.9999 | 0.017847  | 0.9806 | -0.144447 | 0.7159 | -0.343543 | 0.0170 |
| 10790542 | Gcap14     | -0.052255 | 0.9999 | 0.460992  | 0.1097 | 0.443434  | 0.2530 | 0.559312  | 0.0342 |
| 10790804 | Plvap      | -0.206687 | 0.9999 | -0.465269 | 0.0762 | -0.609981 | 0.0301 | -0.591234 | 0.0187 |
| 10790948 | Jund       | 0.021173  | 0.9999 | 0.571139  | 0.0468 | 0.334315  | 0.5977 | 0.231071  | 0.5548 |
| 10790966 | Isyna1     | 0.175564  | 0.9999 | -0.023576 | 0.9896 | 0.816239  | 0.0915 | 1.195889  | 0.0030 |
| 10791000 | Crlf1      | 0.215142  | 0.9999 | 0.135108  | 0.9140 | 0.749181  | 0.0400 | 0.282985  | 0.4996 |
| 10791202 | Tceb1      | -0.049340 | 0.9999 | 0.012289  | 0.9898 | -0.139325 | 0.9033 | -0.454451 | 0.0368 |
| 10791204 | Tceb1      | -0.048137 | 0.9999 | 0.001820  | 0.9991 | -0.134580 | 0.9210 | -0.478042 | 0.0368 |

|          |            |           |        |           |        |           |        |           |        |
|----------|------------|-----------|--------|-----------|--------|-----------|--------|-----------|--------|
| 10791358 | Ddx60      | -0.151373 | 0.9999 | -0.419415 | 0.0056 | -0.344167 | 0.0705 | -0.225124 | 0.1882 |
| 10791456 | ---        | 0.107009  | 0.9999 | 0.388900  | 0.1833 | 0.401906  | 0.2905 | 0.521375  | 0.0368 |
| 10791522 | Hpgd       | 0.066052  | 0.9999 | -0.398036 | 0.0219 | -0.319422 | 0.1815 | -0.301003 | 0.0979 |
| 10791740 | Pdlim3     | -0.291094 | 0.9999 | 0.545312  | 0.1833 | 0.764634  | 0.0717 | 0.809152  | 0.0214 |
| 10791966 | Tusc3      | -0.086384 | 0.9999 | -0.508609 | 0.0687 | -0.496430 | 0.1668 | -0.650259 | 0.0166 |
| 10792101 | Purg       | 0.107054  | 0.9999 | 0.260397  | 0.4345 | 0.333866  | 0.3811 | 0.484555  | 0.0320 |
| 10792621 | Myom2      | 0.004554  | 0.9999 | -1.552711 | 0.0188 | -1.755358 | 0.0194 | -1.558523 | 0.0205 |
| 10792660 | Kbtbd11    | 0.533815  | 0.9999 | -0.870463 | 0.0426 | -0.214127 | 0.9423 | -0.071643 | 0.9440 |
| 10793458 | Ctsl1      | 0.083260  | 0.9999 | -0.324150 | 0.4435 | -0.351820 | 0.5639 | -0.604929 | 0.0334 |
| 10793597 | ---        | 0.094954  | 0.9999 | -0.630025 | 0.0406 | -0.436160 | 0.4056 | -0.096531 | 0.8752 |
| 10793600 | ---        | 0.103227  | 0.9999 | -0.625164 | 0.0255 | -0.417893 | 0.3771 | -0.084737 | 0.8843 |
| 10793675 | Ctla2a     | 0.228594  | 0.9999 | -1.778177 | 0.0007 | -1.176550 | 0.0757 | -1.150792 | 0.0350 |
| 10794016 | Pdlim7     | -0.140204 | 0.9999 | 0.691486  | 0.0100 | 0.474247  | 0.2222 | -0.073242 | 0.9006 |
| 10794599 | Nedd9      | -0.029766 | 0.9999 | 0.724880  | 0.0367 | 0.845865  | 0.0286 | 0.992469  | 0.0045 |
| 10794800 | RGD1311307 | -0.393083 | 0.9999 | 1.374107  | 0.0008 | 1.076975  | 0.0239 | 0.372760  | 0.5115 |
| 10795105 | Rpl37      | -0.084167 | 0.9999 | -0.015317 | 0.9898 | -0.127010 | 0.9467 | -0.660704 | 0.0190 |
| 10795189 | Hist1h2bh  | -0.125067 | 0.9999 | -0.317467 | 0.4724 | -0.380494 | 0.5008 | -0.611031 | 0.0341 |
| 10795194 | ---        | 0.022407  | 0.9999 | -0.383467 | 0.0475 | -0.328180 | 0.2209 | -0.275028 | 0.1812 |
| 10795196 | RGD1564767 | -0.094783 | 0.9999 | -0.746485 | 0.1674 | -0.704881 | 0.3676 | -0.967889 | 0.0398 |
| 10795198 | ---        | -0.100722 | 0.9999 | -0.770417 | 0.3651 | -0.895852 | 0.3957 | -1.221868 | 0.0491 |
| 10795203 | Hist1h1a   | -0.084601 | 0.9999 | -1.203793 | 0.0204 | -1.197494 | 0.0529 | -1.450330 | 0.0070 |
| 10795231 | Hist1h2bl  | -0.187053 | 0.9999 | -0.608801 | 0.2419 | -0.597218 | 0.4270 | -0.890585 | 0.0349 |
| 10795265 | LOC682649  | 0.006103  | 0.9999 | -0.540080 | 0.1256 | -0.578238 | 0.1844 | -0.766871 | 0.0177 |
| 10795280 | ---        | -0.067617 | 0.9999 | -0.566924 | 0.1805 | -0.633131 | 0.2176 | -0.943902 | 0.0104 |
| 10795286 | ---        | -0.039556 | 0.9999 | -0.251220 | 0.4006 | -0.296079 | 0.4247 | -0.413641 | 0.0499 |
| 10795291 | Hist1h1b   | -0.000486 | 0.9999 | -1.034595 | 0.0545 | -1.038625 | 0.1173 | -1.118244 | 0.0321 |
| 10795295 | ---        | -0.223551 | 0.9999 | -0.899722 | 0.0475 | -0.801097 | 0.1872 | -1.011124 | 0.0227 |
| 10795297 | Hist1h4b   | -0.117780 | 0.9999 | -0.609090 | 0.1144 | -0.655827 | 0.1667 | -0.929972 | 0.0096 |
| 10795319 | Zfp187     | -0.003902 | 0.9999 | 0.185365  | 0.7322 | 0.251192  | 0.7013 | 0.499108  | 0.0375 |
| 10795546 | Rps19      | -0.168423 | 0.9999 | 0.084723  | 0.9455 | -0.166573 | 0.9167 | -0.556797 | 0.0461 |
| 10795760 | Mtr        | -0.031199 | 0.9999 | 0.199230  | 0.7123 | 0.365391  | 0.3890 | 0.529845  | 0.0341 |
| 10796074 | Net1       | 0.472366  | 0.9999 | -1.445871 | 0.0020 | -0.781119 | 0.3029 | -0.470712 | 0.4569 |
| 10796347 | Mcm10      | -0.040477 | 0.9999 | -0.472529 | 0.0475 | -0.581611 | 0.0263 | -0.492957 | 0.0342 |
| 10796416 | Rpl34      | -0.051900 | 0.9999 | 0.023340  | 0.9767 | -0.067877 | 0.9493 | -0.366810 | 0.0208 |
| 10796476 | Mrc1       | 0.260824  | 0.9999 | -0.904110 | 0.0082 | -0.356218 | 0.7177 | -0.445503 | 0.2611 |
| 10796677 | Rpl37      | -0.079783 | 0.9999 | 0.001467  | 0.9991 | -0.115620 | 0.9105 | -0.446360 | 0.0179 |
| 10796679 | ---        | 0.110430  | 0.9999 | -0.749446 | 0.0298 | -0.278747 | 0.8370 | 0.318751  | 0.4774 |
| 10796838 | Irx4       | 0.087561  | 0.9999 | -0.952866 | 0.0030 | -0.667415 | 0.1173 | -0.212608 | 0.6846 |
| 10796900 | RGD1566325 | 0.211662  | 0.9999 | 0.308170  | 0.6656 | 0.360082  | 0.7261 | 0.715083  | 0.0467 |
| 10797169 | Rplp1      | -0.036003 | 0.9999 | -0.017897 | 0.9764 | -0.121813 | 0.6518 | -0.228957 | 0.0343 |
| 10797473 | Rpl35a     | -0.124971 | 0.9999 | 0.069106  | 0.9468 | -0.168184 | 0.8690 | -0.746074 | 0.0015 |
| 10797493 | RGD1306917 | -0.153581 | 0.9999 | -0.095209 | 0.8983 | -0.136752 | 0.8841 | -0.447027 | 0.0250 |
| 10797566 | S1pr3      | 0.120065  | 0.9999 | -1.047238 | 0.0194 | -0.497347 | 0.6683 | -0.604997 | 0.2323 |
| 10797741 | Aof1       | 0.249374  | 0.9999 | 0.247172  | 0.5086 | 0.366438  | 0.3141 | 0.556606  | 0.0185 |
| 10798218 | Rpl37      | -0.037277 | 0.9999 | 0.028963  | 0.9832 | -0.105167 | 0.9562 | -0.632708 | 0.0227 |
| 10798436 | Hist1h2aa  | 0.013910  | 0.9999 | -0.378079 | 0.1504 | -0.394179 | 0.2438 | -0.502578 | 0.0308 |
| 10798442 | LOC679840  | -0.218349 | 0.9999 | -0.590660 | 0.2005 | -0.667598 | 0.2314 | -0.973360 | 0.0135 |

|          |                    |           |        |           |        |           |        |           |        |
|----------|--------------------|-----------|--------|-----------|--------|-----------|--------|-----------|--------|
| 10798455 | Hist1h2ail         | -0.025487 | 0.9999 | -0.629377 | 0.0965 | -0.635538 | 0.1872 | -0.810253 | 0.0214 |
| 10798457 | ---                | -0.103678 | 0.9999 | -0.824132 | 0.2039 | -0.784601 | 0.4075 | -1.171785 | 0.0321 |
| 10798461 | Hist1h4b           | -0.101514 | 0.9999 | -0.538119 | 0.1870 | -0.612422 | 0.2094 | -0.925933 | 0.0090 |
| 10798465 | ---                | -0.421169 | 0.9999 | -0.705528 | 0.1674 | -0.736226 | 0.2610 | -0.914079 | 0.0399 |
| 10798488 | Hist1h2bc          | -0.077867 | 0.9999 | -0.760398 | 0.0625 | -0.685180 | 0.2163 | -0.917871 | 0.0201 |
| 10798490 | Hist1h4b           | -0.078507 | 0.9999 | -0.598290 | 0.1157 | -0.623279 | 0.1902 | -0.912958 | 0.0098 |
| 10798492 | ---                | 0.026902  | 0.9999 | -0.550943 | 0.1090 | -0.533732 | 0.2470 | -0.767013 | 0.0167 |
| 10798494 | st1h2bn // Hist1h2 | -0.072616 | 0.9999 | -0.696292 | 0.0809 | -0.611305 | 0.2799 | -0.855961 | 0.0227 |
| 10798497 | Hist1h2bl          | -0.062527 | 0.9999 | -0.756197 | 0.0600 | -0.688322 | 0.1992 | -0.904434 | 0.0204 |
| 10798499 | Hist1h4b           | -0.103831 | 0.9999 | -0.638656 | 0.1057 | -0.645186 | 0.2004 | -0.916485 | 0.0128 |
| 10798501 | Hist1h2bm          | -0.022014 | 0.9999 | -0.287486 | 0.3765 | -0.423790 | 0.1822 | -0.597982 | 0.0111 |
| 10798507 | Hist1h2ak          | -0.141704 | 0.9999 | -0.972329 | 0.0520 | -0.913482 | 0.1590 | -1.131205 | 0.0205 |
| 10798794 | Svil               | -0.141322 | 0.9999 | 0.742002  | 0.0203 | 0.546888  | 0.2470 | 0.706770  | 0.0299 |
| 10798828 | RGD1562037         | -0.144024 | 0.9999 | 0.170956  | 0.8588 | 0.410363  | 0.4885 | 0.632097  | 0.0400 |
| 10798900 | ---                | -0.098769 | 0.9999 | -0.029676 | 0.9828 | -0.142511 | 0.9360 | -0.571124 | 0.0321 |
| 10799357 | Akr1cl1            | 0.416938  | 0.9999 | -0.902168 | 0.0358 | -0.690807 | 0.2786 | -0.808333 | 0.0590 |
| 10799968 | Prtfdc1            | -0.077679 | 0.9999 | -0.590348 | 0.0126 | -0.310818 | 0.5244 | -0.180222 | 0.6074 |
| 10799985 | Rps8               | -0.051923 | 0.9999 | 0.038257  | 0.9673 | -0.012130 | 0.9949 | -0.415125 | 0.0193 |
| 10800657 | Ammecr11           | 0.029739  | 0.9999 | 0.346800  | 0.1627 | 0.248524  | 0.6371 | 0.435748  | 0.0449 |
| 10800696 | Lims2              | -0.217777 | 0.9999 | -0.202217 | 0.8783 | -1.003947 | 0.0217 | -0.715386 | 0.0723 |
| 10800913 | ---                | 0.066524  | 0.9999 | 0.332678  | 0.1106 | 0.269458  | 0.4279 | 0.415526  | 0.0305 |
| 10802040 | Pdgfrb             | 0.018148  | 0.9999 | -0.807206 | 0.0306 | -0.252547 | 0.8866 | -0.185461 | 0.7730 |
| 10802128 | Rps23              | -0.065927 | 0.9999 | -0.047823 | 0.9767 | -0.167257 | 0.9360 | -0.770791 | 0.0150 |
| 10802274 | Malt1              | -0.033034 | 0.9999 | 0.331999  | 0.5847 | 0.579292  | 0.2497 | 0.706597  | 0.0402 |
| 10802700 | Rpl17              | -0.052967 | 0.9999 | 0.053507  | 0.9311 | -0.030050 | 0.9772 | -0.296040 | 0.0435 |
| 10802782 | Pias2              | 0.190004  | 0.9999 | 0.075757  | 0.9236 | 0.108323  | 0.9278 | 0.398245  | 0.0379 |
| 10803017 | Cyb5a              | 0.111557  | 0.9999 | -0.647499 | 0.0403 | -0.520559 | 0.2530 | -0.740781 | 0.0185 |
| 10803394 | B4galt6            | 0.132185  | 0.9999 | -0.350684 | 0.0260 | -0.096068 | 0.9139 | -0.040302 | 0.9058 |
| 10803440 | ---                | -0.075914 | 0.9999 | 0.542273  | 0.0464 | 0.344172  | 0.5250 | 0.290687  | 0.3681 |
| 10803666 | Gypc               | 0.369851  | 0.9999 | -0.542187 | 0.0278 | -0.277137 | 0.6510 | -0.153975 | 0.6917 |
| 10803692 | Nrep               | 0.108762  | 0.9999 | -0.101816 | 0.9388 | 0.727088  | 0.0301 | 0.876653  | 0.0038 |
| 10803911 | Dnajc18            | 0.043108  | 0.9999 | 0.238812  | 0.4125 | 0.200663  | 0.7335 | 0.409949  | 0.0428 |
| 10803947 | Hbegf              | -0.644752 | 0.9999 | 1.483264  | 0.0144 | 1.334977  | 0.0721 | 0.730711  | 0.3067 |
| 10803995 | Ndufa2             | -0.139452 | 0.9999 | -0.117146 | 0.9213 | -0.218553 | 0.8610 | -0.583974 | 0.0449 |
| 10804225 | Ppp2r2b            | -0.170967 | 0.9999 | -1.581173 | 0.0005 | -1.479268 | 0.0026 | -1.089092 | 0.0200 |
| 10804384 | Fem1c              | 0.019369  | 0.9999 | 0.132340  | 0.7631 | 0.118955  | 0.8965 | 0.359285  | 0.0500 |
| 10804463 | Lox                | -0.113743 | 0.9999 | 0.895442  | 0.1318 | 1.501330  | 0.0117 | 1.084997  | 0.0427 |
| 10804480 | Ppic               | -0.044829 | 0.9999 | -0.663875 | 0.0053 | -0.320113 | 0.5256 | -0.354233 | 0.1890 |
| 10804721 | Afap111            | 0.187871  | 0.9999 | 0.431844  | 0.0953 | 0.447953  | 0.1663 | 0.608861  | 0.0123 |
| 10804974 | Afg3l2             | 0.055691  | 0.9999 | 0.467842  | 0.0287 | 0.277385  | 0.5203 | 0.309531  | 0.1824 |
| 10805016 | Cep76              | 0.046398  | 0.9999 | 0.399405  | 0.1734 | 0.458361  | 0.1873 | 0.698785  | 0.0071 |
| 10805263 | ---                | 0.018099  | 0.9999 | 0.301059  | 0.0344 | 0.077749  | 0.9311 | -0.006839 | 0.9860 |
| 10806303 | Tox3               | -0.127649 | 0.9999 | 1.074456  | 0.0005 | 0.561347  | 0.1963 | 0.562106  | 0.0827 |
| 10806416 | Itfg1              | 0.058348  | 0.9999 | -0.558623 | 0.0018 | -0.337571 | 0.1873 | -0.098084 | 0.7577 |
| 10806687 | Ccdc130            | 0.049773  | 0.9999 | 0.231700  | 0.4947 | 0.191832  | 0.7913 | 0.471987  | 0.0288 |
| 10806927 | Gab1               | 0.113811  | 0.9999 | 0.437064  | 0.1063 | 0.338415  | 0.4690 | 0.626896  | 0.0128 |
| 10807007 | Slc10a7            | 0.076078  | 0.9999 | -0.488487 | 0.0118 | -0.230530 | 0.6187 | -0.106289 | 0.7492 |

|          |          |           |        |           |        |           |        |           |        |
|----------|----------|-----------|--------|-----------|--------|-----------|--------|-----------|--------|
| 10807044 | Arhgap10 | 0.019861  | 0.9999 | -0.421840 | 0.0161 | -0.467347 | 0.0194 | -0.274156 | 0.1490 |
| 10807452 | Nfatc3   | 0.093612  | 0.9999 | 0.186502  | 0.6948 | 0.222910  | 0.7428 | 0.480591  | 0.0343 |
| 10807514 | Rps12    | -0.130700 | 0.9999 | 0.038950  | 0.9817 | -0.112417 | 0.9595 | -0.712498 | 0.0276 |
| 10807828 | Znf23    | 0.004868  | 0.9999 | 0.060738  | 0.9673 | 0.383729  | 0.4620 | 0.697356  | 0.0138 |
| 10808034 | St3gal2  | -0.067064 | 0.9999 | 0.430084  | 0.0674 | 0.543134  | 0.0335 | 0.664944  | 0.0038 |
| 10808274 | Cdh13    | -0.000740 | 0.9999 | -0.847715 | 0.0323 | -0.230791 | 0.9210 | -0.079383 | 0.9288 |
| 10808302 | Osgin1   | 0.073310  | 0.9999 | 0.527920  | 0.0403 | 0.147769  | 0.9229 | 0.150719  | 0.7131 |
| 10808348 | Wfdc1    | -0.233779 | 0.9999 | 0.215530  | 0.8760 | 0.563380  | 0.4610 | 0.862293  | 0.0350 |
| 10808377 | Crispld2 | 0.005416  | 0.9999 | 0.401359  | 0.5362 | 0.714609  | 0.1802 | 1.043796  | 0.0089 |
| 10808553 | Acsf3    | 0.057477  | 0.9999 | -0.568192 | 0.0071 | -0.397193 | 0.1802 | -0.314932 | 0.1836 |
| 10808620 | Dpep1    | 0.051434  | 0.9999 | -0.813838 | 0.0323 | -0.559457 | 0.3811 | -0.665855 | 0.0871 |
| 10808637 | Cdk10    | -0.078893 | 0.9999 | 0.472497  | 0.0138 | 0.319539  | 0.2698 | 0.194488  | 0.4274 |
| 10808708 | Def8     | 0.093812  | 0.9999 | 0.448882  | 0.0109 | 0.308650  | 0.2265 | 0.270242  | 0.1616 |
| 10808774 | Galnt2   | 0.188774  | 0.9999 | -0.543393 | 0.0356 | 0.039157  | 0.9846 | 0.205166  | 0.5691 |
| 10808959 | Nrp1     | -0.046451 | 0.9999 | -0.680752 | 0.0077 | -0.519492 | 0.1200 | -0.022575 | 0.9742 |
| 10809018 | Cmtm3    | 0.013560  | 0.9999 | -0.582227 | 0.0185 | -0.276391 | 0.6625 | -0.524326 | 0.0357 |
| 10809100 | Ndrp4    | 0.122086  | 0.9999 | 0.088681  | 0.9012 | 0.170483  | 0.7856 | 0.411430  | 0.0308 |
| 10809278 | Arl2bp   | 0.089677  | 0.9999 | -0.364061 | 0.0190 | -0.378123 | 0.0342 | -0.312883 | 0.0472 |
| 10809328 | Herpud1  | 0.000428  | 0.9999 | 0.504542  | 0.0958 | 0.578858  | 0.0975 | 0.977066  | 0.0010 |
| 10809392 | Mt1a     | 0.070674  | 0.9999 | -1.123168 | 0.0410 | -0.675044 | 0.5557 | -0.412456 | 0.6004 |
| 10809399 | Mt2A     | 0.003174  | 0.9999 | -1.090031 | 0.0399 | -1.076934 | 0.0963 | -0.958033 | 0.0719 |
| 10809428 | Gnao1    | -0.081508 | 0.9999 | -0.568657 | 0.1443 | -0.870739 | 0.0248 | -0.686850 | 0.0486 |
| 10809824 | Gpt2     | 0.138274  | 0.9999 | 0.350231  | 0.3314 | 0.500233  | 0.1692 | 0.674252  | 0.0136 |
| 10809856 | Orc6l    | -0.083405 | 0.9999 | -0.243891 | 0.6658 | -0.233401 | 0.8259 | -0.609927 | 0.0317 |
| 10809912 | Man2b1   | 0.074787  | 0.9999 | -0.434474 | 0.0050 | -0.245927 | 0.3437 | -0.116013 | 0.6263 |
| 10810029 | Dnase2a  | -0.064648 | 0.9999 | -0.371895 | 0.0411 | -0.046012 | 0.9717 | 0.002951  | 0.9953 |
| 10810493 | Lsm6     | 0.008056  | 0.9999 | -0.002480 | 0.9981 | -0.258014 | 0.6547 | -0.569044 | 0.0156 |
| 10810503 | Slc10a7  | 0.084180  | 0.9999 | -0.374062 | 0.0185 | -0.144093 | 0.7851 | -0.023600 | 0.9524 |
| 10810553 | B3gnt9   | 0.096528  | 0.9999 | -0.764898 | 0.0007 | -0.411139 | 0.2050 | -0.532415 | 0.0222 |
| 10810591 | Fhod1    | 0.261275  | 0.9999 | 0.418612  | 0.0377 | 0.460398  | 0.0476 | 0.265837  | 0.2282 |
| 10810727 | Psmb10   | -0.121368 | 0.9999 | -0.500422 | 0.0060 | -0.342111 | 0.1871 | -0.709848 | 0.0005 |
| 10810743 | Slc12a4  | -0.039621 | 0.9999 | 0.519969  | 0.0051 | 0.424280  | 0.0674 | 0.385984  | 0.0461 |
| 10811160 | Ldhd     | 0.202071  | 0.9999 | -0.199257 | 0.3130 | 0.148331  | 0.7362 | 0.354194  | 0.0192 |
| 10811293 | Gesh     | -0.061968 | 0.9999 | -0.156252 | 0.5400 | -0.259076 | 0.2470 | -0.303258 | 0.0498 |
| 10811651 | Aprt     | 0.045751  | 0.9999 | -0.373230 | 0.0125 | -0.269138 | 0.2006 | -0.159637 | 0.3931 |
| 10811663 | Galns    | 0.025251  | 0.9999 | -0.684506 | 0.0180 | -0.439497 | 0.3626 | -0.118224 | 0.8265 |
| 10811708 | Ankrd11  | 0.116179  | 0.9999 | 0.332071  | 0.0524 | 0.377472  | 0.0529 | 0.394671  | 0.0189 |
| 10811747 | Spata2L  | -0.023030 | 0.9999 | 0.742036  | 0.0013 | 0.511007  | 0.0774 | 0.245836  | 0.4084 |
| 10811768 | Fanca    | -0.032148 | 0.9999 | -0.330071 | 0.0600 | -0.246062 | 0.3929 | -0.334496 | 0.0497 |
| 10812315 | Fam172a  | 0.093986  | 0.9999 | -0.791835 | 0.0154 | -0.364685 | 0.6661 | -0.151979 | 0.7966 |
| 10812416 | Rps23    | -0.069290 | 0.9999 | -0.041387 | 0.9795 | -0.148557 | 0.9443 | -0.717604 | 0.0197 |
| 10812456 | Dhfr     | -0.110516 | 0.9999 | -0.510418 | 0.0560 | -0.672733 | 0.0204 | -0.625199 | 0.0170 |
| 10812515 | Arsb     | 0.119334  | 0.9999 | -0.879666 | 0.0006 | -0.500839 | 0.1520 | -0.424752 | 0.1283 |
| 10812524 | Arsb     | 0.120007  | 0.9999 | -0.916975 | 0.0032 | -0.571825 | 0.2067 | -0.687030 | 0.0341 |
| 10812834 | Adamts6  | 0.079789  | 0.9999 | 0.399778  | 0.4337 | 0.746975  | 0.0728 | 0.719244  | 0.0372 |
| 10812943 | Pde4d    | 0.037659  | 0.9999 | -0.086034 | 0.9536 | 0.511926  | 0.2905 | 0.798586  | 0.0132 |
| 10813029 | Slc38a9  | 0.036972  | 0.9999 | 0.555005  | 0.0153 | 0.260639  | 0.6518 | 0.407331  | 0.0887 |

|          |            |           |        |           |        |           |        |           |        |
|----------|------------|-----------|--------|-----------|--------|-----------|--------|-----------|--------|
| 10813236 | Sepp1      | -0.013555 | 0.9999 | -0.910839 | 0.0015 | -0.508148 | 0.2463 | -0.189187 | 0.6888 |
| 10813330 | Rpl37      | -0.077143 | 0.9999 | 0.006330  | 0.9945 | -0.114360 | 0.9268 | -0.503773 | 0.0128 |
| 10813445 | Lifr       | 0.443067  | 0.9999 | -1.162917 | 0.0008 | -0.448570 | 0.5679 | 0.087952  | 0.9096 |
| 10813732 | Zfr        | 0.060676  | 0.9999 | 0.504713  | 0.0198 | 0.449110  | 0.1002 | 0.585559  | 0.0088 |
| 10813969 | Ankh       | 0.251252  | 0.9999 | -0.134011 | 0.8505 | 0.360771  | 0.3432 | 0.546361  | 0.0206 |
| 10814142 | ---        | 0.089703  | 0.9999 | 0.222029  | 0.7980 | 0.292533  | 0.7992 | 0.708366  | 0.0338 |
| 10814194 | RGD1565641 | -0.311873 | 0.9999 | -0.128606 | 0.9132 | -0.305062 | 0.7080 | -0.643998 | 0.0305 |
| 10814521 | Aadacl1    | 0.083536  | 0.9999 | 0.238786  | 0.6011 | 0.410227  | 0.2825 | 0.687227  | 0.0079 |
| 10814650 | Rpl221l    | -0.173375 | 0.9999 | -0.127841 | 0.9474 | -0.221732 | 0.9388 | -1.142416 | 0.0085 |
| 10814717 | Zmat3      | 0.040650  | 0.9999 | 0.614913  | 0.0183 | 0.349501  | 0.4982 | 0.314028  | 0.3036 |
| 10814726 | Pik3ca     | -0.018222 | 0.9999 | 0.541742  | 0.0109 | 0.598583  | 0.0127 | 0.583690  | 0.0082 |
| 10814795 | Usp13      | -0.035685 | 0.9999 | 0.516947  | 0.0020 | 0.454547  | 0.0204 | 0.568392  | 0.0016 |
| 10814858 | Atp11b     | 0.032894  | 0.9999 | 0.268893  | 0.4007 | 0.314967  | 0.4298 | 0.443292  | 0.0498 |
| 10814892 | ---        | -0.080294 | 0.9999 | 0.003114  | 0.9976 | -0.015859 | 0.9945 | -0.437084 | 0.0470 |
| 10815099 | Hspa4l     | -0.326703 | 0.9999 | 1.297812  | 0.0137 | 0.786596  | 0.3835 | 0.796710  | 0.1674 |
| 10815176 | Phf17      | 0.000260  | 0.9999 | 0.350389  | 0.1674 | 0.571586  | 0.0212 | 0.641534  | 0.0045 |
| 10815308 | Mgst2      | 0.206645  | 0.9999 | -0.867283 | 0.0768 | -0.863992 | 0.1667 | -1.227937 | 0.0095 |
| 10815474 | Dclk1      | 0.030291  | 0.9999 | -0.541289 | 0.0387 | -0.324135 | 0.5488 | -0.370904 | 0.1862 |
| 10815500 | ---        | -0.305267 | 0.9999 | -0.228526 | 0.7392 | -0.219626 | 0.8697 | -0.607226 | 0.0438 |
| 10815857 | Schip1     | 0.066704  | 0.9999 | 0.188731  | 0.6093 | 0.274381  | 0.4713 | 0.459681  | 0.0229 |
| 10816144 | Sfrp2      | 0.052116  | 0.9999 | -1.253867 | 0.0051 | -0.837925 | 0.1881 | -0.484853 | 0.3980 |
| 10816807 | Pbxip1     | 0.064646  | 0.9999 | 0.067900  | 0.9543 | 0.257562  | 0.7188 | 0.543970  | 0.0324 |
| 10817046 | S100a16    | -0.107392 | 0.9999 | -0.111137 | 0.8788 | -0.182259 | 0.8124 | -0.446802 | 0.0372 |
| 10817061 | S100a5     | -0.011937 | 0.9999 | -0.279314 | 0.1178 | -0.122202 | 0.8614 | -0.324164 | 0.0472 |
| 10817065 | S100a6     | -0.315628 | 0.9999 | -0.211354 | 0.8106 | -0.281919 | 0.8097 | -0.826291 | 0.0132 |
| 10817186 | S100a10    | 0.055857  | 0.9999 | -0.160250 | 0.8412 | -0.197983 | 0.8704 | -0.595550 | 0.0299 |
| 10817297 | Rfx5       | 0.089546  | 0.9999 | 0.286553  | 0.2355 | 0.257006  | 0.5185 | 0.509954  | 0.0109 |
| 10817331 | Tmod4      | 0.227587  | 0.9999 | -0.663156 | 0.0106 | -0.220084 | 0.8213 | 0.149968  | 0.7289 |
| 10817419 | Ctsk       | -0.070856 | 0.9999 | -1.282331 | 0.0001 | -0.540697 | 0.2909 | -0.522340 | 0.1460 |
| 10817527 | Hist2h2ab  | -0.189846 | 0.9999 | -0.331881 | 0.8376 | -0.746972 | 0.4885 | -1.118718 | 0.0464 |
| 10817531 | Hist2h2ab  | 0.017997  | 0.9999 | -0.364530 | 0.3652 | -0.411168 | 0.4279 | -0.691048 | 0.0190 |
| 10817535 | Hist2h3c2  | 0.035081  | 0.9999 | -0.567609 | 0.1833 | -0.630011 | 0.2257 | -0.764895 | 0.0359 |
| 10817539 | Hist2h2bb  | -0.122485 | 0.9999 | -0.630947 | 0.0932 | -0.563170 | 0.2898 | -0.769669 | 0.0285 |
| 10817666 | Gja5       | 0.206103  | 0.9999 | -1.067871 | 0.0020 | -0.142455 | 0.9562 | 0.371281  | 0.4099 |
| 10817868 | Igsf3      | 0.123968  | 0.9999 | 0.195085  | 0.8350 | 0.464060  | 0.4192 | 0.701707  | 0.0317 |
| 10818649 | Lppr5      | 0.379474  | 0.9999 | -1.509696 | 0.0203 | -1.192914 | 0.1864 | -0.657773 | 0.4282 |
| 10818708 | F3         | 0.009677  | 0.9999 | -0.523986 | 0.0344 | -0.767036 | 0.0032 | -0.898853 | 0.0005 |
| 10818793 | Gclm       | 0.044132  | 0.9999 | 0.565401  | 0.0311 | 0.295417  | 0.6484 | 0.332382  | 0.2600 |
| 10819245 | Manba      | 0.053177  | 0.9999 | 0.012893  | 0.9918 | 0.200420  | 0.8704 | 0.625233  | 0.0255 |
| 10819305 | Emcn       | -0.062447 | 0.9999 | -0.783463 | 0.0109 | -0.834265 | 0.0183 | -0.692073 | 0.0276 |
| 10819500 | ---        | -0.101135 | 0.9999 | -1.188699 | 0.0044 | -1.016020 | 0.0444 | -0.804547 | 0.0685 |
| 10819726 | Ctbs       | -0.034889 | 0.9999 | -0.474152 | 0.0520 | -0.437069 | 0.1715 | -0.531180 | 0.0254 |
| 10819737 | Gng5       | 0.035296  | 0.9999 | 0.239772  | 0.4054 | 0.132456  | 0.8948 | 0.438494  | 0.0299 |
| 10819770 | Eltld1     | -0.172780 | 0.9999 | -0.748972 | 0.0528 | -0.747827 | 0.1173 | -0.783849 | 0.0365 |
| 10819787 | Dnajb4     | -0.163741 | 0.9999 | 0.530031  | 0.0129 | 0.425738  | 0.1245 | 0.538808  | 0.0138 |
| 10820145 | ---        | -0.120159 | 0.9999 | -0.679629 | 0.0189 | -0.295676 | 0.7223 | -0.197973 | 0.6583 |
| 10820282 | Vcan       | -0.007744 | 0.9999 | -0.909333 | 0.0382 | -0.226093 | 0.9380 | -0.294579 | 0.6550 |

|          |           |           |        |           |        |           |        |           |        |
|----------|-----------|-----------|--------|-----------|--------|-----------|--------|-----------|--------|
| 10820308 | Atp6ap11  | 0.315425  | 0.9999 | -1.326672 | 0.0142 | -0.143207 | 0.9713 | -0.046947 | 0.9743 |
| 10820577 | F2rl1     | -0.424403 | 0.9999 | 1.315829  | 0.0038 | 0.935964  | 0.1200 | 0.479539  | 0.4184 |
| 10820835 | Map1b     | -0.066449 | 0.9999 | 0.634530  | 0.0804 | 0.877519  | 0.0223 | 0.724888  | 0.0342 |
| 10821050 | Pik3r1    | 0.113111  | 0.9999 | -0.705430 | 0.0393 | -0.051291 | 0.9846 | 0.055968  | 0.9451 |
| 10821632 | Ghr       | 0.110018  | 0.9999 | -0.668603 | 0.0461 | -0.463587 | 0.4250 | 0.016141  | 0.9859 |
| 10821666 | C7        | -0.258495 | 0.9999 | -2.371834 | 0.0003 | -2.180661 | 0.0023 | -1.941725 | 0.0052 |
| 10821695 | Rps15a    | -0.142319 | 0.9999 | 0.109040  | 0.9452 | -0.133025 | 0.9562 | -0.798910 | 0.0252 |
| 10821698 | Osmr      | 0.011954  | 0.9999 | -0.937880 | 0.0192 | -0.894405 | 0.0660 | -0.702237 | 0.0942 |
| 10822043 | Cdh6      | 0.035983  | 0.9999 | -0.274394 | 0.0415 | -0.148143 | 0.6525 | -0.000362 | 0.9989 |
| 10822424 | Cyp7b1    | -0.060965 | 0.9999 | -0.617839 | 0.0013 | -0.498601 | 0.0263 | -0.518053 | 0.0104 |
| 10822637 | Skil      | -0.086186 | 0.9999 | 0.519181  | 0.1397 | 0.581952  | 0.1681 | 0.659711  | 0.0350 |
| 10822781 | Fxr1      | -0.008668 | 0.9999 | -0.214277 | 0.6824 | -0.304427 | 0.5977 | -0.554069 | 0.0308 |
| 10823102 | Setd7     | -0.033651 | 0.9999 | 0.405051  | 0.0650 | 0.362130  | 0.2289 | 0.438825  | 0.0370 |
| 10823278 | Tm4sf1    | -0.259694 | 0.9999 | -1.514697 | 0.0008 | -1.173322 | 0.0261 | -1.433033 | 0.0029 |
| 10823309 | Serp1     | -0.112832 | 0.9999 | -0.172934 | 0.6188 | -0.263480 | 0.4380 | -0.460514 | 0.0163 |
| 10823338 | Siah2     | -0.216383 | 0.9999 | 0.455102  | 0.0082 | 0.264540  | 0.3676 | 0.072144  | 0.8245 |
| 10823605 | B3galnt1  | -0.192257 | 0.9999 | -0.733135 | 0.0043 | -0.428402 | 0.2905 | -0.470094 | 0.0871 |
| 10824031 | Fhdc1     | 0.535294  | 0.9999 | -1.037114 | 0.0044 | -0.697217 | 0.1716 | -0.410440 | 0.3721 |
| 10824294 | Pmf1      | 0.064398  | 0.9999 | -0.477256 | 0.1006 | -0.464333 | 0.2252 | -0.742364 | 0.0070 |
| 10824349 | Syt11     | -0.167252 | 0.9999 | 1.375130  | 0.0007 | 1.548348  | 0.0004 | 1.485440  | 0.0008 |
| 10824965 | Mllt11    | -0.722092 | 0.9999 | 1.166575  | 0.0380 | 0.951305  | 0.2294 | 0.251248  | 0.7986 |
| 10825113 | Plekho1   | 0.142183  | 0.9999 | 0.120825  | 0.7333 | 0.154818  | 0.7394 | 0.319126  | 0.0427 |
| 10825144 | Hist2h3c2 | 0.035081  | 0.9999 | -0.567609 | 0.1833 | -0.630011 | 0.2257 | -0.764895 | 0.0359 |
| 10825146 | Hist2h2ab | 0.021753  | 0.9999 | -0.360233 | 0.3731 | -0.417891 | 0.4075 | -0.688787 | 0.0190 |
| 10825236 | Rpl38     | -0.040517 | 0.9999 | 0.017847  | 0.9806 | -0.144447 | 0.7159 | -0.343543 | 0.0170 |
| 10825472 | Atp1a1    | 0.180057  | 0.9999 | -0.363920 | 0.0208 | -0.131500 | 0.8255 | 0.045880  | 0.8909 |
| 10825575 | Olfml3    | 0.073361  | 0.9999 | -1.476481 | 0.0002 | -0.848766 | 0.0858 | -0.914838 | 0.0232 |
| 10825931 | Gstm4     | 0.029648  | 0.9999 | -0.626080 | 0.0086 | -0.530418 | 0.0721 | -0.275956 | 0.3429 |
| 10825940 | Ampd2     | 0.142207  | 0.9999 | 0.317747  | 0.1711 | 0.355817  | 0.2041 | 0.536322  | 0.0089 |
| 10825992 | Sypl2     | -0.202828 | 0.9999 | 1.517518  | 0.0003 | 0.640760  | 0.3681 | 0.088896  | 0.9265 |
| 10825994 | Sypl2     | -0.171387 | 0.9999 | 0.909246  | 0.0007 | 0.443865  | 0.3017 | 0.205447  | 0.6179 |
| 10826249 | Vcam1     | 0.023488  | 0.9999 | -1.583862 | 0.0006 | -1.052592 | 0.0583 | -0.614974 | 0.2438 |
| 10826682 | Alpk1     | -0.009554 | 0.9999 | -0.114523 | 0.7556 | 0.067396  | 0.9484 | 0.319634  | 0.0400 |
| 10826814 | Ostc      | -0.249583 | 0.9999 | 0.005564  | 0.9966 | -0.363631 | 0.5250 | -0.667714 | 0.0189 |
| 10826818 | Rpl34     | -0.063680 | 0.9999 | 0.031290  | 0.9693 | -0.044010 | 0.9678 | -0.328297 | 0.0322 |
| 10826866 | LOC686753 | 0.108064  | 0.9999 | 0.230451  | 0.3301 | 0.295550  | 0.2571 | 0.373452  | 0.0347 |
| 10827094 | Gbp1      | 0.187397  | 0.9999 | -0.958760 | 0.0013 | -0.369012 | 0.6085 | -0.337363 | 0.3755 |
| 10827349 | Ifi44     | -0.138880 | 0.9999 | -0.687913 | 0.0723 | -0.841533 | 0.0488 | -0.442076 | 0.2916 |
| 10827796 | RT1-N3    | -0.076428 | 0.9999 | -0.693262 | 0.0006 | -0.605258 | 0.0079 | -0.728028 | 0.0010 |
| 10827809 | RT1-S3    | -0.234324 | 0.9999 | -0.691112 | 0.0373 | -0.696118 | 0.0787 | -0.669166 | 0.0405 |
| 10827820 | RT1-T24-4 | -0.042027 | 0.9999 | -0.713490 | 0.0008 | -0.704159 | 0.0026 | -0.603854 | 0.0076 |
| 10827846 | Abcf1     | -0.044546 | 0.9999 | 0.355529  | 0.0475 | 0.160060  | 0.7773 | 0.146956  | 0.5448 |
| 10828344 | RT1-Da    | -0.133265 | 0.9999 | -0.557472 | 0.0301 | -0.649331 | 0.0241 | -0.598866 | 0.0202 |
| 10828357 | Psmb9     | -0.183832 | 0.9999 | -0.569693 | 0.0415 | -0.506840 | 0.1721 | -0.520156 | 0.0620 |
| 10828384 | Slc39a7   | -0.044244 | 0.9999 | -0.099787 | 0.8933 | -0.148409 | 0.8704 | -0.420145 | 0.0395 |
| 10828433 | Rps18     | -0.105917 | 0.9999 | -0.003030 | 0.9977 | -0.097007 | 0.9562 | -0.687420 | 0.0088 |
| 10828614 | ---       | -0.109090 | 0.9999 | 0.463587  | 0.0194 | 0.389243  | 0.1357 | 0.355720  | 0.0854 |



|          |            |           |        |           |        |           |        |           |        |
|----------|------------|-----------|--------|-----------|--------|-----------|--------|-----------|--------|
| 10828737 | Rpl10a     | -0.036187 | 0.9999 | -0.128757 | 0.6480 | -0.154700 | 0.6899 | -0.314463 | 0.0317 |
| 10828827 | Cdkn1a     | 0.175675  | 0.9999 | 0.725883  | 0.0100 | 0.366849  | 0.5289 | 0.305436  | 0.3853 |
| 10829046 | Glp1r      | 0.055826  | 0.9999 | 0.190178  | 0.8212 | 0.696609  | 0.0529 | 0.674817  | 0.0279 |
| 10829137 | Pde9a      | -0.063995 | 0.9999 | -0.378588 | 0.0430 | -0.144181 | 0.8488 | -0.088493 | 0.7827 |
| 10829367 | Adarb1     | 0.030530  | 0.9999 | 0.472163  | 0.2161 | 0.547280  | 0.2262 | 0.700772  | 0.0279 |
| 10829378 | Col18a1    | 0.078188  | 0.9999 | -0.647848 | 0.0370 | -0.293178 | 0.7536 | 0.007512  | 0.9925 |
| 10829437 | Col6a1     | 0.047001  | 0.9999 | -1.193555 | 0.0020 | -0.529015 | 0.5126 | -0.644588 | 0.1324 |
| 10829470 | Col6a2     | 0.039747  | 0.9999 | -1.028738 | 0.0029 | -0.460429 | 0.5304 | -0.630202 | 0.0908 |
| 10829713 | Bicc1      | 0.170472  | 0.9999 | -0.849309 | 0.0033 | -0.653617 | 0.0726 | -0.605663 | 0.0453 |
| 10829738 | Phyhipl    | 0.079381  | 0.9999 | -0.575814 | 0.0101 | -0.488757 | 0.0767 | -0.319337 | 0.2002 |
| 10829933 | RGD1562230 | -0.084558 | 0.9999 | -1.025305 | 0.0175 | -0.655575 | 0.3639 | -0.339989 | 0.5871 |
| 10829976 | Psap       | 0.161220  | 0.9999 | -0.079530 | 0.7898 | 0.061313  | 0.9380 | 0.239587  | 0.0410 |
| 10830189 | Gja1       | 0.079593  | 0.9999 | -0.719823 | 0.0142 | -0.414013 | 0.4427 | 0.078013  | 0.9027 |
| 10830989 | Ppp1r10    | 0.040449  | 0.9999 | 0.302650  | 0.2457 | 0.367990  | 0.2183 | 0.547767  | 0.0105 |
| 10831077 | Ier3       | -0.274129 | 0.9999 | 0.848393  | 0.0020 | 0.740136  | 0.0217 | 0.523590  | 0.0743 |
| 10831247 | G7c        | -0.031809 | 0.9999 | 0.385690  | 0.1471 | 0.497705  | 0.0835 | 0.488025  | 0.0380 |
| 10831300 | Neu1       | 0.034838  | 0.9999 | 0.111059  | 0.7811 | 0.313262  | 0.1275 | 0.491183  | 0.0029 |
| 10831595 | Psmb8      | -0.158940 | 0.9999 | -0.424453 | 0.0597 | -0.500649 | 0.0488 | -0.441378 | 0.0426 |
| 10831825 | RGD1306917 | -0.127406 | 0.9999 | -0.085022 | 0.9133 | -0.143266 | 0.8704 | -0.452852 | 0.0215 |
| 10831874 | Rps10      | -0.011380 | 0.9999 | 0.057463  | 0.9281 | -0.013543 | 0.9932 | -0.321483 | 0.0343 |
| 10832076 | LOC689755  | 0.061897  | 0.9999 | -0.746178 | 0.0065 | -0.258129 | 0.7781 | -0.031060 | 0.9651 |
| 10832163 | Wdr4       | -0.024555 | 0.9999 | 0.391569  | 0.0411 | 0.295728  | 0.3159 | 0.139623  | 0.6151 |
| 10832831 | Jmjd1c     | 0.150949  | 0.9999 | 0.358383  | 0.3352 | 0.418459  | 0.3598 | 0.724036  | 0.0102 |
| 10832833 | Jmjd1c     | 0.030895  | 0.9999 | 0.369083  | 0.5191 | 0.410805  | 0.6264 | 0.748141  | 0.0342 |
| 10832840 | ---        | -0.061866 | 0.9999 | -1.475879 | 0.0114 | -0.870492 | 0.3865 | -0.772728 | 0.2462 |
| 10832865 | Tceb1      | -0.028483 | 0.9999 | 0.011680  | 0.9914 | -0.088897 | 0.9567 | -0.495140 | 0.0419 |
| 10832920 | Ddit4      | 0.182125  | 0.9999 | 0.646006  | 0.0100 | 0.591991  | 0.0482 | 0.689621  | 0.0082 |
| 10833588 | Marcks     | -0.095755 | 0.9999 | -0.657971 | 0.0156 | -0.544037 | 0.1219 | -0.602238 | 0.0299 |
| 10834022 | Arrdc3     | 0.444387  | 0.9999 | -1.084861 | 0.0208 | -0.274695 | 0.9257 | 0.096121  | 0.9286 |
| 10834967 | Slc27a4    | -0.092553 | 0.9999 | 0.569052  | 0.0013 | 0.298237  | 0.2829 | 0.186723  | 0.4179 |
| 10835498 | Ppapdc3    | 0.039044  | 0.9999 | 0.441704  | 0.1540 | 0.381384  | 0.4350 | 0.609867  | 0.0257 |
| 10835645 | LOC499782  | -0.023670 | 0.9999 | -0.015147 | 0.9844 | -0.079027 | 0.9432 | -0.440290 | 0.0068 |
| 10835654 | Angptl2    | 0.192705  | 0.9999 | -1.313074 | 0.0019 | -0.572089 | 0.5251 | -0.350908 | 0.5782 |
| 10835975 | Rps20      | -0.043233 | 0.9999 | -0.034490 | 0.9760 | -0.050893 | 0.9732 | -0.498250 | 0.0166 |
| 10836067 | Rpl37      | -0.036413 | 0.9999 | 0.014017  | 0.9873 | -0.087200 | 0.9438 | -0.399790 | 0.0259 |
| 10836072 | Acvr2a     | -0.070156 | 0.9999 | 0.204379  | 0.7238 | 0.209932  | 0.8384 | 0.571644  | 0.0287 |
| 10836321 | Pkp4       | 0.070083  | 0.9999 | 0.140009  | 0.7857 | 0.113409  | 0.9300 | 0.457126  | 0.0250 |
| 10836504 | Xirp2      | -0.515148 | 0.9999 | 1.704832  | 0.0229 | 1.701324  | 0.0568 | 0.678364  | 0.4990 |
| 10836849 | Itga6      | -0.471383 | 0.9999 | 1.095662  | 0.0020 | 0.605148  | 0.2786 | 0.314305  | 0.5389 |
| 10837366 | Slc43a3    | 0.157104  | 0.9999 | -0.581218 | 0.0018 | -0.502487 | 0.0217 | -0.344478 | 0.0856 |
| 10837424 | Aplnr      | 0.121061  | 0.9999 | -0.599252 | 0.1067 | -0.564407 | 0.2643 | -0.742205 | 0.0305 |
| 10837881 | Lrp4       | 0.095361  | 0.9999 | 0.243920  | 0.4972 | 0.413277  | 0.1822 | 0.501358  | 0.0280 |
| 10837960 | Arhgap1    | -0.082682 | 0.9999 | -0.235355 | 0.2075 | -0.484899 | 0.0034 | -0.135861 | 0.5196 |
| 10838155 | Cat        | 0.248146  | 0.9999 | 0.371492  | 0.3792 | 0.235329  | 0.8509 | 0.601433  | 0.0480 |
| 10838170 | Abtb2      | -0.126573 | 0.9999 | 0.557936  | 0.0238 | 0.282066  | 0.6466 | 0.282220  | 0.3398 |
| 10838451 | Lpcat4     | 0.020508  | 0.9999 | 0.411222  | 0.0017 | 0.252466  | 0.1714 | 0.204261  | 0.1674 |
| 10838704 | Ivd        | 0.083288  | 0.9999 | -0.646768 | 0.0283 | -0.222513 | 0.8592 | 0.232095  | 0.5809 |

|          |            |           |        |           |        |           |        |           |        |
|----------|------------|-----------|--------|-----------|--------|-----------|--------|-----------|--------|
| 10838729 | Rpusd2     | 0.095751  | 0.9999 | 0.289743  | 0.4533 | 0.424155  | 0.2641 | 0.654170  | 0.0117 |
| 10839400 | Rpl32      | -0.096547 | 0.9999 | 0.015893  | 0.9861 | -0.096057 | 0.9392 | -0.427880 | 0.0209 |
| 10839751 | Polr1b     | -0.045166 | 0.9999 | 0.472036  | 0.2386 | 0.369580  | 0.6484 | 0.645920  | 0.0499 |
| 10839803 | Rpl2211    | -0.183323 | 0.9999 | -0.177159 | 0.9213 | -0.298348 | 0.8844 | -1.174354 | 0.0082 |
| 10839876 | Rps12      | -0.174583 | 0.9999 | 0.007727  | 0.9959 | -0.168693 | 0.9433 | -0.784022 | 0.0224 |
| 10839947 | Mrps26     | 0.073805  | 0.9999 | -0.120671 | 0.7907 | -0.200026 | 0.6518 | -0.377364 | 0.0341 |
| 10840065 | Smox       | 0.150421  | 0.9999 | 0.533057  | 0.0826 | 0.614997  | 0.0804 | 0.624521  | 0.0314 |
| 10840076 | Prnp       | -0.258776 | 0.9999 | 0.703175  | 0.0398 | 0.613434  | 0.1806 | 0.117709  | 0.8583 |
| 10840183 | Plcb4      | 0.004781  | 0.9999 | -0.732147 | 0.0389 | -0.443360 | 0.5357 | -0.008545 | 0.9925 |
| 10840721 | Gins1      | -0.122361 | 0.9999 | -0.642791 | 0.1107 | -0.500222 | 0.4733 | -0.847281 | 0.0219 |
| 10840803 | Csnk2a1    | 0.069446  | 0.9999 | 0.096694  | 0.8744 | 0.200658  | 0.6669 | 0.455597  | 0.0136 |
| 10842436 | Rpl38      | -0.043953 | 0.9999 | 0.030870  | 0.9678 | -0.138453 | 0.7590 | -0.335313 | 0.0215 |
| 10842486 | Pard6b     | -0.064219 | 0.9999 | 0.443586  | 0.0316 | 0.421756  | 0.0984 | 0.337342  | 0.1184 |
| 10842500 | RGD1562846 | -0.413193 | 0.9999 | 0.906458  | 0.0444 | 0.574956  | 0.5185 | 0.229972  | 0.7601 |
| 10842644 | Npep11     | 0.162499  | 0.9999 | -0.502052 | 0.0128 | -0.258669 | 0.5413 | -0.203502 | 0.4316 |
| 10842667 | Rpl24      | -0.138658 | 0.9999 | 0.116113  | 0.9138 | -0.169842 | 0.9073 | -0.616250 | 0.0227 |
| 10842707 | RGD1311952 | -0.002872 | 0.9999 | -0.025373 | 0.9722 | 0.012029  | 0.9932 | 0.266682  | 0.0490 |
| 10842805 | Rps21      | -0.034303 | 0.9999 | 0.007063  | 0.9959 | -0.115387 | 0.9562 | -0.694057 | 0.0267 |
| 10842964 | Ppdpf      | 0.136537  | 0.9999 | -0.047790 | 0.9519 | 0.257417  | 0.3627 | 0.524839  | 0.0029 |
| 10843013 | Zgpat      | 0.079266  | 0.9999 | 0.240826  | 0.1128 | 0.190208  | 0.4620 | 0.307785  | 0.0272 |
| 10843357 | Tubb2c     | -0.076056 | 0.9999 | 0.341457  | 0.0432 | 0.200107  | 0.5904 | 0.105020  | 0.6865 |
| 10843438 | Uap111     | 0.160558  | 0.9999 | -0.527083 | 0.0163 | -0.242234 | 0.6733 | -0.160906 | 0.6254 |
| 10843863 | Rps13      | -0.087093 | 0.9999 | 0.058406  | 0.9767 | -0.168118 | 0.9467 | -0.792507 | 0.0317 |
| 10843938 | Sardh      | 0.192918  | 0.9999 | -0.699777 | 0.0020 | -0.222313 | 0.7606 | -0.053934 | 0.9165 |
| 10844183 | Crat       | 0.212660  | 0.9999 | 0.107784  | 0.8245 | 0.104168  | 0.9177 | 0.410692  | 0.0195 |
| 10844198 | Ier51      | 0.138122  | 0.9999 | -0.315248 | 0.1833 | -0.339311 | 0.2541 | -0.412998 | 0.0423 |
| 10844296 | LOC499779  | -0.080427 | 0.9999 | -0.095886 | 0.9377 | -0.240165 | 0.8033 | -0.619856 | 0.0247 |
| 10844302 | Dnm1       | 0.104374  | 0.9999 | -0.391812 | 0.0199 | -0.197306 | 0.6306 | -0.152729 | 0.5006 |
| 10844883 | Rpl35      | -0.087163 | 0.9999 | 0.089860  | 0.8464 | -0.100633 | 0.9003 | -0.358405 | 0.0214 |
| 10844946 | Rps17      | -0.148832 | 0.9999 | 0.040459  | 0.9795 | -0.119478 | 0.9562 | -0.813722 | 0.0081 |
| 10845060 | Gtdc1      | -0.145746 | 0.9999 | -0.616553 | 0.0380 | -0.058769 | 0.9779 | -0.064298 | 0.9216 |
| 10845429 | Acvr1      | 0.122195  | 0.9999 | 0.606354  | 0.0183 | 0.515588  | 0.1183 | 0.433546  | 0.1102 |
| 10845607 | Rbms1      | -0.041034 | 0.9999 | -0.340815 | 0.0041 | -0.328576 | 0.0183 | -0.236266 | 0.0577 |
| 10846185 | Gpr155     | -0.044736 | 0.9999 | 0.394705  | 0.0961 | 0.335479  | 0.3464 | 0.508022  | 0.0214 |
| 10846854 | Serping1   | 0.003681  | 0.9999 | -0.852089 | 0.0182 | -0.479660 | 0.5060 | -0.420641 | 0.3274 |
| 10846928 | ---        | -0.363959 | 0.9999 | -0.245372 | 0.8857 | -0.355359 | 0.8697 | -1.000561 | 0.0402 |
| 10847562 | Tspan18    | 0.246236  | 0.9999 | -0.867825 | 0.0032 | -0.106477 | 0.9602 | 0.276562  | 0.4982 |
| 10847572 | Cd82       | -0.042227 | 0.9999 | -1.140727 | 0.0016 | -0.686055 | 0.1833 | -0.816506 | 0.0310 |
| 10847957 | Prrg4      | -0.359445 | 0.9999 | 0.906638  | 0.0403 | 0.803442  | 0.1703 | 0.617349  | 0.1919 |
| 10847995 | Rpl35a     | -0.154888 | 0.9999 | 0.025305  | 0.9828 | -0.202113 | 0.7853 | -0.775078 | 0.0010 |
| 10848891 | Ttbk2      | 0.146195  | 0.9999 | 0.042648  | 0.9762 | 0.232711  | 0.7793 | 0.590671  | 0.0215 |
| 10849048 | Hisppd2a   | -0.626516 | 0.9999 | 1.464370  | 0.0003 | 1.050183  | 0.0242 | 0.733043  | 0.0870 |
| 10849228 | ---        | -0.111283 | 0.9999 | -0.481918 | 0.0380 | -0.573649 | 0.0261 | -0.449217 | 0.0514 |
| 10849889 | Cpxm1      | 0.018841  | 0.9999 | -0.954461 | 0.0013 | -0.562737 | 0.1802 | -0.486315 | 0.1381 |
| 10850131 | Pcna       | 0.013819  | 0.9999 | -0.120603 | 0.9382 | -0.359601 | 0.7053 | -0.745462 | 0.0321 |
| 10850315 | Flrt3      | 0.205486  | 0.9999 | 0.100440  | 0.9024 | 0.242376  | 0.6615 | 0.549713  | 0.0129 |
| 10850525 | Thbd       | 0.197991  | 0.9999 | -1.479420 | 0.0007 | -0.997914 | 0.0675 | -0.608710 | 0.2281 |

|          |           |           |        |           |        |           |        |           |        |
|----------|-----------|-----------|--------|-----------|--------|-----------|--------|-----------|--------|
| 10850530 | Cd93      | -0.202792 | 0.9999 | -0.785586 | 0.0156 | -0.682755 | 0.0934 | -0.846567 | 0.0111 |
| 10850878 | Comm7     | -0.013645 | 0.9999 | -0.261682 | 0.4006 | -0.240403 | 0.6638 | -0.438370 | 0.0448 |
| 10851407 | Chd6      | 0.087129  | 0.9999 | -0.050857 | 0.9693 | 0.258673  | 0.7027 | 0.571281  | 0.0215 |
| 10851787 | LOC685574 | 0.040610  | 0.9999 | 0.086661  | 0.9273 | 0.197861  | 0.8033 | 0.520117  | 0.0217 |
| 10851861 | Prex1     | 0.103528  | 0.9999 | 0.167888  | 0.7643 | 0.504418  | 0.0717 | 0.644572  | 0.0064 |
| 10851960 | Spata2    | 0.187418  | 0.9999 | 0.418878  | 0.0245 | 0.222035  | 0.6048 | 0.281570  | 0.1642 |
| 10852144 | Pmepa1    | 0.056563  | 0.9999 | 1.199369  | 0.0007 | 1.212588  | 0.0018 | 0.929668  | 0.0120 |
| 10852415 | Ythdf1    | 0.069497  | 0.9999 | 0.285593  | 0.0439 | 0.167900  | 0.5901 | 0.280165  | 0.0445 |
| 10852740 | Rpl10a    | -0.054453 | 0.9999 | -0.127507 | 0.6315 | -0.159810 | 0.6486 | -0.298347 | 0.0347 |
| 10852799 | Prkag2    | -0.078718 | 0.9999 | -0.307485 | 0.1662 | -0.473664 | 0.0301 | -0.049300 | 0.9058 |
| 10852836 | Smarcd3   | -0.049667 | 0.9999 | 0.381849  | 0.0380 | 0.090721  | 0.9432 | 0.174970  | 0.4520 |
| 10852964 | Tomm7     | -0.017950 | 0.9999 | -0.028907 | 0.9795 | -0.106100 | 0.9433 | -0.458093 | 0.0338 |
| 10852987 | Srpk2     | 0.104798  | 0.9999 | 0.039857  | 0.9654 | 0.177365  | 0.7233 | 0.400241  | 0.0227 |
| 10853396 | Steap1    | -0.069774 | 0.9999 | -0.830322 | 0.0164 | -1.029897 | 0.0070 | -1.074502 | 0.0029 |
| 10853469 | Fzd1      | 0.041954  | 0.9999 | -0.742982 | 0.0153 | -0.814634 | 0.0194 | -0.620079 | 0.0468 |
| 10853508 | Gatad1    | 0.018962  | 0.9999 | -0.106327 | 0.7791 | -0.162332 | 0.6832 | -0.329300 | 0.0307 |
| 10853663 | Rpl31     | -0.069953 | 0.9999 | 0.074870  | 0.9649 | -0.110340 | 0.9606 | -0.751969 | 0.0208 |
| 10853797 | Tes       | -0.122423 | 0.9999 | 0.586515  | 0.1031 | 0.841999  | 0.0241 | 0.267157  | 0.5689 |
| 10853816 | Cav1      | -0.119027 | 0.9999 | -1.445863 | 0.0013 | -0.861270 | 0.1706 | -1.020319 | 0.0295 |
| 10854199 | Tspan33   | 0.095320  | 0.9999 | 0.161561  | 0.4627 | 0.335782  | 0.0476 | 0.314055  | 0.0305 |
| 10854365 | Exoc4     | -0.095293 | 0.9999 | -0.902538 | 0.0217 | -0.477652 | 0.5910 | -0.160483 | 0.8266 |
| 10854437 | Bpgm      | 0.245272  | 0.9999 | -0.091139 | 0.9388 | 0.257712  | 0.7504 | 0.657545  | 0.0154 |
| 10855185 | ---       | -0.364940 | 0.9999 | -0.211892 | 0.9682 | -0.814236 | 0.8386 | -2.022469 | 0.0461 |
| 10855416 | Tmem176a  | 0.078421  | 0.9999 | -2.334852 | 0.0000 | -1.480423 | 0.0043 | -0.863429 | 0.0845 |
| 10855506 | Npy       | -0.119933 | 0.9999 | -0.826834 | 0.0170 | -0.866293 | 0.0289 | -0.746266 | 0.0338 |
| 10855549 | Snx10     | 0.099954  | 0.9999 | 0.615764  | 0.0361 | 0.273922  | 0.7606 | 0.344359  | 0.3062 |
| 10855637 | Wipf3     | -0.015289 | 0.9999 | 0.371563  | 0.0484 | 0.221794  | 0.5904 | 0.362047  | 0.0506 |
| 10855664 | MGC95152  | 0.128862  | 0.9999 | 0.019717  | 0.9861 | 0.377382  | 0.2805 | 0.869170  | 0.0005 |
| 10855668 | Znrf2     | 0.083558  | 0.9999 | -0.492355 | 0.0247 | -0.193918 | 0.7990 | 0.102609  | 0.7925 |
| 10855674 | LOC499782 | -0.031593 | 0.9999 | -0.018767 | 0.9828 | -0.084720 | 0.9380 | -0.475240 | 0.0038 |
| 10855785 | Fkbp9     | 0.092412  | 0.9999 | -0.436933 | 0.0440 | -0.046198 | 0.9749 | 0.203464  | 0.4567 |
| 10855881 | Herc3     | 0.204943  | 0.9999 | 0.328860  | 0.4835 | 0.356785  | 0.6075 | 0.615511  | 0.0419 |
| 10855946 | ---       | -0.792271 | 0.9999 | -0.164044 | 0.9720 | -1.160513 | 0.4823 | -1.805584 | 0.0365 |
| 10856468 | Tbx15     | -0.023201 | 0.9999 | 0.433955  | 0.0192 | 0.203261  | 0.6758 | 0.063150  | 0.8656 |
| 10856474 | Reg3b     | 0.134334  | 0.9999 | -2.407356 | 0.0049 | -0.830765 | 0.7606 | -0.656138 | 0.6161 |
| 10856488 | Reg1a     | 0.158898  | 0.9999 | -1.026282 | 0.0015 | -0.628289 | 0.1668 | -0.518022 | 0.1521 |
| 10856747 | Nagk      | 0.019393  | 0.9999 | -0.579047 | 0.0009 | -0.474409 | 0.0198 | -0.524291 | 0.0048 |
| 10856764 | Zfml      | 0.121996  | 0.9999 | 0.261810  | 0.6318 | 0.315237  | 0.6756 | 0.574408  | 0.0500 |
| 10856965 | Snrpg     | -0.078483 | 0.9999 | -0.165291 | 0.8352 | -0.182595 | 0.8948 | -0.671553 | 0.0168 |
| 10857310 | Lsm3      | -0.058947 | 0.9999 | -0.174517 | 0.6627 | -0.338734 | 0.2509 | -0.550977 | 0.0076 |
| 10857460 | Glt8d4    | 0.220223  | 0.9999 | -0.542788 | 0.0309 | -0.182999 | 0.8696 | -0.160218 | 0.6821 |
| 10857610 | Bhlhe40   | 0.035024  | 0.9999 | 0.572991  | 0.1548 | 0.649935  | 0.1741 | 0.808848  | 0.0225 |
| 10857984 | Pparg     | 0.117725  | 0.9999 | -0.295784 | 0.0781 | -0.254412 | 0.2943 | -0.332674 | 0.0359 |
| 10858165 | Cxcl12    | -0.092718 | 0.9999 | -0.911391 | 0.0194 | -1.071884 | 0.0155 | -0.919168 | 0.0206 |
| 10858182 | ---       | 0.157715  | 0.9999 | 0.170536  | 0.9004 | 0.443790  | 0.5805 | 0.750391  | 0.0388 |
| 10858370 | Usp18     | -0.648119 | 0.9999 | -2.162544 | 0.0000 | -2.153408 | 0.0000 | -2.095557 | 0.0000 |
| 10858655 | Clr       | 0.078958  | 0.9999 | -1.114118 | 0.0019 | -0.668668 | 0.1957 | -0.367398 | 0.4403 |

|          |            |           |        |           |        |           |        |           |        |
|----------|------------|-----------|--------|-----------|--------|-----------|--------|-----------|--------|
| 10859003 | Fgf23      | -0.163446 | 0.9999 | -0.495479 | 0.0416 | -0.416535 | 0.2189 | -0.414324 | 0.0949 |
| 10859086 | Clec2dl1   | -0.201005 | 0.9999 | -1.164369 | 0.0004 | -1.185839 | 0.0007 | -1.210492 | 0.0007 |
| 10859090 | LOC689800  | 0.117036  | 0.9999 | -0.545793 | 0.0051 | -0.334554 | 0.2632 | -0.375363 | 0.0684 |
| 10859108 | Clec2g     | -0.139244 | 0.9999 | -1.209490 | 0.0000 | -0.886321 | 0.0023 | -1.093703 | 0.0003 |
| 10859392 | Mgst1      | 0.376390  | 0.9999 | -1.020762 | 0.0052 | -0.545351 | 0.4092 | -0.187355 | 0.7763 |
| 10859988 | ---        | 0.038931  | 0.9999 | 0.418661  | 0.0463 | 0.386391  | 0.1587 | 0.191445  | 0.4739 |
| 10860058 | Abcb8      | 0.013529  | 0.9999 | -0.419930 | 0.0252 | -0.251660 | 0.4900 | -0.099885 | 0.7548 |
| 10860226 | Lrrc17     | -0.041591 | 0.9999 | -1.012669 | 0.0369 | -0.826937 | 0.2239 | -0.818257 | 0.0992 |
| 10860351 | Hgf        | -0.037230 | 0.9999 | -0.495589 | 0.0131 | -0.383231 | 0.1549 | -0.319919 | 0.1381 |
| 10860597 | Steap4     | 0.253661  | 0.9999 | -1.065483 | 0.0370 | -0.619970 | 0.5717 | -0.195079 | 0.8367 |
| 10860900 | Pdk4       | 0.431408  | 0.9999 | 0.354529  | 0.5946 | 0.568748  | 0.3454 | 1.015906  | 0.0076 |
| 10860939 | Shfm1      | 0.048719  | 0.9999 | -0.084378 | 0.9659 | -0.227028 | 0.9139 | -0.848279 | 0.0237 |
| 10860951 | Asns       | -0.340261 | 0.9999 | 1.016855  | 0.0202 | 0.504668  | 0.6431 | 0.277262  | 0.6915 |
| 10860996 | Rpa3       | -0.209129 | 0.9999 | -0.423624 | 0.4693 | -0.532479 | 0.4419 | -0.896365 | 0.0199 |
| 10861117 | LOC500034  | 0.136621  | 0.9999 | 0.188485  | 0.6760 | 0.270933  | 0.5822 | 0.505779  | 0.0227 |
| 10861554 | Ube2h      | 0.103168  | 0.9999 | 0.120549  | 0.8268 | 0.268681  | 0.4665 | 0.531466  | 0.0082 |
| 10861624 | RGD1566215 | 0.066926  | 0.9999 | -0.634475 | 0.0403 | -0.342846 | 0.6502 | -0.021461 | 0.9792 |
| 10861662 | Podxl      | 0.564500  | 0.9999 | -1.048126 | 0.0020 | -0.442056 | 0.5654 | -0.317647 | 0.5039 |
| 10861676 | Rpl38      | -0.042700 | 0.9999 | 0.013087  | 0.9859 | -0.141813 | 0.7536 | -0.340763 | 0.0214 |
| 10861835 | Ptn        | -0.035681 | 0.9999 | -1.179893 | 0.0124 | -0.945034 | 0.1217 | -0.984556 | 0.0400 |
| 10861986 | Insig1     | -0.116665 | 0.9999 | -0.455089 | 0.0377 | -0.102651 | 0.9458 | -0.127696 | 0.7148 |
| 10861997 | Hipk2      | 0.074527  | 0.9999 | 0.568883  | 0.0453 | 0.159274  | 0.9268 | 0.162651  | 0.7200 |
| 10862014 | Parp12     | -0.130177 | 0.9999 | -0.881655 | 0.0020 | -0.864620 | 0.0079 | -0.648886 | 0.0303 |
| 10862082 | Braf       | -0.005388 | 0.9999 | 0.128446  | 0.7337 | 0.133154  | 0.8452 | 0.380571  | 0.0229 |
| 10862359 | ---        | -0.859251 | 0.9999 | -0.069284 | 0.9867 | -1.373321 | 0.3019 | -1.826854 | 0.0343 |
| 10862415 | Tmem176b   | -0.003238 | 0.9999 | -1.627359 | 0.0006 | -0.901287 | 0.1701 | -0.613269 | 0.2668 |
| 10862499 | RGD1565415 | -0.190380 | 0.9999 | -0.076736 | 0.9501 | -0.353569 | 0.5063 | -0.713817 | 0.0090 |
| 10862634 | Scrn1      | -0.412925 | 0.9999 | 1.076353  | 0.0013 | 0.594325  | 0.2388 | -0.225218 | 0.6797 |
| 10862666 | Gars       | -0.104897 | 0.9999 | 0.402210  | 0.0207 | 0.253677  | 0.4039 | 0.051397  | 0.8882 |
| 10862675 | LOC499782  | -0.031593 | 0.9999 | -0.018767 | 0.9828 | -0.084720 | 0.9380 | -0.475240 | 0.0038 |
| 10862756 | Lanc12     | 0.025248  | 0.9999 | -0.452535 | 0.0451 | -0.221847 | 0.7282 | -0.138729 | 0.6904 |
| 10862795 | Nap115     | -0.087821 | 0.9999 | 0.188555  | 0.8778 | 0.405225  | 0.6518 | 0.749660  | 0.0380 |
| 10862834 | Hint1      | -0.076660 | 0.9999 | 0.008016  | 0.9960 | -0.128810 | 0.9607 | -0.777176 | 0.0404 |
| 10863426 | Pole4      | -0.090668 | 0.9999 | 0.053246  | 0.9688 | -0.168317 | 0.8965 | -0.555197 | 0.0314 |
| 10863489 | Wbp1       | 0.062754  | 0.9999 | -0.451827 | 0.0287 | -0.114139 | 0.9307 | 0.233657  | 0.3405 |
| 10863653 | LOC312502  | -0.135051 | 0.9999 | 0.616666  | 0.0051 | 0.395440  | 0.2253 | 0.437877  | 0.0585 |
| 10863714 | Pcyox1     | 0.072029  | 0.9999 | 0.129540  | 0.7769 | 0.246607  | 0.4823 | 0.370289  | 0.0448 |
| 10863772 | Rpl22      | -0.025099 | 0.9999 | -0.007357 | 0.9945 | -0.146333 | 0.9123 | -0.504257 | 0.0336 |
| 10863993 | Chchd6     | -0.154619 | 0.9999 | -0.378793 | 0.2458 | -0.481209 | 0.1822 | -0.680072 | 0.0111 |
| 10864302 | Suclg2     | -0.016145 | 0.9999 | -0.417263 | 0.0416 | -0.208023 | 0.7057 | -0.174717 | 0.5210 |
| 10864459 | Pdzrn3     | -0.255938 | 0.9999 | 0.716938  | 0.0010 | 0.629227  | 0.0127 | 0.654869  | 0.0049 |
| 10864623 | Camk1      | -0.014799 | 0.9999 | -0.389417 | 0.0475 | -0.258404 | 0.4788 | -0.198095 | 0.4048 |
| 10864722 | LOC362419  | -0.068271 | 0.9999 | -0.119408 | 0.7804 | -0.197549 | 0.6329 | -0.380163 | 0.0272 |
| 10864738 | Raf1       | 0.070537  | 0.9999 | 0.098770  | 0.7891 | 0.142130  | 0.7405 | 0.314947  | 0.0301 |
| 10864769 | Rpl32      | -0.067983 | 0.9999 | 0.046463  | 0.9558 | -0.063740 | 0.9584 | -0.398623 | 0.0238 |
| 10864797 | Plxnd1     | 0.043024  | 0.9999 | -0.681729 | 0.0475 | -0.427032 | 0.5348 | -0.572094 | 0.1016 |
| 10864874 | Rassf4     | 0.011984  | 0.9999 | -1.158452 | 0.0007 | -1.139623 | 0.0023 | -0.602089 | 0.1013 |

|          |            |           |        |           |        |           |        |           |        |
|----------|------------|-----------|--------|-----------|--------|-----------|--------|-----------|--------|
| 10865442 | C1s        | -0.084624 | 0.9999 | -1.991238 | 0.0013 | -1.156468 | 0.1946 | -0.760098 | 0.3139 |
| 10865452 | Emg1       | -0.016838 | 0.9999 | -0.150085 | 0.5483 | -0.244837 | 0.2670 | -0.465449 | 0.0024 |
| 10865502 | Eno2       | 0.017804  | 0.9999 | 0.170985  | 0.7002 | 0.360292  | 0.2342 | 0.482110  | 0.0221 |
| 10865578 | Gpr162     | 0.125733  | 0.9999 | 0.181308  | 0.4223 | 0.204879  | 0.5011 | 0.322418  | 0.0372 |
| 10865715 | Cd9        | 0.078283  | 0.9999 | -0.760635 | 0.0020 | -0.321638 | 0.5537 | -0.186181 | 0.6253 |
| 10865724 | Ntf3       | 0.332043  | 0.9999 | -0.857882 | 0.0159 | -0.173500 | 0.9452 | 0.241493  | 0.6636 |
| 10865782 | Ccnd2      | -0.122350 | 0.9999 | 0.499340  | 0.0042 | 0.297020  | 0.2704 | 0.347670  | 0.0570 |
| 10865956 | RGD1562831 | 0.060711  | 0.9999 | -0.363443 | 0.0408 | -0.358789 | 0.0984 | -0.421721 | 0.0174 |
| 10866401 | Dusp16     | -0.099244 | 0.9999 | 0.760595  | 0.0129 | 0.603966  | 0.1325 | 0.616211  | 0.0488 |
| 10866535 | Rerg       | -0.009685 | 0.9999 | -0.716120 | 0.0192 | -0.534230 | 0.2253 | -0.454607 | 0.1766 |
| 10866544 | Eps8       | 0.153433  | 0.9999 | -0.676385 | 0.0158 | -0.375456 | 0.5018 | -0.473657 | 0.1116 |
| 10867026 | Bhlhe41    | 0.474166  | 0.9999 | -0.743427 | 0.0411 | 0.024052  | 0.9955 | 0.586885  | 0.1197 |
| 10867499 | ---        | -0.059077 | 0.9999 | -0.151758 | 0.7824 | -0.115541 | 0.9380 | -0.475784 | 0.0305 |
| 10867609 | Tp53inp1   | 0.355013  | 0.9999 | 0.123291  | 0.9276 | 0.378154  | 0.6264 | 0.684654  | 0.0349 |
| 10867693 | LOC500413  | 0.382129  | 0.9999 | -0.761669 | 0.0186 | -0.411551 | 0.5468 | -0.171754 | 0.7577 |
| 10867761 | Mmp16      | 0.165952  | 0.9999 | -0.796942 | 0.0247 | -0.571487 | 0.2949 | -0.338203 | 0.4646 |
| 10868517 | Car9       | 0.181856  | 0.9999 | 0.217089  | 0.4612 | 0.119399  | 0.9123 | 0.412893  | 0.0336 |
| 10868881 | Col15a1    | -0.045193 | 0.9999 | -1.048231 | 0.0017 | -0.919950 | 0.0193 | -0.911910 | 0.0102 |
| 10868935 | Sec61b     | -0.085385 | 0.9999 | -0.256956 | 0.7702 | -0.255293 | 0.8746 | -0.911952 | 0.0120 |
| 10869010 | Zfp189     | -0.079912 | 0.9999 | 0.302932  | 0.6459 | 0.385530  | 0.6502 | 0.699180  | 0.0414 |
| 10869094 | Nipsnap3b  | -0.032818 | 0.9999 | -0.471778 | 0.0627 | -0.393676 | 0.2850 | -0.489366 | 0.0450 |
| 10869106 | Slc44a1    | -0.007871 | 0.9999 | -0.901421 | 0.0000 | -0.665963 | 0.0040 | -0.550775 | 0.0122 |
| 10869249 | Gng10      | -0.083571 | 0.9999 | -0.179379 | 0.6295 | -0.217591 | 0.6683 | -0.457874 | 0.0214 |
| 10869267 | Hsd12      | 0.297782  | 0.9999 | 0.033596  | 0.9815 | 0.206146  | 0.8631 | 0.556422  | 0.0435 |
| 10869282 | RGD1310951 | 0.181178  | 0.9999 | 0.038945  | 0.9519 | 0.297993  | 0.0782 | 0.423713  | 0.0030 |
| 10869574 | Frmd3      | -0.068000 | 0.9999 | 0.649510  | 0.0115 | 0.336935  | 0.5257 | -0.035995 | 0.9553 |
| 10869616 | Ptprd      | 0.152484  | 0.9999 | -0.788605 | 0.0366 | -0.326992 | 0.7978 | -0.011575 | 0.9904 |
| 10869676 | ---        | 0.022684  | 0.9999 | 0.003159  | 0.9959 | -0.004592 | 0.9986 | 0.334877  | 0.0206 |
| 10869737 | ---        | 0.082345  | 0.9999 | -0.814558 | 0.0020 | -0.550908 | 0.1173 | -0.414836 | 0.1641 |
| 10869970 | Fggy       | -0.019945 | 0.9999 | -0.589620 | 0.0404 | -0.478278 | 0.2470 | -0.347773 | 0.2850 |
| 10870043 | Rps18      | -0.153872 | 0.9999 | -0.040255 | 0.9776 | -0.156316 | 0.9275 | -0.751608 | 0.0076 |
| 10870289 | Lepr       | 0.037190  | 0.9999 | -0.228539 | 0.0310 | -0.117835 | 0.6526 | -0.053540 | 0.7680 |
| 10870481 | Ppap2b     | 0.346379  | 0.9999 | -1.524010 | 0.0065 | -0.912759 | 0.3111 | -0.437326 | 0.6056 |
| 10870667 | Yipf1      | 0.162227  | 0.9999 | -0.417768 | 0.0182 | -0.201827 | 0.6484 | -0.095822 | 0.7505 |
| 10870733 | Magoh      | -0.102692 | 0.9999 | -0.073166 | 0.9796 | -0.297013 | 0.9341 | -1.098727 | 0.0471 |
| 10870791 | Orc11      | -0.047812 | 0.9999 | -0.392036 | 0.0600 | -0.387273 | 0.1394 | -0.407570 | 0.0427 |
| 10870847 | Rab3b      | 0.098199  | 0.9999 | -0.827874 | 0.0129 | -0.140520 | 0.9522 | 0.171879  | 0.7680 |
| 10871081 | ---        | -0.026762 | 0.9999 | 0.309125  | 0.0202 | 0.250986  | 0.1663 | 0.126124  | 0.4718 |
| 10871337 | Rps20      | -0.038847 | 0.9999 | -0.028010 | 0.9795 | -0.032857 | 0.9837 | -0.491693 | 0.0190 |
| 10871419 | Tmem53     | 0.211632  | 0.9999 | -0.454395 | 0.0446 | -0.214352 | 0.7498 | -0.012987 | 0.9833 |
| 10871444 | Slc6a9     | 0.079453  | 0.9999 | 0.838624  | 0.0122 | 0.642764  | 0.1521 | 0.687934  | 0.0432 |
| 10871521 | Slc2a1     | 0.203657  | 0.9999 | -0.092697 | 0.8974 | 0.171959  | 0.7913 | 0.462954  | 0.0179 |
| 10872093 | Rpl35a     | -0.153756 | 0.9999 | 0.032089  | 0.9806 | -0.181922 | 0.8754 | -0.803586 | 0.0024 |
| 10872252 | A3galt2    | 0.077506  | 0.9999 | -1.035608 | 0.0180 | -0.568267 | 0.5271 | -0.179031 | 0.8264 |
| 10872307 | Sync       | -0.041747 | 0.9999 | 0.221367  | 0.3936 | 0.120518  | 0.8948 | 0.388219  | 0.0341 |
| 10872326 | Bsdcl      | 0.045652  | 0.9999 | 0.074368  | 0.9252 | 0.135169  | 0.8746 | 0.483995  | 0.0119 |
| 10872531 | Rps20      | -0.033770 | 0.9999 | -0.033720 | 0.9720 | -0.012687 | 0.9946 | -0.414530 | 0.0205 |

|          |              |           |        |           |        |           |        |           |        |
|----------|--------------|-----------|--------|-----------|--------|-----------|--------|-----------|--------|
| 10872585 | Wdtd1        | 0.109368  | 0.9999 | 0.180471  | 0.5622 | 0.239994  | 0.5026 | 0.477023  | 0.0099 |
| 10872808 | Paqr7        | 0.238490  | 0.9999 | 0.124107  | 0.8915 | 0.359357  | 0.4165 | 0.588988  | 0.0201 |
| 10872887 | Myom3        | 0.009942  | 0.9999 | 0.206010  | 0.4781 | 0.305088  | 0.2805 | 0.492481  | 0.0099 |
| 10872972 | Id3          | -0.116918 | 0.9999 | -0.801830 | 0.0498 | -0.842878 | 0.0815 | -0.862310 | 0.0307 |
| 10872991 | Zfp46        | 0.092392  | 0.9999 | -0.100838 | 0.9291 | 0.442722  | 0.2759 | 0.587498  | 0.0307 |
| 10873203 | Ece1         | 0.066463  | 0.9999 | -0.549019 | 0.0408 | -0.300778 | 0.6431 | -0.266483 | 0.4213 |
| 10873325 | ---          | -0.049499 | 0.9999 | 0.019012  | 0.9856 | -0.164422 | 0.8519 | -0.425632 | 0.0467 |
| 10873341 | Pla2g2a      | -0.068368 | 0.9999 | -1.437234 | 0.0013 | -0.614773 | 0.5003 | -0.318474 | 0.6512 |
| 10873606 | Atp13a2      | 0.114113  | 0.9999 | 0.036840  | 0.9716 | 0.274304  | 0.4208 | 0.415031  | 0.0319 |
| 10873649 | Rps21        | -0.111181 | 0.9999 | 0.018046  | 0.9897 | -0.126204 | 0.9539 | -0.628650 | 0.0419 |
| 10873786 | Rps20        | -0.055007 | 0.9999 | -0.045947 | 0.9643 | -0.067793 | 0.9606 | -0.489663 | 0.0143 |
| 10873801 | Pramef8      | 0.043477  | 0.9999 | 0.269240  | 0.6425 | 0.202763  | 0.8938 | 0.676958  | 0.0258 |
| 10873814 | ---          | 0.222817  | 0.9999 | -0.596300 | 0.0367 | -0.521914 | 0.1670 | -0.199793 | 0.6349 |
| 10873916 | Rpl35a       | -0.131338 | 0.9999 | 0.055435  | 0.9590 | -0.173201 | 0.8557 | -0.745314 | 0.0015 |
| 10874198 | Tnfrsf9      | -0.077214 | 0.9999 | -0.354404 | 0.0194 | -0.194802 | 0.5357 | -0.294923 | 0.0570 |
| 10874425 | LOC246295    | 0.033216  | 0.9999 | 0.319920  | 0.0408 | 0.182763  | 0.5996 | 0.303456  | 0.0505 |
| 10874691 | Rps15a       | -0.147197 | 0.9999 | 0.154838  | 0.9106 | -0.141251 | 0.9562 | -0.847099 | 0.0177 |
| 10874740 | Dvl1         | 0.078923  | 0.9999 | 0.318634  | 0.0415 | 0.314362  | 0.1018 | 0.223274  | 0.1824 |
| 10874923 | Tceb1        | -0.062641 | 0.9999 | -0.019867 | 0.9860 | -0.150785 | 0.8946 | -0.459324 | 0.0439 |
| 10874981 | Sulf1        | -0.229920 | 0.9999 | -1.289034 | 0.0194 | -0.745354 | 0.4906 | -0.489911 | 0.5143 |
| 10875267 | Rps20        | -0.035870 | 0.9999 | -0.028707 | 0.9786 | -0.049967 | 0.9732 | -0.501127 | 0.0174 |
| 10875642 | Osgin2       | -0.215452 | 0.9999 | 0.454662  | 0.0404 | 0.300868  | 0.4546 | 0.314938  | 0.1843 |
| 10875936 | Znf292       | 0.188541  | 0.9999 | 0.067946  | 0.9586 | 0.135798  | 0.9427 | 0.564378  | 0.0368 |
| 10875939 | Znf292       | 0.164565  | 0.9999 | 0.070808  | 0.9550 | 0.137778  | 0.9405 | 0.573014  | 0.0321 |
| 10876281 | RGD1311249   | -0.128793 | 0.9999 | 0.366909  | 0.0293 | 0.083125  | 0.9432 | 0.066946  | 0.8303 |
| 10876420 | Rps20        | -0.046423 | 0.9999 | -0.033623 | 0.9767 | -0.051917 | 0.9733 | -0.517573 | 0.0190 |
| 10876531 | ---          | -0.282470 | 0.9999 | 0.399039  | 0.0378 | 0.106536  | 0.9278 | -0.092139 | 0.7805 |
| 10876761 | Olr847       | -0.136476 | 0.9999 | -0.143487 | 0.1176 | -0.162135 | 0.1339 | -0.194020 | 0.0206 |
| 10876838 | Klf4         | 0.038915  | 0.9999 | -0.642146 | 0.0097 | -0.581463 | 0.0505 | -0.392477 | 0.1460 |
| 10877069 | Lpar1        | 0.060172  | 0.9999 | -0.821307 | 0.0021 | -0.679636 | 0.0328 | -0.523718 | 0.0662 |
| 10877446 | Rpl31        | -0.029090 | 0.9999 | 0.098270  | 0.9218 | -0.080477 | 0.9616 | -0.592483 | 0.0174 |
| 10877507 | Dfnb31       | 0.147068  | 0.9999 | 0.408633  | 0.0185 | 0.211507  | 0.5904 | 0.131196  | 0.6082 |
| 10877581 | LOC100362998 | -0.093882 | 0.9999 | 0.031075  | 0.9670 | -0.077314 | 0.9326 | -0.312077 | 0.0290 |
| 10878221 | Dock7        | 0.045621  | 0.9999 | -0.510808 | 0.0190 | -0.276335 | 0.5490 | -0.186071 | 0.5386 |
| 10878428 | Rpl32        | -0.080087 | 0.9999 | 0.033810  | 0.9698 | -0.061370 | 0.9584 | -0.389173 | 0.0223 |
| 10878457 | RGD1559493   | 0.289180  | 0.9999 | 0.535765  | 0.0404 | 0.236280  | 0.7734 | 0.191811  | 0.6111 |
| 10878635 | Gpx7         | -0.024744 | 0.9999 | -0.612601 | 0.0298 | -0.226143 | 0.8411 | -0.288082 | 0.4112 |
| 10878954 | Rps8         | -0.027627 | 0.9999 | 0.035180  | 0.9694 | -0.055543 | 0.9616 | -0.401903 | 0.0205 |
| 10879134 | Ptpnf        | 0.202250  | 0.9999 | -0.628703 | 0.0116 | -0.183009 | 0.8704 | 0.002629  | 0.9968 |
| 10879240 | RGD1308616   | 0.038958  | 0.9999 | 0.063710  | 0.9452 | 0.136898  | 0.8948 | 0.419570  | 0.0443 |
| 10879244 | RGD1308616   | 0.135985  | 0.9999 | 0.173038  | 0.7006 | 0.263754  | 0.5679 | 0.434512  | 0.0419 |
| 10879246 | RGD1308616   | 0.135837  | 0.9999 | 0.107454  | 0.9123 | 0.203486  | 0.8259 | 0.526217  | 0.0337 |
| 10879278 | Tie1         | -0.058323 | 0.9999 | -0.751977 | 0.0196 | -0.547049 | 0.2530 | -0.797630 | 0.0162 |
| 10879392 | Rps27a       | -0.148953 | 0.9999 | 0.062493  | 0.9574 | -0.124030 | 0.9424 | -0.517349 | 0.0350 |
| 10879915 | Rpl37a       | -0.078130 | 0.9999 | -0.012430 | 0.9893 | -0.097167 | 0.9433 | -0.422157 | 0.0324 |
| 10880381 | Eya3         | 0.128872  | 0.9999 | 0.024093  | 0.9767 | 0.058918  | 0.9562 | 0.332811  | 0.0320 |
| 10880408 | Hmgn2        | -0.045525 | 0.9999 | -0.895503 | 0.0124 | -0.836148 | 0.0500 | -1.039752 | 0.0053 |

|          |            |           |        |           |        |           |        |           |        |
|----------|------------|-----------|--------|-----------|--------|-----------|--------|-----------|--------|
| 10880436 | Sh3bgrl3   | 0.058661  | 0.9999 | -0.760489 | 0.0130 | -0.592953 | 0.1487 | -0.624028 | 0.0456 |
| 10880552 | Ldlrap1    | 0.137091  | 0.9999 | -0.497350 | 0.0170 | -0.300192 | 0.4192 | 0.024184  | 0.9636 |
| 10880710 | Ephb2      | 0.085500  | 0.9999 | 0.324480  | 0.5088 | 0.543306  | 0.2008 | 0.683316  | 0.0259 |
| 10880727 | C1qb       | -0.094681 | 0.9999 | -0.708618 | 0.0129 | -0.624162 | 0.0736 | -0.756241 | 0.0101 |
| 10880731 | C1qc       | 0.026756  | 0.9999 | -1.345194 | 0.0015 | -0.950872 | 0.0768 | -1.060486 | 0.0184 |
| 10880734 | C1qa       | 0.042750  | 0.9999 | -1.154781 | 0.0012 | -0.863849 | 0.0459 | -1.010180 | 0.0076 |
| 10880872 | Pla2g5     | -0.031184 | 0.9999 | -1.441640 | 0.0001 | -1.433701 | 0.0003 | -0.951128 | 0.0128 |
| 10881216 | Fhad1      | -0.107985 | 0.9999 | 0.318997  | 0.0084 | 0.185817  | 0.3676 | 0.033547  | 0.8990 |
| 10881253 | Tmem51     | 0.215204  | 0.9999 | 0.748455  | 0.0426 | 0.820599  | 0.0555 | 1.013289  | 0.0064 |
| 10881885 | Vamp3      | 0.047095  | 0.9999 | -0.300767 | 0.0038 | -0.282940 | 0.0198 | -0.185796 | 0.0979 |
| 10882317 | Isg15      | -0.420286 | 0.9999 | -0.832209 | 0.0016 | -0.864243 | 0.0032 | -0.767499 | 0.0064 |
| 10882496 | Galm       | 0.197445  | 0.9999 | -0.089068 | 0.9471 | 0.269618  | 0.7779 | 0.692964  | 0.0200 |
| 10882525 | Tmem178    | 0.010898  | 0.9999 | -0.573145 | 0.0205 | -0.633748 | 0.0241 | -0.483185 | 0.0560 |
| 10882534 | Sgk493     | -0.228754 | 0.9999 | -0.379053 | 0.2488 | -0.689633 | 0.0209 | -0.767340 | 0.0048 |
| 10882659 | Ppm1b      | -0.050512 | 0.9999 | 0.512298  | 0.0191 | 0.430342  | 0.1325 | 0.457817  | 0.0380 |
| 10882773 | Socs5      | -0.036199 | 0.9999 | -0.355035 | 0.0298 | -0.347610 | 0.0782 | -0.417356 | 0.0112 |
| 10882933 | Xdh        | 0.233173  | 0.9999 | -0.831657 | 0.0119 | -0.514001 | 0.3432 | -0.217965 | 0.6765 |
| 10883443 | LOC500625  | 0.021109  | 0.9999 | -0.014284 | 0.9918 | 0.215356  | 0.8738 | 0.641607  | 0.0341 |
| 10883445 | LOC500625  | 0.230108  | 0.9999 | 0.276244  | 0.4917 | 0.352962  | 0.4542 | 0.591351  | 0.0211 |
| 10884215 | Twist1     | 0.049548  | 0.9999 | -0.589078 | 0.0464 | -0.614458 | 0.0804 | -0.758695 | 0.0099 |
| 10884618 | Timm23     | -0.063737 | 0.9999 | 0.048940  | 0.9415 | -0.146137 | 0.7579 | -0.332331 | 0.0310 |
| 10884620 | Rps10      | -0.011400 | 0.9999 | 0.071507  | 0.8806 | -0.003170 | 0.9986 | -0.315540 | 0.0235 |
| 10884656 | Psma6      | -0.019322 | 0.9999 | -0.111287 | 0.8726 | -0.162026 | 0.8509 | -0.474837 | 0.0227 |
| 10884896 | Fau        | -0.048807 | 0.9999 | -0.039603 | 0.9587 | -0.044310 | 0.9698 | -0.328637 | 0.0402 |
| 10884924 | Gsta4      | 0.238573  | 0.9999 | -0.681254 | 0.0191 | -0.400896 | 0.4665 | -0.179895 | 0.7009 |
| 10885193 | Ppm1a      | 0.033234  | 0.9999 | 0.326368  | 0.0234 | 0.293485  | 0.1074 | 0.363395  | 0.0132 |
| 10885205 | Rpl35a     | -0.125239 | 0.9999 | 0.049421  | 0.9678 | -0.171528 | 0.8690 | -0.784777 | 0.0012 |
| 10885299 | Rhoj       | 0.081312  | 0.9999 | -0.801112 | 0.0138 | -0.317620 | 0.7521 | -0.182365 | 0.7404 |
| 10885404 | RGD1309051 | -0.121051 | 0.9999 | 0.503448  | 0.0290 | 0.401419  | 0.2163 | 0.221916  | 0.4518 |
| 10885441 | Churc1     | -0.092036 | 0.9999 | -0.328381 | 0.3592 | -0.222863 | 0.8102 | -0.583591 | 0.0257 |
| 10885769 | Rgs6       | 0.339457  | 0.9999 | -1.051232 | 0.0044 | -0.741605 | 0.1368 | -0.370386 | 0.4506 |
| 10886157 | RGD1309492 | 0.021518  | 0.9999 | 0.244587  | 0.1572 | 0.178547  | 0.6110 | 0.309115  | 0.0419 |
| 10886185 | LOC688717  | -0.057880 | 0.9999 | -0.174997 | 0.8151 | -0.286044 | 0.7053 | -0.565429 | 0.0412 |
| 10886573 | Ifi27      | -0.214406 | 0.9999 | -0.960167 | 0.0280 | -0.880387 | 0.1109 | -1.125429 | 0.0109 |
| 10886671 | Papola     | 0.090181  | 0.9999 | 0.254499  | 0.4518 | 0.219293  | 0.7445 | 0.466817  | 0.0375 |
| 10886693 | Vrk1       | 0.049455  | 0.9999 | -0.181317 | 0.7316 | -0.460128 | 0.1270 | -0.528498 | 0.0247 |
| 10886728 | Hhip1l     | 0.045146  | 0.9999 | 0.509610  | 0.2918 | 1.225043  | 0.0020 | 0.793960  | 0.0341 |
| 10886756 | Evl        | 0.092009  | 0.9999 | -0.508446 | 0.0101 | -0.197891 | 0.7406 | -0.050487 | 0.9069 |
| 10887306 | Tnfaip2    | 0.111729  | 0.9999 | -0.713443 | 0.0237 | -0.612313 | 0.1397 | -0.450004 | 0.1934 |
| 10887481 | ---        | 0.026151  | 0.9999 | -0.383729 | 0.0245 | -0.325379 | 0.1520 | -0.148102 | 0.5250 |
| 10887506 | Siva1      | -0.160015 | 0.9999 | -0.492088 | 0.0522 | -0.559419 | 0.0529 | -0.667038 | 0.0080 |
| 10887719 | Ncapg2     | -0.005119 | 0.9999 | -0.560273 | 0.0373 | -0.469425 | 0.2008 | -0.665284 | 0.0130 |
| 10887947 | Cyp1b1     | 0.046271  | 0.9999 | -0.848617 | 0.0294 | -0.578074 | 0.3754 | -0.449233 | 0.3269 |
| 10887990 | Dhx57      | 0.124988  | 0.9999 | 0.257349  | 0.3439 | 0.273674  | 0.4676 | 0.539483  | 0.0085 |
| 10888021 | Sos1       | 0.050556  | 0.9999 | 0.293079  | 0.4181 | 0.208096  | 0.8213 | 0.552951  | 0.0272 |
| 10888056 | Map4k3     | 0.007043  | 0.9999 | -0.705835 | 0.0003 | -0.427356 | 0.0705 | -0.402157 | 0.0400 |
| 10888301 | Mcf2       | -0.076228 | 0.9999 | -0.209175 | 0.6452 | -0.437702 | 0.1681 | -0.605373 | 0.0111 |

|          |            |           |        |           |        |           |        |           |        |
|----------|------------|-----------|--------|-----------|--------|-----------|--------|-----------|--------|
| 10888612 | Ypel5      | 0.182274  | 0.9999 | 0.207450  | 0.4382 | 0.245926  | 0.4665 | 0.479746  | 0.0090 |
| 10888953 | Emilin1    | 0.188323  | 0.9999 | -0.765057 | 0.0288 | -0.197079 | 0.9278 | -0.070716 | 0.9286 |
| 10888998 | Mapre3     | 0.164828  | 0.9999 | 0.359837  | 0.0694 | 0.296078  | 0.3171 | 0.500014  | 0.0095 |
| 10889228 | Mycn       | -0.019469 | 0.9999 | -0.446282 | 0.0157 | -0.353318 | 0.1567 | -0.337772 | 0.0787 |
| 10889269 | Lpin1      | 0.321568  | 0.9999 | 0.186236  | 0.8779 | 0.564463  | 0.3089 | 0.951234  | 0.0090 |
| 10889590 | Prkar2b    | 0.185801  | 0.9999 | -0.699231 | 0.0453 | -0.385239 | 0.6502 | 0.056125  | 0.9457 |
| 10889772 | Stxbp6     | -0.051195 | 0.9999 | -0.727437 | 0.0278 | -0.420439 | 0.5341 | -0.122207 | 0.8473 |
| 10889961 | Cfl2       | -0.171963 | 0.9999 | 0.430547  | 0.0423 | 0.241017  | 0.6313 | 0.120693  | 0.7234 |
| 10890299 | Rpl10a     | -0.055307 | 0.9999 | -0.114970 | 0.7272 | -0.177413 | 0.5909 | -0.349050 | 0.0190 |
| 10890860 | Actn1      | -0.474972 | 0.9999 | 0.855103  | 0.0144 | 0.629255  | 0.2007 | 0.182804  | 0.7639 |
| 10890891 | Dcaf5      | 0.064351  | 0.9999 | 0.466259  | 0.0931 | 0.464433  | 0.1902 | 0.602132  | 0.0205 |
| 10891039 | Numb       | 0.019587  | 0.9999 | 0.290653  | 0.2520 | 0.289487  | 0.4247 | 0.475121  | 0.0206 |
| 10891120 | Aldh6a1    | 0.194438  | 0.9999 | -0.763694 | 0.0475 | -0.308001 | 0.8315 | 0.132194  | 0.8579 |
| 10891160 | Npc2       | -0.028940 | 0.9999 | -0.330642 | 0.0404 | -0.067317 | 0.9508 | -0.083785 | 0.7563 |
| 10891203 | RGD1307597 | 0.117903  | 0.9999 | 0.125396  | 0.6465 | 0.147718  | 0.7027 | 0.305304  | 0.0317 |
| 10891240 | Pgf        | 0.148825  | 0.9999 | 0.827243  | 0.3155 | 1.606546  | 0.0217 | 1.157719  | 0.0685 |
| 10891561 | Eml5       | 0.090760  | 0.9999 | 0.128413  | 0.5057 | 0.319206  | 0.0190 | 0.178348  | 0.1749 |
| 10891880 | Prima1     | 0.176252  | 0.9999 | 0.160077  | 0.6961 | 0.716929  | 0.0004 | 0.307617  | 0.1399 |
| 10892074 | RGD1304878 | 0.028510  | 0.9999 | 0.321100  | 0.2101 | 0.329614  | 0.3387 | 0.502756  | 0.0197 |
| 10892309 | RGD1310269 | 0.278924  | 0.9999 | -1.361131 | 0.0052 | -1.246016 | 0.0298 | -0.649335 | 0.2549 |
| 10892381 | Nudt14     | 0.088952  | 0.9999 | -0.820313 | 0.0031 | -0.657030 | 0.0529 | -0.489178 | 0.1051 |
| 10892702 | Rpl32      | -0.079977 | 0.9999 | 0.031553  | 0.9737 | -0.064170 | 0.9562 | -0.396270 | 0.0214 |
| 10892835 | Itgb8      | -0.032432 | 0.9999 | -0.972512 | 0.0120 | -0.531898 | 0.4733 | -0.199050 | 0.7685 |
| 10892937 | Rps19      | -0.175042 | 0.9999 | 0.075999  | 0.9517 | -0.177631 | 0.8956 | -0.591738 | 0.0299 |
| 10893067 | Stat2      | -0.043392 | 0.9999 | -0.711372 | 0.0100 | -0.634363 | 0.0568 | -0.205401 | 0.6218 |
| 10893586 | Mrpl54     | -0.118325 | 0.9999 | -0.093078 | 0.8280 | -0.214566 | 0.4333 | -0.488543 | 0.0019 |
| 10893863 | Adamts15   | -0.191580 | 0.9999 | 0.585834  | 0.0278 | 0.216517  | 0.8337 | -0.122503 | 0.7962 |
| 10893899 | Gamt       | 0.085787  | 0.9999 | -0.798655 | 0.0112 | -0.261821 | 0.8315 | -0.138394 | 0.8122 |
| 10894695 | Igf1       | -0.022700 | 0.9999 | -1.336095 | 0.0242 | -0.745798 | 0.5545 | -0.555094 | 0.4749 |
| 10894939 | RGD1565947 | -0.078337 | 0.9999 | -0.259156 | 0.8250 | -0.649575 | 0.3311 | -0.830044 | 0.0500 |
| 10895083 | Lum        | -0.106664 | 0.9999 | -2.346478 | 0.0001 | -1.601718 | 0.0217 | -1.456632 | 0.0197 |
| 10895406 | Phlda1     | -0.108945 | 0.9999 | 0.009984  | 0.9952 | -0.551692 | 0.2978 | -0.695784 | 0.0448 |
| 10895766 | Fam19a2    | -0.048743 | 0.9999 | -0.442198 | 0.0591 | -0.414331 | 0.1741 | -0.450655 | 0.0469 |
| 10895797 | Cdk4       | 0.117050  | 0.9999 | -0.306340 | 0.0183 | -0.181893 | 0.4455 | -0.111377 | 0.5348 |
| 10896263 | Cthrc1     | -0.026948 | 0.9999 | -1.119418 | 0.0217 | 0.085300  | 0.9814 | -0.122633 | 0.9074 |
| 10896836 | Efr3a      | 0.194399  | 0.9999 | -0.119772 | 0.8895 | 0.169150  | 0.8790 | 0.484428  | 0.0456 |
| 10896935 | Wisp1      | 0.017448  | 0.9999 | 0.699736  | 0.2276 | 1.177402  | 0.0296 | 1.283690  | 0.0084 |
| 10896948 | Khdrbs3    | 0.202444  | 0.9999 | 0.666386  | 0.0332 | 0.824101  | 0.0185 | 1.017580  | 0.0015 |
| 10897400 | LOC686765  | -0.150867 | 0.9999 | -0.228122 | 0.3333 | -0.115174 | 0.8970 | -0.394849 | 0.0255 |
| 10897802 | Rpl22      | -0.045408 | 0.9999 | -0.063776 | 0.9495 | -0.166956 | 0.8587 | -0.472165 | 0.0324 |
| 10897868 | Sgsm3      | 0.062737  | 0.9999 | 0.244278  | 0.5104 | 0.423081  | 0.1772 | 0.461373  | 0.0470 |
| 10898268 | Arhgap8    | -0.094251 | 0.9999 | -0.418895 | 0.0475 | -0.412567 | 0.1166 | -0.136740 | 0.6696 |
| 10898368 | Ttc38      | 0.211116  | 0.9999 | -0.734940 | 0.0297 | -0.286500 | 0.8118 | 0.083450  | 0.9080 |
| 10899053 | ---        | -0.319438 | 0.9999 | -0.178911 | 0.5667 | -0.145977 | 0.8402 | -0.487185 | 0.0084 |
| 10899354 | Acvrl1     | -0.219037 | 0.9999 | -0.782946 | 0.0021 | -0.590848 | 0.0660 | -0.586007 | 0.0293 |
| 10899396 | RGD1359310 | 0.072328  | 0.9999 | 0.247316  | 0.4090 | 0.239260  | 0.6350 | 0.497807  | 0.0184 |
| 10899531 | Pfdn5      | -0.095806 | 0.9999 | -0.080139 | 0.9517 | -0.182330 | 0.9033 | -0.564725 | 0.0500 |



|          |           |           |        |           |        |           |        |           |        |
|----------|-----------|-----------|--------|-----------|--------|-----------|--------|-----------|--------|
| 10899824 | Rpl41     | -0.072213 | 0.9999 | 0.066197  | 0.9475 | -0.061983 | 0.9698 | -0.567947 | 0.0111 |
| 10899913 | Dgka      | 0.082992  | 0.9999 | 0.184542  | 0.4626 | 0.281607  | 0.2368 | 0.347295  | 0.0349 |
| 10899947 | Gdf11     | 0.272644  | 0.9999 | 0.058802  | 0.9407 | 0.293975  | 0.2721 | 0.406070  | 0.0235 |
| 10900358 | Gadd45b   | -0.097260 | 0.9999 | 0.787100  | 0.0013 | 0.677530  | 0.0183 | 0.469173  | 0.0707 |
| 10900583 | Cirbp     | 0.093662  | 0.9999 | -0.925231 | 0.0048 | -0.535223 | 0.3111 | -0.412711 | 0.2912 |
| 10900651 | Abca7     | -0.097107 | 0.9999 | -0.132922 | 0.8734 | 0.514483  | 0.0970 | 0.758884  | 0.0030 |
| 10900782 | Fstl3     | -0.366093 | 0.9999 | 1.843254  | 0.0002 | 2.046346  | 0.0001 | 1.649974  | 0.0015 |
| 10901251 | Rps20     | -0.052127 | 0.9999 | -0.038650 | 0.9692 | -0.040107 | 0.9763 | -0.445280 | 0.0190 |
| 10901842 | Nedd1     | -0.004851 | 0.9999 | 0.460034  | 0.1304 | 0.386310  | 0.4270 | 0.569541  | 0.0372 |
| 10902467 | LOC499782 | -0.040440 | 0.9999 | -0.002597 | 0.9976 | -0.073083 | 0.9499 | -0.446977 | 0.0101 |
| 10902524 | Frs2      | 0.050588  | 0.9999 | 0.074857  | 0.9519 | 0.211623  | 0.8488 | 0.586828  | 0.0300 |
| 10902694 | ---       | -0.373077 | 0.9999 | -0.386825 | 0.1057 | -0.339652 | 0.3363 | -0.613721 | 0.0064 |
| 10902765 | Srgap1    | -0.109657 | 0.9999 | -0.582274 | 0.0053 | -0.211045 | 0.7475 | -0.085679 | 0.8325 |
| 10902952 | Dtx3      | 0.100139  | 0.9999 | 0.388959  | 0.0369 | 0.233267  | 0.5350 | 0.159411  | 0.5194 |
| 10903061 | Shmt2     | -0.189318 | 0.9999 | 0.471039  | 0.0296 | 0.261033  | 0.5894 | 0.150342  | 0.6444 |
| 10903216 | Rpl30     | 0.018073  | 0.9999 | 0.027353  | 0.9536 | -0.098507 | 0.7482 | -0.206587 | 0.0426 |
| 10903234 | Nipal2    | 0.002525  | 0.9999 | -0.572282 | 0.0188 | -0.532014 | 0.0728 | -0.176120 | 0.6312 |
| 10903725 | Tnfrsf11b | -0.202727 | 0.9999 | -1.359668 | 0.0298 | -1.136221 | 0.1822 | -0.758149 | 0.2912 |
| 10903977 | ---       | -0.086493 | 0.9999 | 0.462358  | 0.0405 | 0.265100  | 0.5963 | 0.104023  | 0.7902 |
| 10904334 | Trappc9   | 0.134450  | 0.9999 | -0.674713 | 0.0395 | -0.439340 | 0.4666 | -0.324173 | 0.4242 |
| 10904653 | Naprt1    | 0.110426  | 0.9999 | -0.735422 | 0.0154 | -0.223381 | 0.8704 | -0.009322 | 0.9907 |
| 10904864 | ---       | 0.111363  | 0.9999 | -0.407022 | 0.0219 | -0.330346 | 0.1716 | -0.122453 | 0.6530 |
| 10905128 | Porf-2    | 0.158958  | 0.9999 | -0.448810 | 0.0109 | -0.089761 | 0.9427 | 0.022909  | 0.9590 |
| 10905177 | ---       | -0.507644 | 0.9999 | -0.752973 | 0.2443 | -1.396939 | 0.0183 | -0.648201 | 0.2804 |
| 10905179 | Apol9a    | -0.340387 | 0.9999 | -0.635262 | 0.0622 | -0.910153 | 0.0125 | -0.714766 | 0.0299 |
| 10905277 | Pvalb     | -0.061771 | 0.9999 | -0.539548 | 0.0144 | -0.141194 | 0.9060 | -0.088326 | 0.8320 |
| 10905307 | Clqtnf6   | 0.229124  | 0.9999 | -1.227310 | 0.0048 | -0.830601 | 0.1741 | -0.588691 | 0.2470 |
| 10905439 | Csnk1e    | 0.140328  | 0.9999 | 0.112432  | 0.8188 | 0.232503  | 0.5242 | 0.363003  | 0.0435 |
| 10905558 | Rpl26     | -0.190557 | 0.9999 | -0.008853 | 0.9941 | -0.121177 | 0.9443 | -0.538844 | 0.0312 |
| 10905560 | Mkl1      | 0.071451  | 0.9999 | 0.440311  | 0.0191 | 0.315910  | 0.2582 | 0.144282  | 0.6025 |
| 10906373 | Cpne8     | 0.186283  | 0.9999 | -0.227613 | 0.8103 | 0.237633  | 0.8931 | 0.789085  | 0.0259 |
| 10906391 | Kif21a    | -0.039327 | 0.9999 | 0.081503  | 0.9312 | 0.218060  | 0.7442 | 0.477598  | 0.0326 |
| 10906608 | Slc38a2   | 0.005210  | 0.9999 | 0.208963  | 0.4572 | 0.192070  | 0.7053 | 0.385963  | 0.0375 |
| 10906626 | Slc38a4   | 0.097400  | 0.9999 | 0.578160  | 0.1158 | 0.756201  | 0.0568 | 0.782811  | 0.0205 |
| 10906679 | Rapgef3   | -0.027582 | 0.9999 | -0.526592 | 0.0234 | -0.287397 | 0.5734 | -0.193569 | 0.5512 |
| 10907542 | Csad      | -0.048386 | 0.9999 | -0.551498 | 0.0194 | -0.225657 | 0.7606 | -0.062923 | 0.9022 |
| 10907637 | Calcoco1  | 0.213818  | 0.9999 | 0.030919  | 0.9828 | 0.267939  | 0.7261 | 0.533620  | 0.0458 |
| 10907689 | Itga5     | -0.224275 | 0.9999 | 0.594357  | 0.0588 | 0.766212  | 0.0241 | 0.463842  | 0.1524 |
| 10907763 | Uhrf1bp11 | 0.004134  | 0.9999 | 0.879897  | 0.0008 | 0.541284  | 0.1183 | 0.401171  | 0.1765 |
| 10908248 | Zfp426l2  | 0.098626  | 0.9999 | -0.057776 | 0.9530 | 0.024445  | 0.9904 | 0.418040  | 0.0498 |
| 10908369 | Slc44a2   | 0.239097  | 0.9999 | -0.852749 | 0.0079 | -0.359257 | 0.6733 | 0.001163  | 0.9987 |
| 10908562 | Lppr2     | 0.285947  | 0.9999 | 0.133383  | 0.7266 | 0.296440  | 0.2209 | 0.359629  | 0.0347 |
| 10908596 | Cnn1      | -1.357938 | 0.9999 | 1.490972  | 0.0326 | 1.056503  | 0.3454 | 0.351897  | 0.7680 |
| 10908645 | Bmper     | 0.075353  | 0.9999 | -1.198118 | 0.0004 | -0.852254 | 0.0301 | -1.118370 | 0.0018 |
| 10908776 | Adamts8   | -0.286611 | 0.9999 | 2.119147  | 0.0000 | 1.789629  | 0.0009 | 1.068754  | 0.0388 |
| 10908788 | Zbtb44    | 0.036419  | 0.9999 | 0.344584  | 0.1257 | 0.408967  | 0.1124 | 0.560732  | 0.0070 |
| 10908810 | ---       | 0.119005  | 0.9999 | 0.176216  | 0.8827 | 0.225730  | 0.8970 | 0.728565  | 0.0345 |

|          |            |           |        |           |        |           |        |           |        |
|----------|------------|-----------|--------|-----------|--------|-----------|--------|-----------|--------|
| 10908833 | Nfrkb      | 0.094737  | 0.9999 | 0.283175  | 0.3315 | 0.236385  | 0.6770 | 0.463358  | 0.0341 |
| 10909470 | Dpagt1     | 0.114117  | 0.9999 | -0.332188 | 0.0160 | -0.342379 | 0.0303 | -0.050098 | 0.8539 |
| 10909480 | H2afx      | -0.122327 | 0.9999 | -0.253260 | 0.3320 | -0.395579 | 0.1074 | -0.454965 | 0.0205 |
| 10909621 | Scn4b      | 0.579959  | 0.9999 | -1.591433 | 0.0025 | -1.061049 | 0.1394 | -0.697896 | 0.2618 |
| 10909758 | Rps21      | -0.017467 | 0.9999 | 0.020420  | 0.9888 | -0.098277 | 0.9624 | -0.677831 | 0.0307 |
| 10909874 | Il18       | -0.116460 | 0.9999 | -0.517565 | 0.0475 | -0.392119 | 0.3415 | -0.235267 | 0.4812 |
| 10909892 | Cryab      | -0.094557 | 0.9999 | 0.278173  | 0.0111 | 0.054897  | 0.9433 | 0.053890  | 0.7817 |
| 10910094 | Ireb2      | 0.057734  | 0.9999 | 0.035930  | 0.9760 | 0.189257  | 0.7968 | 0.438862  | 0.0403 |
| 10910406 | Sema7a     | 0.136388  | 0.9999 | 0.347287  | 0.5537 | 0.677076  | 0.1271 | 1.106751  | 0.0019 |
| 10910458 | Rpl38      | -0.040517 | 0.9999 | 0.017847  | 0.9806 | -0.144447 | 0.7159 | -0.343543 | 0.0170 |
| 10910473 | Hcn4       | 0.331043  | 0.9999 | 0.217156  | 0.7769 | 0.267752  | 0.8033 | 0.799450  | 0.0105 |
| 10910617 | ---        | -0.048717 | 0.9999 | -0.044843 | 0.9241 | -0.081507 | 0.8720 | -0.244193 | 0.0324 |
| 10910805 | ---        | 0.044152  | 0.9999 | 0.247676  | 0.3446 | 0.224313  | 0.6306 | 0.398027  | 0.0402 |
| 10911010 | Ns5atp9    | -0.092333 | 0.9999 | -1.125472 | 0.1368 | -1.053944 | 0.3229 | -1.594318 | 0.0196 |
| 10911795 | LOC499782  | -0.025050 | 0.9999 | -0.031703 | 0.9692 | -0.086720 | 0.9278 | -0.449060 | 0.0045 |
| 10911849 | ---        | -0.327045 | 0.9999 | -0.270163 | 0.1984 | -0.289106 | 0.2786 | -0.384162 | 0.0308 |
| 10911859 | Senp6      | 0.025645  | 0.9999 | 0.189632  | 0.6027 | 0.227984  | 0.6484 | 0.417609  | 0.0378 |
| 10911936 | Sh3bgrl2   | 0.170490  | 0.9999 | 0.468539  | 0.0111 | 0.466073  | 0.0279 | 0.524022  | 0.0064 |
| 10911997 | ---        | -0.137714 | 0.9999 | -0.124873 | 0.6402 | -0.188551 | 0.4796 | -0.343049 | 0.0160 |
| 10911999 | Rps20      | -0.037827 | 0.9999 | -0.014687 | 0.9877 | -0.016547 | 0.9932 | -0.428187 | 0.0338 |
| 10912003 | Tpbp       | -0.076222 | 0.9999 | -0.385372 | 0.1006 | -0.231862 | 0.6832 | -0.460490 | 0.0341 |
| 10912112 | Bcl2a1d    | -0.046188 | 0.9999 | -0.091346 | 0.9000 | -0.181303 | 0.7606 | -0.383054 | 0.0498 |
| 10912174 | Adamts7    | 0.181953  | 0.9999 | -0.631807 | 0.0124 | -0.223551 | 0.8033 | 0.026762  | 0.9669 |
| 10912218 | Plscr1     | -0.021719 | 0.9999 | -0.641865 | 0.0278 | -0.487743 | 0.2541 | -0.566850 | 0.0538 |
| 10912289 | RGD1560736 | 0.087950  | 0.9999 | -0.964485 | 0.0017 | -0.853011 | 0.0189 | -0.740710 | 0.0215 |
| 10912581 | Anapc13    | -0.050173 | 0.9999 | -0.179116 | 0.6181 | -0.287256 | 0.3835 | -0.471866 | 0.0170 |
| 10912614 | Slco2a1    | -0.075142 | 0.9999 | -1.721484 | 0.0000 | -1.533627 | 0.0000 | -1.253999 | 0.0005 |
| 10912629 | ---        | -0.001175 | 0.9999 | -1.680147 | 0.0000 | -1.476612 | 0.0000 | -1.361403 | 0.0000 |
| 10912917 | Cacna2d2   | 0.137488  | 0.9999 | -0.802809 | 0.0176 | -0.541378 | 0.3044 | -0.179061 | 0.7580 |
| 10913023 | Ifrd2      | -0.019488 | 0.9999 | 0.469454  | 0.0287 | 0.300625  | 0.4315 | 0.209989  | 0.4399 |
| 10913256 | Nckipsd    | 0.335508  | 0.9999 | 0.046854  | 0.9707 | 0.253836  | 0.6936 | 0.572291  | 0.0187 |
| 10913538 | Spink8     | -0.307612 | 0.9999 | 0.158094  | 0.8949 | -0.230900 | 0.8738 | -0.652209 | 0.0449 |
| 10913620 | Cspg5      | 0.454499  | 0.9999 | -0.389896 | 0.3311 | 0.580768  | 0.1381 | 0.700847  | 0.0205 |
| 10913691 | Setd2      | 0.035029  | 0.9999 | 0.063743  | 0.9439 | 0.226921  | 0.6625 | 0.421095  | 0.0403 |
| 10913760 | Tessp6     | 0.011319  | 0.9999 | 0.392499  | 0.2014 | 0.733800  | 0.0107 | 0.181811  | 0.6404 |
| 10914308 | Rpsa       | -0.079977 | 0.9999 | 0.007327  | 0.9918 | -0.111810 | 0.8841 | -0.335813 | 0.0380 |
| 10914366 | Rpl14      | -0.002890 | 0.9999 | 0.001397  | 0.9981 | -0.072643 | 0.9278 | -0.259310 | 0.0448 |
| 10914424 | Hhat1      | 0.254432  | 0.9999 | -1.104987 | 0.0034 | -0.633466 | 0.2898 | -0.246311 | 0.6914 |
| 10914849 | Rpl13      | -0.056507 | 0.9999 | 0.048203  | 0.9388 | -0.029900 | 0.9766 | -0.302343 | 0.0326 |
| 10915968 | Rpl32      | -0.085700 | 0.9999 | 0.024947  | 0.9773 | -0.075873 | 0.9482 | -0.379487 | 0.0261 |
| 10916016 | St3gal4    | -0.035029 | 0.9999 | -0.871607 | 0.0051 | -0.777295 | 0.0350 | -0.829608 | 0.0111 |
| 10916567 | Tbcel      | 0.119596  | 0.9999 | 0.453544  | 0.0475 | 0.492890  | 0.0661 | 0.384396  | 0.0971 |
| 10916598 | Arhgef12   | 0.213567  | 0.9999 | 0.257267  | 0.3235 | 0.349636  | 0.1963 | 0.493705  | 0.0128 |
| 10916664 | Rnf26      | -0.035280 | 0.9999 | -0.179015 | 0.4233 | -0.351635 | 0.0508 | -0.390651 | 0.0117 |
| 10916920 | Atp5l      | -0.318134 | 0.9999 | -0.143317 | 0.9105 | -0.210139 | 0.9011 | -0.655680 | 0.0448 |
| 10916981 | Cep164     | 0.165855  | 0.9999 | 0.323002  | 0.1773 | 0.298484  | 0.3995 | 0.490264  | 0.0187 |
| 10917260 | Dixdc1     | 0.186600  | 0.9999 | 0.108362  | 0.9196 | 0.571764  | 0.0721 | 0.690149  | 0.0099 |

|          |            |           |        |           |        |           |        |           |        |
|----------|------------|-----------|--------|-----------|--------|-----------|--------|-----------|--------|
| 10917299 | RGD1561984 | -0.042449 | 0.9999 | 0.027906  | 0.9835 | -0.108097 | 0.9562 | -0.582280 | 0.0324 |
| 10917448 | Acat1      | 0.072473  | 0.9999 | -0.576500 | 0.0199 | -0.385233 | 0.3420 | -0.359312 | 0.1879 |
| 10917645 | Scaper     | 0.049988  | 0.9999 | -0.664950 | 0.0130 | -0.362837 | 0.4904 | -0.172890 | 0.6846 |
| 10917770 | Mpi        | 0.059748  | 0.9999 | -0.079478 | 0.9307 | 0.075478  | 0.9601 | 0.440519  | 0.0427 |
| 10917924 | Neo1       | 0.125509  | 0.9999 | 0.648767  | 0.0035 | 0.446349  | 0.1394 | 0.412958  | 0.0830 |
| 10918027 | Rplp1      | -0.046150 | 0.9999 | -0.029680 | 0.9519 | -0.121687 | 0.6392 | -0.224570 | 0.0343 |
| 10918089 | Fem1b      | 0.034584  | 0.9999 | 0.183701  | 0.6687 | 0.337862  | 0.3089 | 0.564759  | 0.0096 |
| 10918342 | Fbxl22     | -0.289041 | 0.9999 | -0.531306 | 0.5013 | -1.180138 | 0.0408 | -0.826397 | 0.1133 |
| 10918657 | Pigb       | 0.021463  | 0.9999 | -0.063934 | 0.9202 | 0.053526  | 0.9606 | 0.379334  | 0.0167 |
| 10918955 | Filip1     | -0.254793 | 0.9999 | 0.650861  | 0.0380 | 0.502920  | 0.2786 | 0.332818  | 0.3762 |
| 10919103 | Me1        | 0.150738  | 0.9999 | 0.378436  | 0.0475 | 0.265733  | 0.4173 | 0.411130  | 0.0280 |
| 10919118 | Snap91     | -0.478356 | 0.9999 | 1.115136  | 0.0031 | 0.371104  | 0.7606 | -0.094563 | 0.9106 |
| 10919283 | Tbc1d2b    | 0.151024  | 0.9999 | -0.553639 | 0.0221 | -0.332259 | 0.4679 | -0.168662 | 0.6482 |
| 10919375 | Rpl31      | -0.015163 | 0.9999 | 0.106023  | 0.9272 | -0.078567 | 0.9693 | -0.629933 | 0.0228 |
| 10919453 | Pik3cb     | -0.150972 | 0.9999 | 0.726458  | 0.0037 | 0.544761  | 0.0893 | 0.527979  | 0.0435 |
| 10919557 | Pccb       | 0.026526  | 0.9999 | -0.376306 | 0.0125 | -0.224177 | 0.3884 | -0.039807 | 0.9037 |
| 10920148 | Sema3f     | 0.008850  | 0.9999 | -0.416064 | 0.0203 | -0.284892 | 0.3143 | -0.269914 | 0.1693 |
| 10920283 | Bsn        | 0.084937  | 0.9999 | 0.276074  | 0.0451 | 0.138599  | 0.7097 | 0.039390  | 0.8883 |
| 10920743 | ---        | 0.156665  | 0.9999 | -0.938399 | 0.0353 | -0.596503 | 0.4728 | -0.842899 | 0.0579 |
| 10920745 | Tgfb2      | 0.127862  | 0.9999 | -0.611160 | 0.0219 | -0.266726 | 0.7347 | -0.062432 | 0.9147 |
| 10920754 | Rbms3      | -0.005300 | 0.9999 | -0.885706 | 0.0061 | -0.429748 | 0.5289 | -0.123562 | 0.8483 |
| 10920797 | Cmc1       | -0.115391 | 0.9999 | -0.261031 | 0.4008 | -0.347947 | 0.2949 | -0.486458 | 0.0257 |
| 10920841 | Oxsr1      | -0.013084 | 0.9999 | 0.237671  | 0.4858 | 0.204095  | 0.7625 | 0.553333  | 0.0123 |
| 10921059 | Zfp651     | 0.190609  | 0.9999 | 0.342661  | 0.0415 | 0.369686  | 0.0598 | 0.402447  | 0.0167 |
| 10921288 | Rps20      | -0.043233 | 0.9999 | -0.034490 | 0.9760 | -0.050893 | 0.9732 | -0.498250 | 0.0166 |
| 10921444 | Tomm6      | -0.077712 | 0.9999 | -0.052800 | 0.9659 | -0.286594 | 0.5846 | -0.616149 | 0.0102 |
| 10921645 | LOC680835  | 0.038175  | 0.9999 | -0.511800 | 0.0014 | 0.011916  | 0.9946 | 0.063324  | 0.8419 |
| 10922060 | ---        | -0.147972 | 0.9999 | -0.016187 | 0.9832 | -0.121032 | 0.8414 | -0.303539 | 0.0448 |
| 10922113 | Paqr8      | 0.106405  | 0.9999 | -0.513114 | 0.0167 | -0.185413 | 0.8102 | -0.086283 | 0.8311 |
| 10922826 | Il1r1      | 0.049048  | 0.9999 | -0.872126 | 0.0042 | -0.552283 | 0.2163 | -0.315900 | 0.4287 |
| 10923052 | Col3a1     | -0.054205 | 0.9999 | -1.204753 | 0.0060 | -0.303444 | 0.8938 | -0.472907 | 0.4000 |
| 10923191 | Mfsd6      | 0.119480  | 0.9999 | 0.271801  | 0.5127 | 0.315729  | 0.5786 | 0.593090  | 0.0216 |
| 10923237 | Myo1b      | 0.163431  | 0.9999 | -0.674929 | 0.0091 | -0.378860 | 0.4099 | -0.014598 | 0.9841 |
| 10923345 | Hspe1      | -0.014473 | 0.9999 | 0.020623  | 0.9806 | -0.110567 | 0.8831 | -0.379873 | 0.0187 |
| 10923799 | Cd28       | 0.111168  | 0.9999 | -0.570566 | 0.0248 | -0.056775 | 0.9746 | 0.229965  | 0.4988 |
| 10923855 | Rpl37      | -0.056663 | 0.9999 | 0.011833  | 0.9898 | -0.107807 | 0.9432 | -0.519333 | 0.0182 |
| 10923857 | Eef1b2     | -0.044284 | 0.9999 | 0.120921  | 0.9236 | -0.030095 | 0.9925 | -0.702390 | 0.0216 |
| 10924217 | Rpl37a     | -0.055273 | 0.9999 | 0.000923  | 0.9993 | -0.075713 | 0.9482 | -0.413983 | 0.0177 |
| 10924853 | Itm2c      | 0.084585  | 0.9999 | -0.468528 | 0.0015 | -0.239236 | 0.3311 | -0.044035 | 0.8931 |
| 10924930 | Dis3l2     | 0.163128  | 0.9999 | -0.714018 | 0.0194 | -0.403184 | 0.5152 | -0.171108 | 0.7394 |
| 10925158 | Ugt1a5     | -0.006296 | 0.9999 | -0.398214 | 0.0144 | -0.346858 | 0.0858 | -0.356975 | 0.0309 |
| 10926752 | ---        | -0.147972 | 0.9999 | -0.016187 | 0.9832 | -0.121032 | 0.8414 | -0.303539 | 0.0448 |
| 10926948 | LOC684534  | 0.103287  | 0.9999 | 0.424214  | 0.2604 | 0.745893  | 0.0289 | 0.713533  | 0.0190 |
| 10926958 | Gsta3      | 0.039255  | 0.9999 | -0.666999 | 0.0573 | -0.781691 | 0.0488 | -0.882517 | 0.0103 |
| 10927230 | Bag2       | -0.119338 | 0.9999 | 0.653870  | 0.0164 | 0.515458  | 0.1650 | 0.439101  | 0.1339 |
| 10927413 | Actr1b     | -0.041862 | 0.9999 | 0.306359  | 0.0367 | 0.276829  | 0.1439 | 0.169768  | 0.3136 |
| 10927610 | ---        | -0.146678 | 0.9999 | 0.046068  | 0.9762 | -0.155987 | 0.9278 | -0.655748 | 0.0190 |

|          |            |           |        |           |        |           |        |           |        |
|----------|------------|-----------|--------|-----------|--------|-----------|--------|-----------|--------|
| 10927680 | Tgfbra1    | 0.024042  | 0.9999 | 0.257188  | 0.2913 | 0.086553  | 0.9467 | 0.443737  | 0.0195 |
| 10927803 | ---        | -0.158224 | 0.9999 | -0.213472 | 0.7546 | -0.480268 | 0.2582 | -0.644499 | 0.0259 |
| 10927842 | Stat1      | 0.085886  | 0.9999 | -0.957427 | 0.0093 | -0.562623 | 0.3681 | -0.119748 | 0.8752 |
| 10928307 | Trak2      | 0.034353  | 0.9999 | 0.104056  | 0.8961 | 0.143276  | 0.8938 | 0.522285  | 0.0169 |
| 10928452 | Raph1      | 0.150345  | 0.9999 | -0.646663 | 0.0129 | -0.051074 | 0.9781 | 0.224088  | 0.5352 |
| 10928761 | Fn1        | 0.009483  | 0.9999 | -0.704485 | 0.0476 | -0.175430 | 0.9424 | -0.057760 | 0.9451 |
| 10928837 | Igfbp5     | 0.693750  | 0.9999 | -1.347702 | 0.0038 | -0.643436 | 0.4964 | 0.033032  | 0.9799 |
| 10928855 | Tns1       | -0.153710 | 0.9999 | 0.637609  | 0.0272 | 0.339970  | 0.6117 | 0.193941  | 0.6619 |
| 10928902 | Tmbim1     | -0.097045 | 0.9999 | 1.120685  | 0.0000 | 0.923467  | 0.0005 | 0.676237  | 0.0098 |
| 10929054 | RGD735175  | 0.156725  | 0.9999 | 0.334006  | 0.1512 | 0.276349  | 0.4802 | 0.451797  | 0.0285 |
| 10929063 | Abcb6      | -0.033216 | 0.9999 | 0.507932  | 0.0406 | 0.272789  | 0.6526 | 0.081600  | 0.8665 |
| 10929288 | Serpine2   | 0.216840  | 0.9999 | -0.714682 | 0.0194 | -0.273119 | 0.7968 | -0.292252 | 0.4672 |
| 10929396 | Col4a4     | -0.075394 | 0.9999 | -0.696638 | 0.0007 | -0.340651 | 0.3026 | -0.071579 | 0.8670 |
| 10929458 | Sphkap     | 0.442136  | 0.9999 | -1.081629 | 0.0035 | -0.371574 | 0.7507 | 0.127315  | 0.8688 |
| 10929766 | Col6a3     | 0.065757  | 0.9999 | -1.564039 | 0.0059 | -0.720053 | 0.5796 | -0.926637 | 0.1393 |
| 10930259 | Rab31      | 0.110644  | 0.9999 | -0.438083 | 0.0429 | -0.338225 | 0.3016 | -0.274950 | 0.2503 |
| 10930301 | Twsg1      | 0.085319  | 0.9999 | 0.368410  | 0.1178 | 0.550766  | 0.0220 | 0.739335  | 0.0010 |
| 10930340 | Rab12      | 0.084391  | 0.9999 | 0.082578  | 0.7494 | 0.093787  | 0.8132 | 0.237896  | 0.0320 |
| 10931457 | Uhrf1      | 0.011225  | 0.9999 | -0.687515 | 0.1240 | -0.748030 | 0.1701 | -0.870638 | 0.0317 |
| 10931663 | ---        | 0.012692  | 0.9999 | -0.062900 | 0.9388 | 0.132144  | 0.8738 | 0.518147  | 0.0064 |
| 10932126 | Rpl9       | -0.085020 | 0.9999 | 0.015660  | 0.9828 | -0.038770 | 0.9671 | -0.294780 | 0.0282 |
| 10932351 | Srpx       | -0.084866 | 0.9999 | -1.015937 | 0.0047 | -0.666025 | 0.1942 | -0.656248 | 0.0871 |
| 10932422 | Rbm3       | -0.081687 | 0.9999 | -0.819850 | 0.0028 | -0.643277 | 0.0571 | -1.056586 | 0.0005 |
| 10932568 | ---        | -0.248215 | 0.9999 | 0.696748  | 0.0006 | 0.060671  | 0.9671 | -0.216828 | 0.4039 |
| 10932917 | Pfkfb1     | -0.079553 | 0.9999 | -0.155873 | 0.4344 | -0.076487 | 0.9275 | -0.292080 | 0.0308 |
| 10933699 | Prdx4      | -0.006623 | 0.9999 | -0.177870 | 0.6480 | -0.126178 | 0.9088 | -0.410008 | 0.0426 |
| 10933957 | Rpl32      | -0.072793 | 0.9999 | 0.044070  | 0.9519 | -0.048357 | 0.9640 | -0.362300 | 0.0228 |
| 10934186 | Eda        | 0.353665  | 0.9999 | -1.006156 | 0.0016 | -0.450688 | 0.4754 | -0.089806 | 0.8998 |
| 10934394 | Itgb1bp2   | -0.767356 | 0.9999 | 0.086912  | 0.9688 | -0.446702 | 0.6890 | -0.894511 | 0.0339 |
| 10934445 | Ogt        | 0.110157  | 0.9999 | 0.293948  | 0.5616 | 0.563421  | 0.1487 | 0.753029  | 0.0118 |
| 10934631 | Lpar4      | -0.035073 | 0.9999 | -1.569561 | 0.0000 | -1.532666 | 0.0000 | -1.085373 | 0.0029 |
| 10934637 | RGD1560455 | 0.082391  | 0.9999 | -0.994512 | 0.0070 | -0.899510 | 0.0414 | -0.733360 | 0.0564 |
| 10934940 | Rpl36a     | -0.055313 | 0.9999 | 0.018620  | 0.9875 | -0.184880 | 0.8553 | -0.689610 | 0.0053 |
| 10935555 | Fhl1       | -0.502267 | 0.9999 | 1.069273  | 0.0060 | 0.638143  | 0.3086 | 0.310070  | 0.5965 |
| 10936263 | Zbtb33     | 0.097630  | 0.9999 | 0.078262  | 0.9446 | 0.225100  | 0.7957 | 0.513247  | 0.0435 |
| 10936365 | Il13ra1    | 0.103410  | 0.9999 | -0.707953 | 0.0462 | -0.477966 | 0.4578 | -0.084898 | 0.9089 |
| 10936480 | LOC499782  | -0.037077 | 0.9999 | -0.020897 | 0.9806 | -0.081663 | 0.9432 | -0.487837 | 0.0038 |
| 10936717 | Maoa       | 0.223462  | 0.9999 | 0.996898  | 0.0013 | 0.408694  | 0.5398 | 0.558304  | 0.0953 |
| 10936981 | Timm17b    | -0.054336 | 0.9999 | -0.309261 | 0.1113 | -0.260029 | 0.3899 | -0.397251 | 0.0259 |
| 10936993 | Pim2       | -0.080200 | 0.9999 | 0.442273  | 0.0385 | 0.040757  | 0.9781 | 0.153736  | 0.6217 |
| 10937048 | Tefe3      | 0.104672  | 0.9999 | 0.088483  | 0.8857 | 0.123352  | 0.8777 | 0.365031  | 0.0372 |
| 10937060 | Praf2      | 0.080859  | 0.9999 | 0.152090  | 0.6861 | 0.200034  | 0.6683 | 0.369971  | 0.0435 |
| 10937093 | Prickle3   | 0.105423  | 0.9999 | 0.421808  | 0.0404 | 0.266640  | 0.5060 | 0.424018  | 0.0359 |
| 10937174 | Fus        | 0.001529  | 0.9999 | -0.493231 | 0.0746 | -0.499211 | 0.1505 | -0.559926 | 0.0335 |
| 10937292 | Il13ra2    | -0.011572 | 0.9999 | -0.384874 | 0.0170 | -0.309533 | 0.1519 | -0.390010 | 0.0184 |
| 10937501 | Rpgr       | 0.132404  | 0.9999 | 0.021863  | 0.9786 | 0.115314  | 0.8631 | 0.371169  | 0.0180 |
| 10937521 | ---        | 0.141398  | 0.9999 | -0.233495 | 0.3792 | -0.369129 | 0.1341 | -0.396432 | 0.0368 |

|          |         |           |        |           |        |           |        |           |        |
|----------|---------|-----------|--------|-----------|--------|-----------|--------|-----------|--------|
| 10937594 | Pik3ca  | -0.034938 | 0.9999 | 0.544164  | 0.0069 | 0.562761  | 0.0157 | 0.561741  | 0.0082 |
| 10937641 | ---     | 0.089525  | 0.9999 | -0.717773 | 0.0135 | -0.599647 | 0.1046 | -0.525534 | 0.0832 |
| 10937777 | Ctps2   | 0.113644  | 0.9999 | -0.446123 | 0.0282 | -0.257399 | 0.5374 | -0.057346 | 0.8939 |
| 10937962 | Sh3kbp1 | 0.143145  | 0.9999 | -0.765942 | 0.0048 | -0.699049 | 0.0284 | -0.144963 | 0.7649 |
| 10938101 | Prkx    | -0.035273 | 0.9999 | 0.469230  | 0.1570 | 0.418538  | 0.4061 | 0.667462  | 0.0217 |
| 10938635 | Slc7a3  | -0.526461 | 0.9999 | 2.601597  | 0.0006 | 1.444874  | 0.1741 | 0.535910  | 0.6549 |
| 10938897 | Atrx    | 0.100929  | 0.9999 | 0.034993  | 0.9788 | 0.262959  | 0.7056 | 0.503406  | 0.0500 |
| 10938962 | Rps21   | -0.058977 | 0.9999 | -0.006993 | 0.9963 | -0.139153 | 0.9526 | -0.723121 | 0.0321 |
| 10938995 | Itm2a   | -0.024474 | 0.9999 | -1.064189 | 0.0006 | -0.806881 | 0.0233 | -0.554096 | 0.0897 |
| 10939516 | Tsc22d3 | 0.027904  | 0.9999 | 0.002874  | 0.9977 | 0.328614  | 0.4298 | 0.556109  | 0.0187 |
| 10939744 | Gpc4    | 0.166862  | 0.9999 | -0.999995 | 0.0047 | -0.568592 | 0.3286 | -0.523323 | 0.1901 |
| 10939805 | Fam122b | 0.370916  | 0.9999 | 0.002715  | 0.9991 | 0.294419  | 0.8095 | 0.727093  | 0.0343 |
| 10939837 | Mmgt1   | 0.029172  | 0.9999 | 0.184579  | 0.7405 | 0.249385  | 0.7112 | 0.486384  | 0.0464 |
| 10939866 | Arhgef6 | -0.110860 | 0.9999 | 0.540890  | 0.0224 | 0.580848  | 0.0324 | 0.349087  | 0.1794 |
| 10939890 | Rbmx    | -0.020979 | 0.9999 | -0.506102 | 0.0310 | -0.381267 | 0.2769 | -0.370938 | 0.1345 |
| 10939929 | ---     | 0.026539  | 0.9999 | -1.173706 | 0.0196 | -0.494139 | 0.7478 | -0.137134 | 0.8997 |
| 10940364 | Gdi1    | 0.041098  | 0.9999 | 0.059839  | 0.9494 | 0.183790  | 0.7897 | 0.484614  | 0.0195 |
| 10940453 | ---     | 0.141248  | 0.9999 | -0.593144 | 0.0291 | -0.224774 | 0.8250 | -0.251951 | 0.4758 |
| 10940455 | ---     | -0.221359 | 0.9999 | 1.008007  | 0.1485 | 1.617565  | 0.0197 | 1.185190  | 0.0573 |
| 10940465 | ---     | -0.279257 | 0.9999 | -0.424408 | 0.0475 | -0.227924 | 0.6732 | -0.271205 | 0.2491 |
| 10940481 | ---     | -0.082433 | 0.9999 | -0.045117 | 0.9558 | -0.072133 | 0.9517 | -0.398920 | 0.0208 |
| 10940524 | ---     | 0.063608  | 0.9999 | -0.047063 | 0.9575 | 0.346809  | 0.1646 | 0.436404  | 0.0197 |
| 10940527 | ---     | -0.227128 | 0.9999 | 0.597753  | 0.0269 | 0.455350  | 0.2497 | 0.330639  | 0.2877 |
| 10940529 | ---     | -0.027369 | 0.9999 | -0.530957 | 0.0061 | -0.401617 | 0.1159 | -0.442652 | 0.0282 |
| 10940536 | ---     | -0.018016 | 0.9999 | 0.408527  | 0.0035 | 0.273720  | 0.1617 | 0.239046  | 0.1198 |
| 10940552 | ---     | 0.111105  | 0.9999 | 0.086541  | 0.8054 | 0.238223  | 0.1902 | 0.275486  | 0.0375 |
| 10940558 | ---     | 0.051446  | 0.9999 | -0.390678 | 0.0183 | -0.197359 | 0.6085 | -0.328201 | 0.0514 |
| 10940562 | ---     | 0.019997  | 0.9999 | -0.490342 | 0.0238 | -0.435046 | 0.1175 | -0.371262 | 0.1026 |
| 10940575 | ---     | 0.182798  | 0.9999 | 0.131658  | 0.8412 | 0.333267  | 0.3759 | 0.583013  | 0.0104 |
| 10940578 | ---     | 0.100615  | 0.9999 | 0.198574  | 0.4334 | 0.375396  | 0.0705 | 0.555353  | 0.0017 |
| 10940585 | ---     | -0.008281 | 0.9999 | -0.615481 | 0.0476 | -0.439493 | 0.3995 | -0.306578 | 0.4212 |
| 10940592 | ---     | 0.011133  | 0.9999 | 0.592367  | 0.0053 | 0.248304  | 0.6518 | 0.275887  | 0.2721 |
| 10940599 | ---     | 0.010463  | 0.9999 | 0.324187  | 0.3160 | 0.203400  | 0.8237 | 0.515603  | 0.0347 |
| 10940611 | ---     | -0.059481 | 0.9999 | -0.418645 | 0.0027 | -0.375238 | 0.0217 | -0.407809 | 0.0064 |
| 10940629 | ---     | 0.279263  | 0.9999 | 0.077433  | 0.9484 | 0.551567  | 0.0858 | 0.595873  | 0.0230 |
| 10940636 | ---     | 0.210736  | 0.9999 | -0.026589 | 0.9701 | 0.131417  | 0.7485 | 0.295223  | 0.0303 |
| 10940642 | ---     | 0.224603  | 0.9999 | -0.769984 | 0.0078 | -0.375190 | 0.5413 | -0.170613 | 0.7262 |
| 10940659 | ---     | -0.065215 | 0.9999 | -0.851176 | 0.0150 | -1.043105 | 0.0070 | -0.959575 | 0.0081 |
| 10940671 | ---     | 0.045786  | 0.9999 | -0.415211 | 0.0814 | -0.372403 | 0.2610 | -0.507470 | 0.0238 |
| 10940676 | ---     | 0.122178  | 0.9999 | -0.398200 | 0.0048 | -0.240275 | 0.2723 | -0.092743 | 0.6876 |
| 10940687 | ---     | -0.025955 | 0.9999 | -0.048240 | 0.9403 | -0.157560 | 0.6735 | -0.302780 | 0.0361 |
| 10940688 | ---     | -0.198527 | 0.9999 | -0.632478 | 0.0233 | -0.713764 | 0.0239 | -0.531159 | 0.0618 |
