# Supplementary material
Source: PubMed Central journal article supplement (PMC3683774)
Supplement: 1304913110_sd03.pdf [file 1304913110_sd03.pdf]

| Affymetrix Probe ID | Gene Symbol | 96 Hours  |         |            |         |             |         |             |         |
|---------------------|-------------|-----------|---------|------------|---------|-------------|---------|-------------|---------|
|                     |             | <u>P-</u> |         | <u>I+S</u> |         | <u>P+LS</u> |         | <u>P+TS</u> |         |
|                     |             | Log FC    | p-Value | Log FC     | p-Value | Log FC      | p-Value | Log FC      | p-Value |
| 10700040            | ---         | -0.115071 | 0.9999  | -0.099324  | 0.8818  | -0.161588   | 0.6450  | -0.534675   | 0.0317  |
| 10700079            | ---         | 0.280216  | 0.8614  | 0.548015   | 0.0155  | 0.560812    | 0.0059  | 0.492260    | 0.0156  |
| 10700101            | ---         | 0.440088  | 0.8359  | 0.785020   | 0.0130  | 0.951121    | 0.0008  | 0.956996    | 0.0006  |
| 10700102            | ---         | 0.124160  | 0.9999  | 0.204409   | 0.7187  | 0.554711    | 0.0448  | 0.225240    | 0.5416  |
| 10700108            | ---         | -0.100217 | 0.9999  | -0.021357  | 0.9801  | -0.064960   | 0.8637  | -0.494470   | 0.0214  |
| 10700111            | ---         | 0.664312  | 0.7200  | 0.846268   | 0.0249  | 0.899890    | 0.0070  | 0.592195    | 0.0971  |
| 10700124            | ---         | 0.620544  | 0.7375  | 0.816332   | 0.0394  | 1.038452    | 0.0024  | 0.990419    | 0.0031  |
| 10700158            | ---         | 0.230296  | 0.8614  | 0.286713   | 0.1825  | 0.340236    | 0.0423  | 0.229831    | 0.2229  |
| 10700163            | ---         | -0.041232 | 0.9999  | 0.223859   | 0.3162  | 0.329532    | 0.0362  | 0.177449    | 0.3493  |
| 10700172            | ---         | 0.363739  | 0.9010  | 0.304866   | 0.5816  | 0.623260    | 0.0470  | 0.324851    | 0.3982  |
| 10700258            | ---         | 0.014273  | 0.9999  | 0.158917   | 0.5107  | 0.250163    | 0.0976  | 0.296780    | 0.0432  |
| 10700279            | ---         | 0.105823  | 0.9795  | 0.181447   | 0.3858  | 0.295610    | 0.0343  | 0.240993    | 0.1006  |
| 10700326            | ---         | 0.128474  | 0.9999  | 0.149541   | 0.8332  | 0.743197    | 0.0094  | 0.300925    | 0.4041  |
| 10700366            | ---         | 0.481415  | 0.8169  | 0.478282   | 0.2621  | 0.703838    | 0.0229  | 0.612019    | 0.0528  |
| 10700373            | ---         | 0.421804  | 0.9546  | 0.521866   | 0.4475  | 0.822137    | 0.0645  | 1.019745    | 0.0176  |
| 10700398            | ---         | 0.408402  | 0.9277  | 0.457309   | 0.4412  | 0.767797    | 0.0448  | 0.736083    | 0.0574  |
| 10700408            | ---         | -0.315355 | 0.8437  | -0.126816  | 0.7991  | -0.530068   | 0.0117  | -0.093860   | 0.7878  |
| 10700426            | ---         | 0.027822  | 0.9999  | 0.107332   | 0.8822  | -0.142580   | 0.7246  | 0.632420    | 0.0179  |
| 10700434            | ---         | 0.059843  | 0.9999  | 0.149377   | 0.6552  | 0.354112    | 0.0433  | 0.210251    | 0.3055  |
| 10700485            | ---         | -0.360218 | 0.9247  | -0.453239  | 0.3460  | -0.679960   | 0.0406  | -0.036823   | 0.9588  |
| 10700517            | ---         | -0.031367 | 0.9999  | -0.058571  | 0.9145  | 0.117503    | 0.6729  | 0.457542    | 0.0163  |
| 10700526            | ---         | 0.452841  | 0.8570  | 0.030840   | 0.9803  | 0.654302    | 0.0426  | 0.566073    | 0.0918  |
| 10700528            | ---         | 0.218211  | 0.9624  | 0.204054   | 0.6719  | 0.566291    | 0.0205  | 0.583586    | 0.0156  |
| 10700552            | ---         | 0.455853  | 0.9867  | 0.804512   | 0.4158  | 1.304317    | 0.0444  | 1.136543    | 0.0918  |
| 10700634            | ---         | -0.351730 | 0.9507  | -0.216806  | 0.7865  | -0.758294   | 0.0306  | -0.401190   | 0.3425  |
| 10700654            | ---         | 0.262361  | 0.9978  | 0.379114   | 0.7159  | 1.024436    | 0.0435  | 0.646234    | 0.2691  |
| 10700702            | ---         | -0.250280 | 0.9624  | -0.340377  | 0.4717  | -0.399359   | 0.2205  | -0.610781   | 0.0382  |
| 10700714            | ---         | 0.444211  | 0.8857  | 0.689747   | 0.1079  | 0.826635    | 0.0181  | 1.068858    | 0.0016  |
| 10700721            | ---         | -0.302899 | 0.8570  | -0.374766  | 0.1709  | -0.180367   | 0.5165  | -0.474429   | 0.0252  |
| 10700732            | ---         | 0.222250  | 0.9659  | -0.231386  | 0.6730  | -0.572898   | 0.0418  | -0.450533   | 0.1344  |
| 10700747            | ---         | -0.234104 | 0.9765  | -0.171860  | 0.8126  | -0.131585   | 0.7880  | -0.652171   | 0.0321  |
| 10700805            | ---         | 0.263579  | 0.8962  | 0.339825   | 0.2508  | 0.590336    | 0.0058  | 0.314934    | 0.1929  |
| 10700838            | ---         | 0.175353  | 0.9632  | 0.000804   | 0.9990  | 0.451989    | 0.0331  | 0.006731    | 0.9901  |
| 10700839            | ---         | 0.850193  | 0.4739  | 0.671483   | 0.1471  | 0.867116    | 0.0176  | 0.827224    | 0.0232  |
| 10700843            | ---         | 0.281274  | 0.9620  | 0.517887   | 0.2041  | 0.421624    | 0.2216  | 0.767428    | 0.0113  |
| 10700857            | ---         | 0.414215  | 0.8701  | 0.599924   | 0.1332  | 0.631421    | 0.0526  | 0.779886    | 0.0130  |
| 10700859            | ---         | -0.063907 | 0.9999  | -0.309038  | 0.1587  | -0.446746   | 0.0087  | -0.308822   | 0.0870  |
| 10700865            | ---         | 0.095049  | 0.9999  | 0.405870   | 0.5564  | 0.808196    | 0.0426  | 1.078238    | 0.0047  |
| 10700890            | ---         | -0.028716 | 0.9999  | -0.617245  | 0.0376  | -0.465633   | 0.0845  | -0.757707   | 0.0025  |
| 10700906            | ---         | 0.013852  | 0.9999  | 0.744283   | 0.0138  | 0.424304    | 0.1514  | 0.314448    | 0.3464  |
| 10700937            | ---         | 0.239697  | 0.9544  | 0.231777   | 0.6035  | 0.483317    | 0.0524  | 0.674343    | 0.0044  |
| 10701017            | ---         | -0.009206 | 0.9999  | 0.357768   | 0.1708  | 0.560734    | 0.0051  | 0.578196    | 0.0031  |
| 10701029            | ---         | 0.126877  | 0.9999  | 0.789234   | 0.1185  | 0.956025    | 0.0195  | 0.594341    | 0.1957  |
| 10701048            | ---         | -0.264801 | 0.8669  | -0.411249  | 0.0958  | -0.495771   | 0.0142  | -0.418440   | 0.0429  |

|          |           |           |        |           |        |           |        |           |        |
|----------|-----------|-----------|--------|-----------|--------|-----------|--------|-----------|--------|
| 10701078 | ---       | -0.059228 | 0.9999 | -0.177290 | 0.6191 | -0.228916 | 0.3060 | -0.477277 | 0.0110 |
| 10701106 | ---       | 0.292246  | 0.9582 | 0.518997  | 0.1958 | 0.414342  | 0.2257 | 0.668631  | 0.0288 |
| 10701144 | ---       | 0.218838  | 0.9525 | 0.208433  | 0.6033 | 0.295356  | 0.2310 | 0.445568  | 0.0462 |
| 10701150 | ---       | 0.317928  | 0.8987 | 0.368485  | 0.3352 | 0.548958  | 0.0394 | 0.228277  | 0.5145 |
| 10701179 | ---       | 0.438421  | 0.7796 | 0.399355  | 0.2623 | 0.496442  | 0.0596 | 0.526113  | 0.0447 |
| 10701180 | ---       | 0.321204  | 0.8669 | 0.272745  | 0.5045 | -0.060779 | 0.8915 | 0.510817  | 0.0385 |
| 10701216 | ---       | 0.006073  | 0.9999 | 0.421714  | 0.3176 | 0.658844  | 0.0258 | 0.380674  | 0.2677 |
| 10701226 | ---       | 0.211401  | 0.9625 | 0.220145  | 0.6430 | 0.087667  | 0.8327 | 0.539674  | 0.0295 |
| 10701227 | ---       | 0.809573  | 0.4739 | 0.778897  | 0.0562 | 0.865866  | 0.0126 | 0.980962  | 0.0038 |
| 10701245 | ---       | 0.072550  | 0.9999 | 0.357066  | 0.3558 | 0.574559  | 0.0294 | 0.351614  | 0.2445 |
| 10701254 | ---       | -0.102721 | 0.9972 | 0.100657  | 0.8285 | 0.058699  | 0.8586 | 0.468330  | 0.0123 |
| 10701304 | ---       | 0.078287  | 0.9999 | 0.276378  | 0.4967 | 0.314963  | 0.2609 | 0.509878  | 0.0399 |
| 10701312 | ---       | 0.065747  | 0.9999 | 0.182477  | 0.4403 | 0.253040  | 0.1089 | 0.327323  | 0.0298 |
| 10701315 | ---       | 0.228567  | 0.8973 | 0.239210  | 0.4065 | 0.397711  | 0.0356 | 0.332490  | 0.0930 |
| 10701316 | ---       | 0.224372  | 0.9968 | 0.394712  | 0.5883 | 0.621848  | 0.1543 | 0.934422  | 0.0201 |
| 10701320 | ---       | 0.437717  | 0.9106 | 0.405968  | 0.5302 | 0.569703  | 0.1654 | 0.989650  | 0.0075 |
| 10701328 | ---       | 0.200277  | 0.9310 | 0.227353  | 0.4496 | 0.400340  | 0.0366 | 0.429593  | 0.0229 |
| 10701346 | ---       | 0.386134  | 0.9632 | 0.288973  | 0.7865 | 0.955062  | 0.0424 | 0.607103  | 0.2610 |
| 10701404 | ---       | 0.274077  | 0.8795 | 0.332840  | 0.2614 | 0.492930  | 0.0218 | 0.344323  | 0.1394 |
| 10701405 | ---       | -0.425889 | 0.8614 | -0.292488 | 0.6021 | -0.616464 | 0.0487 | -0.375948 | 0.3021 |
| 10701487 | ---       | 0.412094  | 0.8614 | 0.527985  | 0.1689 | 0.535912  | 0.0837 | 0.704025  | 0.0171 |
| 10701557 | ---       | -0.031373 | 0.9999 | -0.244012 | 0.3329 | -0.286782 | 0.1176 | -0.374450 | 0.0317 |
| 10701568 | ---       | 0.108959  | 0.9921 | 0.287527  | 0.2434 | 0.297233  | 0.1205 | 0.418529  | 0.0199 |
| 10701592 | ---       | 0.437457  | 0.9333 | 0.563256  | 0.3640 | 0.901743  | 0.0323 | 0.728528  | 0.1002 |
| 10701699 | Lrp11     | 0.175403  | 0.8945 | 0.192478  | 0.3614 | 0.262910  | 0.0732 | 0.473471  | 0.0006 |
| 10701709 | Lats1     | 0.161701  | 0.9805 | 0.202317  | 0.6022 | 0.429279  | 0.0473 | 0.209952  | 0.4402 |
| 10701788 | Fbxo30    | 0.023120  | 0.9999 | 0.278917  | 0.3616 | 0.553092  | 0.0067 | 0.467182  | 0.0228 |
| 10701846 | Cited2    | -0.306089 | 0.9090 | 0.746567  | 0.0094 | 0.941467  | 0.0003 | 1.038284  | 0.0001 |
| 10701913 | Perp      | 0.239222  | 0.9624 | -1.115890 | 0.0001 | -0.407134 | 0.1597 | -0.610820 | 0.0219 |
| 10701924 | Ifngr1    | -0.025401 | 0.9999 | -0.301989 | 0.0720 | -0.213256 | 0.1641 | -0.300754 | 0.0346 |
| 10702025 | Ahi1      | -0.004685 | 0.9999 | 0.471203  | 0.1827 | 0.742718  | 0.0058 | 0.337479  | 0.2943 |
| 10702165 | L3mbtl3   | -0.118656 | 0.9999 | 0.776969  | 0.0167 | 0.903972  | 0.0020 | 0.926867  | 0.0011 |
| 10702201 | Akap7     | 0.061209  | 0.9999 | -0.269096 | 0.2824 | -0.456017 | 0.0103 | -0.332667 | 0.0742 |
| 10702224 | Enpp3     | 0.174303  | 0.9999 | -1.014394 | 0.0327 | -1.345967 | 0.0012 | -1.667423 | 0.0001 |
| 10702295 | Eya4      | 0.116313  | 0.9999 | 0.717543  | 0.1185 | 0.777181  | 0.0389 | 0.613961  | 0.1256 |
| 10702306 | Tcf21     | 0.700262  | 0.7409 | -1.491598 | 0.0004 | -1.573934 | 0.0001 | -1.965506 | 0.0000 |
| 10702342 | Rnf217    | 0.011347  | 0.9999 | 0.324031  | 0.0866 | 0.444189  | 0.0044 | 0.205755  | 0.2612 |
| 10702352 | Tpd521l   | -0.084020 | 0.9999 | 0.434098  | 0.2750 | 0.924578  | 0.0011 | 0.889751  | 0.0013 |
| 10702408 | LOC689399 | -0.005656 | 0.9999 | -0.674958 | 0.1005 | -1.012784 | 0.0025 | -1.187338 | 0.0003 |
| 10702492 | Ahrr      | 0.107498  | 0.9990 | -0.025456 | 0.9759 | -0.343002 | 0.1370 | -0.478484 | 0.0269 |
| 10702519 | Trip13    | 0.237920  | 0.9912 | -0.552500 | 0.2413 | -0.592137 | 0.1034 | -0.895084 | 0.0084 |
| 10702913 | Fndc1     | 0.495051  | 0.9620 | 1.442232  | 0.0169 | 0.666946  | 0.2947 | 0.567751  | 0.4087 |
| 10702996 | Igf2r     | 0.118857  | 0.9942 | 0.221863  | 0.5249 | 0.449293  | 0.0300 | 0.507490  | 0.0121 |
| 10703075 | Map3k4    | 0.225627  | 0.8770 | 0.381111  | 0.0654 | 0.606693  | 0.0005 | 0.383793  | 0.0295 |
| 10703144 | Rps6ka2   | 0.122243  | 0.9961 | -0.405129 | 0.1438 | -0.349491 | 0.1356 | -0.587910 | 0.0059 |
| 10703189 | Mllt4     | 0.196815  | 0.9624 | 0.625431  | 0.0114 | 0.775958  | 0.0005 | 0.843726  | 0.0002 |
| 10703224 | ---       | -0.329793 | 0.9624 | -0.657830 | 0.1861 | -1.112135 | 0.0033 | -0.848769 | 0.0260 |

|          |           |           |        |           |        |           |        |           |        |
|----------|-----------|-----------|--------|-----------|--------|-----------|--------|-----------|--------|
| 10703240 | Vom2r8    | -0.260466 | 0.7200 | -0.317000 | 0.0230 | -0.246975 | 0.0530 | -0.260193 | 0.0398 |
| 10703375 | Rpl35a    | -0.020795 | 0.9999 | -0.107948 | 0.8125 | -0.493406 | 0.0089 | -0.341034 | 0.0883 |
| 10703432 | LOC688452 | 0.556899  | 0.9136 | 0.527868  | 0.5237 | 1.257105  | 0.0096 | 0.909483  | 0.0739 |
| 10703434 | LOC688452 | 0.307007  | 0.9695 | 0.437722  | 0.4961 | 0.902756  | 0.0201 | 0.759744  | 0.0565 |
| 10703461 | ---       | -0.176209 | 0.8973 | -0.335789 | 0.0448 | -0.170419 | 0.3163 | -0.171078 | 0.3267 |
| 10703564 | Rpl18a    | 0.038340  | 0.9999 | -0.084510 | 0.7815 | -0.258030 | 0.0572 | -0.293620 | 0.0271 |
| 10703626 | Vom2r22   | -0.147141 | 0.9171 | -0.186726 | 0.3150 | -0.294814 | 0.0236 | -0.141896 | 0.3740 |
| 10703648 | Eif5b     | 0.110943  | 0.9972 | 0.296717  | 0.3144 | 0.448300  | 0.0307 | 0.381774  | 0.0752 |
| 10703710 | LOC683446 | 0.078721  | 0.9921 | -0.248903 | 0.0856 | -0.231540 | 0.0612 | -0.309794 | 0.0087 |
| 10703895 | ---       | -0.221215 | 0.2493 | -0.155547 | 0.1236 | -0.180787 | 0.0272 | -0.084585 | 0.4068 |
| 10704045 | ---       | -0.063630 | 0.9999 | -0.445116 | 0.0872 | -0.594491 | 0.0055 | -0.586555 | 0.0054 |
| 10704062 | Tnni3     | -0.078830 | 0.9999 | -0.523987 | 0.0767 | -0.494687 | 0.0513 | -0.733040 | 0.0023 |
| 10704084 | Ppp1r12c  | -0.009604 | 0.9999 | 0.216915  | 0.2093 | 0.248668  | 0.0628 | 0.297224  | 0.0220 |
| 10704127 | Cdc42ep5  | 0.153986  | 0.9630 | -0.188872 | 0.5535 | -0.349357 | 0.0614 | -0.471848 | 0.0081 |
| 10704383 | Znf541    | -0.084800 | 0.9695 | -0.123154 | 0.4828 | -0.241557 | 0.0244 | -0.087443 | 0.5484 |
| 10704499 | Ap2s1     | -0.011019 | 0.9999 | -0.186742 | 0.4480 | -0.414379 | 0.0070 | -0.292248 | 0.0698 |
| 10704505 | Slc1a5    | -0.050660 | 0.9999 | -0.670767 | 0.0610 | -0.940022 | 0.0019 | -1.187399 | 0.0001 |
| 10704555 | Dact3     | 0.164344  | 0.9624 | 0.495699  | 0.0196 | 0.438298  | 0.0227 | 0.501305  | 0.0074 |
| 10704578 | Ccdc8     | 0.176634  | 0.9624 | -0.298620 | 0.2859 | -0.309159 | 0.1509 | -0.455467 | 0.0220 |
| 10704794 | Rtn2      | 0.090908  | 0.9921 | 0.423430  | 0.0033 | 0.228589  | 0.1060 | 0.248170  | 0.0778 |
| 10704808 | Ercc1     | -0.069231 | 0.9999 | 0.365476  | 0.2315 | 0.501247  | 0.0279 | 0.351819  | 0.1564 |
| 10704819 | LOC686781 | -0.133397 | 0.9921 | 0.438484  | 0.0926 | 0.426579  | 0.0525 | 0.546621  | 0.0097 |
| 10704831 | Ckm       | 0.138345  | 0.9961 | -0.132362 | 0.8269 | -0.701523 | 0.0043 | -0.693655 | 0.0039 |
| 10704912 | LOC680714 | 0.135954  | 0.9805 | 0.175264  | 0.5861 | 0.412594  | 0.0214 | 0.247613  | 0.2255 |
| 10704914 | ---       | 0.153944  | 0.9765 | 0.210064  | 0.5410 | 0.417448  | 0.0382 | 0.174456  | 0.5083 |
| 10704960 | Cadm4     | -0.025211 | 0.9999 | 0.030058  | 0.9831 | -0.470958 | 0.2398 | -0.813766 | 0.0213 |
| 10704996 | Ethe1     | -0.019999 | 0.9999 | 0.213187  | 0.5441 | 0.413895  | 0.0448 | 0.351121  | 0.1037 |
| 10705004 | Phldb3    | 0.024770  | 0.9999 | 0.392349  | 0.1812 | 0.289361  | 0.2624 | 0.463518  | 0.0433 |
| 10705100 | Znf574    | 0.220097  | 0.8832 | 0.358942  | 0.0831 | 0.437846  | 0.0109 | 0.456940  | 0.0067 |
| 10705192 | Atp5sl    | 0.066234  | 0.9999 | -0.185007 | 0.5199 | -0.441941 | 0.0089 | -0.365878 | 0.0326 |
| 10705361 | Sertad3   | 0.120200  | 0.9985 | 0.194278  | 0.6704 | 0.509557  | 0.0290 | 0.309713  | 0.2481 |
| 10705367 | Prx       | -0.134092 | 0.9136 | -0.177846 | 0.2798 | -0.197284 | 0.1108 | -0.252460 | 0.0328 |
| 10705420 | Rpl28     | 0.013910  | 0.9999 | -0.087990 | 0.6993 | -0.175840 | 0.1423 | -0.244470 | 0.0295 |
| 10705539 | Gmfg      | 0.102539  | 0.9921 | -0.476312 | 0.0099 | -0.590736 | 0.0005 | -0.387018 | 0.0216 |
| 10705874 | Tyrobp    | 0.468399  | 0.9038 | -1.387201 | 0.0010 | -1.633874 | 0.0001 | -1.573380 | 0.0001 |
| 10706013 | U2af114   | -0.009001 | 0.9999 | -0.077151 | 0.7907 | -0.262103 | 0.0392 | -0.233625 | 0.0740 |
| 10706117 | Pepd      | 0.253967  | 0.9247 | -0.405613 | 0.1746 | -0.570807 | 0.0127 | -0.819897 | 0.0003 |
| 10706162 | Ccdc123   | 0.000353  | 0.9999 | -0.425904 | 0.0148 | -0.393243 | 0.0127 | -0.464175 | 0.0025 |
| 10706289 | ---       | -0.169411 | 0.9624 | -0.277947 | 0.3108 | -0.420872 | 0.0295 | -0.285462 | 0.1816 |
| 10706545 | Syt3      | -0.088877 | 0.9630 | 0.062984  | 0.7984 | 0.195994  | 0.0695 | 0.278329  | 0.0065 |
| 10706668 | Fuz       | 0.216744  | 0.8570 | 0.125619  | 0.6749 | 0.329248  | 0.0312 | 0.171157  | 0.3548 |
| 10706994 | Tmem143   | 0.034872  | 0.9999 | -0.143770 | 0.7318 | -0.242237 | 0.2903 | -0.416497 | 0.0365 |
| 10707121 | Gtf2h1    | 0.071796  | 0.9999 | 0.155544  | 0.6432 | 0.373767  | 0.0341 | 0.195726  | 0.3591 |
| 10707338 | Gas2      | -0.193473 | 0.8570 | -0.212582 | 0.2572 | -0.139448 | 0.4052 | -0.358344 | 0.0069 |
| 10707455 | Herc2     | 0.270019  | 0.8348 | 0.354758  | 0.0958 | 0.490072  | 0.0048 | 0.453057  | 0.0084 |
| 10707626 | Ube3a     | 0.075301  | 0.9999 | 0.191196  | 0.4828 | 0.390273  | 0.0186 | 0.386338  | 0.0189 |
| 10707649 | Ndn       | 0.001613  | 0.9999 | -0.373627 | 0.2413 | -0.527824 | 0.0251 | -0.542890 | 0.0198 |

|          |            |           |        |           |        |           |        |           |        |
|----------|------------|-----------|--------|-----------|--------|-----------|--------|-----------|--------|
| 10707945 | St8sia2    | -0.354082 | 0.9507 | 0.878454  | 0.0273 | 0.561332  | 0.1367 | 0.165890  | 0.7726 |
| 10707953 | Akap13     | 0.052320  | 0.9999 | 0.397589  | 0.2367 | 0.635931  | 0.0099 | 0.369060  | 0.1815 |
| 10707961 | Akap13     | -0.038898 | 0.9999 | 0.476128  | 0.0633 | 0.719190  | 0.0009 | 0.764233  | 0.0004 |
| 10708011 | Aen        | -0.089773 | 0.9999 | 0.304091  | 0.4407 | 0.785143  | 0.0016 | 0.567586  | 0.0229 |
| 10708015 | Isg20      | -0.010970 | 0.9999 | 0.240677  | 0.6327 | 0.842740  | 0.0014 | 0.592876  | 0.0256 |
| 10708065 | LOC683179  | -0.001750 | 0.9999 | -0.508333 | 0.3423 | -0.778058 | 0.0352 | -0.961895 | 0.0071 |
| 10708188 | Vps33b     | 0.051257  | 0.9999 | 0.153215  | 0.6909 | 0.384760  | 0.0482 | 0.230310  | 0.3134 |
| 10708214 | Prc1       | -0.035834 | 0.9999 | -0.881348 | 0.1668 | -1.059522 | 0.0341 | -1.553464 | 0.0012 |
| 10708235 | Zfp29      | 0.198986  | 0.9247 | 0.148809  | 0.6794 | 0.391528  | 0.0321 | 0.367013  | 0.0469 |
| 10708237 | Znf592     | 0.119826  | 0.9977 | 0.164845  | 0.7313 | 0.420749  | 0.0701 | 0.456867  | 0.0469 |
| 10708247 | Alpk3      | -0.099819 | 0.9985 | 0.441085  | 0.0492 | 0.608516  | 0.0015 | 0.603241  | 0.0013 |
| 10708531 | Rab38      | 0.019283  | 0.9999 | -0.144259 | 0.3815 | -0.222303 | 0.0453 | -0.298839 | 0.0049 |
| 10708665 | Rab30      | 0.212489  | 0.9921 | 0.487911  | 0.2674 | 0.705154  | 0.0271 | 0.473755  | 0.1795 |
| 10708760 | Alg8       | 0.218233  | 0.9310 | -0.343484 | 0.2107 | -0.502651 | 0.0146 | -0.393787 | 0.0656 |
| 10708809 | Rsf1       | 0.243493  | 0.9451 | 0.445147  | 0.1369 | 0.585798  | 0.0132 | 0.423967  | 0.0918 |
| 10708903 | Prkrir     | -0.111855 | 0.9972 | -0.334411 | 0.2315 | -0.373105 | 0.0834 | -0.676585 | 0.0008 |
| 10708908 | Wnt11      | -0.107990 | 0.9921 | 0.370485  | 0.0575 | 0.239031  | 0.1945 | 0.364297  | 0.0297 |
| 10708954 | Arrb1      | 0.223588  | 0.9582 | 0.106520  | 0.8587 | 0.515584  | 0.0280 | 0.288015  | 0.2959 |
| 10709016 | Kcne3      | -0.215598 | 0.8562 | -0.320793 | 0.0696 | -0.292076 | 0.0556 | -0.342916 | 0.0210 |
| 10709020 | Pgm2l1     | -0.025958 | 0.9999 | 0.520418  | 0.1178 | 0.886210  | 0.0009 | 0.749533  | 0.0041 |
| 10709093 | Ucp2       | 0.041430  | 0.9999 | 0.308020  | 0.3331 | 0.322910  | 0.1769 | 0.591747  | 0.0055 |
| 10709126 | Fam168a    | -0.095695 | 0.9977 | 0.160947  | 0.6439 | 0.219804  | 0.2980 | 0.411040  | 0.0229 |
| 10709157 | Stard10    | 0.131055  | 0.9867 | 0.332135  | 0.1559 | 0.435755  | 0.0170 | 0.405732  | 0.0267 |
| 10709166 | Arap1      | 0.270136  | 0.8437 | -0.452632 | 0.0228 | -0.593061 | 0.0008 | -0.732821 | 0.0000 |
| 10709261 | RGD1311634 | -0.001602 | 0.9999 | -0.390378 | 0.1032 | -0.526460 | 0.0068 | -0.554600 | 0.0035 |
| 10709300 | Trpc2      | -0.120845 | 0.9247 | -0.029049 | 0.9299 | -0.155459 | 0.2048 | -0.248034 | 0.0245 |
| 10709330 | Art1       | -0.414042 | 0.2425 | -0.169024 | 0.4891 | -0.366557 | 0.0127 | -0.224498 | 0.1713 |
| 10709644 | ---        | 0.155522  | 0.9632 | 0.101638  | 0.8232 | 0.200240  | 0.3733 | 0.384870  | 0.0419 |
| 10709687 | Olfml1     | 0.510392  | 0.7316 | -0.615209 | 0.0598 | -0.900550 | 0.0011 | -1.103675 | 0.0001 |
| 10709763 | Nlrp10     | -0.056400 | 0.9999 | 0.212156  | 0.4633 | 0.367492  | 0.0443 | 0.044609  | 0.8950 |
| 10709875 | Adm        | 0.234702  | 0.9968 | -0.830723 | 0.1146 | -0.911201 | 0.0346 | -1.254894 | 0.0024 |
| 10709923 | Usp47      | 0.017954  | 0.9999 | 0.337421  | 0.2102 | 0.571198  | 0.0044 | 0.292881  | 0.1995 |
| 10710028 | Arntl      | -0.092331 | 0.9999 | 0.475338  | 0.2714 | 0.750077  | 0.0153 | 0.248507  | 0.5594 |
| 10710067 | Spon1      | 0.539077  | 0.8893 | -2.142278 | 0.0000 | -2.271928 | 0.0000 | -2.226982 | 0.0000 |
| 10710089 | Pde3b      | 0.309319  | 0.9525 | -0.685440 | 0.0598 | -0.915364 | 0.0030 | -1.062839 | 0.0005 |
| 10710313 | RGD1305412 | -0.099011 | 0.9921 | -0.268232 | 0.1581 | -0.257901 | 0.0975 | -0.329224 | 0.0271 |
| 10710494 | Eef2k      | 0.174608  | 0.9653 | -0.567690 | 0.0155 | -0.603316 | 0.0042 | -0.587226 | 0.0045 |
| 10710627 | Plk1       | 0.002649  | 0.9999 | -1.130259 | 0.0448 | -1.406315 | 0.0036 | -1.851114 | 0.0001 |
| 10710647 | Prkcb      | 0.052302  | 0.9990 | -0.079272 | 0.7213 | -0.214466 | 0.0470 | -0.017094 | 0.9365 |
| 10710674 | Rbbp6      | 0.073660  | 0.9999 | 0.142092  | 0.7721 | 0.455561  | 0.0378 | 0.401023  | 0.0762 |
| 10710695 | Tnrc6a     | 0.091358  | 0.9999 | 0.382382  | 0.1172 | 0.606868  | 0.0020 | 0.566282  | 0.0030 |
| 10711087 | Srcap      | 0.252666  | 0.8660 | 0.263804  | 0.3478 | 0.456878  | 0.0167 | 0.451057  | 0.0175 |
| 10711268 | Itgam      | 0.527430  | 0.7200 | -0.552198 | 0.0872 | -0.616866 | 0.0219 | -0.780037 | 0.0026 |
| 10711299 | Itgax      | 0.178422  | 0.9310 | -0.376643 | 0.0532 | -0.404090 | 0.0155 | -0.371046 | 0.0270 |
| 10711454 | Ppapdc1a   | -0.058589 | 0.9999 | -0.452769 | 0.0230 | -0.526103 | 0.0030 | -0.454289 | 0.0094 |
| 10711504 | Tacc2      | -0.166513 | 0.9247 | 0.169003  | 0.5052 | 0.353362  | 0.0200 | 0.266162  | 0.0975 |
| 10711566 | Htra1      | -0.058723 | 0.9999 | -0.600013 | 0.0313 | -0.811363 | 0.0009 | -0.626727 | 0.0092 |

|          |            |           |        |           |        |           |        |           |        |
|----------|------------|-----------|--------|-----------|--------|-----------|--------|-----------|--------|
| 10711733 | ---        | 0.216577  | 0.9299 | 0.388285  | 0.1186 | 0.598319  | 0.0027 | 0.529844  | 0.0070 |
| 10711791 | Dock1      | 0.076630  | 0.9999 | -0.427979 | 0.1652 | -0.504981 | 0.0372 | -0.745445 | 0.0013 |
| 10711961 | Inpp5a     | -0.035516 | 0.9999 | 0.120823  | 0.7242 | 0.237996  | 0.1815 | 0.335733  | 0.0423 |
| 10712080 | Olr311     | 0.019746  | 0.9999 | -0.017069 | 0.9505 | 0.056683  | 0.6188 | 0.205678  | 0.0106 |
| 10712157 | ---        | -0.020280 | 0.9999 | -0.424651 | 0.1126 | -0.419054 | 0.0597 | -0.694728 | 0.0010 |
| 10712171 | Ifitm1     | 0.050091  | 0.9999 | -1.929334 | 0.0001 | -2.038402 | 0.0000 | -2.439068 | 0.0000 |
| 10712340 | Cd151      | -0.203963 | 0.8872 | 0.155287  | 0.5994 | 0.443660  | 0.0058 | 0.457117  | 0.0036 |
| 10712349 | Tspan4     | 0.160910  | 0.9224 | -0.424318 | 0.0069 | -0.232808 | 0.1321 | -0.251498 | 0.1030 |
| 10712359 | Ap2a2      | 0.123343  | 0.9624 | -0.272165 | 0.1173 | -0.287789 | 0.0438 | -0.451603 | 0.0009 |
| 10712501 | Mrpl23     | -0.080209 | 0.9977 | -0.220248 | 0.3107 | -0.435068 | 0.0038 | -0.524725 | 0.0004 |
| 10712517 | Cd81       | 0.027060  | 0.9999 | 0.111660  | 0.5158 | 0.183547  | 0.0841 | 0.230577  | 0.0235 |
| 10712548 | Slc22a18   | 0.106451  | 0.9959 | -0.443121 | 0.0441 | -0.719284 | 0.0002 | -0.577770 | 0.0017 |
| 10712648 | Mrpl21     | -0.059369 | 0.9999 | -0.189885 | 0.4859 | -0.241674 | 0.1823 | -0.369185 | 0.0257 |
| 10712706 | Chka       | -0.111086 | 0.9999 | 0.473205  | 0.2327 | 0.734145  | 0.0119 | 0.495610  | 0.1157 |
| 10712720 | Unc93b1    | 0.295444  | 0.8063 | -0.451194 | 0.0341 | -0.281785 | 0.1648 | -0.348393 | 0.0739 |
| 10712743 | Acy3       | 0.120212  | 0.9921 | -0.537798 | 0.0142 | -0.721463 | 0.0003 | -0.664976 | 0.0006 |
| 10712829 | Coro1b     | 0.135928  | 0.9413 | -0.320460 | 0.0313 | -0.426954 | 0.0010 | -0.534513 | 0.0000 |
| 10712935 | Ctsf       | 0.203713  | 0.9444 | 0.677912  | 0.0012 | 0.916739  | 0.0000 | 0.850428  | 0.0000 |
| 10712997 | Cd248      | 0.350084  | 0.9303 | -0.870315 | 0.0155 | -1.017415 | 0.0017 | -0.932758 | 0.0032 |
| 10713061 | Efemp2     | 0.002158  | 0.9999 | -0.463383 | 0.2651 | -0.744217 | 0.0125 | -0.835569 | 0.0040 |
| 10713222 | Atg2a      | 0.068021  | 0.9999 | 0.166333  | 0.4897 | 0.220132  | 0.1641 | 0.316213  | 0.0311 |
| 10713278 | Cdc42bpg   | 0.077166  | 0.9999 | 0.354780  | 0.1222 | 0.511512  | 0.0053 | 0.527516  | 0.0032 |
| 10713450 | ---        | -0.291453 | 0.8973 | -0.331245 | 0.3461 | -0.514952 | 0.0332 | -0.297987 | 0.2934 |
| 10713626 | Nxf1       | 0.116424  | 0.9921 | 0.326339  | 0.2039 | 0.387186  | 0.0507 | 0.408772  | 0.0371 |
| 10713682 | Lrrn4cl    | -0.013204 | 0.9999 | -0.281010 | 0.3486 | -0.441839 | 0.0320 | -0.342389 | 0.1185 |
| 10713796 | Ahnak      | 0.188858  | 0.9496 | -0.517281 | 0.0110 | -0.349562 | 0.0675 | -0.796685 | 0.0000 |
| 10713833 | Rab3il1    | 0.305733  | 0.8669 | -0.221588 | 0.6072 | -0.551612 | 0.0187 | -0.638071 | 0.0052 |
| 10713857 | Fads1      | 0.133472  | 0.9999 | -0.532599 | 0.4531 | -1.404817 | 0.0015 | -0.844103 | 0.0683 |
| 10713915 | Ddb1       | 0.059720  | 0.9972 | 0.199483  | 0.1582 | 0.272973  | 0.0130 | 0.243417  | 0.0283 |
| 10713974 | Slc15a3    | 0.305473  | 0.9448 | -0.665608 | 0.0556 | -0.911581 | 0.0020 | -0.987281 | 0.0007 |
| 10714020 | Ms4a11     | -0.051523 | 0.9999 | -0.199929 | 0.3528 | -0.274524 | 0.0676 | -0.311095 | 0.0344 |
| 10714080 | Osbp       | 0.020400  | 0.9999 | 0.245274  | 0.1261 | 0.327496  | 0.0106 | 0.120148  | 0.4749 |
| 10714103 | Mpeg1      | 0.295233  | 0.8930 | -0.754008 | 0.0027 | -0.988483 | 0.0000 | -1.044996 | 0.0000 |
| 10714254 | LOC499330  | -0.100688 | 0.9805 | -0.182766 | 0.3461 | -0.278618 | 0.0372 | -0.183340 | 0.2252 |
| 10714338 | Zfand5     | 0.056886  | 0.9999 | 0.179918  | 0.4907 | 0.368666  | 0.0201 | 0.328292  | 0.0409 |
| 10714456 | Dock8      | 0.143653  | 0.9921 | -0.272546 | 0.4595 | -0.567341 | 0.0130 | -0.544236 | 0.0169 |
| 10714505 | Kank1      | -0.325834 | 0.7532 | 0.604081  | 0.0022 | 0.833694  | 0.0000 | 0.752944  | 0.0001 |
| 10714709 | RGD1310016 | 0.000229  | 0.9999 | 0.485379  | 0.0502 | 0.631987  | 0.0028 | 0.508701  | 0.0162 |
| 10714818 | Papss2     | 0.079528  | 0.9999 | 0.427502  | 0.1727 | 0.342484  | 0.2030 | 0.594190  | 0.0127 |
| 10714913 | Kif20b     | 0.051632  | 0.9999 | -0.575746 | 0.2613 | -0.560610 | 0.1625 | -0.814572 | 0.0284 |
| 10714995 | Tnks2      | -0.087078 | 0.9990 | 0.143350  | 0.6820 | 0.381377  | 0.0309 | 0.341200  | 0.0586 |
| 10715025 | Btaf1      | 0.086251  | 0.9999 | 0.274183  | 0.4633 | 0.509945  | 0.0295 | 0.270502  | 0.3370 |
| 10715078 | Kif11      | 0.252491  | 0.9968 | -0.918526 | 0.0994 | -1.096242 | 0.0165 | -1.516833 | 0.0007 |
| 10715107 | Cep55      | 0.007112  | 0.9999 | -0.980861 | 0.0730 | -1.202966 | 0.0086 | -1.443873 | 0.0012 |
| 10715330 | Lcor       | 0.189616  | 0.9525 | 0.229077  | 0.4484 | 0.446974  | 0.0190 | 0.513681  | 0.0056 |
| 10715344 | ---        | 0.408784  | 0.7566 | 0.386465  | 0.2174 | 0.782946  | 0.0008 | 0.570037  | 0.0138 |
| 10715377 | Hps1       | 0.019751  | 0.9999 | -0.266229 | 0.0899 | -0.358948 | 0.0053 | -0.317619 | 0.0132 |

|          |            |           |        |           |        |           |        |           |        |
|----------|------------|-----------|--------|-----------|--------|-----------|--------|-----------|--------|
| 10715400 | Pyroxd2    | 0.005113  | 0.9999 | -0.525693 | 0.0762 | -0.662699 | 0.0073 | -0.822673 | 0.0007 |
| 10715497 | Chuk       | -0.081152 | 0.9999 | 0.227229  | 0.3982 | 0.362918  | 0.0420 | 0.293999  | 0.1200 |
| 10715667 | Kazald1    | 0.058149  | 0.9999 | -0.493842 | 0.1984 | -0.738535 | 0.0108 | -0.752514 | 0.0083 |
| 10715825 | Sufu       | -0.355139 | 0.7355 | 0.582246  | 0.0060 | 0.714796  | 0.0003 | 0.749992  | 0.0001 |
| 10715870 | RGD1311783 | -0.079423 | 0.9999 | -0.353651 | 0.2721 | -0.459999 | 0.0513 | -0.527692 | 0.0219 |
| 10715889 | Cnmn2      | -0.162782 | 0.9544 | 0.471829  | 0.0083 | 0.596337  | 0.0003 | 0.920766  | 0.0000 |
| 10715990 | Gsto1      | -0.140862 | 0.9620 | -0.234258 | 0.2821 | -0.251000 | 0.1292 | -0.328527 | 0.0364 |
| 10716064 | Mxi1       | 0.263071  | 0.8562 | 0.495656  | 0.0135 | 0.625979  | 0.0005 | 0.602457  | 0.0007 |
| 10716078 | Mxi1       | 0.375878  | 0.7989 | 0.653605  | 0.0099 | 0.823498  | 0.0004 | 0.767938  | 0.0007 |
| 10716168 | Acs15      | -0.010534 | 0.9999 | 0.385875  | 0.1069 | 0.564479  | 0.0036 | 0.644200  | 0.0007 |
| 10716250 | Nhlrc2     | -0.030594 | 0.9999 | 0.319567  | 0.1246 | 0.397058  | 0.0176 | 0.403385  | 0.0148 |
| 10716480 | Grk5       | 0.067296  | 0.9999 | 0.906159  | 0.0038 | 1.123470  | 0.0001 | 1.002160  | 0.0004 |
| 10716596 | LOC679873  | -0.086854 | 0.9224 | -0.111999 | 0.3200 | -0.181138 | 0.0211 | -0.126560 | 0.1367 |
| 10716616 | Raet11     | -0.054106 | 0.9999 | -0.199796 | 0.2403 | -0.259590 | 0.0408 | -0.212770 | 0.1121 |
| 10716657 | Map3k7ip2  | 0.075386  | 0.9972 | 0.297816  | 0.0706 | 0.446951  | 0.0012 | 0.483194  | 0.0004 |
| 10716679 | RGD1566017 | 0.335111  | 0.7989 | -0.404150 | 0.1007 | -0.412132 | 0.0448 | -0.437698 | 0.0312 |
| 10716785 | Rab32      | -0.059340 | 0.9999 | -1.057275 | 0.0009 | -1.014017 | 0.0007 | -1.009198 | 0.0006 |
| 10716984 | Heca       | -0.023930 | 0.9999 | 0.477616  | 0.0189 | 0.886263  | 0.0000 | 0.753472  | 0.0000 |
| 10716995 | Ccdc28a    | 0.227370  | 0.8724 | 0.390795  | 0.0565 | 0.549728  | 0.0016 | 0.514540  | 0.0025 |
| 10717168 | Hmgb2      | 0.106573  | 0.9999 | -0.917960 | 0.0096 | -1.173874 | 0.0003 | -1.439914 | 0.0000 |
| 10717170 | Epb4.112   | 0.136267  | 0.9942 | -0.534941 | 0.0532 | -0.433760 | 0.0789 | -0.785557 | 0.0007 |
| 10717195 | Ccnb2      | 0.098295  | 0.9999 | -1.291984 | 0.0479 | -1.631885 | 0.0035 | -2.084355 | 0.0002 |
| 10717331 | Sgk1       | 0.360056  | 0.8578 | -0.497647 | 0.1104 | -0.646845 | 0.0104 | -0.692417 | 0.0050 |
| 10717459 | Tppp       | -0.475731 | 0.3730 | -0.071520 | 0.8890 | -0.497039 | 0.0079 | -0.527598 | 0.0039 |
| 10717470 | Brd9       | 0.023446  | 0.9999 | -0.268045 | 0.4092 | -0.465075 | 0.0287 | -0.434801 | 0.0425 |
| 10717571 | Lpcat1     | 0.078527  | 0.9999 | -0.093917 | 0.8801 | -0.134001 | 0.6955 | -0.497937 | 0.0332 |
| 10717779 | Fbxo5      | 0.065451  | 0.9999 | -1.126879 | 0.0904 | -1.069495 | 0.0578 | -1.775343 | 0.0009 |
| 10717953 | ---        | 0.567073  | 0.8411 | 0.599589  | 0.2309 | 1.084923  | 0.0032 | 0.873787  | 0.0176 |
| 10718152 | ---        | -0.331539 | 0.7200 | -0.367128 | 0.0737 | -0.439826 | 0.0104 | -0.357541 | 0.0415 |
| 10718208 | Dact2      | -0.377619 | 0.8437 | 0.844821  | 0.0016 | 0.498623  | 0.0533 | 0.957054  | 0.0001 |
| 10718217 | Thbs2      | 0.247698  | 0.9921 | -0.535042 | 0.3153 | -1.005063 | 0.0063 | -1.435346 | 0.0001 |
| 10718266 | Phf10      | 0.041640  | 0.9999 | 0.354533  | 0.0335 | 0.425534  | 0.0034 | 0.160137  | 0.3755 |
| 10718520 | Cnot3      | 0.158343  | 0.9624 | 0.305788  | 0.2077 | 0.244805  | 0.2357 | 0.376394  | 0.0433 |
| 10718696 | Znf667     | 0.181128  | 0.8973 | 0.270145  | 0.1582 | 0.226074  | 0.1640 | 0.416337  | 0.0041 |
| 10718725 | Nlrp5      | -0.294606 | 0.3730 | -0.199043 | 0.1966 | -0.292133 | 0.0120 | -0.210635 | 0.0874 |
| 10718803 | U2af2      | -0.037687 | 0.9999 | -0.170384 | 0.2077 | -0.069031 | 0.6297 | -0.251416 | 0.0123 |
| 10718835 | RGD1565772 | 0.239628  | 0.8872 | -0.074525 | 0.8846 | -0.411751 | 0.0321 | -0.291920 | 0.1654 |
| 10718852 | Nat14      | 0.042910  | 0.9999 | 0.157384  | 0.5744 | 0.381521  | 0.0146 | 0.223270  | 0.2088 |
| 10718881 | Brsk1      | -0.074874 | 0.9999 | 0.537091  | 0.0155 | 0.615451  | 0.0021 | 0.505488  | 0.0106 |
| 10718934 | Fcar       | -0.184616 | 0.7200 | -0.083350 | 0.6114 | -0.171498 | 0.0596 | -0.256042 | 0.0029 |
| 10718954 | Lilrb4     | 0.644453  | 0.7989 | -1.269078 | 0.0031 | -1.464013 | 0.0003 | -1.528623 | 0.0001 |
| 10719204 | Ehd2       | 0.120170  | 0.9972 | -0.386527 | 0.1787 | -0.545466 | 0.0131 | -0.536202 | 0.0142 |
| 10719232 | Gltscr1    | 0.323326  | 0.8557 | 0.167348  | 0.7173 | 0.125060  | 0.7036 | 0.474397  | 0.0338 |
| 10719265 | Grif1      | 0.008801  | 0.9999 | 0.365134  | 0.3617 | 0.554668  | 0.0426 | 0.654232  | 0.0140 |
| 10719294 | Calm3      | -0.001810 | 0.9999 | -0.252355 | 0.1734 | -0.360833 | 0.0113 | -0.361265 | 0.0102 |
| 10719364 | RGD1307390 | -0.087571 | 0.9819 | -0.314410 | 0.0141 | -0.160084 | 0.2183 | -0.357445 | 0.0015 |
| 10719501 | Clptm1     | 0.005718  | 0.9999 | 0.176656  | 0.2230 | 0.276295  | 0.0101 | 0.318766  | 0.0023 |

|          |            |           |        |           |        |           |        |           |        |
|----------|------------|-----------|--------|-----------|--------|-----------|--------|-----------|--------|
| 10719530 | Apoe       | 0.381135  | 0.8614 | -0.827568 | 0.0060 | -0.961090 | 0.0005 | -1.215031 | 0.0000 |
| 10719538 | Tomm40     | -0.086002 | 0.9921 | -0.193273 | 0.3331 | -0.293854 | 0.0344 | -0.343457 | 0.0109 |
| 10719754 | Grik5      | 0.244322  | 0.8339 | 0.278009  | 0.1756 | 0.284287  | 0.0849 | 0.377511  | 0.0162 |
| 10719817 | Pafah1b3   | 0.004496  | 0.9999 | -0.226484 | 0.3181 | -0.209116 | 0.2410 | -0.480724 | 0.0017 |
| 10719829 | Lipe       | -0.025486 | 0.9999 | 0.177328  | 0.6466 | 0.233301  | 0.3241 | 0.403831  | 0.0490 |
| 10719900 | Axl        | -0.098349 | 0.9999 | -0.395417 | 0.4233 | -0.402977 | 0.2674 | -0.753862 | 0.0162 |
| 10720111 | Map3k10    | 0.025445  | 0.9999 | 0.278847  | 0.1481 | 0.192607  | 0.2705 | 0.310699  | 0.0448 |
| 10720130 | ---        | -0.024119 | 0.9999 | 0.161213  | 0.5193 | 0.305413  | 0.0422 | 0.206603  | 0.2217 |
| 10720166 | Supt5h     | 0.112779  | 0.9867 | 0.304546  | 0.1231 | 0.468080  | 0.0030 | 0.501227  | 0.0011 |
| 10720224 | Samd4b     | 0.166725  | 0.9620 | 0.139082  | 0.7141 | 0.218083  | 0.3073 | 0.378911  | 0.0407 |
| 10720430 | Psm8       | -0.156728 | 0.9921 | 0.474183  | 0.1574 | 0.706184  | 0.0065 | 0.707252  | 0.0055 |
| 10720479 | Spint2     | -0.044628 | 0.9999 | 0.342080  | 0.0502 | 0.320582  | 0.0351 | 0.512076  | 0.0005 |
| 10720522 | RGD1564344 | 0.043598  | 0.9999 | 0.156989  | 0.4174 | 0.289206  | 0.0208 | 0.227221  | 0.0822 |
| 10720526 | ---        | 0.038965  | 0.9999 | 0.482977  | 0.2657 | 0.738184  | 0.0184 | 0.390559  | 0.2910 |
| 10720531 | ---        | 0.154174  | 0.9998 | 0.728299  | 0.0525 | 0.950338  | 0.0030 | 0.928548  | 0.0030 |
| 10720552 | RGD1563239 | 0.156877  | 0.9624 | 0.285731  | 0.2561 | 0.431966  | 0.0179 | 0.456946  | 0.0108 |
| 10720572 | Aplp1      | 0.057945  | 0.9999 | 0.651520  | 0.0728 | 0.652600  | 0.0345 | 0.532664  | 0.1005 |
| 10720636 | RGD1565712 | 0.181203  | 0.9010 | 0.290134  | 0.1256 | 0.268225  | 0.0918 | 0.444209  | 0.0025 |
| 10720648 | Lin37      | -0.015236 | 0.9999 | 0.162969  | 0.6609 | 0.394512  | 0.0413 | 0.276085  | 0.1981 |
| 10720847 | Lsr        | -0.025448 | 0.9999 | 0.102696  | 0.8483 | 0.118054  | 0.7080 | 0.449006  | 0.0362 |
| 10720907 | Scn1b      | 0.085426  | 0.9999 | 0.383671  | 0.1708 | 0.232174  | 0.3759 | 0.563141  | 0.0079 |
| 10720918 | Gramd1a    | 0.051389  | 0.9999 | 0.310805  | 0.1576 | 0.442904  | 0.0095 | 0.349810  | 0.0459 |
| 10721014 | ---        | 0.131684  | 0.9921 | 0.219580  | 0.5242 | 0.571154  | 0.0046 | 0.339262  | 0.1206 |
| 10721028 | Lsm14a     | -0.005802 | 0.9999 | 0.167204  | 0.4646 | 0.321975  | 0.0240 | 0.252354  | 0.0919 |
| 10721038 | Kctd15     | -0.057314 | 0.9999 | -0.276248 | 0.4820 | -0.385221 | 0.1302 | -0.549694 | 0.0209 |
| 10721145 | Znf507     | 0.260974  | 0.8669 | 0.092328  | 0.8568 | 0.514993  | 0.0095 | 0.176893  | 0.5035 |
| 10721176 | Ccne1      | 0.060444  | 0.9999 | -0.327017 | 0.4137 | -0.258613 | 0.4218 | -0.702204 | 0.0054 |
| 10721234 | ---        | 0.366635  | 0.9544 | 0.537807  | 0.3199 | 0.874917  | 0.0202 | 0.506825  | 0.2421 |
| 10721240 | Igln5      | -0.080769 | 0.9999 | 0.368710  | 0.2226 | 0.326091  | 0.1880 | 0.556770  | 0.0120 |
| 10721261 | LOC687856  | 0.253238  | 0.8063 | -0.271584 | 0.2002 | -0.419358 | 0.0086 | -0.217740 | 0.2389 |
| 10721394 | Pold1      | 0.141240  | 0.9852 | 0.028291  | 0.9691 | -0.410770 | 0.0370 | -0.412287 | 0.0359 |
| 10721421 | Nr1h2      | 0.007675  | 0.9999 | 0.201118  | 0.1363 | 0.258253  | 0.0159 | 0.200344  | 0.0735 |
| 10721433 | Myh14      | 0.141067  | 0.9570 | 0.271122  | 0.1414 | 0.325668  | 0.0267 | 0.320415  | 0.0287 |
| 10721684 | Rpl13a     | -0.187952 | 0.9310 | -0.321484 | 0.1595 | -0.432692 | 0.0151 | -0.350034 | 0.0568 |
| 10721802 | Snrnp70    | 0.096193  | 0.9972 | 0.128357  | 0.7353 | 0.379773  | 0.0345 | 0.138045  | 0.5747 |
| 10721834 | Bax        | -0.005203 | 0.9999 | 0.266311  | 0.3460 | 0.536348  | 0.0049 | 0.333822  | 0.1024 |
| 10721962 | Emp3       | -0.102903 | 0.9999 | -0.542982 | 0.1104 | -0.713617 | 0.0095 | -0.810131 | 0.0025 |
| 10722220 | Mrgprb13   | -0.220471 | 0.7200 | -0.186330 | 0.1874 | -0.232124 | 0.0336 | -0.267503 | 0.0119 |
| 10722247 | E2f8       | 0.097467  | 0.9977 | -0.148487 | 0.6902 | -0.354123 | 0.0622 | -0.420586 | 0.0227 |
| 10722443 | ---        | -0.064300 | 0.9999 | -0.184744 | 0.4782 | -0.266878 | 0.1115 | -0.377123 | 0.0169 |
| 10722692 | ---        | 0.151515  | 0.9223 | 0.019762  | 0.9692 | -0.028477 | 0.9112 | 0.360930  | 0.0067 |
| 10722818 | Slco3a1    | -0.058182 | 0.9999 | 0.341009  | 0.1727 | 0.420048  | 0.0312 | 0.372856  | 0.0617 |
| 10722903 | Mfge8      | -0.050627 | 0.9999 | 0.345750  | 0.0651 | 0.315340  | 0.0525 | 0.426167  | 0.0060 |
| 10722992 | Anpep      | 0.466587  | 0.8770 | -0.934725 | 0.0203 | -1.252628 | 0.0005 | -1.298484 | 0.0003 |
| 10723013 | RGD1311021 | 0.095064  | 0.9921 | -0.213045 | 0.3544 | -0.430480 | 0.0053 | -0.304932 | 0.0572 |
| 10723020 | Idh2       | -0.023380 | 0.9999 | -0.323083 | 0.2916 | -0.422177 | 0.0582 | -0.620747 | 0.0032 |
| 10723131 | Blm        | 0.018517  | 0.9999 | -0.225754 | 0.1755 | -0.335238 | 0.0087 | -0.386379 | 0.0019 |

|          |            |           |        |           |        |           |        |           |        |
|----------|------------|-----------|--------|-----------|--------|-----------|--------|-----------|--------|
| 10723351 | Il16       | -0.066658 | 0.9990 | -0.398142 | 0.0060 | -0.459349 | 0.0006 | -0.398319 | 0.0022 |
| 10723383 | RGD1305254 | 0.669697  | 0.9010 | -1.394963 | 0.0287 | -1.617280 | 0.0038 | -1.935714 | 0.0004 |
| 10723523 | Folh1      | -0.186445 | 0.7200 | -0.209019 | 0.0479 | -0.196652 | 0.0325 | -0.129295 | 0.2111 |
| 10723623 | ---        | 0.011101  | 0.9999 | 0.286470  | 0.0784 | 0.214343  | 0.1424 | 0.341921  | 0.0107 |
| 10723701 | Usp35      | 0.063471  | 0.9999 | 0.238790  | 0.3017 | 0.505010  | 0.0018 | 0.225602  | 0.2260 |
| 10723740 | Myo7a      | 0.273658  | 0.9038 | -0.176659 | 0.7171 | -0.446899 | 0.0625 | -0.508087 | 0.0306 |
| 10723792 | Capn5      | 0.049426  | 0.9999 | -0.520922 | 0.0202 | -0.503780 | 0.0121 | -0.546813 | 0.0054 |
| 10723902 | Slco2b1    | 0.023712  | 0.9999 | -0.354342 | 0.0489 | -0.304337 | 0.0545 | -0.254628 | 0.1284 |
| 10723982 | Mrpl48     | 0.027597  | 0.9999 | -0.179859 | 0.7359 | -0.256558 | 0.4037 | -0.508135 | 0.0457 |
| 10724042 | P2ry2      | -0.119152 | 0.9942 | -0.306923 | 0.2930 | -0.473412 | 0.0229 | -0.378605 | 0.0809 |
| 10724111 | Folr2      | 0.197675  | 0.9868 | -1.102783 | 0.0002 | -1.271467 | 0.0000 | -1.198967 | 0.0000 |
| 10724238 | Olr63      | -0.412262 | 0.9619 | -0.680308 | 0.2610 | -0.931570 | 0.0351 | -1.033534 | 0.0172 |
| 10724288 | ---        | 0.060372  | 0.9999 | 0.184841  | 0.4233 | 0.076576  | 0.7337 | 0.448738  | 0.0017 |
| 10724327 | Hbe2       | -0.147004 | 0.8650 | -0.179214 | 0.2318 | -0.283899 | 0.0101 | -0.157471 | 0.2110 |
| 10724335 | Olr129     | -0.118372 | 0.7409 | -0.061639 | 0.6221 | -0.166682 | 0.0121 | -0.071239 | 0.3908 |
| 10724464 | Prkcdbp    | -0.123497 | 0.9624 | -0.196780 | 0.3402 | -0.235417 | 0.1142 | -0.315543 | 0.0255 |
| 10724745 | St5        | 0.135359  | 0.9867 | -0.157914 | 0.6726 | -0.392191 | 0.0408 | -0.233861 | 0.2964 |
| 10724819 | Dennd5a    | -0.077439 | 0.9968 | 0.245927  | 0.1779 | 0.281306  | 0.0500 | 0.240018  | 0.1106 |
| 10724848 | RGD1559442 | 0.270341  | 0.8773 | -0.258538 | 0.4349 | -0.257428 | 0.2939 | -0.432272 | 0.0438 |
| 10724950 | Galnt14    | 0.139516  | 0.9921 | 0.995211  | 0.0000 | 0.986890  | 0.0000 | 1.103917  | 0.0000 |
| 10724967 | Dkk3       | 0.192267  | 0.9867 | 0.606874  | 0.0565 | 0.580242  | 0.0351 | 0.805694  | 0.0022 |
| 10725114 | Pik3c2a    | 0.240319  | 0.9620 | 0.542476  | 0.0938 | 0.975083  | 0.0003 | 0.802540  | 0.0019 |
| 10725164 | Arl6ip1    | -0.034293 | 0.9999 | -0.494374 | 0.1222 | -0.516579 | 0.0492 | -0.468021 | 0.0835 |
| 10725172 | RGD1563508 | 0.195109  | 0.9430 | 0.111433  | 0.8037 | 0.402309  | 0.0351 | 0.283395  | 0.1781 |
| 10725235 | Syt17      | -0.176999 | 0.9620 | 0.481391  | 0.0251 | 0.489101  | 0.0103 | 0.335255  | 0.0993 |
| 10725245 | Coq7       | -0.090536 | 0.9999 | -0.344247 | 0.2600 | -0.467532 | 0.0363 | -0.558033 | 0.0101 |
| 10725253 | Tmc7       | 0.014138  | 0.9999 | 0.589879  | 0.0319 | 0.680582  | 0.0046 | 0.647196  | 0.0061 |
| 10725279 | Gprc5b     | 0.179754  | 0.9620 | 0.299339  | 0.2723 | 0.416500  | 0.0352 | 0.518130  | 0.0067 |
| 10725340 | Dcun1d3    | 0.032746  | 0.9999 | 0.286982  | 0.4275 | 0.475460  | 0.0427 | 0.246762  | 0.3901 |
| 10725407 | Usp31      | 0.036962  | 0.9999 | 0.693044  | 0.0000 | 0.925241  | 0.0000 | 0.771912  | 0.0000 |
| 10725445 | Gga2       | 0.068350  | 0.9990 | -0.111868 | 0.6890 | -0.274797 | 0.0527 | -0.300807 | 0.0311 |
| 10725556 | Nsmce1     | 0.031490  | 0.9999 | -0.319085 | 0.1578 | -0.398551 | 0.0248 | -0.473335 | 0.0060 |
| 10725569 | Gtf3c1     | 0.101371  | 0.9921 | 0.146704  | 0.6107 | 0.332275  | 0.0353 | 0.191758  | 0.3012 |
| 10725610 | Gsg11      | 0.307174  | 0.4509 | -0.184273 | 0.3150 | -0.267986 | 0.0384 | -0.237032 | 0.0756 |
| 10725701 | Atxn2l     | 0.055973  | 0.9999 | 0.318989  | 0.2327 | 0.248867  | 0.2747 | 0.410669  | 0.0407 |
| 10725724 | Eif3c      | 0.064614  | 0.9942 | 0.205927  | 0.1509 | 0.255741  | 0.0238 | 0.265307  | 0.0176 |
| 10725750 | Cln3       | 0.231999  | 0.8437 | 0.090572  | 0.8063 | 0.203256  | 0.2501 | 0.327747  | 0.0370 |
| 10725795 | Giyd2      | -0.214826 | 0.8437 | -0.227775 | 0.2471 | -0.242341 | 0.1096 | -0.337143 | 0.0182 |
| 10725806 | Coro1a     | 0.380512  | 0.9136 | -1.082963 | 0.0022 | -1.326056 | 0.0001 | -1.178745 | 0.0003 |
| 10725832 | Aldoa      | 0.048857  | 0.9971 | 0.126720  | 0.3282 | 0.176180  | 0.0545 | 0.196943  | 0.0284 |
| 10725927 | Kif22      | 0.118895  | 0.9999 | -0.826546 | 0.1282 | -0.869986 | 0.0507 | -1.381682 | 0.0011 |
| 10726045 | Bcl7c      | 0.030361  | 0.9999 | -0.423788 | 0.0646 | -0.490249 | 0.0113 | -0.596034 | 0.0016 |
| 10726108 | Pycard     | 0.078006  | 0.9999 | -0.257431 | 0.2835 | -0.420309 | 0.0135 | -0.326022 | 0.0662 |
| 10726118 | ---        | 0.027288  | 0.9999 | 0.215209  | 0.4339 | 0.224170  | 0.2641 | 0.352496  | 0.0490 |
| 10726408 | Mki67      | 0.228046  | 0.9999 | -0.896812 | 0.2192 | -0.971587 | 0.0875 | -1.770170 | 0.0008 |
| 10726550 | Adam8      | -0.074000 | 0.9898 | -0.057528 | 0.8263 | -0.222268 | 0.0414 | -0.122933 | 0.3475 |
| 10726574 | Tubgcp2    | 0.159171  | 0.9624 | -0.308240 | 0.1861 | -0.278349 | 0.1472 | -0.489596 | 0.0048 |



|          |           |           |        |           |        |           |        |           |        |
|----------|-----------|-----------|--------|-----------|--------|-----------|--------|-----------|--------|
| 10726611 | Echs1     | 0.111795  | 0.9999 | -0.384630 | 0.2800 | -0.394425 | 0.1499 | -0.518013 | 0.0457 |
| 10726669 | Cox8b     | 0.128449  | 0.9999 | -0.474165 | 0.5417 | -1.017152 | 0.0246 | -0.888006 | 0.0546 |
| 10726679 | Ifitm2    | 0.090047  | 0.9999 | -0.487558 | 0.0654 | -0.426964 | 0.0641 | -0.753044 | 0.0006 |
| 10726682 | Ifitm3    | 0.147897  | 0.9942 | -1.355551 | 0.0000 | -1.449343 | 0.0000 | -1.536451 | 0.0000 |
| 10726821 | Cend1     | -0.124073 | 0.9998 | 0.040965  | 0.9662 | 0.130209  | 0.7431 | 0.641674  | 0.0116 |
| 10726924 | Hcca2     | -0.029819 | 0.9999 | 0.143777  | 0.5935 | 0.442031  | 0.0028 | 0.215324  | 0.1987 |
| 10726979 | Ctsd      | 0.163723  | 0.9170 | -0.132993 | 0.6211 | -0.298897 | 0.0406 | -0.045583 | 0.8593 |
| 10727122 | Osbpl5    | 0.081853  | 0.9999 | -0.199222 | 0.5193 | -0.124451 | 0.6273 | -0.494989 | 0.0055 |
| 10727329 | Saps3     | 0.025274  | 0.9999 | 0.258356  | 0.4269 | 0.438834  | 0.0370 | 0.336500  | 0.1362 |
| 10727462 | Rpl35a    | -0.017409 | 0.9999 | -0.091389 | 0.8598 | -0.479821 | 0.0166 | -0.349247 | 0.1014 |
| 10727558 | Kdm2a     | 0.192367  | 0.9199 | 0.263125  | 0.2640 | 0.557099  | 0.0009 | 0.380910  | 0.0249 |
| 10727634 | Rbm4      | 0.231882  | 0.9136 | 0.311745  | 0.2679 | 0.447666  | 0.0284 | 0.246162  | 0.3073 |
| 10727740 | Klc2      | -0.209039 | 0.8945 | 0.255388  | 0.2847 | 0.484738  | 0.0041 | 0.499787  | 0.0024 |
| 10727846 | Drap1     | -0.060718 | 0.9999 | -0.219397 | 0.3611 | -0.294463 | 0.0797 | -0.345341 | 0.0341 |
| 10727867 | Mus81     | 0.106723  | 0.9942 | 0.232227  | 0.4093 | 0.460151  | 0.0114 | 0.356230  | 0.0584 |
| 10727924 | Sipa1     | -0.096134 | 0.9999 | -0.191475 | 0.6646 | -0.495699 | 0.0295 | -0.454375 | 0.0492 |
| 10727977 | Ehbp111   | -0.306840 | 0.7989 | 0.287605  | 0.2699 | 0.438936  | 0.0193 | 0.239793  | 0.2756 |
| 10727999 | Mtvr2     | 0.140724  | 0.9630 | 0.285607  | 0.1901 | 0.332320  | 0.0504 | 0.368284  | 0.0272 |
| 10728028 | ---       | 0.249247  | 0.9921 | 0.469340  | 0.4284 | 1.253270  | 0.0009 | 1.027627  | 0.0054 |
| 10728057 | Cdc42ep2  | -0.027546 | 0.9999 | -0.460185 | 0.0440 | -0.523179 | 0.0077 | -0.705081 | 0.0003 |
| 10728164 | Ppp2r5b   | -0.088407 | 0.9921 | 0.512192  | 0.0006 | 0.395044  | 0.0047 | 0.477324  | 0.0005 |
| 10728269 | Gpr137    | 0.029864  | 0.9999 | 0.318917  | 0.3391 | 0.461724  | 0.0474 | 0.639128  | 0.0039 |
| 10728346 | Fermt3    | 0.368660  | 0.7989 | -0.683787 | 0.0044 | -0.903141 | 0.0001 | -0.889344 | 0.0001 |
| 10728396 | Mark2     | 0.103986  | 0.9805 | 0.171788  | 0.4158 | 0.294308  | 0.0324 | 0.292354  | 0.0332 |
| 10728440 | Cdca5     | -0.004688 | 0.9999 | -0.530519 | 0.1268 | -0.746429 | 0.0070 | -0.918992 | 0.0007 |
| 10728597 | Incenp    | 0.077580  | 0.9999 | -0.363374 | 0.1361 | -0.337938 | 0.0957 | -0.410105 | 0.0363 |
| 10728800 | Tmem132a  | -0.037133 | 0.9999 | 0.302850  | 0.1608 | 0.288572  | 0.1025 | 0.346429  | 0.0435 |
| 10728904 | Ms4a7     | 0.116253  | 0.9999 | -0.578818 | 0.1958 | -0.922820 | 0.0061 | -0.728243 | 0.0333 |
| 10728924 | Ms4a6b    | 0.242696  | 0.8948 | -0.512641 | 0.0196 | -0.459304 | 0.0206 | -0.479730 | 0.0141 |
| 10728930 | LOC690930 | 0.124058  | 0.9630 | -0.412532 | 0.0100 | -0.481579 | 0.0009 | -0.541050 | 0.0002 |
| 10728986 | Olr322    | 0.033972  | 0.9999 | 0.034817  | 0.9074 | -0.031740 | 0.8638 | 0.231117  | 0.0292 |
| 10729009 | Dtx4      | 0.202420  | 0.9620 | -0.810120 | 0.0005 | -0.879835 | 0.0001 | -1.122298 | 0.0000 |
| 10729124 | Vps13a    | 0.182093  | 0.9620 | 0.286921  | 0.2989 | 0.506155  | 0.0090 | 0.348357  | 0.0904 |
| 10729252 | Ostf1     | -0.003647 | 0.9999 | -0.289442 | 0.3725 | -0.333258 | 0.1546 | -0.449879 | 0.0410 |
| 10729269 | Anxa1     | 0.134966  | 0.9998 | -0.369080 | 0.4036 | -0.596251 | 0.0410 | -0.726381 | 0.0101 |
| 10729314 | Gda       | 0.067564  | 0.9999 | -0.940015 | 0.1818 | -1.390252 | 0.0097 | -1.188387 | 0.0286 |
| 10729348 | Klf9      | 0.074675  | 0.9999 | 0.224350  | 0.5222 | 0.335546  | 0.1275 | 0.509398  | 0.0124 |
| 10729350 | Smc5      | 0.151324  | 0.9921 | 0.261797  | 0.5045 | 0.499695  | 0.0349 | 0.386036  | 0.1272 |
| 10729409 | Tjp2      | -0.089480 | 0.9977 | 0.232182  | 0.3455 | 0.404358  | 0.0155 | 0.307344  | 0.0796 |
| 10729525 | Rfx3      | 0.122001  | 0.9867 | 0.257418  | 0.2821 | 0.355163  | 0.0404 | 0.289726  | 0.1137 |
| 10729552 | ---       | 0.033497  | 0.9999 | 0.542307  | 0.0621 | 0.558457  | 0.0248 | 0.332597  | 0.2440 |
| 10729629 | ---       | 0.079366  | 0.9999 | 0.282861  | 0.2953 | 0.418726  | 0.0300 | 0.300822  | 0.1516 |
| 10729802 | Pank1     | -0.102708 | 0.9999 | 0.284026  | 0.4383 | 0.626550  | 0.0067 | 0.660660  | 0.0034 |
| 10729898 | Cyp26c1   | 0.066933  | 0.9999 | 0.052083  | 0.9027 | 0.100647  | 0.6352 | 0.314918  | 0.0393 |
| 10730057 | Pdlim1    | -0.308530 | 0.8190 | 0.357295  | 0.1577 | 0.397282  | 0.0487 | 0.494545  | 0.0109 |
| 10730131 | Blnk      | 0.139992  | 0.9136 | -0.148604 | 0.4403 | -0.272557 | 0.0267 | -0.200694 | 0.1286 |
| 10730190 | Pik3ap1   | 0.235327  | 0.9310 | -0.427025 | 0.1230 | -0.480274 | 0.0328 | -0.337278 | 0.1724 |

|          |            |           |        |           |        |           |        |           |        |
|----------|------------|-----------|--------|-----------|--------|-----------|--------|-----------|--------|
| 10730297 | Zfyve27    | -0.011959 | 0.9999 | 0.347412  | 0.0722 | 0.454584  | 0.0048 | 0.545113  | 0.0006 |
| 10730636 | Calhm2     | -0.048489 | 0.9999 | -0.264895 | 0.3712 | -0.314152 | 0.1385 | -0.482350 | 0.0136 |
| 10730855 | Mxi1       | 0.240525  | 0.8628 | 0.471548  | 0.0187 | 0.593844  | 0.0009 | 0.585084  | 0.0009 |
| 10730869 | Add3       | 0.192158  | 0.9412 | -0.596724 | 0.0024 | -0.740159 | 0.0001 | -0.791737 | 0.0000 |
| 10731075 | Gfra1      | -0.042825 | 0.9999 | -0.570065 | 0.0012 | -0.729418 | 0.0000 | -0.752091 | 0.0000 |
| 10731156 | RGD1308127 | -0.062402 | 0.9999 | 0.376019  | 0.1748 | 0.515666  | 0.0156 | 0.535994  | 0.0107 |
| 10731229 | Bfar       | 0.131009  | 0.9875 | 0.258120  | 0.3528 | 0.470902  | 0.0120 | 0.368932  | 0.0570 |
| 10731343 | LOC688708  | 0.116020  | 0.9921 | 0.354364  | 0.1275 | 0.364318  | 0.0564 | 0.382471  | 0.0442 |
| 10731348 | Ntan1      | 0.117487  | 0.9620 | 0.192265  | 0.2811 | 0.294727  | 0.0210 | 0.205064  | 0.1386 |
| 10731428 | Gspt1      | 0.039940  | 0.9999 | 0.159820  | 0.4349 | 0.289413  | 0.0275 | 0.249040  | 0.0646 |
| 10731508 | Tnp2       | 0.023852  | 0.9999 | 0.067523  | 0.7409 | 0.139281  | 0.1786 | 0.194023  | 0.0444 |
| 10731514 | Dexi       | -0.149189 | 0.9819 | 0.373113  | 0.1307 | 0.525991  | 0.0073 | 0.577062  | 0.0025 |
| 10731531 | Emp2       | 0.023020  | 0.9999 | 0.470758  | 0.2298 | 0.331768  | 0.3350 | 0.631156  | 0.0306 |
| 10731591 | Carhsp1    | 0.075976  | 0.9999 | 0.281714  | 0.2723 | 0.444854  | 0.0155 | 0.426451  | 0.0199 |
| 10731711 | Anks3      | 0.173555  | 0.8987 | 0.146036  | 0.5660 | 0.308727  | 0.0333 | 0.149939  | 0.4050 |
| 10731783 | Magmas     | -0.314304 | 0.9223 | -0.336455 | 0.4531 | -0.655124 | 0.0203 | -0.652415 | 0.0198 |
| 10731872 | Btbd12     | 0.148206  | 0.9819 | 0.169590  | 0.6623 | 0.427326  | 0.0336 | 0.137523  | 0.6328 |
| 10731970 | Pkmyt1     | -0.089716 | 0.9999 | -0.284087 | 0.3696 | -0.350493 | 0.1180 | -0.570049 | 0.0058 |
| 10732021 | Abca3      | 0.210330  | 0.8973 | 0.279601  | 0.2334 | 0.338384  | 0.0569 | 0.371381  | 0.0338 |
| 10732257 | Nme3       | 0.049158  | 0.9999 | -0.175333 | 0.5570 | -0.082922 | 0.7535 | -0.353870 | 0.0399 |
| 10732644 | Stc2       | 0.375208  | 0.9336 | -0.680921 | 0.1271 | -0.916721 | 0.0101 | -0.736200 | 0.0434 |
| 10732649 | Nkx2-5     | -0.163716 | 0.9620 | 0.251834  | 0.3461 | 0.457832  | 0.0114 | 0.474298  | 0.0077 |
| 10732652 | Dusp1      | -0.265489 | 0.9624 | 0.768708  | 0.0228 | 1.161396  | 0.0001 | 1.219319  | 0.0001 |
| 10732697 | Fbxw11     | 0.004544  | 0.9999 | 0.170002  | 0.3752 | 0.364316  | 0.0040 | 0.105147  | 0.5468 |
| 10732725 | Lcp2       | 0.229915  | 0.9010 | -0.388237 | 0.1005 | -0.610306 | 0.0015 | -0.496065 | 0.0091 |
| 10732750 | Slit3      | 0.639281  | 0.4739 | -2.050694 | 0.0000 | -2.400759 | 0.0000 | -2.277467 | 0.0000 |
| 10732821 | Rpl32      | -0.044163 | 0.9999 | -0.158630 | 0.5377 | -0.370610 | 0.0126 | -0.398373 | 0.0063 |
| 10733004 | ---        | -0.291536 | 0.9136 | 0.533233  | 0.0786 | 0.661972  | 0.0087 | 0.643461  | 0.0099 |
| 10733056 | Ifi47      | 0.200395  | 0.9659 | -0.493120 | 0.1083 | -0.562849 | 0.0252 | -0.510009 | 0.0456 |
| 10733069 | Mgat1      | -0.216207 | 0.9136 | 0.429649  | 0.0510 | 0.308940  | 0.1245 | 0.509288  | 0.0058 |
| 10733084 | Olr1393    | 0.018782  | 0.9999 | 0.031584  | 0.9351 | 0.175548  | 0.2132 | 0.261735  | 0.0414 |
| 10733102 | Flt4       | -0.446130 | 0.8835 | 1.302642  | 0.0004 | 1.116994  | 0.0013 | 1.445380  | 0.0000 |
| 10733225 | Mgat4b     | 0.076815  | 0.9999 | 0.446292  | 0.0185 | 0.490957  | 0.0038 | 0.625545  | 0.0002 |
| 10733258 | Adamts2    | 0.061863  | 0.9999 | -0.297558 | 0.5709 | -0.668480 | 0.0243 | -0.965989 | 0.0007 |
| 10733380 | Nhp2       | -0.227575 | 0.8614 | -0.189374 | 0.4762 | -0.298310 | 0.0770 | -0.366581 | 0.0242 |
| 10733484 | Aff4       | 0.032608  | 0.9999 | 0.420583  | 0.0220 | 0.686152  | 0.0000 | 0.615205  | 0.0002 |
| 10733564 | P4ha2      | 0.377236  | 0.8872 | -0.532293 | 0.1675 | -0.638133 | 0.0350 | -0.411707 | 0.2303 |
| 10733690 | Gm2a       | 0.280769  | 0.8614 | -0.546071 | 0.0164 | -0.668423 | 0.0011 | -0.547277 | 0.0066 |
| 10733790 | Igtp       | 0.019250  | 0.9999 | -0.246465 | 0.2061 | -0.396336 | 0.0066 | -0.332628 | 0.0235 |
| 10733938 | Hist3h2ba  | -0.213622 | 0.9620 | -0.481090 | 0.0747 | -0.567746 | 0.0120 | -0.405815 | 0.0905 |
| 10733940 | Hist3h2a   | -0.031834 | 0.9999 | -0.211283 | 0.4538 | -0.424127 | 0.0165 | -0.373841 | 0.0366 |
| 10733972 | Jmjd4      | 0.029990  | 0.9999 | 0.170043  | 0.6520 | 0.399698  | 0.0439 | 0.274592  | 0.2166 |
| 10733997 | Mprip      | 0.084820  | 0.9942 | 0.329942  | 0.0501 | 0.419392  | 0.0036 | 0.204057  | 0.2166 |
| 10734061 | LOC691649  | 0.285959  | 0.8570 | 0.388129  | 0.1171 | 0.411114  | 0.0433 | 0.206423  | 0.4138 |
| 10734148 | Alkbh5     | 0.208358  | 0.8614 | 0.233105  | 0.2790 | 0.402671  | 0.0085 | 0.316353  | 0.0434 |
| 10734185 | Smcr8      | 0.070781  | 0.9999 | 0.228448  | 0.4828 | 0.388169  | 0.0551 | 0.397887  | 0.0493 |
| 10734228 | Aldh3a1    | -0.332784 | 0.9624 | -1.866150 | 0.0000 | -1.954856 | 0.0000 | -2.160538 | 0.0000 |

|          |            |           |        |           |        |           |        |           |        |
|----------|------------|-----------|--------|-----------|--------|-----------|--------|-----------|--------|
| 10734270 | Cytsb      | -0.176849 | 0.9867 | 0.920424  | 0.0004 | 0.688868  | 0.0047 | 0.618407  | 0.0105 |
| 10734320 | Trpv2      | 0.125374  | 0.9999 | -0.623375 | 0.0448 | -0.776654 | 0.0036 | -0.817366 | 0.0017 |
| 10734493 | Myh3       | -0.284338 | 0.9631 | 0.610864  | 0.1575 | 0.716397  | 0.0358 | 1.036279  | 0.0015 |
| 10734673 | Gas7       | 0.354064  | 0.8063 | -1.085158 | 0.0000 | -1.154540 | 0.0000 | -1.225627 | 0.0000 |
| 10734853 | Aurkb      | 0.084787  | 0.9999 | -0.925193 | 0.0472 | -0.909682 | 0.0246 | -1.580266 | 0.0001 |
| 10734970 | Lsm1       | -0.114664 | 0.9819 | -0.161435 | 0.5523 | -0.222070 | 0.1961 | -0.314282 | 0.0474 |
| 10734994 | Fxr2       | 0.004890  | 0.9999 | 0.327300  | 0.0363 | 0.366793  | 0.0068 | 0.402770  | 0.0023 |
| 10735315 | Rpl36a     | -0.031543 | 0.9999 | -0.145577 | 0.7474 | -0.469457 | 0.0244 | -0.405320 | 0.0575 |
| 10735319 | Rnf167     | 0.125321  | 0.9857 | 0.145556  | 0.6706 | 0.221447  | 0.2661 | 0.383123  | 0.0278 |
| 10735331 | Eno3       | 0.093367  | 0.9999 | -0.986712 | 0.0325 | -1.024304 | 0.0112 | -1.287650 | 0.0011 |
| 10735424 | Fam64a     | 0.043769  | 0.9999 | -0.597785 | 0.2905 | -0.910119 | 0.0244 | -1.138882 | 0.0035 |
| 10735771 | Olr1520    | 0.042250  | 0.9999 | 0.343956  | 0.0159 | 0.030171  | 0.8989 | 0.121278  | 0.4722 |
| 10735887 | ---        | -0.300608 | 0.9525 | 0.368190  | 0.4383 | 0.641777  | 0.0353 | 0.619272  | 0.0439 |
| 10735949 | Scarf1     | 0.122168  | 0.9953 | -0.189446 | 0.6509 | -0.496768 | 0.0223 | -0.411385 | 0.0670 |
| 10735959 | Slc43a2    | 0.062498  | 0.9999 | -0.854927 | 0.0003 | -0.866961 | 0.0001 | -0.802864 | 0.0002 |
| 10735986 | Inpp5k     | 0.264621  | 0.8971 | 0.229916  | 0.5377 | 0.446984  | 0.0420 | 0.487436  | 0.0244 |
| 10736057 | RGD1307493 | -0.140568 | 0.9620 | -0.346590 | 0.0562 | -0.416649 | 0.0069 | -0.385444 | 0.0117 |
| 10736195 | Supt6h     | 0.115966  | 0.9921 | 0.242078  | 0.3361 | 0.417717  | 0.0155 | 0.404232  | 0.0186 |
| 10736257 | Traf4      | 0.006364  | 0.9999 | 0.277348  | 0.3877 | 0.463467  | 0.0297 | 0.400796  | 0.0681 |
| 10736267 | Slc46a1    | 0.116297  | 0.9631 | 0.336342  | 0.0316 | 0.457527  | 0.0008 | 0.358600  | 0.0079 |
| 10736337 | Nf1        | 0.288415  | 0.8614 | 0.419204  | 0.1000 | 0.573221  | 0.0057 | 0.425020  | 0.0462 |
| 10736420 | Taok1      | 0.128894  | 0.9630 | 0.256198  | 0.2026 | 0.402248  | 0.0077 | 0.462582  | 0.0017 |
| 10736486 | Cpd        | 0.136003  | 0.9624 | 0.321929  | 0.0876 | 0.296473  | 0.0654 | 0.402249  | 0.0087 |
| 10736545 | Nxn        | 0.018678  | 0.9999 | -0.106002 | 0.7907 | -0.369233 | 0.0341 | -0.291926 | 0.1144 |
| 10736784 | Slfn5      | 0.506811  | 0.8570 | -0.806311 | 0.0497 | -1.000453 | 0.0044 | -1.095986 | 0.0014 |
| 10736795 | Slfn2      | -0.010837 | 0.9999 | -0.567882 | 0.2849 | -0.848992 | 0.0261 | -0.650816 | 0.1076 |
| 10736852 | Taf15      | 0.103997  | 0.9921 | 0.194472  | 0.4232 | 0.374828  | 0.0157 | 0.370812  | 0.0162 |
| 10737194 | ---        | -0.153588 | 0.9999 | -0.495523 | 0.4308 | -0.984420 | 0.0136 | -1.171867 | 0.0025 |
| 10737201 | ---        | -0.153588 | 0.9999 | -0.495523 | 0.4308 | -0.984420 | 0.0136 | -1.171867 | 0.0025 |
| 10737203 | ---        | -0.153588 | 0.9999 | -0.495523 | 0.4308 | -0.984420 | 0.0136 | -1.171867 | 0.0025 |
| 10737506 | Tob1       | 0.080585  | 0.9999 | 0.271194  | 0.4642 | 0.607265  | 0.0079 | 0.582420  | 0.0099 |
| 10737527 | Mrpl27     | -0.060587 | 0.9999 | -0.262107 | 0.1041 | -0.206180 | 0.1458 | -0.307980 | 0.0186 |
| 10737627 | Fam117a    | -0.088126 | 0.9990 | -0.553854 | 0.0036 | -0.374663 | 0.0371 | -0.454634 | 0.0091 |
| 10737663 | Gngt2      | -0.145738 | 0.9814 | -0.841236 | 0.0000 | -0.885628 | 0.0000 | -0.855289 | 0.0000 |
| 10737763 | Copz2      | 0.140606  | 0.9898 | -0.164448 | 0.6891 | -0.244836 | 0.3055 | -0.410319 | 0.0493 |
| 10737784 | Mrpl10     | -0.001893 | 0.9999 | -0.221159 | 0.1833 | -0.369699 | 0.0035 | -0.434264 | 0.0005 |
| 10737827 | Socs7      | -0.021925 | 0.9999 | 0.208181  | 0.4816 | 0.367332  | 0.0448 | 0.168048  | 0.4749 |
| 10737874 | Mllt6      | 0.088784  | 0.9999 | 0.393556  | 0.0992 | 0.617205  | 0.0015 | 0.705947  | 0.0003 |
| 10738071 | Msl1       | 0.172872  | 0.8945 | 0.219298  | 0.2600 | 0.347212  | 0.0130 | 0.247954  | 0.0964 |
| 10738118 | Cdc6       | -0.001117 | 0.9999 | -0.436042 | 0.4805 | -0.736984 | 0.0556 | -1.207532 | 0.0009 |
| 10738140 | Igfbp4     | 0.141995  | 0.9921 | -0.241176 | 0.4897 | -0.424207 | 0.0491 | -0.502784 | 0.0164 |
| 10738177 | Fkbp10     | 0.075560  | 0.9999 | -0.171485 | 0.6958 | -0.432949 | 0.0497 | -0.360486 | 0.1211 |
| 10738261 | RGD1564228 | 0.315716  | 0.7200 | -0.209020 | 0.3640 | -0.367586 | 0.0176 | -0.391823 | 0.0100 |
| 10738341 | Ramp2      | 0.156108  | 0.9985 | -0.478327 | 0.2461 | -0.735414 | 0.0144 | -0.741268 | 0.0126 |
| 10738391 | Aoc3       | 0.369457  | 0.8669 | -0.603234 | 0.0722 | -0.931761 | 0.0009 | -0.740968 | 0.0073 |
| 10738423 | Rnd2       | 0.227671  | 0.9277 | 0.484155  | 0.0463 | 0.546969  | 0.0088 | 0.660831  | 0.0012 |
| 10738451 | Tmem106a   | 0.047509  | 0.9999 | -0.414968 | 0.0091 | -0.655615 | 0.0000 | -0.522873 | 0.0003 |

|          |            |           |        |           |        |           |        |           |        |
|----------|------------|-----------|--------|-----------|--------|-----------|--------|-----------|--------|
| 10738469 | Rdm1       | -0.038668 | 0.9999 | -0.275978 | 0.3858 | -0.354172 | 0.1091 | -0.451914 | 0.0326 |
| 10738556 | Tmub2      | 0.190848  | 0.8619 | 0.201595  | 0.3279 | 0.211601  | 0.1723 | 0.353450  | 0.0116 |
| 10738576 | Grn        | 0.238957  | 0.8541 | -0.380614 | 0.0408 | -0.476401 | 0.0030 | -0.398397 | 0.0123 |
| 10738657 | Acbd4      | -0.092389 | 0.9921 | 0.044720  | 0.9192 | 0.269310  | 0.0921 | 0.325314  | 0.0350 |
| 10738676 | Fmn1l      | 0.073401  | 0.9999 | -0.230707 | 0.3105 | -0.410423 | 0.0094 | -0.363153 | 0.0219 |
| 10738705 | Magmas     | -0.018213 | 0.9999 | -0.121080 | 0.8309 | -0.603764 | 0.0084 | -0.415291 | 0.0871 |
| 10738744 | Mapt       | -0.048729 | 0.9999 | 0.769542  | 0.0000 | 0.505247  | 0.0023 | 0.555537  | 0.0006 |
| 10738972 | Mrc2       | 0.010588  | 0.9999 | -0.250310 | 0.7331 | -0.565911 | 0.1202 | -0.816248 | 0.0168 |
| 10739003 | Tanc2      | 0.145788  | 0.9990 | 0.950497  | 0.0022 | 1.033571  | 0.0004 | 0.943900  | 0.0009 |
| 10739035 | Ace        | 0.038079  | 0.9999 | -0.530158 | 0.2702 | -0.696133 | 0.0479 | -0.530786 | 0.1640 |
| 10739236 | Helz       | 0.126708  | 0.9889 | 0.300898  | 0.2215 | 0.383758  | 0.0391 | 0.265598  | 0.1986 |
| 10739395 | Rpl38      | -0.101337 | 0.9777 | -0.144100 | 0.5155 | -0.312727 | 0.0174 | -0.171223 | 0.2646 |
| 10739457 | Cd300a     | 0.197192  | 0.9220 | -0.338035 | 0.1230 | -0.416411 | 0.0183 | -0.353968 | 0.0497 |
| 10739541 | H3f3b      | 0.011277  | 0.9999 | -0.293477 | 0.2951 | -0.370817 | 0.0700 | -0.424537 | 0.0339 |
| 10739630 | Tsen54     | -0.267403 | 0.8614 | 0.188023  | 0.5911 | 0.277051  | 0.1967 | 0.394653  | 0.0460 |
| 10739642 | Llgl2      | 0.010815  | 0.9999 | 0.772328  | 0.0012 | 0.791322  | 0.0004 | 0.931248  | 0.0000 |
| 10739781 | RGD1311078 | -0.108241 | 0.9659 | -0.094187 | 0.7498 | -0.316769 | 0.0191 | -0.255544 | 0.0683 |
| 10739866 | Sec14l1    | 0.036197  | 0.9999 | 0.173225  | 0.3510 | 0.260756  | 0.0417 | 0.162714  | 0.2708 |
| 10739886 | 9-Sep      | 0.124970  | 0.9990 | -0.526886 | 0.0702 | -0.696994 | 0.0042 | -0.782611 | 0.0010 |
| 10739927 | C1qtnf1    | 0.306239  | 0.9010 | -0.345103 | 0.3649 | -0.569339 | 0.0275 | -0.425863 | 0.1229 |
| 10739958 | Rnf213     | 0.171161  | 0.9624 | -0.175672 | 0.6269 | -0.391241 | 0.0449 | -0.080747 | 0.7998 |
| 10740085 | Chmp6      | -0.012310 | 0.9999 | -0.130022 | 0.5748 | -0.206125 | 0.1377 | -0.318620 | 0.0127 |
| 10740185 | Anapc11    | -0.077627 | 0.9968 | -0.212877 | 0.2789 | -0.354722 | 0.0112 | -0.163706 | 0.3367 |
| 10740293 | Abcc1      | -0.117973 | 0.9999 | 0.164797  | 0.8097 | 0.424809  | 0.1746 | 0.691851  | 0.0149 |
| 10740413 | RGD1563163 | -0.106784 | 0.9999 | -0.308043 | 0.3687 | -0.528112 | 0.0220 | -0.447973 | 0.0582 |
| 10740416 | Clec16a    | -0.146076 | 0.9750 | 0.232986  | 0.4294 | 0.450717  | 0.0166 | 0.440996  | 0.0183 |
| 10740529 | Abat       | -0.185422 | 0.7905 | -0.254688 | 0.0458 | -0.189048 | 0.1015 | -0.031986 | 0.8739 |
| 10740558 | Rpl35a     | -0.002540 | 0.9999 | -0.062156 | 0.9093 | -0.440312 | 0.0240 | -0.293201 | 0.1732 |
| 10740560 | LOC687502  | 0.069414  | 0.9999 | -0.467559 | 0.3858 | -0.749199 | 0.0375 | -0.600423 | 0.1163 |
| 10740567 | A2bp1      | -0.170444 | 0.9921 | -0.626419 | 0.0324 | -0.819756 | 0.0013 | -0.913656 | 0.0003 |
| 10740815 | Znf213     | 0.097627  | 0.9653 | 0.131288  | 0.5070 | 0.158800  | 0.2330 | 0.242549  | 0.0436 |
| 10740891 | Paqr4      | 0.029753  | 0.9999 | -0.590320 | 0.0004 | -0.513351 | 0.0010 | -0.550505 | 0.0004 |
| 10740966 | Pdpk1      | -0.006677 | 0.9999 | 0.129483  | 0.7171 | 0.349112  | 0.0449 | 0.084768  | 0.7592 |
| 10740982 | Amdhd2     | 0.147886  | 0.9199 | -0.241326 | 0.1435 | -0.358736 | 0.0055 | -0.286853 | 0.0285 |
| 10741028 | Ccnf       | 0.059962  | 0.9999 | -0.853896 | 0.0885 | -1.037899 | 0.0120 | -1.381268 | 0.0006 |
| 10741463 | Chtf18     | 0.101920  | 0.9921 | -0.243620 | 0.2824 | -0.345644 | 0.0346 | -0.362205 | 0.0252 |
| 10741518 | Fam173a    | 0.204845  | 0.9170 | 0.347236  | 0.1195 | 0.456971  | 0.0108 | 0.526087  | 0.0025 |
| 10741802 | ---        | -0.278161 | 0.7200 | -0.157074 | 0.4828 | -0.366037 | 0.0067 | -0.335421 | 0.0123 |
| 10741831 | RGD1310862 | 0.068923  | 0.9999 | 0.367347  | 0.2077 | 0.525216  | 0.0168 | 0.476785  | 0.0311 |
| 10741865 | ---        | 0.176221  | 0.9998 | -1.058754 | 0.0092 | -1.299019 | 0.0005 | -1.446352 | 0.0001 |
| 10741868 | RGD1564984 | 0.013822  | 0.9999 | -0.505475 | 0.0525 | -0.651070 | 0.0034 | -0.736041 | 0.0007 |
| 10742104 | Gpbp1l1    | 0.109090  | 0.9959 | 0.304679  | 0.2600 | 0.491853  | 0.0114 | 0.360421  | 0.0775 |
| 10742128 | Hmmr       | -0.029044 | 0.9999 | -0.975833 | 0.1237 | -1.322278 | 0.0090 | -1.427633 | 0.0039 |
| 10742145 | Ceng1      | -0.100433 | 0.9949 | 0.230933  | 0.3854 | 0.377990  | 0.0332 | 0.446553  | 0.0097 |
| 10742194 | Pttg1      | 0.133930  | 0.9999 | -1.004323 | 0.0796 | -1.240537 | 0.0092 | -1.629101 | 0.0005 |
| 10742236 | Thg1l      | -0.125053 | 0.9921 | -0.388582 | 0.1102 | -0.326091 | 0.1193 | -0.471477 | 0.0163 |
| 10742254 | Cyfp2      | -0.178388 | 0.9664 | 0.810631  | 0.0006 | 0.988889  | 0.0000 | 0.689128  | 0.0014 |

|          |            |           |        |           |        |           |        |           |        |
|----------|------------|-----------|--------|-----------|--------|-----------|--------|-----------|--------|
| 10742352 | RGD1559575 | 0.231991  | 0.8669 | -0.445658 | 0.0239 | -0.521993 | 0.0028 | -0.373356 | 0.0359 |
| 10742575 | Hspa4      | -0.042070 | 0.9999 | 0.215263  | 0.2054 | 0.310370  | 0.0154 | 0.252697  | 0.0555 |
| 10742849 | ---        | -0.061834 | 0.9959 | -0.082041 | 0.7238 | -0.225914 | 0.0438 | 0.105476  | 0.4598 |
| 10742868 | LOC686661  | 0.179282  | 0.9917 | -0.916416 | 0.0010 | -0.782288 | 0.0028 | -1.015185 | 0.0001 |
| 10742913 | LOC691286  | -0.196732 | 0.7989 | -0.125283 | 0.5609 | -0.251831 | 0.0422 | -0.205732 | 0.1168 |
| 10742989 | Obscn      | -0.060962 | 0.9999 | 0.652139  | 0.0063 | 0.560417  | 0.0109 | 0.708261  | 0.0009 |
| 10743013 | Obscn      | 0.050582  | 0.9999 | 0.728834  | 0.0073 | 0.600804  | 0.0164 | 0.667401  | 0.0064 |
| 10743025 | Obscn      | 0.063184  | 0.9999 | 0.721221  | 0.0146 | 0.609979  | 0.0236 | 0.657148  | 0.0128 |
| 10743027 | Obscn      | -0.016649 | 0.9999 | 0.633313  | 0.0646 | 0.500406  | 0.1004 | 0.652573  | 0.0248 |
| 10743029 | Obscn      | 0.021239  | 0.9999 | 0.620463  | 0.0651 | 0.495590  | 0.0972 | 0.628849  | 0.0281 |
| 10743031 | Obscn      | 0.003069  | 0.9999 | 0.717358  | 0.0333 | 0.632426  | 0.0348 | 0.622758  | 0.0377 |
| 10743041 | Obscn      | 0.028813  | 0.9999 | 0.737789  | 0.0176 | 0.718327  | 0.0103 | 0.734667  | 0.0076 |
| 10743096 | ---        | 0.003533  | 0.9999 | 0.511540  | 0.0938 | 0.623287  | 0.0127 | 0.584740  | 0.0194 |
| 10743100 | Obscn      | 0.104843  | 0.9999 | 0.635524  | 0.0448 | 0.771472  | 0.0045 | 0.573911  | 0.0385 |
| 10743199 | Pemt       | -0.094163 | 0.9921 | -0.214623 | 0.3350 | -0.293899 | 0.0612 | -0.337573 | 0.0279 |
| 10743235 | Tom1l2     | -0.075452 | 0.9999 | 0.362581  | 0.1666 | 0.391177  | 0.0609 | 0.435226  | 0.0338 |
| 10743296 | Top3a      | 0.262890  | 0.8872 | 0.381919  | 0.1511 | 0.653826  | 0.0016 | 0.470413  | 0.0241 |
| 10743341 | ---        | -0.366226 | 0.8562 | 0.340471  | 0.3704 | 0.536109  | 0.0372 | 0.349683  | 0.2304 |
| 10743535 | Ncor1      | 0.118474  | 0.9843 | 0.217796  | 0.3650 | 0.388900  | 0.0160 | 0.334240  | 0.0421 |
| 10743652 | Myocd      | 0.012569  | 0.9999 | 0.557451  | 0.0331 | 0.642336  | 0.0048 | 0.740925  | 0.0009 |
| 10743723 | RGD1309906 | -0.054317 | 0.9999 | 0.126831  | 0.7738 | 0.296771  | 0.1584 | 0.434001  | 0.0257 |
| 10743774 | Ntn1       | 0.416932  | 0.8614 | -0.565564 | 0.1313 | -0.864928 | 0.0036 | -0.715053 | 0.0161 |
| 10743785 | Ndel1      | 0.000723  | 0.9999 | 0.222177  | 0.4238 | 0.406482  | 0.0231 | 0.281225  | 0.1488 |
| 10743825 | Pfas       | -0.037768 | 0.9999 | -0.344379 | 0.2472 | -0.322389 | 0.1739 | -0.463871 | 0.0343 |
| 10743966 | Kdm6b      | 0.101810  | 0.9999 | 0.272689  | 0.4899 | 0.263462  | 0.3594 | 0.520258  | 0.0306 |
| 10744127 | Cd68       | 0.635087  | 0.8161 | -1.766809 | 0.0000 | -2.302039 | 0.0000 | -2.184782 | 0.0000 |
| 10744143 | Senp3      | -0.029392 | 0.9999 | 0.170773  | 0.5099 | 0.354172  | 0.0224 | 0.232688  | 0.1752 |
| 10744161 | Tnfsf13    | 0.215278  | 0.7401 | -0.171928 | 0.3217 | -0.342742 | 0.0041 | -0.296534 | 0.0124 |
| 10744171 | Tnfsf12    | 0.071413  | 0.9999 | -0.283116 | 0.2981 | -0.372305 | 0.0584 | -0.445100 | 0.0198 |
| 10744324 | Slc2a4     | 0.016447  | 0.9999 | -0.441939 | 0.4012 | -0.714780 | 0.0402 | -0.841090 | 0.0129 |
| 10744370 | Slc16a13   | 0.061452  | 0.9999 | 0.227117  | 0.5904 | 0.326430  | 0.2099 | 0.545862  | 0.0187 |
| 10744385 | RGD1308134 | 0.005778  | 0.9999 | -0.410812 | 0.0140 | -0.531024 | 0.0004 | -0.479187 | 0.0011 |
| 10744597 | LOC691995  | -0.085969 | 0.9999 | -0.475200 | 0.4320 | -0.673000 | 0.0952 | -1.252699 | 0.0008 |
| 10744632 | Aip1l      | -0.280067 | 0.7200 | -0.318352 | 0.0413 | -0.307808 | 0.0239 | -0.109060 | 0.5573 |
| 10744751 | Cyb5d2     | -0.015091 | 0.9999 | 0.605941  | 0.0269 | 0.544352  | 0.0259 | 0.517681  | 0.0343 |
| 10744766 | Aspa       | -0.146700 | 0.8614 | -0.184913 | 0.1958 | -0.244341 | 0.0252 | -0.204905 | 0.0697 |
| 10744780 | Olr1470    | 0.024979  | 0.9999 | -0.004272 | 0.9910 | 0.067752  | 0.5873 | 0.222276  | 0.0140 |
| 10744939 | Serpinf1   | 0.006984  | 0.9999 | -0.401926 | 0.5262 | -1.133065 | 0.0022 | -0.874107 | 0.0182 |
| 10745081 | Pigs       | 0.020245  | 0.9999 | 0.172102  | 0.5861 | 0.158962  | 0.4810 | 0.374043  | 0.0342 |
| 10745107 | Spag5      | 0.049054  | 0.9999 | -0.740025 | 0.1874 | -0.801408 | 0.0702 | -1.167471 | 0.0053 |
| 10745222 | RGD1566149 | 0.071711  | 0.9977 | 0.325249  | 0.0369 | 0.287924  | 0.0367 | 0.326096  | 0.0156 |
| 10745292 | Lgals9     | -0.171940 | 0.9921 | -0.860738 | 0.0055 | -0.717485 | 0.0122 | -0.765420 | 0.0065 |
| 10745340 | ---        | 0.709807  | 0.0378 | -0.363132 | 0.1271 | -0.292755 | 0.1561 | -0.336381 | 0.0967 |
| 10745342 | Evi2a      | -0.007728 | 0.9999 | -0.490870 | 0.0001 | -0.569877 | 0.0000 | -0.430175 | 0.0002 |
| 10745345 | ---        | -0.063098 | 0.9999 | 0.394042  | 0.0458 | 0.420023  | 0.0132 | 0.476361  | 0.0040 |
| 10745509 | Myo1d      | -0.162739 | 0.9999 | 0.775340  | 0.0720 | 0.990805  | 0.0059 | 0.891514  | 0.0125 |
| 10745595 | Slfn8      | 0.248009  | 0.9653 | -0.682846 | 0.0525 | -0.669661 | 0.0282 | -0.824428 | 0.0051 |

|          |            |           |        |           |        |           |        |           |        |
|----------|------------|-----------|--------|-----------|--------|-----------|--------|-----------|--------|
| 10745791 | Usp32      | 0.008594  | 0.9999 | 0.413610  | 0.2202 | 0.579629  | 0.0219 | 0.577017  | 0.0215 |
| 10745850 | Brip1      | -0.008778 | 0.9999 | -0.345907 | 0.5053 | -0.544641 | 0.0930 | -0.692021 | 0.0257 |
| 10745897 | Med13      | 0.200323  | 0.9570 | 0.330013  | 0.2422 | 0.581735  | 0.0046 | 0.491095  | 0.0169 |
| 10746022 | Prr11      | 0.102107  | 0.9999 | -0.508742 | 0.1257 | -0.659217 | 0.0129 | -0.573687 | 0.0327 |
| 10746139 | Scpep1     | 0.211573  | 0.9460 | -0.374758 | 0.1575 | -0.550252 | 0.0074 | -0.614353 | 0.0022 |
| 10746158 | LOC497978  | 0.222210  | 0.9620 | 0.277354  | 0.4901 | 0.636627  | 0.0086 | 0.421604  | 0.1037 |
| 10746286 | Luc7l3     | 0.286206  | 0.9382 | 0.342404  | 0.4234 | 0.613011  | 0.0264 | 0.519023  | 0.0684 |
| 10746327 | Cacna1g    | 0.189050  | 0.9871 | 0.630708  | 0.0430 | 0.408978  | 0.1625 | 0.658445  | 0.0134 |
| 10746416 | Eme1       | 0.111697  | 0.9978 | -0.291480 | 0.3548 | -0.374016 | 0.0938 | -0.455883 | 0.0340 |
| 10746532 | ---        | -0.069333 | 0.9999 | -0.294141 | 0.3632 | -0.438336 | 0.0481 | -0.452986 | 0.0400 |
| 10746628 | Tbx21      | 0.088284  | 0.9830 | 0.210036  | 0.1774 | 0.175088  | 0.1830 | 0.301861  | 0.0105 |
| 10746654 | Kpnb1      | 0.042394  | 0.9999 | -0.225953 | 0.2721 | -0.215934 | 0.1816 | -0.366738 | 0.0115 |
| 10746745 | Pcgf2      | 0.189438  | 0.8562 | 0.244432  | 0.1417 | 0.326649  | 0.0125 | 0.337063  | 0.0091 |
| 10746854 | ---        | 0.235947  | 0.9136 | 0.367851  | 0.1670 | 0.300082  | 0.1856 | 0.605248  | 0.0025 |
| 10746856 | Fbxl20     | 0.232644  | 0.8614 | 0.305890  | 0.1621 | 0.490801  | 0.0037 | 0.338454  | 0.0534 |
| 10746916 | Ormdl3     | -0.054967 | 0.9999 | 0.239444  | 0.1238 | 0.285767  | 0.0231 | 0.376245  | 0.0019 |
| 10746952 | Rpl35a     | -0.041752 | 0.9999 | -0.089022 | 0.8825 | -0.476044 | 0.0352 | -0.371963 | 0.1227 |
| 10746955 | Nr1d1      | 0.107773  | 0.9921 | 0.288867  | 0.1958 | 0.343900  | 0.0464 | 0.416795  | 0.0125 |
| 10746976 | Top2a      | 0.169256  | 0.9999 | -1.036093 | 0.1936 | -1.080124 | 0.0878 | -2.076483 | 0.0005 |
| 10747313 | Hap1       | -0.020298 | 0.9999 | 0.277386  | 0.2873 | 0.364042  | 0.0550 | 0.424730  | 0.0216 |
| 10747537 | Aarsd1     | -0.093992 | 0.9921 | -0.202368 | 0.3743 | -0.179963 | 0.3122 | -0.308499 | 0.0465 |
| 10747575 | Plekhh3    | 0.052359  | 0.9999 | 0.304580  | 0.2218 | 0.264157  | 0.1998 | 0.404296  | 0.0305 |
| 10747640 | Brca1      | -0.011419 | 0.9999 | -0.159960 | 0.6617 | -0.342907 | 0.0780 | -0.443992 | 0.0170 |
| 10747891 | LOC685233  | 0.224330  | 0.9659 | 0.519389  | 0.1382 | 0.518369  | 0.0708 | 0.611014  | 0.0286 |
| 10747893 | LOC685233  | 0.134277  | 0.9921 | 0.440937  | 0.0981 | 0.666485  | 0.0022 | 0.594108  | 0.0054 |
| 10747959 | Kif18b     | -0.064481 | 0.9999 | -0.539575 | 0.0613 | -0.623897 | 0.0107 | -0.765043 | 0.0013 |
| 10748061 | Plekhl1    | 0.136392  | 0.9544 | 0.222399  | 0.2344 | 0.401748  | 0.0034 | 0.312356  | 0.0236 |
| 10748253 | Smardc2    | 0.262338  | 0.8345 | -0.352803 | 0.0845 | -0.335456 | 0.0543 | -0.426553 | 0.0108 |
| 10748361 | Smurf2     | -0.020120 | 0.9999 | 0.337895  | 0.2254 | 0.508865  | 0.0135 | 0.320475  | 0.1603 |
| 10748396 | Falz       | 0.156467  | 0.9310 | 0.243364  | 0.2115 | 0.303435  | 0.0411 | 0.191599  | 0.2617 |
| 10748857 | RGD1561778 | -0.081475 | 0.9999 | -0.521573 | 0.0492 | -0.347520 | 0.1605 | -0.380771 | 0.1216 |
| 10748861 | ---        | -0.059959 | 0.9999 | -1.397683 | 0.0000 | -1.346812 | 0.0000 | -1.443827 | 0.0000 |
| 10748870 | Cd300lf    | 0.234195  | 0.7989 | -0.567312 | 0.0002 | -0.656276 | 0.0000 | -0.615528 | 0.0000 |
| 10748909 | Fdxr       | -0.061200 | 0.9956 | -0.109683 | 0.5706 | -0.256860 | 0.0182 | 0.006411  | 0.9805 |
| 10748935 | RGD1311422 | -0.166798 | 0.9456 | 0.409745  | 0.0253 | 0.335767  | 0.0427 | 0.384139  | 0.0178 |
| 10748973 | Gga3       | -0.094279 | 0.9998 | 0.197420  | 0.5766 | 0.313529  | 0.1383 | 0.520317  | 0.0071 |
| 10748999 | Slc25a19   | -0.086611 | 0.9999 | 0.189644  | 0.6730 | 0.579508  | 0.0104 | 0.368041  | 0.1362 |
| 10749058 | Rps18      | -0.093007 | 0.9999 | -0.290682 | 0.4695 | -0.633458 | 0.0102 | -0.525551 | 0.0356 |
| 10749287 | Ube2o      | 0.064878  | 0.9999 | 0.339050  | 0.4042 | 0.597261  | 0.0248 | 0.471327  | 0.0916 |
| 10749330 | St6galnac2 | -0.004411 | 0.9999 | -1.047133 | 0.0011 | -1.059221 | 0.0004 | -0.988211 | 0.0008 |
| 10749484 | Timp2      | 0.196727  | 0.9620 | -0.410803 | 0.1097 | -0.666758 | 0.0013 | -0.455742 | 0.0301 |
| 10749495 | Lgals3bp   | 0.087782  | 0.9999 | -0.261281 | 0.5202 | -0.529744 | 0.0289 | -0.337372 | 0.2182 |
| 10749648 | Mafg       | -0.047868 | 0.9999 | 0.098321  | 0.8615 | 0.446731  | 0.0433 | 0.148068  | 0.6406 |
| 10749656 | Fam195b    | 0.084071  | 0.9977 | -0.195720 | 0.4247 | -0.376101 | 0.0165 | -0.339438 | 0.0316 |
| 10749822 | Cggbp1     | 0.089546  | 0.9921 | 0.130928  | 0.6435 | 0.339566  | 0.0215 | 0.099562  | 0.6433 |
| 10749983 | Cxadr      | 0.137430  | 0.9977 | 0.346774  | 0.3752 | 0.733221  | 0.0046 | 0.653110  | 0.0108 |
| 10750055 | Usp16      | 0.060191  | 0.9999 | 0.434664  | 0.2196 | 0.596167  | 0.0250 | 0.506248  | 0.0642 |

|          |            |           |        |           |        |           |        |           |        |
|----------|------------|-----------|--------|-----------|--------|-----------|--------|-----------|--------|
| 10750193 | Il10rb     | 0.090506  | 0.9990 | -0.135638 | 0.7176 | -0.391368 | 0.0312 | -0.203511 | 0.3548 |
| 10750219 | Son        | 0.198183  | 0.9277 | 0.177950  | 0.5904 | 0.476885  | 0.0088 | 0.181340  | 0.4388 |
| 10750277 | ---        | -0.081402 | 0.9999 | 0.175557  | 0.6850 | 0.473057  | 0.0297 | 0.340168  | 0.1501 |
| 10750282 | Slc5a3     | 0.136755  | 0.9999 | 0.488972  | 0.5648 | 1.426409  | 0.0028 | 1.002137  | 0.0394 |
| 10750452 | ---        | 0.082902  | 0.9999 | -0.167754 | 0.7339 | -0.509044 | 0.0290 | -0.495992 | 0.0332 |
| 10750505 | Pcp4       | 0.117440  | 0.9998 | 0.433344  | 0.1639 | 0.233366  | 0.4445 | 0.518069  | 0.0339 |
| 10750513 | Bace2      | 0.122398  | 0.9942 | 0.300247  | 0.3260 | -0.146177 | 0.6197 | -0.466433 | 0.0281 |
| 10750649 | Olr1560    | 0.161278  | 0.7668 | 0.111053  | 0.4591 | 0.121730  | 0.2527 | 0.206775  | 0.0274 |
| 10750672 | St3gal6    | -0.034712 | 0.9999 | 0.168997  | 0.8313 | 0.710525  | 0.0290 | 0.579236  | 0.0888 |
| 10750685 | Col8a1     | -0.089527 | 0.9999 | 0.097486  | 0.9342 | -0.433133 | 0.3448 | -1.086466 | 0.0036 |
| 10750688 | RGD1309437 | 0.084577  | 0.9999 | -0.595275 | 0.0138 | -0.555215 | 0.0109 | -0.630753 | 0.0030 |
| 10750711 | Tbc1d23    | 0.000259  | 0.9999 | 0.648104  | 0.0074 | 0.695950  | 0.0017 | 0.920280  | 0.0000 |
| 10750848 | Nfkbiz     | -0.238974 | 0.9921 | 0.583906  | 0.2196 | 0.670793  | 0.0664 | 0.752812  | 0.0358 |
| 10750876 | Hmgb2      | 0.120501  | 0.9999 | -0.904999 | 0.0176 | -1.131390 | 0.0010 | -1.445386 | 0.0000 |
| 10750966 | Ptgis      | -0.131242 | 0.9921 | 0.387050  | 0.1200 | 0.568521  | 0.0043 | 0.340287  | 0.1142 |
| 10751018 | Abhd10     | 0.025810  | 0.9999 | 0.445539  | 0.2600 | 0.644833  | 0.0250 | 0.566275  | 0.0539 |
| 10751239 | Upk1b      | -0.227798 | 0.8614 | -1.007133 | 0.0000 | -1.008992 | 0.0000 | -0.772846 | 0.0000 |
| 10751289 | Adprh      | 0.046544  | 0.9999 | -0.117572 | 0.6124 | -0.313470 | 0.0122 | -0.150547 | 0.3178 |
| 10751448 | Ranbp1     | -0.022704 | 0.9999 | -0.156605 | 0.5689 | -0.159466 | 0.4021 | -0.334230 | 0.0317 |
| 10751593 | Itgb5      | -0.350517 | 0.8614 | 0.456231  | 0.1675 | 0.419242  | 0.1233 | 0.734320  | 0.0031 |
| 10751659 | Lrrc33     | 0.114450  | 0.9921 | -0.297083 | 0.2102 | -0.391376 | 0.0296 | -0.375729 | 0.0373 |
| 10751664 | Pigx       | 0.080326  | 0.9999 | 0.324193  | 0.1984 | 0.399473  | 0.0391 | 0.265309  | 0.2248 |
| 10751903 | Leprel1    | -0.485188 | 0.9632 | 1.620180  | 0.0102 | 1.773939  | 0.0020 | 1.998936  | 0.0004 |
| 10751931 | Bcl6       | 0.120312  | 0.9999 | 0.701995  | 0.1083 | 0.876697  | 0.0132 | 0.936304  | 0.0071 |
| 10752050 | Tra2b      | 0.032613  | 0.9999 | -0.266258 | 0.2840 | -0.225950 | 0.2674 | -0.379234 | 0.0339 |
| 10752098 | LOC499782  | -0.019500 | 0.9999 | -0.235497 | 0.2584 | -0.410983 | 0.0060 | -0.380670 | 0.0101 |
| 10752148 | Abcc5      | 0.261584  | 0.9593 | 0.194947  | 0.7444 | 0.644873  | 0.0197 | 0.365609  | 0.2538 |
| 10752253 | ---        | -0.175130 | 0.8063 | -0.252631 | 0.0497 | -0.224139 | 0.0473 | -0.218753 | 0.0547 |
| 10752303 | Comt       | 0.115137  | 0.9661 | -0.404067 | 0.0102 | -0.492981 | 0.0006 | -0.504160 | 0.0004 |
| 10752320 | Dgcr8      | 0.096650  | 0.9990 | 0.390081  | 0.1004 | 0.515616  | 0.0077 | 0.338204  | 0.1022 |
| 10752334 | Ranbp1     | -0.147453 | 0.9624 | -0.267914 | 0.2375 | -0.269840 | 0.1295 | -0.375643 | 0.0247 |
| 10752517 | Ube2l3     | -0.021444 | 0.9999 | 0.132833  | 0.4148 | 0.205500  | 0.0562 | 0.215123  | 0.0448 |
| 10752576 | Pkp2       | -0.243359 | 0.7566 | 0.405057  | 0.0074 | 0.307970  | 0.0286 | 0.472530  | 0.0005 |
| 10752603 | Mcm4       | 0.073413  | 0.9999 | -0.177504 | 0.7406 | -0.353726 | 0.1998 | -0.602065 | 0.0144 |
| 10752695 | Robo2      | -0.144480 | 0.9819 | -0.321883 | 0.2130 | -0.505826 | 0.0087 | -0.554069 | 0.0032 |
| 10752758 | Btg3       | -0.309823 | 0.9223 | 0.495761  | 0.1675 | 0.736787  | 0.0078 | 0.625483  | 0.0249 |
| 10752852 | Adamts5    | 0.421163  | 0.8743 | -2.670754 | 0.0000 | -2.780596 | 0.0000 | -3.018477 | 0.0000 |
| 10752865 | Rnf160     | 0.133735  | 0.9921 | 0.209014  | 0.5853 | 0.446462  | 0.0379 | 0.201205  | 0.4663 |
| 10752943 | Cldn8      | -0.129180 | 0.7200 | -0.087985 | 0.3150 | -0.136009 | 0.0270 | -0.056038 | 0.4843 |
| 10753075 | Synj1      | -0.019521 | 0.9999 | 0.316094  | 0.3594 | 0.495541  | 0.0351 | 0.297796  | 0.2756 |
| 10753109 | ---        | 0.224582  | 0.9653 | 0.362304  | 0.3829 | 0.615644  | 0.0260 | 0.602879  | 0.0288 |
| 10753129 | RGD1562726 | -0.007908 | 0.9999 | 0.903033  | 0.0006 | 0.962954  | 0.0001 | 0.622487  | 0.0107 |
| 10753214 | Rcan1      | -0.545099 | 0.8614 | 0.603020  | 0.2651 | 0.800747  | 0.0432 | 0.866187  | 0.0266 |
| 10753222 | Runx1      | -0.245440 | 0.9620 | 0.758806  | 0.0091 | 0.571875  | 0.0340 | 0.599794  | 0.0246 |
| 10753247 | Hlcs       | 0.155794  | 0.9917 | 0.424774  | 0.1415 | 0.541804  | 0.0179 | 0.554916  | 0.0140 |
| 10753300 | Brwd1      | 0.176223  | 0.9659 | 0.354538  | 0.2307 | 0.576838  | 0.0080 | 0.508808  | 0.0193 |
| 10753470 | Prdm15     | 0.004347  | 0.9999 | 0.278831  | 0.2218 | 0.343729  | 0.0474 | 0.207783  | 0.3044 |

|          |            |           |        |           |        |           |        |           |        |
|----------|------------|-----------|--------|-----------|--------|-----------|--------|-----------|--------|
| 10753559 | Olr1542    | -0.349223 | 0.4739 | -0.351131 | 0.0433 | -0.276274 | 0.0763 | -0.224936 | 0.1796 |
| 10753574 | Cpox       | -0.046317 | 0.9999 | 0.250119  | 0.2895 | 0.464470  | 0.0053 | 0.355615  | 0.0361 |
| 10753604 | RGD1565927 | -0.163321 | 0.9870 | 0.447095  | 0.1219 | 0.503959  | 0.0320 | 0.476855  | 0.0443 |
| 10753720 | Zbtb11     | 0.079298  | 0.9999 | 0.230621  | 0.6383 | 0.562346  | 0.0296 | 0.179485  | 0.6271 |
| 10753771 | Cd47       | 0.214975  | 0.8614 | -0.317140 | 0.1061 | -0.333548 | 0.0402 | -0.275476 | 0.1070 |
| 10753839 | RGD1310335 | -0.014830 | 0.9999 | -0.655820 | 0.2666 | -0.879804 | 0.0414 | -1.153169 | 0.0054 |
| 10753913 | ---        | 0.004492  | 0.9999 | -0.173108 | 0.1291 | -0.118242 | 0.2574 | -0.210739 | 0.0205 |
| 10753982 | Ccdc80     | 0.367564  | 0.9624 | -0.506747 | 0.4328 | -1.034300 | 0.0115 | -1.230397 | 0.0020 |
| 10754000 | Cd200r1    | 0.294703  | 0.9525 | -0.799857 | 0.0140 | -1.070115 | 0.0003 | -1.137453 | 0.0001 |
| 10754116 | Zbtb20     | 0.220831  | 0.9310 | 0.317364  | 0.2777 | 0.440113  | 0.0376 | 0.456351  | 0.0300 |
| 10754156 | B4galt4    | 0.021049  | 0.9999 | -0.307987 | 0.0287 | -0.324775 | 0.0087 | -0.218779 | 0.0978 |
| 10754188 | Gsk3b      | 0.075585  | 0.9999 | 0.309894  | 0.1538 | 0.412027  | 0.0151 | 0.455084  | 0.0060 |
| 10754296 | Hcls1      | 0.444181  | 0.8045 | -0.494579 | 0.1708 | -0.709974 | 0.0107 | -0.461052 | 0.1268 |
| 10754311 | Golgb1     | 0.231131  | 0.8614 | 0.257480  | 0.2773 | 0.353164  | 0.0402 | 0.300357  | 0.0944 |
| 10754384 | Cd86       | 0.127360  | 0.9631 | -0.288334 | 0.1247 | -0.310327 | 0.0428 | -0.300445 | 0.0524 |
| 10754510 | Mylk       | 0.046914  | 0.9999 | -0.300047 | 0.3337 | -0.385792 | 0.0828 | -0.496528 | 0.0193 |
| 10754563 | Itgb5      | -0.140792 | 0.9851 | 0.490027  | 0.0237 | 0.773850  | 0.0001 | 0.726017  | 0.0002 |
| 10754694 | Rpl35a     | -0.023435 | 0.9999 | -0.076991 | 0.8835 | -0.461158 | 0.0182 | -0.373670 | 0.0640 |
| 10754831 | Tm4sf19    | 0.382007  | 0.8614 | -1.368718 | 0.0000 | -1.403040 | 0.0000 | -1.400460 | 0.0000 |
| 10754871 | Pigz       | 0.007809  | 0.9999 | -0.283465 | 0.3198 | -0.298796 | 0.1641 | -0.405537 | 0.0443 |
| 10755013 | Il1rap     | -0.548862 | 0.8437 | 1.076762  | 0.0068 | 1.165492  | 0.0014 | 0.735738  | 0.0506 |
| 10755035 | Tp63       | -0.127081 | 0.9303 | -0.150193 | 0.4110 | -0.238981 | 0.0478 | -0.198413 | 0.1194 |
| 10755094 | St6gal1    | -0.215099 | 0.9507 | 0.550769  | 0.0198 | 0.560300  | 0.0081 | 0.544072  | 0.0092 |
| 10755171 | Dnajb11    | -0.059832 | 0.9999 | 0.433222  | 0.0448 | 0.255952  | 0.2207 | 0.337025  | 0.0862 |
| 10755533 | Klhl24     | 0.221510  | 0.9425 | 0.486838  | 0.0503 | 0.334211  | 0.1472 | 0.466172  | 0.0305 |
| 10755580 | Arvcf      | 0.067473  | 0.9999 | 0.336363  | 0.1926 | 0.489442  | 0.0122 | 0.409342  | 0.0399 |
| 10755751 | Crkl       | 0.035592  | 0.9999 | 0.066924  | 0.8816 | 0.345668  | 0.0408 | 0.178696  | 0.3871 |
| 10755992 | Cdc45l     | -0.027667 | 0.9999 | -0.324731 | 0.5075 | -0.630130 | 0.0328 | -0.948351 | 0.0008 |
| 10756011 | Hira       | -0.033892 | 0.9999 | 0.138137  | 0.6453 | 0.417420  | 0.0069 | 0.246016  | 0.1489 |
| 10756161 | Cd209a     | -0.074286 | 0.9805 | -0.160645 | 0.2170 | -0.011209 | 0.9533 | -0.197851 | 0.0463 |
| 10756229 | Insr       | 0.067294  | 0.9999 | 0.485167  | 0.0529 | 0.625464  | 0.0034 | 0.649205  | 0.0018 |
| 10756289 | Stard13    | 0.023063  | 0.9999 | 0.743458  | 0.0031 | 0.851985  | 0.0003 | 0.699000  | 0.0021 |
| 10756317 | RGD1566141 | 0.039830  | 0.9999 | 0.223833  | 0.4829 | 0.478482  | 0.0131 | 0.496646  | 0.0091 |
| 10756487 | Cdx2       | -0.183668 | 0.7989 | -0.089269 | 0.6915 | -0.262490 | 0.0188 | -0.092872 | 0.5390 |
| 10756500 | Usp12      | 0.058514  | 0.9999 | 0.264585  | 0.3304 | 0.442026  | 0.0185 | 0.275823  | 0.1889 |
| 10756510 | Usp12      | 0.037960  | 0.9999 | 0.260375  | 0.4368 | 0.443060  | 0.0404 | 0.272201  | 0.2772 |
| 10756528 | ---        | 0.017750  | 0.9999 | -0.169557 | 0.1265 | -0.121496 | 0.2236 | -0.205972 | 0.0200 |
| 10756622 | Baiap211   | 0.139719  | 0.9921 | 0.661661  | 0.0058 | 0.906016  | 0.0001 | 0.899010  | 0.0001 |
| 10756853 | Radil      | -0.039438 | 0.9999 | 0.293808  | 0.0708 | 0.233659  | 0.1042 | 0.370010  | 0.0056 |
| 10756875 | ---        | -0.170413 | 0.9668 | -0.522735 | 0.0313 | -0.492639 | 0.0217 | -0.528556 | 0.0120 |
| 10757119 | Prkar1b    | -0.000756 | 0.9999 | 0.268134  | 0.1307 | 0.274102  | 0.0596 | 0.360991  | 0.0097 |
| 10757258 | RGD1309735 | -0.103535 | 0.9867 | -0.213013 | 0.2991 | -0.452987 | 0.0016 | -0.344758 | 0.0163 |
| 10757438 | RGD1566006 | -0.130377 | 0.9544 | -0.343000 | 0.0203 | -0.304837 | 0.0227 | -0.172581 | 0.2679 |
| 10757615 | Tmem120a   | -0.078639 | 0.9999 | -0.433146 | 0.0316 | -0.322393 | 0.0807 | -0.502127 | 0.0035 |
| 10757726 | Eln        | 0.783908  | 0.7312 | -0.676660 | 0.2319 | -1.123114 | 0.0069 | -1.728498 | 0.0000 |
| 10757810 | Clip2      | -0.025431 | 0.9999 | -0.186928 | 0.6770 | -0.277364 | 0.2907 | -0.481676 | 0.0343 |
| 10757829 | Gtf2ird1   | 0.117116  | 0.9921 | 0.306592  | 0.2202 | 0.436509  | 0.0196 | 0.243879  | 0.2624 |



|          |            |           |        |           |        |           |        |           |        |
|----------|------------|-----------|--------|-----------|--------|-----------|--------|-----------|--------|
| 10757912 | Wbscr16    | -0.100038 | 0.9852 | -0.210955 | 0.2733 | -0.235283 | 0.1047 | -0.306189 | 0.0271 |
| 10757940 | Wbscr17    | 0.165273  | 0.9619 | -0.006132 | 0.9942 | -0.248566 | 0.2008 | -0.449840 | 0.0088 |
| 10757986 | Gusb       | 0.162973  | 0.9553 | -0.551576 | 0.0020 | -0.685003 | 0.0001 | -0.696873 | 0.0000 |
| 10758031 | ---        | -0.284622 | 0.9999 | -0.675772 | 0.5984 | -1.546850 | 0.0295 | -1.344639 | 0.0654 |
| 10758106 | Dhx37      | 0.055086  | 0.9999 | 0.338733  | 0.1984 | 0.419639  | 0.0379 | 0.124379  | 0.6799 |
| 10758156 | Ncor2      | 0.141250  | 0.9925 | 0.522092  | 0.0607 | 0.564443  | 0.0173 | 0.712205  | 0.0019 |
| 10758208 | Ccdc92     | -0.035197 | 0.9999 | 0.143239  | 0.7248 | 0.390085  | 0.0476 | 0.273885  | 0.2121 |
| 10758237 | Sbno1      | -0.002778 | 0.9999 | 0.154981  | 0.6542 | 0.429532  | 0.0159 | 0.310926  | 0.1014 |
| 10758383 | Clip1      | 0.073228  | 0.9999 | 0.591949  | 0.0131 | 0.637400  | 0.0030 | 0.613618  | 0.0035 |
| 10758517 | Camkk2     | -0.102031 | 0.9999 | -0.376912 | 0.2035 | -0.431872 | 0.0600 | -0.492822 | 0.0284 |
| 10758599 | RGD1566266 | -0.115806 | 0.9942 | 0.192700  | 0.5977 | 0.445358  | 0.0277 | -0.106964 | 0.7376 |
| 10758697 | Adam1a     | 0.162238  | 0.9525 | 0.174935  | 0.5249 | 0.330555  | 0.0448 | 0.218039  | 0.2436 |
| 10759173 | Selplg     | 0.129577  | 0.9921 | -0.365381 | 0.1693 | -0.451613 | 0.0296 | -0.363293 | 0.0962 |
| 10759198 | Cmklr1     | 0.144448  | 0.9999 | 0.060384  | 0.9622 | -0.471590 | 0.2350 | -0.862144 | 0.0129 |
| 10759227 | RGD1306556 | 0.103536  | 0.9999 | 0.514155  | 0.1041 | 0.532576  | 0.0425 | 0.488458  | 0.0695 |
| 10759358 | Fbrsl1     | 0.208736  | 0.9277 | 0.259407  | 0.3659 | 0.262790  | 0.2244 | 0.403338  | 0.0389 |
| 10759511 | Pabpc4     | 0.019357  | 0.9999 | -0.225840 | 0.4253 | -0.224083 | 0.2871 | -0.373071 | 0.0433 |
| 10759616 | Stxbp2     | 0.036652  | 0.9999 | -0.138943 | 0.5908 | -0.296575 | 0.0412 | -0.289077 | 0.0481 |
| 10759636 | ---        | -0.172785 | 0.9444 | -0.136301 | 0.6862 | -0.517200 | 0.0020 | -0.300402 | 0.0905 |
| 10759662 | Pnpla6     | 0.065201  | 0.9999 | 0.517344  | 0.0197 | 0.694159  | 0.0005 | 0.668986  | 0.0006 |
| 10759729 | Arhgef18   | 0.135217  | 0.9882 | 0.316284  | 0.2298 | 0.573917  | 0.0030 | 0.384187  | 0.0552 |
| 10759762 | Kl         | 0.038595  | 0.9999 | 0.154694  | 0.4074 | 0.277579  | 0.0228 | 0.168643  | 0.2238 |
| 10759805 | Brca2      | -0.058217 | 0.9999 | -0.239829 | 0.4096 | -0.396860 | 0.0379 | -0.276057 | 0.1926 |
| 10759852 | Fry        | 0.081439  | 0.9999 | 0.633992  | 0.0562 | 0.852275  | 0.0025 | 0.897377  | 0.0011 |
| 10759941 | B3galtl    | 0.040824  | 0.9999 | -0.300581 | 0.3426 | -0.419126 | 0.0584 | -0.696666 | 0.0009 |
| 10759957 | ---        | 0.101494  | 0.9624 | 0.151535  | 0.4004 | 0.264727  | 0.0252 | 0.269799  | 0.0212 |
| 10759989 | RGD1307396 | 0.484754  | 0.8614 | -0.680999 | 0.1048 | -0.932818 | 0.0061 | -0.991143 | 0.0028 |
| 10759999 | Alox5ap    | 0.306475  | 0.8614 | -0.382473 | 0.1978 | -0.425850 | 0.0658 | -0.547299 | 0.0138 |
| 10760018 | Rpl35a     | -0.012803 | 0.9999 | -0.084148 | 0.8824 | -0.471146 | 0.0269 | -0.308804 | 0.1926 |
| 10760047 | Pan3       | 0.046236  | 0.9999 | 0.161758  | 0.6383 | 0.400549  | 0.0273 | 0.181506  | 0.4278 |
| 10760196 | Arpc1b     | 0.139090  | 0.9921 | -0.281337 | 0.3897 | -0.358827 | 0.1144 | -0.439747 | 0.0449 |
| 10760212 | Ttrap      | 0.111368  | 0.9950 | 0.265411  | 0.3627 | 0.437075  | 0.0270 | 0.393396  | 0.0499 |
| 10760379 | Cyth3      | -0.265451 | 0.9624 | -0.829697 | 0.0130 | -0.807471 | 0.0073 | -1.455678 | 0.0000 |
| 10760397 | Kdelr2     | 0.007437  | 0.9999 | -0.132660 | 0.5316 | -0.225533 | 0.0799 | -0.350743 | 0.0035 |
| 10760403 | Daglb      | 0.052644  | 0.9999 | -0.186737 | 0.3544 | -0.115975 | 0.5180 | -0.344203 | 0.0103 |
| 10760468 | Wipi2      | 0.103746  | 0.9632 | 0.236366  | 0.1239 | 0.434199  | 0.0004 | 0.350569  | 0.0034 |
| 10760646 | Mafk       | -0.459170 | 0.7409 | 0.586761  | 0.0530 | 0.783546  | 0.0024 | 0.677458  | 0.0079 |
| 10760738 | Fam20c     | 0.084705  | 0.9999 | -0.558502 | 0.0230 | -0.732582 | 0.0008 | -0.925420 | 0.0000 |
| 10760762 | ---        | -0.005593 | 0.9999 | 0.119583  | 0.5539 | 0.015688  | 0.9435 | 0.254667  | 0.0277 |
| 10760824 | Mcm7       | 0.042741  | 0.9999 | -0.150196 | 0.8209 | -0.408957 | 0.1660 | -0.672894 | 0.0120 |
| 10761013 | RGD1310964 | -0.090839 | 0.9999 | 0.233745  | 0.4724 | 0.158072  | 0.5558 | 0.407857  | 0.0458 |
| 10761033 | RGD1566006 | 0.037558  | 0.9999 | -0.257091 | 0.3065 | -0.357815 | 0.0464 | -0.218466 | 0.2957 |
| 10761047 | Serpine1   | -0.623994 | 0.8210 | 1.151661  | 0.0083 | 1.274844  | 0.0014 | 1.216024  | 0.0017 |
| 10761180 | Rhbdd2     | -0.229356 | 0.8210 | -0.319771 | 0.0651 | -0.313757 | 0.0349 | -0.358251 | 0.0136 |
| 10761209 | Baz1b      | 0.166476  | 0.9582 | 0.296655  | 0.1901 | 0.438682  | 0.0107 | 0.286099  | 0.1246 |
| 10761227 | Stx1a      | -0.016880 | 0.9999 | 0.056887  | 0.8748 | 0.296048  | 0.0316 | 0.229494  | 0.1172 |
| 10761247 | Wbscr27    | 0.124517  | 0.9921 | -0.294420 | 0.2544 | -0.545207 | 0.0034 | -0.439446 | 0.0182 |

|          |            |           |        |           |        |           |        |           |        |
|----------|------------|-----------|--------|-----------|--------|-----------|--------|-----------|--------|
| 10761299 | Auts2      | 0.509062  | 0.6537 | 0.377549  | 0.2284 | 0.487388  | 0.0382 | 0.753090  | 0.0008 |
| 10761350 | Tpst1      | 0.227117  | 0.8973 | -0.200097 | 0.5278 | -0.333920 | 0.0849 | -0.406815 | 0.0295 |
| 10761380 | RGD1560258 | 0.062874  | 0.9998 | 0.071992  | 0.8250 | 0.222916  | 0.1122 | 0.271412  | 0.0456 |
| 10761463 | Ran        | -0.117583 | 0.9624 | -0.144790 | 0.5299 | -0.164416 | 0.2951 | -0.276214 | 0.0444 |
| 10761758 | Hip1r      | -0.108235 | 0.9968 | 0.359858  | 0.1445 | 0.512331  | 0.0082 | 0.485233  | 0.0114 |
| 10761810 | Kntc1      | 0.142803  | 0.9999 | -0.570104 | 0.1567 | -0.545188 | 0.0976 | -0.922591 | 0.0024 |
| 10761978 | P2rx4      | 0.062376  | 0.9999 | -0.523977 | 0.0241 | -0.528956 | 0.0104 | -0.580096 | 0.0039 |
| 10762051 | RGD1310788 | 0.467063  | 0.7607 | -0.844215 | 0.0034 | -0.949486 | 0.0004 | -1.064600 | 0.0001 |
| 10762115 | Naa25      | -0.055692 | 0.9999 | 0.279000  | 0.4724 | 0.529508  | 0.0280 | 0.191856  | 0.5584 |
| 10762142 | RGD1309762 | 0.273611  | 0.8562 | 0.385800  | 0.0891 | 0.586639  | 0.0017 | 0.536741  | 0.0032 |
| 10762304 | Slc24a6    | 0.246098  | 0.8973 | -0.758900 | 0.0004 | -0.639363 | 0.0014 | -0.756081 | 0.0002 |
| 10762896 | LOC360824  | 0.078639  | 0.9999 | 0.587301  | 0.0258 | 0.442809  | 0.0662 | 0.785681  | 0.0006 |
| 10762910 | Mn1        | 0.122318  | 0.9921 | -0.553098 | 0.0131 | -0.803248 | 0.0001 | -0.816530 | 0.0001 |
| 10763021 | Pole       | 0.034257  | 0.9999 | -0.230538 | 0.6472 | -0.305172 | 0.3216 | -0.765235 | 0.0025 |
| 10763171 | Stx1a      | -0.016880 | 0.9999 | 0.056887  | 0.8748 | 0.296048  | 0.0316 | 0.229494  | 0.1172 |
| 10763237 | RGD1307235 | 0.222966  | 0.9049 | 0.396168  | 0.0834 | 0.402724  | 0.0370 | 0.377783  | 0.0540 |
| 10763284 | Zcchc2     | 0.120116  | 0.9921 | 0.280711  | 0.3276 | 0.493631  | 0.0122 | 0.186011  | 0.4710 |
| 10763421 | Dsel       | 0.094437  | 0.9999 | 0.153703  | 0.8224 | 0.622286  | 0.0276 | 0.257250  | 0.4843 |
| 10763457 | ---        | 0.175844  | 0.9010 | 0.291333  | 0.1092 | 0.255201  | 0.1000 | 0.361228  | 0.0133 |
| 10763489 | Clasp1     | 0.198579  | 0.9570 | 0.476402  | 0.0448 | 0.722124  | 0.0004 | 0.601570  | 0.0025 |
| 10763547 | Tmem185b   | -0.177186 | 0.8973 | -0.228741 | 0.2571 | -0.347061 | 0.0176 | -0.153431 | 0.4016 |
| 10763587 | Slc35f5    | -0.149495 | 0.9653 | 0.422860  | 0.0448 | 0.512817  | 0.0045 | 0.504247  | 0.0044 |
| 10763604 | Gpr39      | 0.110353  | 0.9999 | -0.657448 | 0.0598 | -0.832253 | 0.0048 | -0.698684 | 0.0182 |
| 10763654 | R3hdm1     | 0.314353  | 0.7837 | 0.300129  | 0.2292 | 0.419714  | 0.0239 | 0.288813  | 0.1541 |
| 10763926 | Rbbp5      | 0.080432  | 0.9998 | 0.245951  | 0.3150 | 0.303135  | 0.0889 | 0.353123  | 0.0417 |
| 10763935 | Pik3c2b    | 0.319586  | 0.8614 | 0.410445  | 0.1874 | 0.401047  | 0.1097 | 0.526073  | 0.0276 |
| 10764034 | Etnk2      | 0.098296  | 0.9921 | 0.212986  | 0.3225 | 0.290865  | 0.0572 | 0.379784  | 0.0097 |
| 10764144 | Kdm5b      | 0.232474  | 0.8997 | 0.290339  | 0.2821 | 0.600610  | 0.0017 | 0.390153  | 0.0473 |
| 10764184 | Ube2t      | -0.020504 | 0.9999 | -0.646009 | 0.2077 | -0.899349 | 0.0204 | -1.166368 | 0.0018 |
| 10764318 | Ddx59      | -0.022904 | 0.9999 | -0.203556 | 0.1183 | -0.183430 | 0.0958 | -0.246928 | 0.0182 |
| 10764388 | ---        | 0.086482  | 0.9999 | 0.196312  | 0.6049 | 0.434354  | 0.0381 | 0.201350  | 0.4497 |
| 10764415 | Aspm       | 0.003156  | 0.9999 | -0.842113 | 0.0217 | -0.897105 | 0.0060 | -1.147460 | 0.0004 |
| 10764460 | Kcnt2      | -0.124701 | 0.9010 | -0.137284 | 0.3926 | -0.218350 | 0.0413 | -0.185526 | 0.0973 |
| 10764661 | Fam129a    | 0.015577  | 0.9999 | -0.410050 | 0.4378 | -0.481616 | 0.1941 | -0.840932 | 0.0108 |
| 10764702 | Glt25d2    | 0.069627  | 0.9999 | 0.493349  | 0.1282 | 0.599306  | 0.0218 | 0.605403  | 0.0192 |
| 10764842 | Nphs2      | -0.177739 | 0.7312 | -0.039700 | 0.8756 | -0.193531 | 0.0473 | -0.056388 | 0.7001 |
| 10764852 | Abl2       | 0.055028  | 0.9999 | 0.279104  | 0.3467 | 0.527522  | 0.0086 | 0.364888  | 0.0861 |
| 10764996 | Rc3h1      | 0.257524  | 0.9589 | 0.452742  | 0.2077 | 0.764199  | 0.0044 | 0.509950  | 0.0704 |
| 10765017 | ---        | 0.175828  | 0.9921 | 0.161162  | 0.8142 | 0.630940  | 0.0285 | 0.495743  | 0.1024 |
| 10765096 | Tnfsf18    | -0.059217 | 0.9999 | -1.728353 | 0.0000 | -2.029663 | 0.0000 | -2.115507 | 0.0000 |
| 10765105 | ---        | -0.087530 | 0.9998 | -0.242784 | 0.3926 | -0.255637 | 0.2205 | -0.470471 | 0.0102 |
| 10765109 | ---        | -0.064255 | 0.9999 | -0.180276 | 0.7183 | -0.277393 | 0.3268 | -0.593844 | 0.0117 |
| 10765248 | Slc19a2    | -0.173826 | 0.9968 | 0.489776  | 0.2642 | 0.832840  | 0.0080 | 0.866654  | 0.0048 |
| 10765280 | Dpt        | 0.647289  | 0.8965 | -1.811003 | 0.0012 | -2.520045 | 0.0000 | -2.964767 | 0.0000 |
| 10765437 | Rgs5       | -0.127436 | 0.9999 | -0.681398 | 0.1000 | -0.995026 | 0.0032 | -1.234727 | 0.0002 |
| 10765444 | ---        | -0.276793 | 0.9990 | -1.296515 | 0.0392 | -1.590162 | 0.0034 | -1.828895 | 0.0006 |
| 10765497 | Fcgr3a     | 0.113360  | 0.9593 | -0.304678 | 0.0224 | -0.408130 | 0.0006 | -0.391376 | 0.0007 |

|          |            |           |        |           |        |           |        |           |        |
|----------|------------|-----------|--------|-----------|--------|-----------|--------|-----------|--------|
| 10765542 | B4galt3    | 0.077432  | 0.9921 | 0.309984  | 0.0148 | 0.350428  | 0.0023 | 0.369444  | 0.0010 |
| 10765574 | Arhgap30   | -0.000468 | 0.9999 | -0.196038 | 0.2214 | -0.298142 | 0.0121 | -0.206000 | 0.1058 |
| 10765600 | F11r       | 0.289648  | 0.9525 | 0.325574  | 0.5026 | 0.519323  | 0.0860 | 0.739817  | 0.0095 |
| 10765634 | Cd48       | 0.166098  | 0.9977 | -0.320817 | 0.5599 | -0.389320 | 0.2802 | -0.688495 | 0.0278 |
| 10765650 | Cd84       | 0.247694  | 0.7200 | -0.439603 | 0.0012 | -0.448915 | 0.0004 | -0.421000 | 0.0007 |
| 10765720 | Pex19      | -0.060521 | 0.9999 | 0.146673  | 0.6026 | 0.315139  | 0.0441 | 0.348896  | 0.0232 |
| 10765730 | Igsf8      | -0.203019 | 0.9632 | 0.488764  | 0.0976 | 0.470337  | 0.0584 | 0.606490  | 0.0110 |
| 10765746 | Slamf9     | 0.089734  | 0.9978 | -0.580544 | 0.0014 | -0.771899 | 0.0000 | -0.512818 | 0.0020 |
| 10765778 | Ccdc19     | -0.070611 | 0.9999 | 0.472479  | 0.0428 | 0.156309  | 0.5661 | 0.251639  | 0.2934 |
| 10765996 | Exo1       | -0.152260 | 0.9624 | -0.186845 | 0.5193 | -0.306056 | 0.0873 | -0.423529 | 0.0122 |
| 10766094 | Cnst       | -0.082201 | 0.9994 | 0.319490  | 0.1306 | 0.595115  | 0.0004 | 0.423349  | 0.0108 |
| 10766428 | Tlr5       | 0.129718  | 0.9632 | -0.194460 | 0.4224 | -0.303285 | 0.0564 | -0.433986 | 0.0040 |
| 10766468 | Rab3gap2   | -0.198753 | 0.9921 | 0.504555  | 0.2051 | 0.914441  | 0.0022 | 0.653468  | 0.0306 |
| 10766588 | Esrrg      | -0.032134 | 0.9999 | 0.343425  | 0.2821 | 0.477664  | 0.0384 | 0.625164  | 0.0048 |
| 10766765 | Nek2       | -0.097541 | 0.9999 | -1.151200 | 0.0653 | -1.134850 | 0.0341 | -1.759715 | 0.0006 |
| 10766959 | Kdsr       | 0.127754  | 0.9990 | 0.436284  | 0.2084 | 0.545164  | 0.0399 | 0.399159  | 0.1678 |
| 10766982 | Serpinb3a  | -0.103062 | 0.8628 | -0.188018 | 0.0332 | -0.026651 | 0.8398 | -0.032036 | 0.8034 |
| 10767013 | Esco1      | 0.170239  | 0.9921 | 0.332727  | 0.4018 | 0.564494  | 0.0306 | 0.393833  | 0.1698 |
| 10767102 | Epb4.115   | -0.082940 | 0.9936 | 0.156196  | 0.5090 | 0.411706  | 0.0033 | 0.265493  | 0.0704 |
| 10767132 | Ptpn4      | 0.176473  | 0.9931 | 0.674261  | 0.0513 | 0.834316  | 0.0047 | 0.803645  | 0.0056 |
| 10767175 | Insig2     | 0.128331  | 0.9950 | 0.380130  | 0.1999 | 0.419003  | 0.0705 | 0.556912  | 0.0117 |
| 10767243 | Lypd1      | 0.052404  | 0.9999 | -1.362515 | 0.0045 | -0.904806 | 0.0464 | -1.382438 | 0.0014 |
| 10767247 | Nap5       | 0.286255  | 0.9247 | 0.645772  | 0.0289 | 0.627036  | 0.0163 | 0.381515  | 0.1937 |
| 10767338 | Mcm6       | 0.044626  | 0.9999 | -0.311316 | 0.6414 | -0.600854 | 0.0996 | -1.178879 | 0.0005 |
| 10767539 | Srgap2     | 0.254287  | 0.8945 | 0.633184  | 0.0041 | 0.641263  | 0.0017 | 0.604585  | 0.0023 |
| 10767698 | Zc3h11a    | 0.089262  | 0.9968 | 0.204042  | 0.4122 | 0.348200  | 0.0324 | 0.211210  | 0.2608 |
| 10767763 | Prelp      | 0.293479  | 0.9968 | -1.625655 | 0.0043 | -2.273994 | 0.0000 | -1.844067 | 0.0004 |
| 10767876 | Ptprv      | 0.355433  | 0.8614 | -0.686488 | 0.0140 | -0.855760 | 0.0007 | -1.019123 | 0.0001 |
| 10768021 | Pkp1       | -0.216233 | 0.9999 | 1.660407  | 0.0017 | 2.045503  | 0.0001 | 1.525888  | 0.0016 |
| 10768093 | Camsap111  | 0.116738  | 0.9921 | 0.370473  | 0.0922 | 0.553218  | 0.0022 | 0.507968  | 0.0039 |
| 10768112 | Wbscr27    | 0.150686  | 0.9632 | -0.334160 | 0.1392 | -0.470373 | 0.0083 | -0.368793 | 0.0433 |
| 10768138 | Ptprc      | 0.563422  | 0.7200 | -0.817112 | 0.0088 | -0.948547 | 0.0008 | -0.753556 | 0.0071 |
| 10768236 | Cfh        | -0.126923 | 0.8614 | -0.256711 | 0.0128 | -0.282745 | 0.0024 | -0.147063 | 0.1520 |
| 10768269 | Cfh        | 0.359277  | 0.8973 | -0.988673 | 0.0017 | -1.152167 | 0.0001 | -1.038680 | 0.0004 |
| 10768305 | Cdc73      | 0.091285  | 0.9999 | 0.343282  | 0.3507 | 0.673235  | 0.0066 | 0.513354  | 0.0437 |
| 10768323 | Trove2     | 0.124972  | 0.9999 | 0.324795  | 0.4475 | 0.636285  | 0.0183 | 0.385351  | 0.2056 |
| 10768332 | Rgs2       | -0.412860 | 0.8770 | -0.847062 | 0.0169 | -0.909539 | 0.0043 | -1.180338 | 0.0002 |
| 10768346 | Rgs1       | 0.355332  | 0.8336 | -0.215310 | 0.6119 | -0.431709 | 0.0680 | -0.484364 | 0.0370 |
| 10768357 | Rgs18      | 0.646535  | 0.2425 | -0.702491 | 0.0053 | -0.731155 | 0.0016 | -0.865154 | 0.0002 |
| 10768426 | Hmcn1      | 0.037598  | 0.9999 | -0.194580 | 0.5758 | -0.390080 | 0.0493 | -0.424056 | 0.0301 |
| 10768538 | RGD1308695 | 0.136900  | 0.9999 | 0.422919  | 0.4809 | 0.740089  | 0.0469 | 0.408732  | 0.3609 |
| 10768588 | Rgl1       | 0.162990  | 0.9624 | -0.371011 | 0.1037 | -0.442195 | 0.0177 | -0.552758 | 0.0022 |
| 10768609 | Smg7       | 0.001127  | 0.9999 | 0.320209  | 0.1751 | 0.692011  | 0.0002 | 0.595201  | 0.0008 |
| 10768874 | Cep350     | 0.169159  | 0.9805 | 0.281975  | 0.4094 | 0.461388  | 0.0404 | 0.193201  | 0.5128 |
| 10769047 | Rasal2     | 0.109334  | 0.9921 | 0.256966  | 0.2831 | 0.386333  | 0.0246 | 0.239633  | 0.2184 |
| 10769262 | RGD1309106 | 0.022760  | 0.9999 | 0.114261  | 0.5853 | 0.110825  | 0.4506 | 0.346281  | 0.0021 |
| 10769297 | ---        | -0.072764 | 0.9999 | -0.207712 | 0.3837 | -0.260545 | 0.1180 | -0.329861 | 0.0388 |

|          |                  |           |        |           |        |           |        |           |        |
|----------|------------------|-----------|--------|-----------|--------|-----------|--------|-----------|--------|
| 10769310 | Bat2d1           | 0.226782  | 0.9010 | 0.365975  | 0.1222 | 0.439796  | 0.0217 | 0.409584  | 0.0330 |
| 10769476 | Atp1b1           | -0.066253 | 0.9950 | 0.253823  | 0.0657 | 0.335163  | 0.0038 | 0.472230  | 0.0001 |
| 10769517 | Deaf6            | -0.018898 | 0.9999 | 0.396549  | 0.1363 | 0.483774  | 0.0231 | 0.487623  | 0.0207 |
| 10769621 | Uck2             | -0.187930 | 0.9333 | 0.324577  | 0.1575 | 0.522619  | 0.0033 | 0.308488  | 0.1065 |
| 10769657 | Nuf2             | -0.033175 | 0.9999 | -0.953225 | 0.0728 | -1.205319 | 0.0065 | -1.511983 | 0.0005 |
| 10769693 | ---              | 0.379080  | 0.8832 | -0.254324 | 0.6613 | -0.052093 | 0.9279 | -0.695404 | 0.0186 |
| 10769695 | Ddr2             | 0.081493  | 0.9999 | -0.442362 | 0.2550 | -0.423282 | 0.1668 | -0.771758 | 0.0049 |
| 10769788 | Fcgr2a           | 0.288798  | 0.9872 | -0.776148 | 0.1363 | -1.068011 | 0.0096 | -0.817579 | 0.0549 |
| 10769797 | Fcgr2a // Fcgr2a | 0.320120  | 0.9625 | -0.650118 | 0.1815 | -1.018227 | 0.0060 | -0.761247 | 0.0458 |
| 10769812 | Pcp4l1           | 0.292087  | 0.9795 | -0.434243 | 0.4898 | -0.897581 | 0.0185 | -0.683135 | 0.0888 |
| 10769825 | Fcer1g           | 0.472095  | 0.9729 | -1.947349 | 0.0024 | -2.245789 | 0.0002 | -2.088840 | 0.0004 |
| 10769998 | Atp1a2           | -0.291524 | 0.9582 | 0.724043  | 0.0368 | 0.547281  | 0.0829 | 0.617456  | 0.0458 |
| 10770032 | Slamf8           | 0.192515  | 0.8614 | -0.326861 | 0.0404 | -0.312792 | 0.0250 | -0.147823 | 0.3916 |
| 10770070 | Cadm3            | 0.042696  | 0.9999 | -0.203394 | 0.5670 | -0.409118 | 0.0445 | -0.281725 | 0.2166 |
| 10770082 | Ifi204           | 0.305478  | 0.9310 | -0.999971 | 0.0011 | -1.035667 | 0.0004 | -0.840958 | 0.0028 |
| 10770119 | Rgs7             | -0.064273 | 0.9990 | -0.531819 | 0.0001 | -0.711404 | 0.0000 | -0.581912 | 0.0000 |
| 10770197 | Akt3             | 0.114861  | 0.9934 | 0.340355  | 0.1767 | 0.558091  | 0.0038 | 0.412950  | 0.0350 |
| 10770252 | Tfb2m            | -0.013813 | 0.9999 | 0.389815  | 0.2801 | 0.588621  | 0.0231 | 0.341920  | 0.2531 |
| 10770261 | Ahctf1           | 0.076779  | 0.9999 | 0.109805  | 0.8481 | 0.486538  | 0.0337 | 0.174547  | 0.5806 |
| 10770396 | Lbr              | 0.099108  | 0.9999 | -0.343991 | 0.2378 | -0.473868 | 0.0288 | -0.600636 | 0.0039 |
| 10770430 | Degs1            | -0.037640 | 0.9999 | 0.225307  | 0.2048 | 0.251910  | 0.0682 | 0.366937  | 0.0049 |
| 10770577 | Tgfb2            | -0.594775 | 0.9116 | 0.969179  | 0.1344 | 1.070452  | 0.0408 | 1.124889  | 0.0300 |
| 10770613 | Kctd3            | 0.058774  | 0.9999 | 0.245113  | 0.1321 | 0.273870  | 0.0374 | 0.248437  | 0.0650 |
| 10770637 | Kcnk2            | -0.408267 | 0.4739 | -1.649512 | 0.0000 | -1.727865 | 0.0000 | -1.706875 | 0.0000 |
| 10770649 | Cenpf            | 0.230189  | 0.9999 | -0.947076 | 0.1502 | -1.303302 | 0.0113 | -1.573872 | 0.0017 |
| 10770714 | Nenf             | -0.060442 | 0.9999 | -0.178860 | 0.6441 | -0.377037 | 0.0691 | -0.408424 | 0.0469 |
| 10770728 | Dtl              | 0.018844  | 0.9999 | -0.286990 | 0.7139 | -0.615009 | 0.1227 | -1.014256 | 0.0056 |
| 10770759 | Sertad4          | -0.165116 | 0.9999 | 0.924085  | 0.0313 | 0.397247  | 0.3887 | 0.595623  | 0.1497 |
| 10770795 | Hsd11b1          | 0.484698  | 0.9507 | -1.692768 | 0.0008 | -1.874788 | 0.0001 | -1.573464 | 0.0007 |
| 10770807 | G0s2             | 0.133061  | 0.9998 | -0.303907 | 0.5099 | -0.611097 | 0.0273 | -0.259417 | 0.4674 |
| 10770810 | Camk1g           | 0.168406  | 0.9539 | 0.204798  | 0.4480 | 0.362510  | 0.0349 | 0.259255  | 0.1681 |
| 10770844 | Cr1l             | -0.036549 | 0.9999 | -0.279652 | 0.2722 | -0.386552 | 0.0365 | -0.385189 | 0.0369 |
| 10770924 | ---              | 0.145781  | 0.9867 | 0.102950  | 0.8413 | 0.444905  | 0.0323 | 0.125922  | 0.6857 |
| 10771131 | ---              | 0.173344  | 0.8339 | 0.217926  | 0.1171 | 0.194188  | 0.0993 | 0.338099  | 0.0019 |
| 10771171 | ---              | 0.122945  | 0.9999 | -0.936081 | 0.0021 | -1.187693 | 0.0000 | -1.072157 | 0.0002 |
| 10771224 | Hsd17b11         | 0.390972  | 0.7409 | -0.372294 | 0.2016 | -0.446119 | 0.0470 | -0.472861 | 0.0332 |
| 10771258 | Slc10a6          | 0.074519  | 0.9999 | -0.221226 | 0.3599 | -0.376969 | 0.0211 | -0.278830 | 0.1090 |
| 10771669 | Sdad1            | -0.006130 | 0.9999 | 0.160979  | 0.7446 | 0.486466  | 0.0349 | 0.103373  | 0.7822 |
| 10771690 | Naaa             | 0.340406  | 0.8614 | -0.760820 | 0.0031 | -0.823069 | 0.0006 | -0.574905 | 0.0159 |
| 10771732 | Cdkl2            | 0.170918  | 0.7200 | -0.171684 | 0.1198 | -0.272346 | 0.0021 | -0.307866 | 0.0004 |
| 10771783 | Ankrd17          | 0.149482  | 0.9624 | 0.231617  | 0.3708 | 0.484130  | 0.0048 | 0.332121  | 0.0635 |
| 10772176 | RGD1359460       | 0.008910  | 0.9999 | 0.235074  | 0.4591 | 0.438581  | 0.0281 | 0.361538  | 0.0814 |
| 10772231 | Nmu              | -0.104460 | 0.9950 | 0.517401  | 0.0104 | 0.398222  | 0.0327 | 0.134655  | 0.6088 |
| 10772249 | Clock            | -0.026552 | 0.9999 | 0.258670  | 0.4349 | 0.546378  | 0.0091 | 0.354555  | 0.1172 |
| 10772272 | ---              | 0.176044  | 0.9925 | 0.535991  | 0.1575 | 0.607725  | 0.0432 | 0.645190  | 0.0301 |
| 10772294 | Scfd2            | 0.009253  | 0.9999 | -0.316485 | 0.3186 | -0.418683 | 0.0647 | -0.725866 | 0.0007 |
| 10772330 | ---              | 0.069678  | 0.9999 | 0.238946  | 0.3032 | 0.218548  | 0.2356 | 0.362609  | 0.0267 |

|          |            |           |        |           |        |           |        |           |        |
|----------|------------|-----------|--------|-----------|--------|-----------|--------|-----------|--------|
| 10772342 | ---        | 0.294892  | 0.8570 | 0.584872  | 0.0096 | 0.796843  | 0.0001 | 0.643186  | 0.0013 |
| 10772408 | Tec        | -0.029777 | 0.9999 | 0.136744  | 0.8566 | 0.800779  | 0.0063 | 0.426955  | 0.1995 |
| 10772623 | Bend4      | -0.218418 | 0.9299 | 0.627575  | 0.0039 | 0.600713  | 0.0028 | 0.702148  | 0.0004 |
| 10772665 | Pds5a      | 0.177158  | 0.9507 | 0.306893  | 0.1808 | 0.456595  | 0.0091 | 0.383662  | 0.0302 |
| 10772705 | Ugdh       | -0.093908 | 0.9999 | -0.755906 | 0.0042 | -0.736470 | 0.0025 | -0.759875 | 0.0014 |
| 10772782 | ---        | -0.102575 | 0.9916 | -0.121806 | 0.6850 | -0.168647 | 0.3454 | -0.327692 | 0.0295 |
| 10772863 | Arap2      | -0.028586 | 0.9999 | 0.685853  | 0.0274 | 0.824418  | 0.0026 | 0.508192  | 0.0777 |
| 10772950 | Rpsa       | -0.019713 | 0.9999 | -0.146060 | 0.6725 | -0.433979 | 0.0125 | -0.319016 | 0.0814 |
| 10772982 | Rpl36      | -0.208723 | 0.9620 | -0.235338 | 0.5683 | -0.472618 | 0.0452 | -0.470172 | 0.0470 |
| 10772984 | Rpl36      | -0.208723 | 0.9620 | -0.235338 | 0.5683 | -0.472618 | 0.0452 | -0.470172 | 0.0470 |
| 10773080 | Qdpr       | 0.022881  | 0.9999 | -0.404116 | 0.0565 | -0.476929 | 0.0082 | -0.494634 | 0.0051 |
| 10773168 | Hmgb2      | 0.083487  | 0.9999 | -0.936220 | 0.0119 | -1.148292 | 0.0006 | -1.478731 | 0.0000 |
| 10773423 | RGD1308380 | 0.088971  | 0.9999 | 0.147763  | 0.7279 | 0.426734  | 0.0354 | 0.096978  | 0.7651 |
| 10773435 | Cpz        | 0.497041  | 0.8578 | -1.046119 | 0.0056 | -1.421915 | 0.0001 | -1.467954 | 0.0000 |
| 10773481 | Mfsd10     | 0.043193  | 0.9999 | -0.167586 | 0.4836 | -0.304225 | 0.0391 | -0.279110 | 0.0635 |
| 10773663 | Eif4enif1  | -0.020311 | 0.9999 | 0.287848  | 0.2804 | 0.469722  | 0.0131 | 0.296607  | 0.1561 |
| 10774015 | Aebp1      | -0.007675 | 0.9999 | -0.408199 | 0.3956 | -0.635233 | 0.0475 | -0.917150 | 0.0026 |
| 10774115 | Ramp3      | -0.654092 | 0.7200 | -1.303374 | 0.0002 | -1.747235 | 0.0000 | -1.603604 | 0.0000 |
| 10774306 | Cnrip1     | 0.137613  | 0.9921 | -0.482406 | 0.0419 | -0.696451 | 0.0006 | -0.819747 | 0.0001 |
| 10774345 | Spred2     | 0.094915  | 0.9931 | -0.010596 | 0.9857 | 0.158927  | 0.4269 | 0.329381  | 0.0434 |
| 10774359 | Rpl38      | -0.128427 | 0.9451 | -0.155737 | 0.4275 | -0.309230 | 0.0131 | -0.161893 | 0.2702 |
| 10774383 | Vps54      | 0.202450  | 0.8945 | 0.179158  | 0.5107 | 0.362199  | 0.0270 | 0.247339  | 0.1698 |
| 10774435 | Gbp111     | 0.104843  | 0.9985 | 0.305707  | 0.2824 | 0.492058  | 0.0151 | 0.372684  | 0.0794 |
| 10774497 | LOC360990  | 0.149385  | 0.9793 | 0.313295  | 0.2334 | 0.561289  | 0.0036 | 0.410877  | 0.0365 |
| 10774596 | Bcl11a     | -0.010752 | 0.9999 | 0.842707  | 0.0053 | 1.170710  | 0.0000 | 1.076887  | 0.0001 |
| 10774605 | ---        | 0.021416  | 0.9999 | 1.165333  | 0.0044 | 1.266271  | 0.0008 | 1.377603  | 0.0002 |
| 10774612 | Fanc1      | 0.044224  | 0.9999 | -0.301629 | 0.5682 | -0.523120 | 0.0922 | -0.649685 | 0.0295 |
| 10774638 | Efemp1     | 0.543487  | 0.8570 | -1.686100 | 0.0000 | -1.613716 | 0.0000 | -1.648596 | 0.0000 |
| 10774766 | Rtn4       | -0.043223 | 0.9999 | 0.274600  | 0.0741 | 0.437950  | 0.0006 | 0.530673  | 0.0000 |
| 10774782 | Sptbn1     | 0.043150  | 0.9999 | 0.315643  | 0.1101 | 0.370097  | 0.0219 | 0.337070  | 0.0383 |
| 10774830 | Psme4      | 0.168082  | 0.9444 | 0.109324  | 0.7653 | 0.353329  | 0.0323 | 0.249634  | 0.1674 |
| 10774894 | Rpl41      | -0.106977 | 0.9990 | -0.187033 | 0.6560 | -0.450663 | 0.0400 | -0.464173 | 0.0332 |
| 10774966 | ---        | -0.322305 | 0.2371 | -0.239500 | 0.0747 | -0.207970 | 0.0757 | -0.333495 | 0.0023 |
| 10774992 | Fgfr11     | -0.135218 | 0.9624 | 0.321673  | 0.0896 | 0.391152  | 0.0122 | 0.385079  | 0.0127 |
| 10775063 | Pigg       | 0.089075  | 0.9999 | 0.220041  | 0.5123 | 0.543299  | 0.0062 | 0.343651  | 0.1075 |
| 10775084 | Ccdc18     | -0.206276 | 0.7316 | -0.241113 | 0.0723 | -0.278348 | 0.0131 | -0.343533 | 0.0017 |
| 10775231 | Cdc7       | 0.032699  | 0.9999 | -0.294087 | 0.5874 | -0.268248 | 0.4894 | -0.693718 | 0.0202 |
| 10775271 | Lrrc8c     | -0.010707 | 0.9999 | 1.006050  | 0.0004 | 1.160680  | 0.0000 | 1.082625  | 0.0001 |
| 10775278 | Lrrc8b     | 0.319846  | 0.8339 | -0.387906 | 0.1365 | -0.425451 | 0.0433 | -0.390637 | 0.0702 |
| 10775303 | ---        | -0.292795 | 0.8945 | -0.368951 | 0.2643 | -0.581535 | 0.0142 | -0.557992 | 0.0183 |
| 10775338 | Pkd2       | -0.125763 | 0.9990 | 0.775630  | 0.0047 | 1.030977  | 0.0001 | 0.771407  | 0.0018 |
| 10775365 | Ibsp       | -0.148910 | 0.7989 | -0.123357 | 0.3615 | -0.146045 | 0.1321 | -0.189903 | 0.0395 |
| 10775731 | Cxcl13     | 0.254577  | 0.9631 | -0.625256 | 0.0842 | -0.835763 | 0.0052 | -0.744016 | 0.0122 |
| 10775769 | 11-Sep     | -0.177309 | 0.9630 | -0.469857 | 0.0522 | -0.663444 | 0.0013 | -0.784034 | 0.0001 |
| 10775782 | Shroom3    | -0.203628 | 0.9429 | 0.196840  | 0.5766 | 0.398208  | 0.0474 | 0.382955  | 0.0595 |
| 10775859 | LOC688608  | 0.036868  | 0.9999 | 0.147672  | 0.4010 | 0.158092  | 0.2178 | 0.247234  | 0.0322 |
| 10775914 | Pf4        | 0.254475  | 0.9921 | -1.662831 | 0.0001 | -1.910090 | 0.0000 | -1.537033 | 0.0002 |

|          |            |           |        |           |        |           |        |           |        |
|----------|------------|-----------|--------|-----------|--------|-----------|--------|-----------|--------|
| 10775968 | Alb        | 0.025801  | 0.9999 | 0.069446  | 0.7326 | 0.044791  | 0.7648 | 0.223015  | 0.0186 |
| 10776026 | Dck        | -0.023800 | 0.9999 | -0.418394 | 0.2700 | -0.541816 | 0.0516 | -0.762542 | 0.0039 |
| 10776133 | Csn3       | -0.182358 | 0.7312 | -0.213222 | 0.0663 | -0.255847 | 0.0089 | -0.211538 | 0.0327 |
| 10776239 | Stap1      | 0.129101  | 0.9310 | -0.184675 | 0.2747 | -0.249683 | 0.0425 | -0.109017 | 0.4943 |
| 10776370 | Cep135     | -0.045667 | 0.9999 | -0.174250 | 0.5948 | -0.316076 | 0.0943 | -0.385594 | 0.0341 |
| 10776459 | Pdgfra     | 0.251703  | 0.9695 | -1.286858 | 0.0001 | -1.643800 | 0.0000 | -1.841390 | 0.0000 |
| 10776681 | Slc30a9    | -0.007914 | 0.9999 | 0.272660  | 0.1705 | 0.316934  | 0.0426 | 0.373351  | 0.0141 |
| 10776739 | Uchl1      | -0.135272 | 0.9999 | 0.948929  | 0.0028 | 0.958445  | 0.0012 | 1.115898  | 0.0002 |
| 10776875 | Klhl5      | 0.363403  | 0.7905 | -0.359497 | 0.2108 | -0.322864 | 0.1697 | -0.444431 | 0.0434 |
| 10777123 | ---        | -0.196014 | 0.8045 | -0.274104 | 0.0565 | -0.219875 | 0.0863 | -0.335430 | 0.0051 |
| 10777182 | RGD1562646 | -0.005404 | 0.9999 | -0.896723 | 0.0677 | -1.007728 | 0.0150 | -1.317622 | 0.0011 |
| 10777232 | Cd38       | -0.306313 | 0.9620 | -0.311899 | 0.6281 | -1.091111 | 0.0013 | -1.047123 | 0.0015 |
| 10777283 | C1qtnf7    | 0.212205  | 0.9201 | -0.304672 | 0.2315 | -0.341252 | 0.0818 | -0.379712 | 0.0487 |
| 10777290 | Cpeb2      | 0.213028  | 0.9277 | 0.341888  | 0.1815 | 0.540366  | 0.0055 | 0.307107  | 0.1541 |
| 10777307 | ---        | -0.201481 | 0.5767 | -0.215672 | 0.0355 | -0.158543 | 0.0915 | -0.243670 | 0.0054 |
| 10777355 | Evc2       | 0.198193  | 0.9170 | -0.157592 | 0.6351 | -0.234979 | 0.2311 | -0.529125 | 0.0017 |
| 10777639 | Grk4       | 0.047337  | 0.9999 | 0.393439  | 0.0315 | 0.484434  | 0.0024 | 0.327717  | 0.0460 |
| 10777731 | Whsc1      | 0.137027  | 0.9889 | -0.382568 | 0.1198 | -0.299433 | 0.1642 | -0.442622 | 0.0259 |
| 10777770 | Tacc3      | 0.092152  | 0.9999 | -0.999878 | 0.0589 | -1.035873 | 0.0224 | -1.675308 | 0.0002 |
| 10777829 | Ywhah      | 0.035627  | 0.9999 | 0.168187  | 0.1461 | 0.093607  | 0.4061 | 0.197970  | 0.0311 |
| 10777928 | Limk2      | -0.081802 | 0.9959 | 0.307345  | 0.0787 | 0.311538  | 0.0351 | 0.218723  | 0.1796 |
| 10777958 | Inpp5j     | 0.005896  | 0.9999 | 0.543357  | 0.0147 | 0.444257  | 0.0293 | 0.657150  | 0.0008 |
| 10778021 | Slc35e4    | -0.047697 | 0.9999 | 0.204668  | 0.4472 | 0.430918  | 0.0107 | 0.074814  | 0.7891 |
| 10778082 | Mtmr3      | 0.108653  | 0.9921 | 0.223783  | 0.4093 | 0.480742  | 0.0059 | 0.202800  | 0.3438 |
| 10778179 | Kremen1    | -0.236519 | 0.9624 | 1.234187  | 0.0000 | 1.198602  | 0.0000 | 1.601103  | 0.0000 |
| 10778189 | ---        | 0.153546  | 0.9626 | 0.213276  | 0.4594 | 0.137592  | 0.5711 | 0.363706  | 0.0474 |
| 10778192 | ---        | 0.007727  | 0.9999 | 0.329090  | 0.2804 | 0.562257  | 0.0094 | 0.382617  | 0.0977 |
| 10778214 | Urg4       | -0.047578 | 0.9999 | 0.219232  | 0.5320 | 0.462826  | 0.0248 | 0.401087  | 0.0572 |
| 10778220 | Pgam2      | 0.069727  | 0.9999 | -0.903339 | 0.0315 | -1.205354 | 0.0010 | -1.244970 | 0.0006 |
| 10778236 | Pold2      | -0.063654 | 0.9999 | -0.304726 | 0.3787 | -0.450372 | 0.0555 | -0.760177 | 0.0007 |
| 10778311 | Tmed4      | 0.134428  | 0.9843 | 0.382128  | 0.0842 | 0.413045  | 0.0260 | 0.571382  | 0.0014 |
| 10778390 | Igfbp3     | 0.533391  | 0.8339 | -0.850512 | 0.0302 | -0.726917 | 0.0379 | -0.672881 | 0.0592 |
| 10778486 | Ddc        | 0.238110  | 0.9038 | 0.620424  | 0.0044 | 0.707099  | 0.0005 | 0.761411  | 0.0001 |
| 10778577 | ---        | -0.123288 | 0.8541 | -0.252567 | 0.0047 | -0.179990 | 0.0321 | -0.158652 | 0.0656 |
| 10778629 | Aftph      | -0.010921 | 0.9999 | 0.225518  | 0.4898 | 0.645179  | 0.0010 | 0.348705  | 0.0962 |
| 10778708 | B3gnt2     | -0.153667 | 0.9659 | -0.630122 | 0.0019 | -0.297052 | 0.1482 | -0.458165 | 0.0153 |
| 10779093 | Usp54      | 0.093517  | 0.9999 | 0.312328  | 0.4645 | 0.538453  | 0.0458 | 0.479668  | 0.0851 |
| 10779099 | Ppp3cb     | 0.121209  | 0.9620 | 0.158053  | 0.4525 | 0.214232  | 0.1277 | 0.311210  | 0.0178 |
| 10779162 | Dnajc9     | 0.021389  | 0.9999 | -0.197729 | 0.7721 | -0.234819 | 0.5626 | -0.629488 | 0.0394 |
| 10779423 | Fezf2      | 0.046629  | 0.9999 | 0.259788  | 0.0278 | 0.109284  | 0.3940 | 0.141728  | 0.2402 |
| 10779428 | Fhit       | 0.166193  | 0.9626 | -0.179120 | 0.6234 | -0.197984 | 0.4102 | -0.400247 | 0.0430 |
| 10779436 | LOC361016  | -0.117929 | 0.9990 | -0.459270 | 0.1142 | -0.722352 | 0.0020 | -0.682273 | 0.0028 |
| 10779531 | LOC501427  | -0.463270 | 0.4943 | -0.415876 | 0.0855 | -0.474882 | 0.0184 | 0.120680  | 0.6936 |
| 10779602 | RGD1563070 | -0.339267 | 0.9668 | 1.220420  | 0.0083 | 0.795624  | 0.0694 | 0.971046  | 0.0219 |
| 10779638 | Cdkn3      | 0.083559  | 0.9999 | -0.944866 | 0.0737 | -1.122626 | 0.0111 | -1.385461 | 0.0013 |
| 10779654 | Samd4a     | -0.047430 | 0.9999 | 0.502645  | 0.0210 | 0.427965  | 0.0303 | 0.347733  | 0.0932 |
| 10779673 | Lgals3     | 0.287739  | 0.8660 | -0.778685 | 0.0007 | -0.745664 | 0.0006 | -0.888668 | 0.0000 |

|          |            |           |        |           |        |           |        |           |        |
|----------|------------|-----------|--------|-----------|--------|-----------|--------|-----------|--------|
| 10779758 | RGD1559923 | 0.167406  | 0.9589 | 0.212780  | 0.4415 | 0.387295  | 0.0284 | 0.286511  | 0.1312 |
| 10779818 | Np         | 0.143068  | 0.9942 | -0.413881 | 0.2077 | -0.706385 | 0.0040 | -0.510354 | 0.0430 |
| 10779832 | Rnase4     | 0.206732  | 0.9956 | -0.331219 | 0.6365 | -0.741858 | 0.0474 | -0.831212 | 0.0234 |
| 10780065 | LOC691130  | 0.018993  | 0.9999 | 0.111598  | 0.5894 | 0.135686  | 0.3120 | 0.279283  | 0.0134 |
| 10780205 | Mmp14      | 0.081200  | 0.9999 | -0.213833 | 0.6850 | -0.424276 | 0.1295 | -0.599247 | 0.0222 |
| 10780239 | Bcl2l2     | 0.076001  | 0.9999 | 0.315023  | 0.1802 | 0.396220  | 0.0296 | 0.220968  | 0.3031 |
| 10780393 | Fitm1      | 0.337373  | 0.9620 | -0.319243 | 0.6478 | -0.594189 | 0.1223 | -0.731757 | 0.0484 |
| 10780433 | Irf9       | 0.271261  | 0.9620 | -0.366487 | 0.4320 | -0.637251 | 0.0340 | -0.526960 | 0.0938 |
| 10780491 | RGD1308396 | 0.061843  | 0.9999 | 0.181188  | 0.6474 | 0.492107  | 0.0166 | 0.252946  | 0.3001 |
| 10780603 | Atp12a     | -0.263343 | 0.9865 | 0.910374  | 0.0274 | 0.928010  | 0.0108 | 0.983828  | 0.0058 |
| 10780716 | Mphosph8   | -0.067413 | 0.9999 | 0.404182  | 0.0786 | 0.553332  | 0.0037 | 0.617185  | 0.0009 |
| 10780737 | Zmym2      | 0.139195  | 0.9843 | 0.296694  | 0.2623 | 0.456754  | 0.0167 | 0.342869  | 0.0888 |
| 10780813 | Fgf9       | -0.051686 | 0.9999 | 1.092767  | 0.0004 | 1.294190  | 0.0000 | 1.607281  | 0.0000 |
| 10780850 | Shisa2     | -0.300747 | 0.8063 | -0.333113 | 0.1796 | -0.450564 | 0.0184 | -0.433784 | 0.0227 |
| 10780919 | Arl11      | 0.604971  | 0.7016 | -0.878855 | 0.0037 | -0.985163 | 0.0005 | -0.892452 | 0.0011 |
| 10780937 | Rnaseh2b   | 0.045141  | 0.9999 | -0.191699 | 0.6364 | -0.327463 | 0.1534 | -0.450777 | 0.0356 |
| 10781100 | Zfp395     | -0.008257 | 0.9999 | -0.226132 | 0.1567 | -0.375308 | 0.0024 | -0.371333 | 0.0021 |
| 10781131 | Scara5     | 0.274333  | 0.8973 | -0.803222 | 0.0008 | -0.810965 | 0.0003 | -0.819870 | 0.0002 |
| 10781146 | Pbk        | -0.103638 | 0.9999 | -1.311885 | 0.1200 | -1.692697 | 0.0124 | -2.456199 | 0.0002 |
| 10781166 | Clu        | 0.062670  | 0.9998 | 0.382200  | 0.0069 | 0.433537  | 0.0008 | 0.564500  | 0.0000 |
| 10781207 | Adra1a     | -0.208563 | 0.9917 | 0.888413  | 0.0073 | 1.151134  | 0.0002 | 1.236341  | 0.0001 |
| 10781220 | Ebf2       | -0.258956 | 0.9223 | -0.162259 | 0.7491 | -0.210193 | 0.4811 | -0.482417 | 0.0402 |
| 10781266 | Nefl       | -0.069017 | 0.9999 | 0.794760  | 0.0003 | 0.990566  | 0.0000 | 0.884877  | 0.0000 |
| 10781304 | Loxl2      | 0.079047  | 0.9999 | 0.870127  | 0.0392 | 0.774100  | 0.0373 | 0.410110  | 0.3627 |
| 10781378 | Hr         | -0.027597 | 0.9999 | 0.840770  | 0.0055 | 0.676622  | 0.0158 | 0.761869  | 0.0054 |
| 10781398 | Nudt18     | -0.132572 | 0.9665 | 0.475690  | 0.0084 | 0.347467  | 0.0388 | 0.461814  | 0.0041 |
| 10781404 | Dok2       | 0.200249  | 0.9525 | -0.347139 | 0.1850 | -0.359933 | 0.0849 | -0.432534 | 0.0321 |
| 10781496 | Lcp1       | 0.716230  | 0.8437 | -1.362199 | 0.0076 | -1.874507 | 0.0001 | -1.623075 | 0.0004 |
| 10781581 | Tsc22d1    | -0.229180 | 0.8997 | 0.589657  | 0.0038 | 0.599073  | 0.0015 | 0.655607  | 0.0004 |
| 10781785 | ---        | 0.096723  | 0.9620 | 0.212604  | 0.0992 | 0.176872  | 0.1133 | 0.232079  | 0.0290 |
| 10781794 | RGD1309522 | 0.056452  | 0.9999 | -0.796068 | 0.0491 | -0.816611 | 0.0193 | -1.038261 | 0.0021 |
| 10781999 | ---        | 0.700825  | 0.7200 | -0.573560 | 0.2488 | -0.875647 | 0.0156 | -1.290316 | 0.0003 |
| 10782056 | Rap2a      | -0.088968 | 0.9624 | -0.216333 | 0.0784 | -0.241537 | 0.0191 | -0.199901 | 0.0595 |
| 10782144 | Clybl      | 0.258930  | 0.9852 | -0.513251 | 0.3166 | -1.116342 | 0.0016 | -0.938767 | 0.0071 |
| 10782187 | Itgbl1     | 0.498078  | 0.9734 | -1.391556 | 0.0651 | -2.599230 | 0.0001 | -2.478494 | 0.0001 |
| 10782220 | Samd8      | -0.007962 | 0.9999 | 0.146176  | 0.4836 | 0.297708  | 0.0192 | 0.269260  | 0.0356 |
| 10782271 | Plau       | 0.402068  | 0.9201 | -1.150148 | 0.0026 | -1.669670 | 0.0000 | -1.975361 | 0.0000 |
| 10782437 | Zfp385d    | -0.615905 | 0.3730 | 0.631239  | 0.0178 | 0.691395  | 0.0038 | 0.214063  | 0.5016 |
| 10782599 | RGD1306063 | 0.001724  | 0.9999 | -0.067718 | 0.8654 | -0.423013 | 0.0059 | -0.225171 | 0.1965 |
| 10782695 | Abhd6      | 0.093892  | 0.9999 | 0.558878  | 0.0976 | 0.755088  | 0.0061 | 0.746597  | 0.0058 |
| 10782891 | Bmp4       | 0.050516  | 0.9999 | -0.348416 | 0.3134 | -0.147184 | 0.6737 | -0.487413 | 0.0478 |
| 10782927 | Wdhd1      | 0.056725  | 0.9999 | -0.272450 | 0.4251 | -0.250671 | 0.3332 | -0.476267 | 0.0303 |
| 10782956 | Dlgap5     | 0.005794  | 0.9999 | -1.065735 | 0.0612 | -1.155953 | 0.0170 | -1.592991 | 0.0007 |
| 10783572 | Haus4      | -0.106391 | 0.9921 | -0.238713 | 0.3331 | -0.352885 | 0.0404 | -0.406325 | 0.0156 |
| 10783605 | ---        | -0.212893 | 0.4060 | -0.175558 | 0.0928 | -0.190475 | 0.0285 | -0.107607 | 0.2913 |
| 10783669 | Slc22a17   | 0.025088  | 0.9999 | 0.318531  | 0.2957 | 0.492063  | 0.0232 | 0.735519  | 0.0005 |
| 10783715 | Myh7       | -0.123307 | 0.9868 | 0.410540  | 0.0428 | 0.427907  | 0.0144 | 0.343007  | 0.0579 |

|          |            |           |        |           |        |           |        |           |        |
|----------|------------|-----------|--------|-----------|--------|-----------|--------|-----------|--------|
| 10783805 | Psm2       | 0.117985  | 0.9872 | -0.378418 | 0.0549 | -0.422077 | 0.0120 | -0.554674 | 0.0007 |
| 10784172 | Ska3       | 0.014126  | 0.9999 | -0.802822 | 0.1553 | -1.038538 | 0.0188 | -1.431278 | 0.0008 |
| 10784346 | Sgcg       | -0.074510 | 0.9999 | 0.459037  | 0.1265 | 0.385460  | 0.1341 | 0.551060  | 0.0219 |
| 10784525 | Hmbox1     | 0.231702  | 0.7989 | 0.296288  | 0.0766 | 0.363838  | 0.0091 | 0.371953  | 0.0067 |
| 10784566 | LOC691979  | 0.082401  | 0.9999 | -0.823926 | 0.3321 | -0.952251 | 0.1252 | -1.494276 | 0.0092 |
| 10784702 | Ppp2r2a    | -0.044128 | 0.9999 | 0.080431  | 0.7519 | 0.151435  | 0.2499 | 0.241730  | 0.0395 |
| 10784719 | ---        | -0.141956 | 0.9223 | -0.316991 | 0.0275 | -0.235019 | 0.0753 | -0.311994 | 0.0131 |
| 10784729 | Cdca2      | -0.023517 | 0.9999 | -0.574063 | 0.3250 | -0.882973 | 0.0301 | -1.221841 | 0.0018 |
| 10784751 | Dock5      | -0.062363 | 0.9999 | 0.341891  | 0.2136 | 0.456107  | 0.0283 | 0.289080  | 0.2189 |
| 10784809 | Nefm       | 0.094508  | 0.9653 | 0.192353  | 0.2144 | 0.148888  | 0.2633 | 0.236486  | 0.0459 |
| 10784980 | Sorbs3     | -0.038498 | 0.9999 | -0.427039 | 0.0181 | -0.405571 | 0.0125 | -0.438245 | 0.0059 |
| 10785019 | Slc39a14   | 0.147383  | 0.9630 | 0.424034  | 0.0310 | 0.549093  | 0.0014 | 0.555761  | 0.0009 |
| 10785244 | Itm2b      | 0.246837  | 0.7989 | -0.191080 | 0.4120 | -0.238263 | 0.1406 | -0.318180 | 0.0369 |
| 10785297 | LOC691979  | 0.131566  | 0.9999 | -0.819856 | 0.3275 | -0.916672 | 0.1387 | -1.489337 | 0.0086 |
| 10785326 | Slc25a30   | 0.215950  | 0.9921 | 0.602907  | 0.1632 | 0.703817  | 0.0391 | 0.544163  | 0.1370 |
| 10785361 | RGD1310185 | 0.158012  | 0.9624 | -0.311378 | 0.1751 | -0.401504 | 0.0243 | -0.331734 | 0.0721 |
| 10785372 | Dnajc15    | -0.290846 | 0.8614 | -0.401427 | 0.1200 | -0.339153 | 0.1257 | -0.481710 | 0.0201 |
| 10785389 | Akap11     | -0.005691 | 0.9999 | 0.428213  | 0.0194 | 0.615640  | 0.0002 | 0.540250  | 0.0007 |
| 10785479 | Diaph3     | -0.078284 | 0.9999 | -0.484603 | 0.5101 | -0.788176 | 0.0849 | -1.012024 | 0.0205 |
| 10785602 | LOC686547  | 0.425750  | 0.8437 | 0.574846  | 0.0976 | 0.689818  | 0.0153 | 0.623044  | 0.0297 |
| 10785638 | Mycbp2     | 0.302627  | 0.8063 | 0.292100  | 0.2766 | 0.492713  | 0.0099 | 0.268308  | 0.2213 |
| 10785867 | Dzip1      | 0.231023  | 0.9277 | -0.321821 | 0.2818 | -0.371405 | 0.0961 | -0.455674 | 0.0341 |
| 10786023 | Gpr18      | -0.130462 | 0.9919 | -0.364916 | 0.1265 | -0.405362 | 0.0366 | -0.322657 | 0.1169 |
| 10786036 | A2ld1      | -0.203538 | 0.9199 | -0.174216 | 0.5920 | -0.361653 | 0.0487 | -0.287113 | 0.1441 |
| 10786139 | Zmiz1      | 0.281474  | 0.9001 | 0.523721  | 0.0563 | 0.389150  | 0.1171 | 0.499514  | 0.0350 |
| 10786338 | Arhgef3    | -0.343363 | 0.7312 | -0.122273 | 0.7645 | -0.044473 | 0.8937 | -0.390007 | 0.0340 |
| 10786359 | LOC679469  | 0.138995  | 0.9921 | 0.363567  | 0.1849 | 0.544485  | 0.0091 | 0.527135  | 0.0106 |
| 10786517 | ---        | 0.152617  | 0.9544 | 0.104406  | 0.7636 | 0.145068  | 0.4626 | 0.317597  | 0.0448 |
| 10786522 | Tmem110    | 0.240577  | 0.8945 | -0.207674 | 0.5377 | -0.383078 | 0.0556 | -0.558633 | 0.0032 |
| 10786532 | Mustn1     | 0.111912  | 0.9999 | -0.749874 | 0.0155 | -0.592669 | 0.0372 | -0.503146 | 0.0898 |
| 10786577 | Glit8d1    | 0.126002  | 0.9942 | -0.213481 | 0.5840 | -0.384525 | 0.0891 | -0.545628 | 0.0103 |
| 10786624 | Nt5dc2     | 0.087837  | 0.9999 | -0.088703 | 0.8627 | -0.195746 | 0.4310 | -0.420620 | 0.0360 |
| 10786710 | Btd        | -0.054278 | 0.9999 | -0.329693 | 0.2801 | -0.487482 | 0.0263 | -0.406987 | 0.0731 |
| 10786755 | Parg       | 0.198237  | 0.9451 | 0.343924  | 0.1688 | 0.535886  | 0.0053 | 0.329210  | 0.1124 |
| 10786836 | RGD1310423 | 0.113680  | 0.9983 | -0.672691 | 0.0042 | -0.589476 | 0.0065 | -0.691310 | 0.0011 |
| 10786969 | Glud1      | 0.041676  | 0.9999 | -0.223710 | 0.1548 | -0.265591 | 0.0323 | -0.405308 | 0.0007 |
| 10787005 | ---        | 0.196369  | 0.9653 | 0.165954  | 0.7525 | 0.532893  | 0.0272 | 0.262079  | 0.3745 |
| 10787017 | LOC290577  | 0.164824  | 0.9668 | 0.217442  | 0.5430 | 0.534458  | 0.0092 | 0.354682  | 0.1076 |
| 10787121 | Slc35e1    | -0.023305 | 0.9999 | 0.200268  | 0.3017 | 0.293025  | 0.0339 | 0.126887  | 0.4775 |
| 10787212 | Myo9b      | -0.009199 | 0.9999 | 0.303883  | 0.2375 | 0.452367  | 0.0170 | 0.265670  | 0.2194 |
| 10787275 | ---        | -0.080038 | 0.9999 | -0.492660 | 0.0231 | -0.513562 | 0.0077 | -0.360649 | 0.0749 |
| 10787396 | Rpl18a     | -0.008750 | 0.9999 | -0.029280 | 0.9479 | -0.165193 | 0.2952 | -0.292033 | 0.0323 |
| 10787507 | Pgpep1     | -0.005186 | 0.9999 | 0.169187  | 0.5623 | 0.362109  | 0.0297 | 0.267487  | 0.1363 |
| 10787517 | Gdf15      | -0.436202 | 0.9620 | 0.939600  | 0.0958 | 1.899980  | 0.0001 | 1.480094  | 0.0010 |
| 10787579 | Rent1      | 0.034282  | 0.9999 | 0.126404  | 0.7147 | 0.385730  | 0.0205 | 0.130436  | 0.5700 |
| 10787765 | Psd3       | 0.224468  | 0.9911 | -0.072512 | 0.9460 | -0.285883 | 0.5011 | -0.804625 | 0.0124 |
| 10787784 | Hmgb2      | 0.101988  | 0.9999 | -0.912124 | 0.0059 | -1.153861 | 0.0002 | -1.354023 | 0.0000 |



|          |            |           |        |           |        |           |        |           |        |
|----------|------------|-----------|--------|-----------|--------|-----------|--------|-----------|--------|
| 10787822 | ---        | 0.050066  | 0.9999 | 0.063688  | 0.8772 | 0.163000  | 0.3881 | 0.347798  | 0.0247 |
| 10787828 | ---        | -0.027867 | 0.9999 | 0.333331  | 0.2951 | 0.466584  | 0.0414 | 0.314827  | 0.2212 |
| 10787841 | Sc4mol     | -0.161973 | 0.9921 | 0.292637  | 0.5012 | 0.596597  | 0.0228 | 0.607863  | 0.0189 |
| 10787918 | LOC290704  | 0.012810  | 0.9999 | 0.461997  | 0.0692 | 0.318558  | 0.1733 | 0.479648  | 0.0257 |
| 10787921 | LOC290704  | 0.135951  | 0.9916 | 0.640313  | 0.0025 | 0.399394  | 0.0487 | 0.580803  | 0.0025 |
| 10787923 | LOC290704  | 0.068741  | 0.9999 | 0.258364  | 0.4294 | 0.250292  | 0.3058 | 0.454799  | 0.0303 |
| 10787925 | LOC290704  | 0.135330  | 0.9898 | 0.498987  | 0.0230 | 0.262492  | 0.2362 | 0.529839  | 0.0056 |
| 10787935 | Clcn3      | -0.014261 | 0.9999 | 0.346642  | 0.2950 | 0.676531  | 0.0036 | 0.706712  | 0.0018 |
| 10787960 | Hmgn2      | 0.103702  | 0.9999 | -0.772063 | 0.0175 | -1.068437 | 0.0003 | -1.371855 | 0.0000 |
| 10788059 | Neil3      | -0.123922 | 0.9444 | -0.287428 | 0.0374 | -0.330100 | 0.0058 | -0.383394 | 0.0010 |
| 10788086 | Odz3       | -0.036631 | 0.9999 | -0.318147 | 0.5965 | -0.430064 | 0.2530 | -0.874144 | 0.0068 |
| 10788101 | Wwc2       | -0.019872 | 0.9999 | 0.610431  | 0.0270 | 0.832558  | 0.0006 | 0.579348  | 0.0170 |
| 10788170 | Stox2      | 0.298213  | 0.8437 | 0.467701  | 0.0392 | 0.346457  | 0.0938 | 0.176768  | 0.4976 |
| 10788180 | Ccdc111    | 0.000241  | 0.9999 | -0.351004 | 0.1374 | -0.468404 | 0.0121 | -0.431841 | 0.0209 |
| 10788204 | Snx25      | -0.059323 | 0.9999 | 0.181818  | 0.6564 | 0.423192  | 0.0487 | 0.118348  | 0.7184 |
| 10788238 | Tlr3       | -0.067514 | 0.9999 | -0.290563 | 0.2811 | -0.418877 | 0.0309 | -0.528167 | 0.0048 |
| 10788246 | Cyp4v3     | 0.208577  | 0.9299 | -0.204282 | 0.5410 | -0.245659 | 0.2695 | -0.406349 | 0.0379 |
| 10788427 | Msr1       | 0.305307  | 0.8669 | -0.948267 | 0.0001 | -1.162468 | 0.0000 | -0.810003 | 0.0004 |
| 10788477 | ---        | -0.287170 | 0.7200 | -0.257911 | 0.1444 | -0.324601 | 0.0204 | -0.326430 | 0.0186 |
| 10788553 | Leprotl1   | 0.072669  | 0.9942 | 0.259147  | 0.0800 | 0.300583  | 0.0148 | 0.364119  | 0.0024 |
| 10788720 | Rab11fip1  | 0.095309  | 0.9950 | 0.408903  | 0.0316 | 0.607483  | 0.0003 | 0.692876  | 0.0000 |
| 10788728 | Brf2       | -0.027791 | 0.9999 | 0.124242  | 0.7760 | 0.334072  | 0.0957 | 0.402297  | 0.0381 |
| 10788864 | Tacc1      | 0.085464  | 0.9985 | -0.300536 | 0.1567 | -0.225755 | 0.2244 | -0.487837 | 0.0023 |
| 10789059 | Agpat6     | 0.034776  | 0.9999 | 0.179292  | 0.2938 | 0.328438  | 0.0062 | 0.087609  | 0.6122 |
| 10789143 | Slc25a15   | 0.017056  | 0.9999 | 0.399918  | 0.0275 | 0.302415  | 0.0680 | 0.176704  | 0.3725 |
| 10789152 | Ckap2      | 0.056332  | 0.9999 | -0.676387 | 0.2888 | -0.454704 | 0.4195 | -1.037807 | 0.0216 |
| 10789281 | Xkr5       | -0.032197 | 0.9999 | -0.349465 | 0.1577 | -0.574740 | 0.0028 | -0.600915 | 0.0013 |
| 10789401 | Rasa3      | -0.010057 | 0.9999 | -0.476268 | 0.0114 | -0.233454 | 0.2258 | -0.597164 | 0.0004 |
| 10789492 | Grtp1      | -0.100114 | 0.9990 | 0.114642  | 0.8079 | 0.421738  | 0.0351 | 0.152293  | 0.5814 |
| 10789498 | Grtp1      | -0.008187 | 0.9999 | 0.385404  | 0.1513 | 0.539132  | 0.0101 | 0.621990  | 0.0023 |
| 10789560 | Ankrd10    | 0.238529  | 0.9333 | 0.365359  | 0.2360 | 0.673865  | 0.0028 | 0.505314  | 0.0266 |
| 10789574 | RGD1311612 | 0.123738  | 0.9570 | -0.218009 | 0.1958 | -0.288323 | 0.0251 | -0.333797 | 0.0077 |
| 10789688 | Efnb2      | -0.455093 | 0.8669 | 0.715791  | 0.0855 | 1.114895  | 0.0012 | 0.784970  | 0.0231 |
| 10789709 | Polr3a     | -0.073672 | 0.9999 | 0.298968  | 0.2600 | 0.482625  | 0.0115 | 0.335162  | 0.1001 |
| 10789727 | Zcche24    | 0.225832  | 0.9582 | -0.855370 | 0.0005 | -1.055051 | 0.0000 | -1.140868 | 0.0000 |
| 10789732 | Dctpp1     | -0.152846 | 0.9199 | -0.077795 | 0.8090 | -0.294147 | 0.0313 | -0.207363 | 0.1660 |
| 10789783 | ---        | -0.018632 | 0.9999 | 0.419157  | 0.1238 | 0.531414  | 0.0149 | 0.514694  | 0.0179 |
| 10790023 | ---        | 0.223003  | 0.9620 | -1.224307 | 0.0000 | -1.328833 | 0.0000 | -1.330117 | 0.0000 |
| 10790096 | Nisch      | 0.081593  | 0.9950 | 0.176090  | 0.4358 | 0.252803  | 0.0930 | 0.316167  | 0.0286 |
| 10790216 | Sh3bp5     | -0.121416 | 0.9620 | -0.299427 | 0.0458 | -0.237169 | 0.0776 | -0.343692 | 0.0066 |
| 10790401 | RGD1564142 | -0.089708 | 0.9942 | -0.296498 | 0.1189 | -0.310202 | 0.0475 | -0.437167 | 0.0033 |
| 10790481 | Bmpr1a     | -0.066554 | 0.9999 | 0.383566  | 0.1708 | 0.431353  | 0.0515 | 0.536125  | 0.0120 |
| 10790525 | Rpl38      | -0.128427 | 0.9451 | -0.155737 | 0.4275 | -0.309230 | 0.0131 | -0.161893 | 0.2702 |
| 10790542 | Gcap14     | 0.007223  | 0.9999 | 0.468741  | 0.1000 | 0.604600  | 0.0093 | 0.580132  | 0.0117 |
| 10790670 | Klf2       | 0.144768  | 0.9998 | -0.677320 | 0.0598 | -0.709454 | 0.0212 | -0.794674 | 0.0082 |
| 10790954 | Lsm4       | -0.086520 | 0.9917 | -0.176209 | 0.3429 | -0.258940 | 0.0445 | -0.253832 | 0.0505 |
| 10790966 | Isyna1     | 0.219315  | 0.9921 | 0.712854  | 0.0887 | 1.092164  | 0.0015 | 1.308872  | 0.0001 |

|          |            |           |        |           |        |           |        |           |        |
|----------|------------|-----------|--------|-----------|--------|-----------|--------|-----------|--------|
| 10790978 | Eil        | 0.208488  | 0.8820 | 0.389922  | 0.0367 | 0.297274  | 0.0793 | 0.394768  | 0.0143 |
| 10791011 | Gdf1       | -0.061452 | 0.9999 | -0.400157 | 0.0355 | -0.285398 | 0.1024 | -0.570109 | 0.0005 |
| 10791456 | ---        | -0.071753 | 0.9999 | 0.374537  | 0.1996 | 0.484510  | 0.0297 | 0.457051  | 0.0421 |
| 10791497 | Hmgb2      | -0.289491 | 0.9247 | -0.425127 | 0.2298 | -0.548274 | 0.0391 | -0.357153 | 0.2364 |
| 10791565 | Vegfc      | 0.156999  | 0.9921 | -0.532931 | 0.0852 | -0.389412 | 0.1637 | -0.681327 | 0.0068 |
| 10791604 | Dctd       | 0.064305  | 0.9999 | -0.412209 | 0.0609 | -0.552916 | 0.0030 | -0.610798 | 0.0008 |
| 10791661 | Mlf1ip     | -0.059076 | 0.9999 | -0.541839 | 0.2344 | -0.721085 | 0.0342 | -0.728841 | 0.0315 |
| 10791740 | Pdlim3     | -0.122637 | 0.9999 | 0.710318  | 0.0488 | 0.604047  | 0.0572 | 0.556429  | 0.0890 |
| 10791779 | ---        | 0.206462  | 0.9999 | 0.860719  | 0.1311 | 1.432028  | 0.0016 | 1.396358  | 0.0016 |
| 10791786 | Fat1       | 0.024505  | 0.9999 | 0.220470  | 0.6261 | 0.381998  | 0.1370 | 0.486490  | 0.0472 |
| 10791893 | Pdgfr1     | -0.115110 | 0.9942 | -0.146882 | 0.7313 | -0.672554 | 0.0007 | -0.725765 | 0.0002 |
| 10791950 | Efha2      | 0.128964  | 0.9998 | 0.457673  | 0.1986 | 0.865444  | 0.0012 | 0.620821  | 0.0209 |
| 10792040 | Tmem66     | -0.068709 | 0.9999 | 0.296971  | 0.1409 | 0.363144  | 0.0237 | 0.317485  | 0.0528 |
| 10792076 | Ppp2cb     | -0.110530 | 0.9624 | 0.292992  | 0.0461 | 0.434855  | 0.0006 | 0.408658  | 0.0009 |
| 10792101 | Purg       | 0.061922  | 0.9999 | 0.485816  | 0.0318 | 0.569892  | 0.0039 | 0.350500  | 0.0975 |
| 10792104 | Mak16      | -0.010128 | 0.9999 | 0.183649  | 0.3269 | 0.359573  | 0.0051 | 0.231585  | 0.0902 |
| 10792124 | Dusp26     | -0.171213 | 0.9498 | 0.397036  | 0.0410 | 0.377814  | 0.0263 | 0.545528  | 0.0009 |
| 10792251 | Star       | 0.009647  | 0.9999 | 0.813514  | 0.0016 | 0.855904  | 0.0004 | 0.969029  | 0.0001 |
| 10792278 | Whsc111    | 0.182962  | 0.9310 | 0.218000  | 0.4218 | 0.448497  | 0.0095 | 0.324063  | 0.0741 |
| 10792344 | Sfrp1      | -0.277172 | 0.9619 | 0.506683  | 0.1861 | 0.482909  | 0.1193 | 0.713819  | 0.0136 |
| 10792421 | Plat       | 0.131941  | 0.9999 | -0.286488 | 0.7592 | -0.173896 | 0.7985 | -0.928747 | 0.0272 |
| 10792441 | Slc20a2    | 0.054096  | 0.9999 | 0.310689  | 0.4452 | 0.448973  | 0.0948 | 0.583721  | 0.0227 |
| 10792592 | Agpat5     | -0.156817 | 0.9819 | 0.223998  | 0.5274 | 0.260251  | 0.2791 | 0.486095  | 0.0187 |
| 10792621 | Myom2      | 0.104875  | 0.9999 | -1.204492 | 0.0922 | -1.471793 | 0.0122 | -2.306428 | 0.0001 |
| 10792676 | Cln8       | -0.000729 | 0.9999 | 0.540256  | 0.0353 | 0.608538  | 0.0063 | 0.583423  | 0.0080 |
| 10792762 | Tmco3      | 0.033710  | 0.9999 | 0.449751  | 0.0046 | 0.416795  | 0.0044 | 0.639519  | 0.0000 |
| 10792913 | Arhgef7    | -0.185723 | 0.9171 | 0.455938  | 0.0109 | 0.486565  | 0.0027 | 0.476623  | 0.0026 |
| 10792937 | Ing1       | 0.097647  | 0.9921 | 0.129883  | 0.6831 | 0.330756  | 0.0403 | 0.247336  | 0.1566 |
| 10793317 | Pols       | -0.008024 | 0.9999 | 0.301420  | 0.1827 | 0.460871  | 0.0075 | 0.370857  | 0.0341 |
| 10793365 | Psme2      | 0.050287  | 0.9999 | -0.521397 | 0.0108 | -0.623311 | 0.0008 | -0.562960 | 0.0018 |
| 10793467 | LOC498685  | -0.062143 | 0.9999 | 0.404475  | 0.0671 | 0.401501  | 0.0338 | 0.205922  | 0.3711 |
| 10793528 | Ptch1      | 0.038810  | 0.9999 | 0.319198  | 0.1037 | 0.459988  | 0.0038 | 0.567071  | 0.0003 |
| 10793675 | Ctla2a     | 0.584573  | 0.8993 | -0.919555 | 0.1273 | -0.902221 | 0.0708 | -1.033362 | 0.0341 |
| 10793748 | LOC680692  | 0.061780  | 0.9972 | 0.304310  | 0.0159 | 0.308812  | 0.0065 | 0.209765  | 0.0802 |
| 10794084 | Rab24      | 0.165798  | 0.9709 | 0.350878  | 0.2085 | 0.608043  | 0.0036 | 0.509063  | 0.0144 |
| 10794099 | Uimc1      | 0.053706  | 0.9999 | 0.308346  | 0.0922 | 0.436987  | 0.0036 | 0.393691  | 0.0078 |
| 10794116 | Hk3        | 0.412736  | 0.4507 | -0.509651 | 0.0059 | -0.524971 | 0.0020 | -0.551913 | 0.0009 |
| 10794320 | ---        | -0.037882 | 0.9999 | -0.488512 | 0.2196 | -0.591789 | 0.0513 | -0.663547 | 0.0257 |
| 10794511 | Nup153     | 0.055594  | 0.9999 | 0.279868  | 0.2154 | 0.533896  | 0.0015 | 0.473632  | 0.0039 |
| 10794573 | Gfod1      | -0.075793 | 0.9999 | 0.443599  | 0.1592 | 0.827697  | 0.0007 | 0.646468  | 0.0073 |
| 10794599 | Nedd9      | -0.005553 | 0.9999 | 0.933984  | 0.0040 | 1.135600  | 0.0002 | 1.229515  | 0.0000 |
| 10794691 | ---        | 0.046260  | 0.9999 | -0.217174 | 0.5460 | -0.456270 | 0.0290 | -0.523802 | 0.0101 |
| 10794721 | Ssr1       | -0.033058 | 0.9999 | -0.149052 | 0.5706 | -0.186271 | 0.2736 | -0.336774 | 0.0222 |
| 10794800 | RGD1311307 | -0.727886 | 0.7200 | 0.653553  | 0.1802 | 0.860206  | 0.0223 | 0.757952  | 0.0476 |
| 10794836 | Serpinb6a  | 0.048968  | 0.9999 | 0.295943  | 0.3094 | 0.462066  | 0.0240 | 0.329195  | 0.1368 |
| 10795027 | Pr18a9     | -0.185131 | 0.7312 | -0.280705 | 0.0102 | -0.199681 | 0.0504 | -0.219329 | 0.0288 |
| 10795112 | Gmnn       | -0.103508 | 0.9999 | -0.320418 | 0.3723 | -0.454760 | 0.0653 | -0.500042 | 0.0399 |

|          |            |           |        |           |        |           |        |           |        |
|----------|------------|-----------|--------|-----------|--------|-----------|--------|-----------|--------|
| 10795120 | Lrrc16a    | -0.010295 | 0.9999 | 0.451039  | 0.0821 | 0.488859  | 0.0248 | 0.619525  | 0.0031 |
| 10795189 | Hist1h2bh  | 0.011760  | 0.9999 | -0.353615 | 0.3433 | -0.594450 | 0.0198 | -0.498687 | 0.0568 |
| 10795194 | ---        | -0.008993 | 0.9999 | -0.394020 | 0.0403 | -0.424920 | 0.0106 | -0.374997 | 0.0249 |
| 10795196 | RGD1564767 | 0.148482  | 0.9999 | -0.535320 | 0.4008 | -0.747009 | 0.0844 | -1.002267 | 0.0148 |
| 10795198 | ---        | 0.041008  | 0.9999 | -0.821831 | 0.2818 | -1.023717 | 0.0680 | -1.527003 | 0.0039 |
| 10795203 | Hist1h1a   | 0.218519  | 0.9998 | -1.063435 | 0.0489 | -1.502121 | 0.0011 | -1.611869 | 0.0004 |
| 10795231 | Hist1h2bl  | 0.008216  | 0.9999 | -0.572999 | 0.2721 | -0.822315 | 0.0293 | -1.040676 | 0.0041 |
| 10795260 | ---        | 0.159251  | 0.9990 | -0.530300 | 0.2298 | -0.569023 | 0.0962 | -0.806767 | 0.0122 |
| 10795265 | LOC682649  | -0.025147 | 0.9999 | -0.610533 | 0.0663 | -0.774153 | 0.0056 | -0.978191 | 0.0004 |
| 10795280 | ---        | 0.047850  | 0.9999 | -0.551154 | 0.1908 | -0.918738 | 0.0039 | -1.044886 | 0.0008 |
| 10795282 | Hist1h2bf  | -0.111546 | 0.9999 | -0.635762 | 0.0313 | -0.640203 | 0.0132 | -0.857054 | 0.0007 |
| 10795286 | ---        | 0.177683  | 0.9582 | -0.309744 | 0.2065 | -0.417440 | 0.0248 | -0.403362 | 0.0300 |
| 10795289 | ---        | -0.131318 | 0.9999 | -0.388603 | 0.4012 | -0.652155 | 0.0325 | -0.581560 | 0.0624 |
| 10795291 | Hist1h1b   | 0.147377  | 0.9999 | -0.932949 | 0.0958 | -1.225378 | 0.0074 | -1.413606 | 0.0015 |
| 10795295 | ---        | 0.160615  | 0.9999 | -0.696951 | 0.1675 | -0.795345 | 0.0463 | -1.163801 | 0.0021 |
| 10795297 | Hist1h4b   | 0.031820  | 0.9999 | -0.556197 | 0.1662 | -0.922860 | 0.0028 | -1.044469 | 0.0006 |
| 10795422 | Rala       | -0.159021 | 0.9544 | -0.252278 | 0.2544 | -0.238003 | 0.1740 | -0.353684 | 0.0283 |
| 10795427 | Cdc2l5     | 0.020391  | 0.9999 | 0.088587  | 0.8198 | 0.320582  | 0.0492 | 0.164732  | 0.4138 |
| 10795444 | RGD1308114 | 0.020789  | 0.9999 | -0.235137 | 0.1146 | -0.359772 | 0.0027 | -0.324288 | 0.0058 |
| 10795528 | Tbce       | 0.101816  | 0.9981 | 0.214956  | 0.5107 | 0.459337  | 0.0186 | 0.377906  | 0.0603 |
| 10795616 | Crem       | 0.152897  | 0.9921 | 0.504987  | 0.0800 | 0.422793  | 0.0938 | 0.512203  | 0.0353 |
| 10795650 | RGD1562407 | 0.092484  | 0.9978 | 0.226643  | 0.4030 | 0.354729  | 0.0487 | 0.181594  | 0.4151 |
| 10795679 | Gpr137b    | 0.322741  | 0.7200 | -0.348957 | 0.0730 | -0.389758 | 0.0172 | -0.281850 | 0.1063 |
| 10795760 | Mtr        | 0.121260  | 0.9968 | 0.443209  | 0.0994 | 0.675966  | 0.0020 | 0.484764  | 0.0287 |
| 10796220 | Gata3      | 0.050453  | 0.9999 | -0.678275 | 0.0001 | -0.689499 | 0.0000 | -0.829017 | 0.0000 |
| 10796226 | ---        | 0.195691  | 0.9310 | -0.636455 | 0.0012 | -0.665561 | 0.0003 | -0.728712 | 0.0001 |
| 10796234 | Cugbp2     | 0.032883  | 0.9999 | 0.347856  | 0.3010 | 0.486215  | 0.0434 | 0.294286  | 0.2949 |
| 10796347 | Mcm10      | 0.218064  | 0.9310 | -0.442688 | 0.0692 | -0.586892 | 0.0040 | -0.558836 | 0.0053 |
| 10796381 | Prpf18     | 0.192575  | 0.9653 | 0.235895  | 0.5744 | 0.523821  | 0.0270 | 0.232318  | 0.4402 |
| 10796411 | Mt1a       | 0.188419  | 0.9999 | -0.521826 | 0.4967 | -0.995168 | 0.0329 | -0.666861 | 0.2000 |
| 10796432 | Rpp38      | -0.138228 | 0.9921 | 0.308875  | 0.3167 | 0.454919  | 0.0363 | 0.262880  | 0.3029 |
| 10796440 | Pter       | -0.353456 | 0.9038 | -0.423897 | 0.3350 | -0.497706 | 0.1194 | -0.620208 | 0.0439 |
| 10796455 | Stam       | -0.031091 | 0.9999 | 0.363321  | 0.2211 | 0.496675  | 0.0259 | 0.468182  | 0.0363 |
| 10796476 | Mrc1       | 0.639013  | 0.7200 | -1.525909 | 0.0000 | -1.950210 | 0.0000 | -1.942858 | 0.0000 |
| 10796564 | Plxdc2     | 0.371210  | 0.9010 | -0.123565 | 0.8828 | -0.460834 | 0.1738 | -0.722639 | 0.0193 |
| 10796985 | ---        | 0.146709  | 0.9999 | 0.372686  | 0.7251 | 1.121601  | 0.0270 | 0.537708  | 0.3897 |
| 10796989 | ---        | 0.140233  | 0.9999 | 0.427583  | 0.6309 | 1.016078  | 0.0325 | 0.858809  | 0.0817 |
| 10797032 | Dapk1      | 0.342337  | 0.8614 | -0.473014 | 0.1182 | -0.494019 | 0.0474 | -0.381110 | 0.1559 |
| 10797062 | Mak10      | -0.000005 | 1.0000 | 0.158274  | 0.6119 | 0.345955  | 0.0439 | 0.351601  | 0.0402 |
| 10797169 | Rplp1      | -0.056150 | 0.9942 | -0.183030 | 0.1255 | -0.194960 | 0.0458 | -0.165460 | 0.1054 |
| 10797232 | Prr7       | -0.154075 | 0.9624 | -0.255760 | 0.3220 | -0.380049 | 0.0360 | -0.246920 | 0.2290 |
| 10797473 | Rpl35a     | -0.023414 | 0.9999 | -0.099661 | 0.8443 | -0.483822 | 0.0166 | -0.345165 | 0.1105 |
| 10797566 | S1pr3      | 0.180352  | 0.9999 | -0.845243 | 0.0778 | -0.922732 | 0.0221 | -1.156132 | 0.0029 |
| 10797597 | Iars       | -0.214153 | 0.9624 | 0.441345  | 0.1599 | 0.547915  | 0.0266 | 0.536462  | 0.0295 |
| 10797648 | Ogn        | 0.485534  | 0.8869 | -0.991447 | 0.0195 | -1.339887 | 0.0004 | -1.569420 | 0.0000 |
| 10797657 | Omd        | 0.039863  | 0.9999 | -0.157066 | 0.2334 | -0.227031 | 0.0202 | -0.215808 | 0.0272 |
| 10797671 | ---        | 0.100309  | 0.9999 | -0.436393 | 0.3650 | -0.992161 | 0.0020 | -1.094514 | 0.0005 |

|          |                    |           |        |           |        |           |        |           |        |
|----------|--------------------|-----------|--------|-----------|--------|-----------|--------|-----------|--------|
| 10797796 | Myliip             | -0.088602 | 0.9999 | -0.118089 | 0.7977 | -0.263729 | 0.2326 | -0.413215 | 0.0370 |
| 10797811 | Cd83               | -0.052149 | 0.9999 | -0.538436 | 0.0047 | -0.617319 | 0.0005 | -0.495186 | 0.0040 |
| 10797949 | Bmp6               | 0.213135  | 0.9998 | -0.560594 | 0.4288 | -0.996806 | 0.0290 | -1.290691 | 0.0033 |
| 10798027 | Ly86               | 0.123577  | 0.9624 | -0.558134 | 0.0002 | -0.690009 | 0.0000 | -0.607784 | 0.0000 |
| 10798037 | Fars2              | 0.244302  | 0.9444 | -0.226927 | 0.6010 | -0.441833 | 0.0716 | -0.553204 | 0.0191 |
| 10798074 | Prpf4b             | 0.111464  | 0.9999 | 0.280309  | 0.5237 | 0.557558  | 0.0332 | 0.323538  | 0.2913 |
| 10798135 | Serpinb9           | 0.096879  | 0.9999 | -0.929846 | 0.0628 | -1.232998 | 0.0034 | -0.946991 | 0.0260 |
| 10798194 | Agtr1a             | 0.452657  | 0.7289 | -0.482928 | 0.0958 | -0.596115 | 0.0120 | -0.542248 | 0.0227 |
| 10798199 | Mboat1             | 0.252031  | 0.8489 | -0.138694 | 0.6814 | -0.464115 | 0.0057 | -0.392319 | 0.0198 |
| 10798386 | LOC498750          | 0.163647  | 0.9620 | -0.158244 | 0.6351 | -0.472049 | 0.0066 | -0.242080 | 0.2269 |
| 10798436 | Hist1h2aa          | -0.254009 | 0.8945 | -0.428271 | 0.0817 | -0.491911 | 0.0165 | -0.601798 | 0.0025 |
| 10798442 | LOC679840          | -0.104980 | 0.9999 | -0.623664 | 0.1572 | -0.860636 | 0.0120 | -0.809843 | 0.0178 |
| 10798455 | Hist1h2ail         | 0.036560  | 0.9999 | -0.666502 | 0.0708 | -0.788293 | 0.0108 | -0.976785 | 0.0012 |
| 10798457 | ---                | 0.117925  | 0.9999 | -0.888909 | 0.1460 | -1.111926 | 0.0217 | -1.264090 | 0.0074 |
| 10798459 | ---                | 0.219514  | 0.9999 | -0.934558 | 0.2413 | -1.001297 | 0.1034 | -1.615968 | 0.0046 |
| 10798461 | Hist1h4b           | 0.015989  | 0.9999 | -0.549095 | 0.1665 | -0.870075 | 0.0044 | -0.964887 | 0.0012 |
| 10798463 | ---                | -0.045117 | 0.9999 | -0.257733 | 0.4288 | -0.384667 | 0.0741 | -0.489417 | 0.0179 |
| 10798465 | ---                | -0.056867 | 0.9999 | -0.601257 | 0.2721 | -0.938235 | 0.0167 | -0.553338 | 0.2157 |
| 10798469 | Uhmk1              | -0.041658 | 0.9999 | 0.106791  | 0.8212 | 0.429582  | 0.0278 | 0.239056  | 0.2976 |
| 10798471 | Taf5l              | -0.086309 | 0.9931 | 0.093620  | 0.7788 | 0.116060  | 0.5514 | 0.338736  | 0.0193 |
| 10798475 | Hist1h2bc          | 0.042086  | 0.9999 | -0.498319 | 0.2981 | -0.733924 | 0.0316 | -0.680675 | 0.0490 |
| 10798488 | Hist1h2bc          | 0.040103  | 0.9999 | -0.705316 | 0.0937 | -0.959350 | 0.0053 | -1.217115 | 0.0004 |
| 10798490 | Hist1h4b           | 0.050100  | 0.9999 | -0.537277 | 0.1774 | -0.891634 | 0.0034 | -1.019668 | 0.0006 |
| 10798492 | ---                | 0.011755  | 0.9999 | -0.452240 | 0.2298 | -0.730061 | 0.0085 | -0.857932 | 0.0015 |
| 10798494 | st1h2bn // Hist1h2 | 0.011164  | 0.9999 | -0.672220 | 0.0958 | -0.915620 | 0.0055 | -1.069477 | 0.0009 |
| 10798497 | Hist1h2bl          | 0.028740  | 0.9999 | -0.684168 | 0.1016 | -0.978427 | 0.0039 | -1.112369 | 0.0008 |
| 10798499 | Hist1h4b           | 0.044913  | 0.9999 | -0.532144 | 0.2145 | -0.898800 | 0.0048 | -0.983944 | 0.0016 |
| 10798501 | Hist1h2bm          | 0.123231  | 0.9921 | -0.298811 | 0.3107 | -0.538973 | 0.0085 | -0.522619 | 0.0098 |
| 10798505 | ---                | 0.095678  | 0.9999 | -0.787289 | 0.1730 | -0.927174 | 0.0406 | -1.501831 | 0.0006 |
| 10798507 | Hist1h2ak          | -0.033315 | 0.9999 | -0.833396 | 0.1170 | -1.194627 | 0.0050 | -1.337249 | 0.0013 |
| 10798513 | Znf307             | -0.005439 | 0.9999 | -0.201516 | 0.4383 | -0.391223 | 0.0179 | -0.248977 | 0.1750 |
| 10798610 | Sfrp4              | -0.056396 | 0.9999 | 1.476397  | 0.0000 | 1.002607  | 0.0004 | 1.072981  | 0.0001 |
| 10798702 | Inhba              | -0.280778 | 0.9921 | 1.024279  | 0.0280 | 1.064360  | 0.0096 | 1.038200  | 0.0106 |
| 10798706 | Gli3               | 0.229943  | 0.9574 | -0.197494 | 0.6747 | -0.469967 | 0.0535 | -0.524318 | 0.0281 |
| 10798794 | Svil               | 0.004064  | 0.9999 | 0.506664  | 0.1708 | 0.577364  | 0.0478 | 0.706622  | 0.0122 |
| 10798828 | RGD1562037         | 0.003323  | 0.9999 | 0.528221  | 0.1155 | 0.439690  | 0.1283 | 0.618711  | 0.0223 |
| 10799084 | ---                | -0.125344 | 0.9999 | -0.725326 | 0.2077 | -0.746292 | 0.1009 | -1.329410 | 0.0016 |
| 10799087 | Heatr1             | -0.040490 | 0.9999 | 0.179256  | 0.6850 | 0.518453  | 0.0189 | 0.182077  | 0.5441 |
| 10799357 | Akr1cl1            | 0.582923  | 0.8210 | -1.123203 | 0.0055 | -1.314808 | 0.0004 | -1.081134 | 0.0029 |
| 10799532 | Upf2               | 0.228089  | 0.9608 | 0.466398  | 0.1173 | 0.735545  | 0.0021 | 0.583338  | 0.0142 |
| 10799671 | LOC684862          | 0.105705  | 0.9982 | -0.141732 | 0.7494 | -0.225757 | 0.3529 | -0.429071 | 0.0363 |
| 10799684 | RGD1564327         | 0.423299  | 0.8934 | -0.291062 | 0.6583 | -1.057216 | 0.0017 | -0.573963 | 0.1142 |
| 10799848 | Neb1               | 0.241681  | 0.9843 | -0.943963 | 0.0087 | -0.910319 | 0.0054 | -0.915015 | 0.0043 |
| 10799909 | Pip4k2a            | -0.065738 | 0.9999 | -0.098309 | 0.8729 | -0.260050 | 0.3500 | -0.524037 | 0.0242 |
| 10799914 | ---                | -0.080286 | 0.9999 | -0.298931 | 0.3489 | -0.558437 | 0.0097 | -0.551766 | 0.0097 |
| 10799942 | Arhgap21           | 0.079929  | 0.9999 | 0.801222  | 0.0052 | 0.968806  | 0.0003 | 1.164154  | 0.0000 |
| 10799985 | Rps8               | -0.003533 | 0.9999 | -0.164767 | 0.5387 | -0.181423 | 0.3219 | -0.313903 | 0.0482 |

|          |            |           |        |           |        |           |        |           |        |
|----------|------------|-----------|--------|-----------|--------|-----------|--------|-----------|--------|
| 10799999 | Mastl      | 0.012426  | 0.9999 | -0.798929 | 0.1889 | -0.659536 | 0.1998 | -1.305812 | 0.0037 |
| 10800088 | Colec12    | 0.395214  | 0.8544 | -0.672587 | 0.0275 | -0.658292 | 0.0147 | -0.815681 | 0.0018 |
| 10800122 | RGD1566021 | 0.038334  | 0.9999 | -0.138312 | 0.5910 | -0.140194 | 0.4325 | -0.339783 | 0.0162 |
| 10800142 | Mib1       | 0.192604  | 0.9010 | 0.223963  | 0.3480 | 0.559008  | 0.0005 | 0.143761  | 0.5037 |
| 10800189 | Cables1    | -0.053803 | 0.9999 | 0.372831  | 0.5535 | 0.772038  | 0.0335 | 0.466239  | 0.2673 |
| 10800216 | RGD1311805 | -0.051747 | 0.9999 | 0.231345  | 0.2614 | 0.331616  | 0.0270 | 0.250452  | 0.1169 |
| 10800337 | Dmtf1      | 0.044080  | 0.9999 | 0.348191  | 0.1037 | 0.588892  | 0.0007 | 0.367851  | 0.0377 |
| 10800657 | Ammecr11   | -0.032589 | 0.9999 | 0.307325  | 0.2371 | 0.516010  | 0.0067 | 0.463124  | 0.0145 |
| 10800696 | Lims2      | -0.057994 | 0.9999 | -0.370130 | 0.5299 | -0.735437 | 0.0350 | -0.671117 | 0.0590 |
| 10800744 | Erc3       | 0.028075  | 0.9999 | 0.315969  | 0.3137 | 0.443043  | 0.0470 | 0.456575  | 0.0396 |
| 10800844 | Apc        | 0.174748  | 0.9630 | 0.289956  | 0.3331 | 0.570018  | 0.0053 | 0.496897  | 0.0148 |
| 10800891 | Kif20a     | 0.079402  | 0.9999 | -1.181272 | 0.0619 | -1.399174 | 0.0089 | -1.792524 | 0.0006 |
| 10800919 | Egr1       | -0.615455 | 0.9136 | -1.100727 | 0.0905 | -1.238231 | 0.0219 | -0.965850 | 0.0887 |
| 10801135 | ---        | -0.522256 | 0.8437 | -0.814257 | 0.0435 | -1.098646 | 0.0015 | -1.080037 | 0.0014 |
| 10801258 | ---        | 0.202973  | 0.9653 | 0.397644  | 0.2397 | 0.536274  | 0.0328 | 0.414473  | 0.1218 |
| 10801262 | Rel2       | -0.123859 | 0.9925 | 0.246891  | 0.4597 | 0.304609  | 0.1814 | 0.451704  | 0.0309 |
| 10801271 | RGD735029  | -0.030733 | 0.9999 | -0.262276 | 0.3007 | -0.401503 | 0.0255 | -0.364484 | 0.0455 |
| 10801290 | Ndfip1     | 0.111668  | 0.9852 | 0.187527  | 0.4412 | 0.351671  | 0.0235 | 0.265793  | 0.1063 |
| 10801584 | Commd10    | -0.038994 | 0.9999 | -0.152706 | 0.7062 | -0.421865 | 0.0342 | -0.474199 | 0.0150 |
| 10801683 | Prr16      | 0.328937  | 0.9010 | -0.836107 | 0.0049 | -0.463147 | 0.1118 | -0.589234 | 0.0343 |
| 10801821 | Lmnb1      | -0.041010 | 0.9999 | -0.752213 | 0.0138 | -0.708593 | 0.0101 | -0.871538 | 0.0012 |
| 10801859 | Prrc1      | 0.078603  | 0.9990 | -0.024499 | 0.9674 | -0.222933 | 0.2113 | -0.429598 | 0.0059 |
| 10801884 | Slc12a2    | 0.049695  | 0.9999 | 0.374953  | 0.2157 | 0.737438  | 0.0011 | 0.752164  | 0.0007 |
| 10801967 | Chsy3      | -0.122924 | 0.9968 | 0.587887  | 0.0158 | 0.415075  | 0.0682 | 0.524572  | 0.0168 |
| 10801973 | RGD1309362 | 0.670212  | 0.7016 | -0.473304 | 0.2796 | -0.692345 | 0.0281 | -0.610496 | 0.0579 |
| 10801975 | MGC108823  | 0.134644  | 0.9867 | -0.319390 | 0.2032 | -0.449780 | 0.0177 | -0.426399 | 0.0246 |
| 10802007 | Rps14      | -0.091307 | 0.9999 | -0.162037 | 0.6794 | -0.418092 | 0.0358 | -0.370372 | 0.0709 |
| 10802040 | Pdgfrb     | 0.174427  | 0.9977 | -0.455208 | 0.3460 | -0.581682 | 0.0905 | -1.142157 | 0.0004 |
| 10802065 | Csf1r      | 0.376592  | 0.9620 | -1.042730 | 0.0268 | -1.201481 | 0.0037 | -1.337246 | 0.0009 |
| 10802130 | Il17b      | -0.213601 | 0.8774 | -0.236844 | 0.3249 | -0.098023 | 0.6887 | -0.360500 | 0.0315 |
| 10802191 | Wdr7       | 0.190145  | 0.9625 | 0.328396  | 0.2951 | 0.473341  | 0.0350 | 0.362026  | 0.1323 |
| 10802274 | Malt1      | -0.074335 | 0.9999 | 0.475228  | 0.2589 | 0.691767  | 0.0238 | 0.785409  | 0.0084 |
| 10802782 | Pias2      | 0.154915  | 0.9620 | 0.206547  | 0.4407 | 0.309273  | 0.0797 | 0.347668  | 0.0446 |
| 10802884 | RGD1306286 | 0.156587  | 0.9620 | 0.152720  | 0.6279 | 0.381468  | 0.0231 | 0.123400  | 0.6027 |
| 10802972 | Mbp        | -0.107506 | 0.9934 | -0.302189 | 0.2124 | -0.341682 | 0.0683 | -0.391767 | 0.0326 |
| 10803017 | Cyb5a      | 0.184871  | 0.9921 | -0.607131 | 0.0592 | -0.749373 | 0.0059 | -0.790454 | 0.0029 |
| 10803238 | Cdig2      | 0.280676  | 0.8614 | 0.266960  | 0.3971 | 0.591891  | 0.0038 | 0.258985  | 0.2877 |
| 10803323 | Cdh2       | 0.095767  | 0.9934 | 0.289687  | 0.1660 | 0.382073  | 0.0187 | 0.472090  | 0.0026 |
| 10803440 | ---        | -0.038911 | 0.9999 | 0.594577  | 0.0241 | 0.485085  | 0.0423 | 0.518037  | 0.0284 |
| 10803598 | ---        | 0.031676  | 0.9999 | 0.078091  | 0.7075 | 0.223050  | 0.0286 | 0.168442  | 0.1213 |
| 10803673 | LOC498836  | -0.008090 | 0.9999 | -0.220535 | 0.0378 | -0.007882 | 0.9676 | 0.119048  | 0.2733 |
| 10803692 | Nrep       | 0.089620  | 0.9999 | 0.725707  | 0.0114 | 0.666653  | 0.0105 | 0.627377  | 0.0155 |
| 10804159 | ---        | -0.360258 | 0.7200 | -0.309016 | 0.2022 | -0.401539 | 0.0296 | -0.231640 | 0.2834 |
| 10804225 | Ppp2r2b    | 0.178506  | 0.9999 | -0.950675 | 0.0455 | -1.194946 | 0.0034 | -1.152585 | 0.0038 |
| 10804319 | Mcc        | 0.130711  | 0.9921 | 0.229919  | 0.4816 | 0.491470  | 0.0129 | 0.166377  | 0.5356 |
| 10804463 | Lox        | -0.153691 | 0.9999 | 1.124456  | 0.0377 | 0.940826  | 0.0513 | 0.852720  | 0.0861 |
| 10804480 | Ppic       | 0.091609  | 0.9999 | -0.271473 | 0.4288 | -0.480992 | 0.0295 | -0.488283 | 0.0261 |

|          |            |           |        |           |        |           |        |           |        |
|----------|------------|-----------|--------|-----------|--------|-----------|--------|-----------|--------|
| 10804486 | Cep120     | 0.086222  | 0.9999 | 0.364751  | 0.2309 | 0.519292  | 0.0217 | 0.533444  | 0.0170 |
| 10804651 | LOC361335  | 0.017217  | 0.9999 | 0.199291  | 0.5531 | 0.448354  | 0.0198 | 0.273886  | 0.2074 |
| 10804721 | Afap111    | 0.026904  | 0.9999 | 0.197596  | 0.6175 | 0.612670  | 0.0037 | 0.395954  | 0.0740 |
| 10804783 | Fbxo38     | 0.087303  | 0.9999 | 0.341090  | 0.2563 | 0.527493  | 0.0151 | 0.366227  | 0.1172 |
| 10804821 | Fam38b     | -0.079228 | 0.9999 | 0.710077  | 0.0448 | 0.487290  | 0.1363 | 0.155039  | 0.7526 |
| 10804964 | Mppe1      | 0.019166  | 0.9999 | 0.414548  | 0.0502 | 0.441582  | 0.0152 | 0.312509  | 0.1086 |
| 10804974 | Afg3l2     | 0.010820  | 0.9999 | 0.169302  | 0.6387 | 0.419578  | 0.0274 | 0.291819  | 0.1603 |
| 10805016 | Cep76      | -0.063820 | 0.9999 | 0.308765  | 0.3491 | 0.534222  | 0.0172 | 0.563681  | 0.0106 |
| 10805066 | LOC679578  | 0.058830  | 0.9999 | 0.741085  | 0.0170 | 0.804103  | 0.0039 | 0.712941  | 0.0099 |
| 10805077 | Rab27b     | -0.030078 | 0.9999 | -0.166804 | 0.4203 | -0.270485 | 0.0456 | -0.030985 | 0.9027 |
| 10805085 | RGD1564477 | -0.125726 | 0.9421 | -0.320560 | 0.0167 | -0.145343 | 0.3060 | -0.322302 | 0.0065 |
| 10805100 | LOC361346  | -0.120124 | 0.9999 | -0.351042 | 0.3635 | -0.366361 | 0.2044 | -0.598656 | 0.0205 |
| 10805186 | Me2        | 0.063404  | 0.9999 | -0.357502 | 0.3444 | -0.384532 | 0.1698 | -0.526116 | 0.0450 |
| 10805214 | Ska1       | 0.053146  | 0.9999 | -0.574831 | 0.2235 | -0.796624 | 0.0243 | -0.942817 | 0.0059 |
| 10805242 | Gm672      | -0.088421 | 0.9999 | 0.336008  | 0.1689 | 0.303881  | 0.1321 | 0.396270  | 0.0388 |
| 10805527 | Cndp1      | 0.134667  | 0.9310 | -0.460158 | 0.0006 | -0.476965 | 0.0002 | -0.553729 | 0.0000 |
| 10805540 | Cndp2      | 0.037318  | 0.9999 | -0.268718 | 0.2175 | -0.408663 | 0.0118 | -0.412354 | 0.0100 |
| 10805580 | ---        | -0.153047 | 0.7668 | -0.124407 | 0.3361 | -0.203993 | 0.0223 | -0.098528 | 0.3667 |
| 10805700 | Dync1li2   | 0.062090  | 0.9999 | 0.263016  | 0.2723 | 0.412237  | 0.0164 | 0.208245  | 0.3099 |
| 10805746 | Cdh11      | 0.276957  | 0.9632 | -0.559068 | 0.2026 | -0.840335 | 0.0108 | -1.201270 | 0.0002 |
| 10805765 | ---        | 0.039951  | 0.9999 | -0.247959 | 0.2030 | -0.304254 | 0.0414 | -0.340108 | 0.0200 |
| 10805814 | Cnot1      | 0.159004  | 0.9496 | 0.172777  | 0.5101 | 0.365960  | 0.0197 | 0.263408  | 0.1172 |
| 10805851 | Cnot1      | 0.163586  | 0.8210 | 0.167921  | 0.2407 | 0.276355  | 0.0082 | 0.243147  | 0.0201 |
| 10805895 | Gtl3       | 0.009790  | 0.9999 | -0.176181 | 0.5171 | -0.127510 | 0.5548 | -0.347763 | 0.0321 |
| 10805905 | ---        | 0.217550  | 0.8973 | 0.288441  | 0.2344 | 0.398231  | 0.0275 | 0.220058  | 0.3012 |
| 10806034 | Nudt21     | 0.018675  | 0.9999 | 0.100448  | 0.4981 | 0.196165  | 0.0290 | -0.044348 | 0.7576 |
| 10806122 | Hmox1      | 0.062868  | 0.9999 | 0.032430  | 0.9846 | 0.585607  | 0.2254 | 0.931038  | 0.0315 |
| 10806129 | Mcm5       | -0.037085 | 0.9999 | -0.384893 | 0.5769 | -0.690900 | 0.0859 | -1.268483 | 0.0007 |
| 10806151 | Tpst2      | -0.021646 | 0.9999 | 0.365179  | 0.0066 | 0.373770  | 0.0024 | 0.465697  | 0.0002 |
| 10806301 | ---        | 0.027380  | 0.9999 | 0.036749  | 0.9515 | 0.304783  | 0.1062 | 0.389649  | 0.0310 |
| 10806303 | Tox3       | -0.275519 | 0.9544 | 0.761008  | 0.0131 | 0.868781  | 0.0017 | 1.030797  | 0.0002 |
| 10806341 | Zfp423     | 0.171579  | 0.8997 | -0.343189 | 0.0341 | -0.310774 | 0.0302 | -0.449858 | 0.0011 |
| 10806365 | N4bp1      | 0.092350  | 0.9990 | 0.335021  | 0.1701 | 0.634087  | 0.0007 | 0.316433  | 0.1195 |
| 10806492 | ---        | -0.031372 | 0.9999 | 0.172139  | 0.3813 | 0.263177  | 0.0474 | 0.290797  | 0.0257 |
| 10806494 | LOC685424  | -0.183615 | 0.8570 | -0.174071 | 0.3591 | -0.356255 | 0.0050 | -0.243869 | 0.0659 |
| 10806522 | ---        | -0.372443 | 0.2425 | -0.314013 | 0.0458 | -0.398945 | 0.0031 | -0.333529 | 0.0127 |
| 10806709 | Zswim4     | -0.118531 | 0.9999 | 0.322623  | 0.4887 | 0.743809  | 0.0080 | 0.571056  | 0.0476 |
| 10806913 | Usp38      | 0.205305  | 0.9620 | 0.283430  | 0.4093 | 0.555083  | 0.0123 | 0.272804  | 0.3031 |
| 10806927 | Gab1       | 0.272895  | 0.8945 | 0.372294  | 0.2007 | 0.686892  | 0.0017 | 0.735816  | 0.0006 |
| 10807031 | ---        | -0.211102 | 0.4739 | -0.207800 | 0.0453 | -0.166550 | 0.0724 | -0.231273 | 0.0085 |
| 10807044 | Arhgap10   | 0.127806  | 0.9656 | -0.229946 | 0.3034 | -0.279848 | 0.0880 | -0.536932 | 0.0005 |
| 10807140 | RGD621098  | 0.238496  | 0.8614 | 0.177966  | 0.5635 | 0.473834  | 0.0061 | 0.299706  | 0.1063 |
| 10807211 | Tmem208    | 0.167071  | 0.9632 | 0.361380  | 0.1567 | 0.425518  | 0.0346 | 0.406180  | 0.0455 |
| 10807473 | Slc7a6     | -0.024742 | 0.9999 | 0.387148  | 0.1083 | 0.659188  | 0.0007 | 0.522180  | 0.0065 |
| 10807638 | Nfat5      | 0.201942  | 0.9624 | 0.321806  | 0.3544 | 0.550222  | 0.0197 | 0.426514  | 0.0848 |
| 10807656 | Wwp2       | 0.013802  | 0.9999 | -0.069330 | 0.8580 | -0.312231 | 0.0414 | -0.289498 | 0.0636 |
| 10807768 | Ap1g1      | 0.026015  | 0.9999 | 0.284562  | 0.2154 | 0.410453  | 0.0170 | 0.281643  | 0.1308 |

|          |            |           |        |           |        |           |        |           |        |
|----------|------------|-----------|--------|-----------|--------|-----------|--------|-----------|--------|
| 10807793 | ---        | 0.068722  | 0.9999 | 0.249091  | 0.2361 | 0.445579  | 0.0038 | 0.480848  | 0.0014 |
| 10807879 | ---        | -0.056534 | 0.9921 | -0.141120 | 0.2026 | -0.160727 | 0.0612 | -0.173510 | 0.0411 |
| 10807995 | Mtss11     | 0.134087  | 0.9632 | 0.473767  | 0.0059 | 0.513867  | 0.0012 | 0.848140  | 0.0000 |
| 10808034 | St3gal2    | -0.118963 | 0.9921 | 0.470712  | 0.0392 | 0.541462  | 0.0060 | 0.595372  | 0.0020 |
| 10808094 | RGD1311422 | -0.005362 | 0.9999 | 0.501015  | 0.0165 | 0.462667  | 0.0141 | 0.565317  | 0.0020 |
| 10808197 | Cenpn      | -0.033277 | 0.9999 | -0.281326 | 0.6146 | -0.360972 | 0.3072 | -0.676191 | 0.0251 |
| 10808223 | Bcml1      | -0.187950 | 0.8872 | -0.456435 | 0.0043 | -0.508118 | 0.0006 | -0.431980 | 0.0027 |
| 10808348 | Wfdc1      | -0.364775 | 0.9507 | 0.824141  | 0.0502 | 0.950120  | 0.0084 | 1.298469  | 0.0003 |
| 10808377 | Crispld2   | -0.045012 | 0.9999 | 0.670456  | 0.1175 | 0.700579  | 0.0472 | 0.612812  | 0.0947 |
| 10808461 | Banp       | 0.148725  | 0.9968 | 0.432154  | 0.2434 | 0.608889  | 0.0261 | 0.450358  | 0.1247 |
| 10808536 | Cdt1       | -0.099353 | 0.9999 | -0.258053 | 0.5607 | -0.626293 | 0.0122 | -0.783284 | 0.0013 |
| 10808603 | Cpne7      | -0.085226 | 0.9921 | -0.127028 | 0.5690 | -0.315011 | 0.0116 | -0.184543 | 0.1891 |
| 10808620 | Dpep1      | 0.029230  | 0.9999 | -1.607841 | 0.0000 | -2.118916 | 0.0000 | -2.115646 | 0.0000 |
| 10808633 | RGD1561507 | -0.339642 | 0.7262 | -0.405888 | 0.0504 | -0.359040 | 0.0487 | -0.366879 | 0.0437 |
| 10808637 | Cdk10      | 0.028475  | 0.9999 | 0.244296  | 0.3254 | 0.368330  | 0.0341 | 0.210160  | 0.3037 |
| 10808652 | Fanca      | 0.042694  | 0.9999 | 0.289102  | 0.1444 | 0.331257  | 0.0365 | 0.187173  | 0.3189 |
| 10808702 | Tubb3      | -0.177285 | 0.9539 | -0.623925 | 0.0010 | -0.699831 | 0.0001 | -0.776539 | 0.0000 |
| 10808708 | Def8       | 0.019899  | 0.9999 | 0.278233  | 0.1755 | 0.441376  | 0.0049 | 0.274400  | 0.1037 |
| 10808723 | Afg3l1     | -0.000206 | 0.9999 | -0.102089 | 0.7544 | -0.170494 | 0.3295 | -0.330086 | 0.0257 |
| 10809018 | Cmtm3      | 0.292951  | 0.8650 | -0.588348 | 0.0157 | -0.706952 | 0.0013 | -0.800311 | 0.0002 |
| 10809216 | Gpr56      | 0.276509  | 0.9624 | 0.723828  | 0.0495 | 0.895307  | 0.0044 | 1.125037  | 0.0003 |
| 10809278 | Arl2bp     | -0.019569 | 0.9999 | -0.367505 | 0.0164 | -0.624016 | 0.0000 | -0.559879 | 0.0001 |
| 10809328 | Herpud1    | 0.121426  | 0.9990 | 0.563869  | 0.0512 | 0.665879  | 0.0070 | 0.585354  | 0.0178 |
| 10809392 | Mt1a       | 0.216201  | 0.9999 | -0.484507 | 0.5687 | -0.988759 | 0.0415 | -0.678459 | 0.2112 |
| 10809411 | Ogfod1     | -0.303543 | 0.8570 | 0.185197  | 0.6517 | 0.425460  | 0.0489 | 0.324937  | 0.1655 |
| 10809524 | Lpcat2     | 0.326011  | 0.8541 | -0.485418 | 0.0627 | -0.593916 | 0.0069 | -0.590457 | 0.0064 |
| 10809540 | Mmp2       | 0.086733  | 0.9999 | -0.312513 | 0.4632 | -0.439833 | 0.1157 | -0.668283 | 0.0101 |
| 10809643 | Cyld       | 0.033964  | 0.9999 | 0.380272  | 0.2166 | 0.731283  | 0.0014 | 0.465589  | 0.0478 |
| 10809716 | Papd5      | 0.103079  | 0.9881 | 0.198897  | 0.3699 | 0.340972  | 0.0223 | 0.326198  | 0.0287 |
| 10809730 | Heatr3     | 0.007391  | 0.9999 | 0.340143  | 0.1043 | 0.352784  | 0.0422 | 0.233242  | 0.2361 |
| 10809856 | Orc6l      | -0.147020 | 0.9942 | -0.242540 | 0.5920 | -0.388809 | 0.1501 | -0.635265 | 0.0099 |
| 10809880 | ---        | -0.045977 | 0.9999 | 0.241363  | 0.2713 | 0.407307  | 0.0092 | 0.399993  | 0.0097 |
| 10809902 | ---        | -0.093076 | 0.9990 | 0.272905  | 0.2988 | 0.286665  | 0.1519 | 0.413049  | 0.0260 |
| 10809906 | RGD1562660 | -0.257983 | 0.9589 | -0.323672 | 0.4533 | -0.608463 | 0.0257 | -0.551866 | 0.0459 |
| 10809912 | Man2b1     | 0.167709  | 0.9010 | -0.301080 | 0.0747 | -0.378198 | 0.0073 | -0.463450 | 0.0008 |
| 10810029 | Dnase2a    | 0.386069  | 0.4262 | -0.354705 | 0.0549 | -0.398243 | 0.0115 | -0.397188 | 0.0107 |
| 10810069 | Trmt1      | 0.030682  | 0.9999 | 0.145347  | 0.5619 | 0.357169  | 0.0114 | 0.231556  | 0.1320 |
| 10810144 | Rrm2       | -0.043898 | 0.9999 | -1.143684 | 0.0834 | -1.127914 | 0.0439 | -2.039359 | 0.0002 |
| 10810230 | Asf1b      | 0.158901  | 0.9999 | -0.559046 | 0.3236 | -0.880966 | 0.0259 | -1.458455 | 0.0002 |
| 10810299 | Ndufb7     | -0.109895 | 0.9867 | -0.173251 | 0.5050 | -0.334811 | 0.0327 | -0.226172 | 0.1946 |
| 10810378 | Inpp4b     | 0.110554  | 0.9921 | 0.288593  | 0.1812 | 0.348639  | 0.0377 | 0.255916  | 0.1609 |
| 10810553 | B3gnt9     | 0.071764  | 0.9999 | -0.553607 | 0.0146 | -0.737677 | 0.0003 | -1.024242 | 0.0000 |
| 10810556 | Tradd      | -0.164054 | 0.9624 | -0.478681 | 0.0202 | -0.578933 | 0.0017 | -0.531300 | 0.0031 |
| 10810591 | Fhod1      | 0.131388  | 0.9819 | 0.378013  | 0.0683 | 0.393335  | 0.0258 | 0.322821  | 0.0781 |
| 10810703 | Cenpt      | 0.126028  | 0.9999 | -0.727442 | 0.1930 | -0.872812 | 0.0433 | -1.287620 | 0.0018 |
| 10810727 | Psmb10     | 0.006309  | 0.9999 | -0.353967 | 0.0751 | -0.385640 | 0.0217 | -0.369020 | 0.0279 |
| 10810743 | Slc12a4    | -0.101390 | 0.9925 | 0.388419  | 0.0497 | 0.528771  | 0.0018 | 0.452694  | 0.0065 |

|          |            |           |        |           |        |           |        |           |        |
|----------|------------|-----------|--------|-----------|--------|-----------|--------|-----------|--------|
| 10810885 | Psmid7     | 0.121927  | 0.9624 | 0.210574  | 0.2856 | 0.340130  | 0.0153 | 0.269985  | 0.0635 |
| 10811196 | Cfdp1      | 0.025283  | 0.9999 | -0.168286 | 0.5053 | -0.279573 | 0.0728 | -0.353233 | 0.0183 |
| 10811203 | RGD1559505 | 0.094710  | 0.9990 | 0.366453  | 0.1057 | 0.370014  | 0.0499 | -0.049757 | 0.8857 |
| 10811216 | Adat1      | 0.207643  | 0.9096 | 0.254955  | 0.3226 | 0.373457  | 0.0395 | 0.210828  | 0.3287 |
| 10811244 | Lsm2       | -0.066311 | 0.9999 | -0.304528 | 0.1546 | -0.394492 | 0.0184 | -0.472408 | 0.0036 |
| 10811276 | ---        | 0.102580  | 0.9936 | 0.159194  | 0.6284 | 0.361564  | 0.0410 | 0.179569  | 0.4141 |
| 10811278 | Maf        | 0.372706  | 0.7401 | -0.182129 | 0.6518 | -0.541246 | 0.0091 | -0.477069 | 0.0219 |
| 10811293 | Gesh       | -0.107292 | 0.9695 | -0.211187 | 0.2601 | -0.246771 | 0.0797 | -0.335670 | 0.0119 |
| 10811341 | Hsd17b2    | 0.133096  | 0.8872 | 0.114685  | 0.5222 | 0.203381  | 0.0611 | 0.215368  | 0.0459 |
| 10811476 | Gins2      | -0.026640 | 0.9999 | -0.251284 | 0.2612 | -0.376302 | 0.0201 | -0.409824 | 0.0098 |
| 10811560 | Mvd        | -0.087576 | 0.9968 | 0.144869  | 0.6265 | 0.352358  | 0.0269 | 0.341476  | 0.0317 |
| 10811581 | Snai3      | -0.114441 | 0.9310 | -0.079458 | 0.7317 | -0.198523 | 0.0788 | -0.239939 | 0.0279 |
| 10811708 | Ankrd11    | 0.148079  | 0.9507 | 0.309401  | 0.0778 | 0.570674  | 0.0001 | 0.444861  | 0.0018 |
| 10811747 | Spata2L    | 0.027980  | 0.9999 | 0.285232  | 0.3645 | 0.458960  | 0.0316 | 0.464699  | 0.0286 |
| 10811768 | Fanca      | 0.167995  | 0.9201 | -0.196347 | 0.3854 | -0.268074 | 0.0849 | -0.349356 | 0.0185 |
| 10811824 | Acta1      | -0.525030 | 0.9199 | -0.642213 | 0.3461 | -1.340943 | 0.0036 | -1.496820 | 0.0009 |
| 10811947 | Exoc8      | -0.056710 | 0.9999 | 0.136232  | 0.7117 | 0.385665  | 0.0316 | 0.172718  | 0.4505 |
| 10811956 | Sipal12    | 0.042299  | 0.9999 | 0.684621  | 0.0072 | 0.930251  | 0.0001 | 0.917764  | 0.0001 |
| 10812042 | ---        | 0.126867  | 0.9247 | 0.224009  | 0.1170 | 0.266034  | 0.0218 | 0.283891  | 0.0125 |
| 10812162 | Erap1      | 0.127806  | 0.9959 | -0.374376 | 0.2198 | -0.571565 | 0.0117 | -0.519256 | 0.0222 |
| 10812223 | Spata9     | 0.106373  | 0.9324 | 0.084612  | 0.6727 | 0.094865  | 0.4612 | 0.232622  | 0.0211 |
| 10812357 | ---        | 0.272084  | 0.9659 | 0.248147  | 0.7297 | 0.678433  | 0.0490 | 0.462425  | 0.2332 |
| 10812387 | ---        | -0.061706 | 0.9814 | -0.136050 | 0.2077 | -0.163509 | 0.0489 | -0.100981 | 0.2953 |
| 10812456 | Dhfr       | 0.290569  | 0.8835 | -0.304815 | 0.3728 | -0.486642 | 0.0351 | -0.547127 | 0.0156 |
| 10812515 | Arsb       | 0.271177  | 0.9102 | -0.403748 | 0.1861 | -0.430566 | 0.0753 | -0.501100 | 0.0334 |
| 10812566 | Wdr41      | 0.115879  | 0.9921 | -0.067444 | 0.8959 | -0.146464 | 0.5546 | -0.394762 | 0.0343 |
| 10812689 | Enc1       | -0.400687 | 0.9223 | 0.933118  | 0.0198 | 0.705702  | 0.0556 | 0.934918  | 0.0081 |
| 10812775 | Cd180      | 0.540343  | 0.5767 | -0.412725 | 0.1937 | -0.546016 | 0.0246 | -0.231081 | 0.4597 |
| 10812931 | Depdc1b    | -0.060778 | 0.9999 | -0.725543 | 0.0180 | -0.807481 | 0.0034 | -0.949803 | 0.0005 |
| 10813107 | Esm1       | -0.011906 | 0.9999 | 0.278326  | 0.7725 | 0.983264  | 0.0211 | 0.603805  | 0.2107 |
| 10813112 | RGD1561161 | 0.008747  | 0.9999 | 0.355255  | 0.0960 | 0.437125  | 0.0124 | 0.523086  | 0.0021 |
| 10813119 | RGD1561161 | 0.086263  | 0.9999 | 0.766638  | 0.0415 | 0.866645  | 0.0075 | 1.152179  | 0.0003 |
| 10813152 | Emb        | 0.753683  | 0.7200 | -1.310241 | 0.0005 | -1.401954 | 0.0001 | -1.337532 | 0.0002 |
| 10813236 | Sepp1      | 0.730498  | 0.2425 | -1.182670 | 0.0000 | -1.277747 | 0.0000 | -1.304834 | 0.0000 |
| 10813336 | Prkaa1     | -0.030734 | 0.9999 | 0.284930  | 0.5815 | 0.623902  | 0.0316 | 0.578661  | 0.0491 |
| 10813407 | Rictor     | 0.218176  | 0.9871 | 0.565786  | 0.1563 | 0.851801  | 0.0058 | 0.633122  | 0.0463 |
| 10813563 | Ranbp3l    | -0.143167 | 0.9964 | 0.696834  | 0.0140 | 0.838106  | 0.0010 | 0.761467  | 0.0022 |
| 10813594 | Lmbrd2     | -0.081053 | 0.9999 | 0.289512  | 0.4027 | 0.540892  | 0.0163 | 0.558629  | 0.0118 |
| 10813616 | Ugt3a2     | -0.165645 | 0.7200 | -0.081654 | 0.5964 | -0.247510 | 0.0033 | -0.165688 | 0.0577 |
| 10813670 | C1qtnf3    | -0.133600 | 0.9589 | -0.332216 | 0.0389 | -0.309963 | 0.0282 | -0.379903 | 0.0054 |
| 10813732 | Zfr        | 0.187560  | 0.9570 | 0.422431  | 0.0646 | 0.490211  | 0.0111 | 0.466903  | 0.0150 |
| 10813953 | Znf622     | -0.142803 | 0.9925 | 0.179509  | 0.7213 | 0.361831  | 0.1645 | 0.498484  | 0.0407 |
| 10813992 | LOC683212  | -0.143367 | 0.9990 | 0.852131  | 0.0044 | 1.005948  | 0.0003 | 0.799331  | 0.0030 |
| 10814098 | Dap        | 0.178343  | 0.9425 | 0.243207  | 0.3299 | 0.215630  | 0.2782 | 0.372613  | 0.0315 |
| 10814119 | Sema5a     | 0.311362  | 0.9875 | 0.838979  | 0.1359 | 0.748134  | 0.1132 | 1.068212  | 0.0160 |
| 10814286 | Fabp4      | 0.755492  | 0.8169 | -1.053847 | 0.0639 | -1.217852 | 0.0113 | -1.357086 | 0.0038 |
| 10814426 | ---        | 0.183330  | 0.9999 | 0.611913  | 0.3649 | 0.949962  | 0.0391 | 0.897995  | 0.0543 |



|          |            |           |        |           |        |           |        |           |        |
|----------|------------|-----------|--------|-----------|--------|-----------|--------|-----------|--------|
| 10814628 | ---        | 0.517502  | 0.7316 | 0.430050  | 0.2735 | 0.567657  | 0.0481 | 0.440038  | 0.1549 |
| 10814650 | Rpl22l1    | 0.019601  | 0.9999 | -0.247327 | 0.7721 | -0.743524 | 0.0537 | -0.765872 | 0.0462 |
| 10814663 | Phc3       | 0.221577  | 0.9010 | 0.325340  | 0.1836 | 0.456127  | 0.0147 | 0.576882  | 0.0015 |
| 10814703 | Terc       | -0.196101 | 0.9049 | -0.231237 | 0.3486 | -0.473555 | 0.0044 | -0.376732 | 0.0249 |
| 10814717 | Zmat3      | -0.082718 | 0.9999 | 0.443963  | 0.1257 | 0.597528  | 0.0099 | 0.509571  | 0.0294 |
| 10814726 | Pik3ca     | -0.157805 | 0.9653 | 0.772313  | 0.0001 | 0.911312  | 0.0000 | 0.790000  | 0.0000 |
| 10814795 | Usp13      | -0.054628 | 0.9999 | 0.407776  | 0.0167 | 0.539749  | 0.0005 | 0.526909  | 0.0005 |
| 10814815 | Usp13      | -0.166808 | 0.9921 | 0.427302  | 0.2534 | 0.534840  | 0.0545 | 0.554006  | 0.0457 |
| 10814858 | Atp11b     | 0.040252  | 0.9999 | 0.335877  | 0.1984 | 0.477527  | 0.0156 | 0.428921  | 0.0313 |
| 10814894 | Acad9      | -0.121752 | 0.9968 | 0.326716  | 0.2936 | 0.549459  | 0.0122 | 0.456543  | 0.0416 |
| 10814913 | LOC686124  | 0.193358  | 0.8614 | 0.341368  | 0.0368 | 0.253792  | 0.0891 | 0.188240  | 0.2573 |
| 10814961 | ---        | 0.222587  | 0.9038 | 0.360335  | 0.1266 | 0.403099  | 0.0351 | 0.433754  | 0.0215 |
| 10814981 | RGD1307100 | 0.275544  | 0.8045 | 0.363915  | 0.0793 | 0.531930  | 0.0020 | 0.443935  | 0.0091 |
| 10815009 | Adad1      | -0.091616 | 0.9620 | -0.106207 | 0.5354 | -0.122924 | 0.2883 | -0.211025 | 0.0361 |
| 10815026 | Fgf2       | -0.370734 | 0.9010 | 0.325274  | 0.5535 | 0.676004  | 0.0327 | 0.585341  | 0.0731 |
| 10815049 | Spry1      | 0.162811  | 0.9934 | -0.694380 | 0.0244 | -0.618640 | 0.0256 | -0.784154 | 0.0033 |
| 10815120 | Plk4       | 0.068247  | 0.9999 | -0.448775 | 0.5160 | -0.651886 | 0.1371 | -0.945324 | 0.0205 |
| 10815176 | Phf17      | 0.011651  | 0.9999 | 0.245195  | 0.4187 | 0.603098  | 0.0019 | 0.326271  | 0.1198 |
| 10815308 | Mgst2      | -0.322783 | 0.9719 | -0.820385 | 0.1013 | -0.994200 | 0.0151 | -0.539703 | 0.2584 |
| 10815326 | RGD1309403 | 0.113725  | 0.9968 | 0.291026  | 0.3298 | 0.252865  | 0.2911 | 0.424512  | 0.0429 |
| 10815474 | Delk1      | 0.188224  | 0.9653 | -0.569141 | 0.0270 | -0.518828 | 0.0237 | -0.609246 | 0.0062 |
| 10815562 | LOC690752  | 0.103825  | 0.9819 | 0.340850  | 0.0292 | 0.182344  | 0.2437 | 0.302187  | 0.0295 |
| 10815661 | ---        | -0.018451 | 0.9999 | -0.280469 | 0.1057 | -0.286359 | 0.0471 | -0.259813 | 0.0795 |
| 10815679 | Mme        | 0.068674  | 0.9999 | -0.538641 | 0.1903 | -0.598596 | 0.0632 | -0.739375 | 0.0176 |
| 10815785 | Ptx3       | 0.400089  | 0.9889 | -0.937032 | 0.2309 | -1.260850 | 0.0309 | -1.065588 | 0.0784 |
| 10815806 | Mif1       | 0.609113  | 0.9544 | -0.704446 | 0.4901 | -1.095921 | 0.0899 | -1.283691 | 0.0408 |
| 10815882 | ---        | -0.136009 | 0.9395 | -0.138656 | 0.5373 | -0.286855 | 0.0292 | -0.185604 | 0.2097 |
| 10815888 | Smc4       | 0.099762  | 0.9999 | -0.390069 | 0.3186 | -0.333558 | 0.2913 | -0.635237 | 0.0186 |
| 10816000 | ---        | -0.013129 | 0.9999 | 0.235054  | 0.1494 | 0.436035  | 0.0006 | 0.236485  | 0.0776 |
| 10816204 | Lrba       | 0.206579  | 0.9757 | 0.415372  | 0.2600 | 0.421274  | 0.1402 | 0.539412  | 0.0474 |
| 10816409 | Nes        | -0.352153 | 0.9624 | 0.802793  | 0.0976 | 0.821857  | 0.0422 | 0.038611  | 0.9654 |
| 10816433 | Iqgap3     | -0.077799 | 0.9999 | -0.637847 | 0.0958 | -0.675537 | 0.0341 | -0.894144 | 0.0034 |
| 10816507 | Smg5       | -0.051825 | 0.9999 | 0.178328  | 0.5749 | 0.441237  | 0.0126 | 0.323767  | 0.0831 |
| 10816590 | RGD1565775 | 0.054172  | 0.9999 | 0.208675  | 0.6635 | 0.522681  | 0.0352 | 0.326923  | 0.2510 |
| 10816649 | Ash1l      | 0.188214  | 0.9475 | 0.282928  | 0.2721 | 0.519670  | 0.0045 | 0.413232  | 0.0254 |
| 10816791 | Shc1       | -0.058482 | 0.9999 | -0.249615 | 0.4591 | -0.406139 | 0.0594 | -0.474129 | 0.0239 |
| 10816807 | Pbxip1     | 0.058577  | 0.9999 | 0.371074  | 0.2166 | 0.497685  | 0.0281 | 0.553528  | 0.0124 |
| 10816875 | LOC361985  | -0.087627 | 0.9999 | 0.237809  | 0.4403 | 0.436207  | 0.0267 | 0.402741  | 0.0428 |
| 10817100 | ---        | 0.079221  | 0.9999 | 0.156129  | 0.6782 | 0.048289  | 0.8886 | 0.430680  | 0.0223 |
| 10817252 | mrpl9      | 0.044229  | 0.9999 | -0.110527 | 0.7833 | -0.456511 | 0.0086 | -0.373732 | 0.0339 |
| 10817276 | Pogz       | 0.270852  | 0.8275 | 0.288076  | 0.2166 | 0.365029  | 0.0390 | 0.372847  | 0.0340 |
| 10817340 | Lysmd1     | 0.243983  | 0.8614 | 0.598763  | 0.0012 | 0.665659  | 0.0002 | 0.656248  | 0.0002 |
| 10817419 | Ctsk       | -0.084398 | 0.9999 | -0.546481 | 0.1481 | -0.924624 | 0.0018 | -0.991594 | 0.0006 |
| 10817429 | Ctss       | 0.565836  | 0.8169 | -1.155011 | 0.0028 | -1.239065 | 0.0006 | -1.633676 | 0.0000 |
| 10817512 | Sv2a       | -0.085091 | 0.9999 | 0.536087  | 0.0140 | 0.779615  | 0.0001 | 0.568456  | 0.0030 |
| 10817527 | Hist2h2ab  | -0.093536 | 0.9999 | -0.912065 | 0.1449 | -0.782785 | 0.1393 | -1.293738 | 0.0075 |
| 10817531 | Hist2h2ab  | -0.003443 | 0.9999 | -0.483880 | 0.1351 | -0.640702 | 0.0125 | -0.732519 | 0.0034 |

|          |           |           |        |           |        |           |        |           |        |
|----------|-----------|-----------|--------|-----------|--------|-----------|--------|-----------|--------|
| 10817535 | Hist2h3c2 | -0.031669 | 0.9999 | -0.788122 | 0.0316 | -0.971817 | 0.0024 | -1.136556 | 0.0003 |
| 10817537 | Hist2h3c2 | -0.013230 | 0.9999 | -0.591363 | 0.0817 | -0.607497 | 0.0341 | -1.036004 | 0.0002 |
| 10817539 | Hist2h2bb | 0.146461  | 0.9998 | -0.727131 | 0.0412 | -0.825195 | 0.0072 | -0.905278 | 0.0025 |
| 10817547 | Hfe2      | 0.336902  | 0.9867 | -0.955917 | 0.0976 | -1.234830 | 0.0088 | -0.940517 | 0.0537 |
| 10817671 | ---       | 0.121700  | 0.9619 | 0.198897  | 0.2667 | 0.113028  | 0.5000 | 0.265585  | 0.0430 |
| 10817675 | Acp6      | 0.058328  | 0.9999 | 0.351901  | 0.0856 | 0.465204  | 0.0059 | 0.450543  | 0.0068 |
| 10818097 | Ppm1j     | 0.058028  | 0.9999 | 0.649309  | 0.0102 | 0.836184  | 0.0003 | 0.844640  | 0.0002 |
| 10818241 | ---       | 0.052468  | 0.9977 | -0.042820 | 0.8690 | -0.201022 | 0.0479 | -0.072776 | 0.6085 |
| 10818314 | Amigo1    | 0.060773  | 0.9999 | 0.118111  | 0.7983 | 0.397622  | 0.0469 | 0.193080  | 0.4430 |
| 10818358 | Psrc1     | -0.091900 | 0.9999 | -0.544896 | 0.0131 | -0.422604 | 0.0362 | -0.263474 | 0.2556 |
| 10818440 | Slc25a24  | -0.017113 | 0.9999 | -0.358559 | 0.3102 | -0.351515 | 0.1990 | -0.753472 | 0.0016 |
| 10818452 | Slc25a24  | 0.001734  | 0.9999 | -0.401576 | 0.4506 | -0.311966 | 0.4640 | -0.799074 | 0.0160 |
| 10818454 | Vav3      | -0.029795 | 0.9999 | -0.717011 | 0.0012 | -0.724292 | 0.0005 | -0.798873 | 0.0001 |
| 10818502 | Col11a1   | 0.058132  | 0.9999 | -0.164173 | 0.7172 | -0.372981 | 0.1015 | -0.448596 | 0.0425 |
| 10818649 | Lppr5     | 0.760587  | 0.8669 | -1.165445 | 0.1005 | -1.406710 | 0.0154 | -1.136850 | 0.0580 |
| 10818708 | F3        | 0.188672  | 0.9624 | -0.762569 | 0.0009 | -0.862976 | 0.0001 | -1.070773 | 0.0000 |
| 10819130 | Gbp11     | 0.106025  | 0.9977 | 0.303652  | 0.2821 | 0.475519  | 0.0183 | 0.362605  | 0.0873 |
| 10819145 | Cenpe     | 0.134207  | 0.9999 | -0.752967 | 0.1347 | -0.735528 | 0.0767 | -0.920992 | 0.0210 |
| 10819350 | LOC499718 | 0.197031  | 0.9867 | 0.503199  | 0.1538 | 0.608591  | 0.0288 | 0.738181  | 0.0061 |
| 10819562 | Lmo4      | 0.137755  | 0.9620 | -0.236828 | 0.2394 | -0.370794 | 0.0119 | -0.352605 | 0.0164 |
| 10819672 | Mcoln3    | -0.093639 | 0.9619 | -0.218500 | 0.0600 | -0.195794 | 0.0533 | -0.249703 | 0.0103 |
| 10819690 | Mcoln2    | 0.002115  | 0.9999 | -0.290467 | 0.1271 | -0.336166 | 0.0290 | -0.276158 | 0.0857 |
| 10819705 | Lpar3     | -0.430290 | 0.8562 | 0.368280  | 0.4284 | 0.633474  | 0.0351 | 0.723349  | 0.0137 |
| 10819737 | Gng5      | 0.319809  | 0.7375 | 0.456000  | 0.0209 | 0.638192  | 0.0003 | 0.616474  | 0.0004 |
| 10819787 | Dnajb4    | -0.210996 | 0.9247 | 0.451254  | 0.0403 | 0.539871  | 0.0044 | 0.619204  | 0.0009 |
| 10819816 | Pigk      | 0.018845  | 0.9999 | 0.430774  | 0.0271 | 0.562433  | 0.0010 | 0.507082  | 0.0024 |
| 10819880 | Negr1     | -0.201497 | 0.7200 | -0.112169 | 0.4941 | -0.162268 | 0.1219 | -0.310383 | 0.0012 |
| 10819905 | Ptger3    | -0.060567 | 0.9999 | 0.710930  | 0.0002 | 0.338390  | 0.0687 | 0.737118  | 0.0000 |
| 10819914 | Ankrd13c  | -0.157910 | 0.9926 | 0.548018  | 0.0872 | 0.636778  | 0.0166 | 0.763779  | 0.0030 |
| 10819946 | Depdc1    | -0.127061 | 0.9999 | -0.949366 | 0.2077 | -1.182463 | 0.0404 | -1.798323 | 0.0011 |
| 10819975 | Gpr177    | -0.006887 | 0.9999 | 0.223013  | 0.2910 | 0.286303  | 0.0633 | 0.335523  | 0.0255 |
| 10820084 | Fam81b    | -0.212904 | 0.4009 | -0.162545 | 0.1273 | -0.181473 | 0.0360 | -0.072345 | 0.5297 |
| 10820163 | Pik3cb    | -0.092675 | 0.9999 | 0.452359  | 0.1069 | 0.641356  | 0.0047 | 0.659699  | 0.0029 |
| 10820362 | Msh3      | 0.017171  | 0.9999 | -0.092845 | 0.7784 | -0.147429 | 0.4083 | -0.327502 | 0.0228 |
| 10820393 | Fam151b   | 0.061896  | 0.9999 | -0.077344 | 0.8615 | -0.021635 | 0.9484 | -0.372438 | 0.0306 |
| 10820434 | Thbs4     | 0.018628  | 0.9999 | 0.356551  | 0.0097 | 0.213311  | 0.1084 | 0.079150  | 0.6772 |
| 10820548 | Aggf1     | 0.166622  | 0.9475 | 0.198002  | 0.4444 | 0.355139  | 0.0315 | 0.233895  | 0.2062 |
| 10820567 | ---       | -0.091751 | 0.9626 | -0.091872 | 0.6598 | -0.234058 | 0.0305 | -0.014162 | 0.9494 |
| 10820713 | Rgnef     | 0.058777  | 0.9999 | -0.039102 | 0.9376 | -0.195519 | 0.2917 | -0.374598 | 0.0180 |
| 10820770 | Fcho2     | 0.156529  | 0.9921 | 0.499401  | 0.1219 | 0.740681  | 0.0040 | 0.647010  | 0.0114 |
| 10820835 | Map1b     | 0.043988  | 0.9999 | 1.070458  | 0.0008 | 1.071169  | 0.0004 | 1.009434  | 0.0006 |
| 10820865 | Bdp1      | -0.020839 | 0.9999 | 0.275570  | 0.3697 | 0.479878  | 0.0200 | 0.397007  | 0.0617 |
| 10821008 | LOC684611 | 0.093119  | 0.9999 | -0.903179 | 0.1086 | -0.952791 | 0.0404 | -1.298805 | 0.0035 |
| 10821016 | Ccnb1     | 0.151874  | 0.9999 | -1.355384 | 0.0738 | -1.536632 | 0.0157 | -2.238640 | 0.0003 |
| 10821587 | Zfp131    | -0.108357 | 0.9990 | 0.308934  | 0.3244 | 0.554454  | 0.0103 | 0.286995  | 0.2555 |
| 10821666 | C7        | 0.670232  | 0.9209 | -3.567266 | 0.0000 | -4.174101 | 0.0000 | -4.236844 | 0.0000 |
| 10821689 | Ptger4    | 0.093760  | 0.9999 | -0.631707 | 0.0044 | -0.711673 | 0.0005 | -0.699473 | 0.0005 |

|          |              |           |        |           |        |           |        |           |        |
|----------|--------------|-----------|--------|-----------|--------|-----------|--------|-----------|--------|
| 10821698 | Osmr         | 0.117458  | 0.9999 | -1.175047 | 0.0020 | -0.889639 | 0.0125 | -1.087583 | 0.0017 |
| 10821771 | Nipbl        | 0.298150  | 0.8614 | 0.247700  | 0.4889 | 0.505720  | 0.0200 | 0.341715  | 0.1501 |
| 10821822 | LOC100362827 | -0.045757 | 0.9999 | -0.544108 | 0.0271 | -0.481228 | 0.0288 | -0.560299 | 0.0088 |
| 10821824 | Slc1a3       | -0.341455 | 0.9619 | 0.960555  | 0.0160 | 1.337806  | 0.0002 | 1.341441  | 0.0002 |
| 10821991 | Npr3         | 0.635725  | 0.7312 | -0.803961 | 0.0393 | -0.974164 | 0.0038 | -0.920223 | 0.0054 |
| 10822064 | ---          | 0.035323  | 0.9999 | 0.011584  | 0.9841 | 0.152613  | 0.3908 | 0.305317  | 0.0381 |
| 10822107 | Fam105a      | 0.052054  | 0.9999 | -0.331630 | 0.4379 | -0.363750 | 0.2355 | -0.629704 | 0.0198 |
| 10822184 | 6-Mar        | 0.101581  | 0.9921 | 0.192542  | 0.4599 | 0.329553  | 0.0463 | 0.283778  | 0.0998 |
| 10822330 | Zbtb10       | 0.357394  | 0.7312 | 0.188203  | 0.5792 | 0.389037  | 0.0433 | 0.269716  | 0.2095 |
| 10822444 | Pde7a        | -0.020985 | 0.9999 | 0.551607  | 0.0298 | 0.367073  | 0.1222 | 0.175392  | 0.5714 |
| 10822558 | Ect2         | 0.065493  | 0.9999 | -0.848856 | 0.2840 | -0.674324 | 0.3088 | -1.440211 | 0.0095 |
| 10822637 | Skil         | -0.135557 | 0.9990 | 0.627265  | 0.0520 | 0.996203  | 0.0003 | 0.826695  | 0.0021 |
| 10822644 | Prkci        | 0.032483  | 0.9999 | 0.305390  | 0.4484 | 0.674341  | 0.0075 | 0.335381  | 0.2559 |
| 10822837 | Anxa5        | -0.185960 | 0.8614 | -0.126653 | 0.6221 | -0.200020 | 0.1838 | -0.294467 | 0.0332 |
| 10822852 | Ccna2        | 0.180486  | 0.9999 | -0.950009 | 0.0489 | -1.021938 | 0.0133 | -1.595236 | 0.0001 |
| 10822864 | Bbs7         | 0.085308  | 0.9999 | 0.213469  | 0.5711 | 0.423982  | 0.0498 | 0.267671  | 0.2837 |
| 10822983 | Pgrmc2       | 0.114384  | 0.9867 | 0.207666  | 0.3932 | 0.327341  | 0.0435 | 0.510372  | 0.0010 |
| 10823216 | RGD1562629   | 0.148614  | 0.9963 | 0.539351  | 0.0958 | 0.558535  | 0.0388 | 0.472653  | 0.0940 |
| 10823252 | RGD1562629   | 0.415250  | 0.8614 | 0.555608  | 0.1382 | 0.876019  | 0.0030 | 0.773085  | 0.0080 |
| 10823254 | RGD1562629   | 0.167101  | 0.9921 | 0.490452  | 0.1756 | 0.862210  | 0.0019 | 0.522335  | 0.0728 |
| 10823276 | RGD1562629   | 0.022547  | 0.9999 | 0.183096  | 0.5174 | 0.367445  | 0.0296 | 0.393458  | 0.0181 |
| 10823278 | Tm4sf1       | -0.045847 | 0.9999 | -1.336727 | 0.0024 | -1.212930 | 0.0032 | -1.271132 | 0.0015 |
| 10823303 | Pfn2         | 0.060389  | 0.9999 | 0.209830  | 0.4419 | 0.438705  | 0.0108 | 0.468331  | 0.0054 |
| 10823338 | Siah2        | -0.322955 | 0.7200 | 0.358058  | 0.0482 | 0.245805  | 0.1422 | 0.284260  | 0.0828 |
| 10823368 | Igsf10       | 0.643410  | 0.7200 | -0.645947 | 0.1137 | -0.830818 | 0.0117 | -1.010443 | 0.0016 |
| 10823456 | RGD1565059   | -0.139934 | 0.9525 | -0.298520 | 0.0731 | -0.490137 | 0.0005 | -0.295363 | 0.0371 |
| 10823555 | Rarres1      | 0.244194  | 0.8669 | -0.276377 | 0.2894 | -0.451772 | 0.0144 | -0.490252 | 0.0068 |
| 10823591 | Trim59       | -0.018424 | 0.9999 | -0.723720 | 0.0730 | -0.776721 | 0.0229 | -0.990231 | 0.0026 |
| 10823742 | Golim4       | 0.136213  | 0.9921 | -0.303709 | 0.3687 | -0.338182 | 0.1696 | -0.542506 | 0.0155 |
| 10823935 | ---          | 0.088991  | 0.9963 | 0.113856  | 0.7408 | 0.245555  | 0.1545 | 0.323644  | 0.0471 |
| 10823974 | LOC679811    | 0.226555  | 0.9310 | -0.296982 | 0.3415 | -0.449631 | 0.0372 | -0.388117 | 0.0830 |
| 10824010 | Mnd1         | 0.009942  | 0.9999 | -0.425783 | 0.0710 | -0.478475 | 0.0158 | -0.465636 | 0.0182 |
| 10824140 | Fcrls        | 0.121997  | 0.9999 | -0.626905 | 0.1153 | -0.751455 | 0.0200 | -0.605743 | 0.0709 |
| 10824165 | Pear1        | -0.019742 | 0.9999 | -0.627861 | 0.0243 | -0.585857 | 0.0187 | -0.795475 | 0.0010 |
| 10824284 | Tmem79       | 0.153970  | 0.9553 | 0.193905  | 0.4370 | 0.161279  | 0.4119 | 0.403560  | 0.0097 |
| 10824294 | Pmf1         | -0.040070 | 0.9999 | -0.639004 | 0.0147 | -0.988707 | 0.0000 | -1.137739 | 0.0000 |
| 10824349 | Syt11        | -0.020055 | 0.9999 | 1.358687  | 0.0005 | 1.546734  | 0.0000 | 1.758877  | 0.0000 |
| 10824357 | Msto1        | 0.088593  | 0.9985 | -0.262043 | 0.2698 | -0.265189 | 0.1488 | -0.343016 | 0.0492 |
| 10824434 | Rag1ap1      | 0.034978  | 0.9999 | -0.383391 | 0.1773 | -0.405989 | 0.0728 | -0.443861 | 0.0470 |
| 10824499 | Zbtb7b       | 0.077481  | 0.9998 | 0.334233  | 0.0806 | 0.415688  | 0.0089 | 0.468099  | 0.0025 |
| 10824513 | Cks1b        | -0.078220 | 0.9999 | -0.311021 | 0.2051 | -0.334007 | 0.0836 | -0.555125 | 0.0020 |
| 10824541 | ---          | -0.044139 | 0.9999 | -0.188360 | 0.6738 | -0.174449 | 0.5681 | -0.471783 | 0.0399 |
| 10824548 | ---          | -0.113503 | 0.9999 | -0.284176 | 0.5354 | -0.372915 | 0.2093 | -0.540113 | 0.0473 |
| 10824550 | ---          | 0.054022  | 0.9999 | -0.208126 | 0.6632 | -0.217405 | 0.4918 | -0.543813 | 0.0265 |
| 10824552 | ---          | 0.017963  | 0.9999 | -0.196972 | 0.6414 | -0.135447 | 0.6708 | -0.470487 | 0.0341 |
| 10824596 | Rps27        | -0.021961 | 0.9999 | 0.010258  | 0.9915 | -0.503697 | 0.0302 | -0.028538 | 0.9530 |
| 10824611 | Slc27a3      | 0.191660  | 0.9921 | -0.827477 | 0.0168 | -0.246988 | 0.5568 | -0.821966 | 0.0073 |

|          |                |           |        |           |        |           |        |           |        |
|----------|----------------|-----------|--------|-----------|--------|-----------|--------|-----------|--------|
| 10824680 | Snapap         | -0.021951 | 0.9999 | -0.141042 | 0.6224 | -0.191389 | 0.2782 | -0.310184 | 0.0468 |
| 10824728 | Spr3           | 0.284063  | 0.4507 | 0.147830  | 0.4197 | 0.224028  | 0.0640 | 0.275112  | 0.0186 |
| 10824758 | Lce1l // Lce1l | 0.158351  | 0.9525 | -0.130063 | 0.6808 | -0.341136 | 0.0332 | -0.345148 | 0.0304 |
| 10824814 | Oaz3           | -0.031933 | 0.9999 | 0.026576  | 0.9318 | 0.000482  | 0.9980 | 0.234971  | 0.0213 |
| 10824860 | Cgn            | -0.021210 | 0.9999 | 0.171297  | 0.4949 | 0.116514  | 0.5685 | 0.303886  | 0.0497 |
| 10824892 | Selenbp1       | 0.449299  | 0.8614 | -1.271761 | 0.0002 | -1.346545 | 0.0000 | -1.128701 | 0.0004 |
| 10824904 | ---            | 0.189386  | 0.9620 | 0.380263  | 0.1516 | 0.355351  | 0.1034 | 0.462178  | 0.0266 |
| 10824926 | Pip5k1a        | 0.052203  | 0.9999 | 0.247494  | 0.3150 | 0.448374  | 0.0086 | 0.333576  | 0.0595 |
| 10825003 | LOC689873      | 0.158512  | 0.9058 | 0.197098  | 0.3105 | 0.358643  | 0.0079 | 0.350500  | 0.0084 |
| 10825022 | Ecm1           | -0.053973 | 0.9999 | -0.256481 | 0.2701 | -0.352748 | 0.0369 | -0.273972 | 0.1295 |
| 10825144 | Hist2h3c2      | -0.031669 | 0.9999 | -0.788122 | 0.0316 | -0.971817 | 0.0024 | -1.136556 | 0.0003 |
| 10825146 | Hist2h2ab      | 0.000197  | 0.9999 | -0.477187 | 0.1418 | -0.647627 | 0.0114 | -0.729670 | 0.0034 |
| 10825151 | Hist2h4        | 0.006396  | 0.9999 | -0.758237 | 0.1273 | -1.152167 | 0.0036 | -1.397165 | 0.0004 |
| 10825153 | Fcgr1a         | 0.394627  | 0.8570 | -0.855418 | 0.0038 | -0.937806 | 0.0006 | -0.576946 | 0.0388 |
| 10825236 | Rpl38          | -0.128427 | 0.9451 | -0.155737 | 0.4275 | -0.309230 | 0.0131 | -0.161893 | 0.2702 |
| 10825349 | Hsd3b6         | 0.136014  | 0.9582 | 0.145043  | 0.5609 | 0.291892  | 0.0419 | 0.035284  | 0.8945 |
| 10825375 | Wdr3           | -0.126172 | 0.9942 | 0.243912  | 0.5062 | 0.484473  | 0.0282 | 0.132477  | 0.6903 |
| 10825575 | Olfml3         | -0.006653 | 0.9999 | -0.986230 | 0.0118 | -1.334803 | 0.0002 | -1.260214 | 0.0003 |
| 10825580 | Hipk1          | 0.169304  | 0.9624 | 0.383836  | 0.0992 | 0.562881  | 0.0030 | 0.588835  | 0.0015 |
| 10825582 | Hipk1          | -0.010596 | 0.9999 | 0.374982  | 0.1781 | 0.450357  | 0.0380 | 0.340101  | 0.1469 |
| 10825636 | Lrig2          | 0.136698  | 0.9795 | 0.222575  | 0.4241 | 0.369812  | 0.0410 | 0.278057  | 0.1557 |
| 10825702 | Cttnbp2nl      | -0.006935 | 0.9999 | 0.327326  | 0.3486 | 0.612482  | 0.0095 | 0.460797  | 0.0600 |
| 10825736 | Adora3         | -0.020246 | 0.9999 | -0.118196 | 0.6544 | -0.299665 | 0.0292 | -0.242381 | 0.0922 |
| 10825809 | Cd53           | 0.675558  | 0.7200 | -0.905031 | 0.0136 | -1.375279 | 0.0000 | -1.238152 | 0.0002 |
| 10826082 | Gpsm2          | 0.079835  | 0.9999 | -0.608861 | 0.1231 | -0.715174 | 0.0252 | -0.696284 | 0.0291 |
| 10826249 | Vcam1          | 0.163406  | 0.9999 | -0.763069 | 0.1473 | -0.797513 | 0.0613 | -0.857231 | 0.0424 |
| 10826392 | Lppr4          | 0.138140  | 0.9921 | 0.424479  | 0.0849 | 0.311898  | 0.1606 | 0.542772  | 0.0067 |
| 10826517 | Usp53          | 0.165173  | 0.9968 | 0.319495  | 0.5322 | 0.734938  | 0.0133 | 0.623580  | 0.0395 |
| 10826561 | Ndst3          | 0.112140  | 0.9999 | -0.755011 | 0.0055 | -0.973461 | 0.0001 | -1.017204 | 0.0001 |
| 10826602 | ---            | -0.131699 | 0.9867 | -0.359336 | 0.1205 | -0.428200 | 0.0224 | -0.371882 | 0.0522 |
| 10826723 | Enpep          | -0.133965 | 0.9998 | -0.613439 | 0.0577 | -0.600182 | 0.0314 | -0.636147 | 0.0207 |
| 10826897 | RGD1311728     | 0.072743  | 0.9843 | 0.079968  | 0.6904 | 0.060306  | 0.6774 | 0.202013  | 0.0470 |
| 10826969 | Bank1          | 0.132610  | 0.8541 | 0.072856  | 0.6891 | 0.020358  | 0.9034 | 0.211966  | 0.0182 |
| 10827105 | Pkn2           | 0.095924  | 0.9942 | 0.187448  | 0.4936 | 0.412691  | 0.0120 | 0.204047  | 0.2973 |
| 10827129 | Hs2st1         | 0.089069  | 0.9990 | 0.268467  | 0.2835 | 0.368845  | 0.0418 | 0.150159  | 0.5333 |
| 10827382 | ---            | 0.038426  | 0.9999 | 0.270291  | 0.5239 | 0.567569  | 0.0240 | 0.413836  | 0.1252 |
| 10827413 | Msh4           | -0.099328 | 0.8541 | -0.110751 | 0.2187 | -0.134639 | 0.0499 | -0.045121 | 0.6474 |
| 10827505 | Fpgt           | -0.055737 | 0.9999 | 0.454821  | 0.0547 | 0.539677  | 0.0073 | 0.663748  | 0.0007 |
| 10827517 | Cth            | 0.076812  | 0.9999 | 0.597008  | 0.1253 | 0.418866  | 0.2353 | 0.721973  | 0.0203 |
| 10827592 | Clic2          | 0.292039  | 0.9624 | -0.925968 | 0.0123 | -0.997962 | 0.0028 | -1.029162 | 0.0016 |
| 10827686 | RT1-M6-1       | -0.254844 | 0.8997 | -0.363776 | 0.1901 | -0.506448 | 0.0166 | -0.425404 | 0.0495 |
| 10827701 | Ppp1r1l        | 0.058117  | 0.9990 | 0.243749  | 0.0741 | 0.127229  | 0.3548 | 0.237101  | 0.0421 |
| 10827708 | Trim40         | -0.285229 | 0.7312 | -0.250127 | 0.2293 | -0.322431 | 0.0388 | -0.235848 | 0.1662 |
| 10827796 | RT1-N3         | 0.070724  | 0.9999 | -0.438397 | 0.0388 | -0.556680 | 0.0024 | -0.504883 | 0.0050 |
| 10827835 | RT1-T24-1      | 0.070476  | 0.9999 | -0.477309 | 0.0532 | -0.403741 | 0.0640 | -0.508963 | 0.0154 |
| 10827846 | Abcf1          | -0.045132 | 0.9999 | 0.226627  | 0.3038 | 0.322529  | 0.0404 | 0.225976  | 0.1946 |
| 10828032 | Aif1           | 0.238676  | 0.9287 | -0.592603 | 0.0148 | -0.754828 | 0.0006 | -0.554145 | 0.0107 |

|          |           |           |        |           |        |           |        |           |        |
|----------|-----------|-----------|--------|-----------|--------|-----------|--------|-----------|--------|
| 10828111 | G6b       | -0.299579 | 0.7016 | -0.203523 | 0.3014 | -0.294649 | 0.0357 | -0.069443 | 0.7558 |
| 10828229 | C4-2      | -0.044314 | 0.9999 | -0.117013 | 0.4613 | -0.187368 | 0.0654 | -0.223808 | 0.0234 |
| 10828316 | Rnf5      | 0.038535  | 0.9999 | 0.138831  | 0.5909 | 0.276631  | 0.0593 | 0.326928  | 0.0219 |
| 10828357 | Psmb9     | 0.119765  | 0.9990 | -0.539782 | 0.0578 | -0.471303 | 0.0585 | -0.630748 | 0.0081 |
| 10828433 | Rps18     | -0.096237 | 0.9999 | -0.255967 | 0.4996 | -0.589693 | 0.0091 | -0.524654 | 0.0205 |
| 10828440 | B3gal14   | 0.101954  | 0.9921 | -0.177792 | 0.4635 | -0.229642 | 0.1592 | -0.333556 | 0.0272 |
| 10828447 | Kifc1     | -0.036578 | 0.9999 | -0.412860 | 0.0730 | -0.634266 | 0.0010 | -0.660056 | 0.0005 |
| 10828477 | Syngap1   | -0.003979 | 0.9999 | 0.262788  | 0.0796 | 0.363704  | 0.0035 | 0.407398  | 0.0008 |
| 10828614 | ---       | -0.032157 | 0.9999 | 0.399837  | 0.0531 | 0.531247  | 0.0026 | 0.374473  | 0.0369 |
| 10828737 | Rpl10a    | -0.014870 | 0.9999 | -0.216550 | 0.2052 | -0.464423 | 0.0003 | -0.518830 | 0.0001 |
| 10828827 | Cdkn1a    | -0.188977 | 0.9819 | 0.269524  | 0.5376 | 0.653397  | 0.0096 | 0.730230  | 0.0030 |
| 10828854 | Pi16      | 0.106636  | 0.9936 | -0.425223 | 0.0413 | -0.402113 | 0.0276 | -0.625359 | 0.0004 |
| 10828892 | Tbc1d22b  | -0.018635 | 0.9999 | 0.542186  | 0.0003 | 0.399164  | 0.0043 | 0.574301  | 0.0000 |
| 10829082 | Abcg1     | -0.099947 | 0.9999 | -0.275277 | 0.4403 | -0.780391 | 0.0005 | -0.875234 | 0.0001 |
| 10829367 | Adarb1    | -0.112587 | 0.9999 | 0.600802  | 0.0714 | 0.645664  | 0.0219 | 0.353127  | 0.2861 |
| 10829437 | Col6a1    | 0.180423  | 0.9990 | -1.544169 | 0.0000 | -1.640986 | 0.0000 | -2.208240 | 0.0000 |
| 10829470 | Col6a2    | 0.154171  | 0.9998 | -1.208783 | 0.0003 | -1.397776 | 0.0000 | -1.681855 | 0.0000 |
| 10829676 | ---       | -0.009977 | 0.9999 | -0.078950 | 0.9221 | -0.050858 | 0.9239 | 0.596046  | 0.0343 |
| 10829713 | Bicc1     | 0.188238  | 0.9867 | -0.976210 | 0.0005 | -1.228400 | 0.0000 | -1.541131 | 0.0000 |
| 10829761 | Cdc2      | 0.072074  | 0.9999 | -0.918044 | 0.1743 | -1.000185 | 0.0616 | -1.832541 | 0.0003 |
| 10829780 | Arid5b    | 0.034352  | 0.9999 | 0.427757  | 0.2144 | 0.656553  | 0.0107 | 0.593626  | 0.0210 |
| 10829791 | Zfp365    | -0.077581 | 0.9999 | 0.437736  | 0.0747 | 0.429128  | 0.0405 | 0.122783  | 0.6970 |
| 10829965 | Spock2    | -0.101315 | 0.9999 | 0.321993  | 0.3641 | 0.394944  | 0.1176 | 0.505351  | 0.0360 |
| 10829993 | MGC112715 | 0.126319  | 0.9525 | -0.440928 | 0.0010 | -0.462697 | 0.0003 | -0.532066 | 0.0000 |
| 10830174 | Pln       | 0.156617  | 0.9632 | 0.250177  | 0.3696 | 0.338117  | 0.0819 | 0.457417  | 0.0129 |
| 10830230 | Smpd13a   | 0.370339  | 0.8562 | -0.731898 | 0.0088 | -0.803047 | 0.0016 | -0.764447 | 0.0021 |
| 10830253 | Dse       | 0.028568  | 0.9999 | -0.428968 | 0.0613 | -0.344182 | 0.0920 | -0.652575 | 0.0006 |
| 10830303 | Hdac2     | 0.208425  | 0.8614 | 0.198980  | 0.3696 | 0.322575  | 0.0314 | 0.208954  | 0.2166 |
| 10830369 | Tube1     | -0.026072 | 0.9999 | -0.175977 | 0.5663 | -0.325187 | 0.0680 | -0.373350 | 0.0321 |
| 10830398 | Traf3ip2  | -0.010100 | 0.9999 | -0.354197 | 0.0155 | -0.488752 | 0.0003 | -0.464258 | 0.0004 |
| 10830699 | Ascc3     | 0.157208  | 0.9795 | 0.354072  | 0.1868 | 0.413237  | 0.0481 | 0.270576  | 0.2564 |
| 10830857 | Gabbr1    | 0.088504  | 0.9998 | 0.282256  | 0.2735 | 0.544347  | 0.0030 | 0.489695  | 0.0067 |
| 10830888 | Zfp57     | -0.147619 | 0.9977 | 0.457420  | 0.2240 | 0.488786  | 0.0953 | 0.563638  | 0.0490 |
| 10830989 | Ppp1r10   | 0.049575  | 0.9999 | 0.159672  | 0.6613 | 0.410854  | 0.0292 | 0.301498  | 0.1379 |
| 10831011 | Dhx16     | -0.052544 | 0.9999 | 0.165126  | 0.3137 | 0.237545  | 0.0406 | 0.130286  | 0.3507 |
| 10831041 | Mdc1      | -0.018144 | 0.9999 | -0.394795 | 0.0392 | -0.387639 | 0.0203 | -0.603954 | 0.0002 |
| 10831077 | Ier3      | -0.475070 | 0.7312 | 0.519009  | 0.0905 | 0.660957  | 0.0088 | 0.698629  | 0.0046 |
| 10831247 | G7c       | -0.115902 | 0.9965 | 0.637028  | 0.0044 | 0.519056  | 0.0122 | 0.672347  | 0.0009 |
| 10831300 | Neu1      | -0.090479 | 0.9921 | 1.052141  | 0.0000 | 0.908462  | 0.0000 | 1.047542  | 0.0000 |
| 10831332 | Ehmt2     | 0.190345  | 0.8176 | 0.235488  | 0.1185 | 0.286998  | 0.0186 | 0.228686  | 0.0713 |
| 10831595 | Psmb8     | 0.154315  | 0.9659 | -0.287109 | 0.2860 | -0.414071 | 0.0326 | -0.355214 | 0.0762 |
| 10831620 | RT1-DMb   | 0.257568  | 0.9620 | -0.732614 | 0.0176 | -0.486839 | 0.0958 | -0.664018 | 0.0166 |
| 10831628 | RT1-DMa   | 0.144235  | 0.9921 | -0.318605 | 0.2880 | -0.522037 | 0.0139 | -0.359587 | 0.1166 |
| 10831909 | Tead3     | -0.125130 | 0.9942 | 0.516616  | 0.0332 | 0.480165  | 0.0251 | 0.660644  | 0.0014 |
| 10832163 | Wdr4      | -0.152390 | 0.9620 | 0.182432  | 0.5171 | 0.337594  | 0.0471 | 0.143564  | 0.5190 |
| 10832306 | Itgb2     | 0.487546  | 0.8541 | -1.148994 | 0.0011 | -1.352509 | 0.0001 | -1.085778 | 0.0008 |
| 10832341 | Slc19a1   | -0.120216 | 0.9699 | 0.230601  | 0.2777 | 0.204172  | 0.2335 | 0.355117  | 0.0186 |

|          |            |           |        |           |        |           |        |           |        |
|----------|------------|-----------|--------|-----------|--------|-----------|--------|-----------|--------|
| 10832404 | Mcm3ap     | 0.043643  | 0.9999 | 0.190378  | 0.5842 | 0.444593  | 0.0220 | 0.185913  | 0.4563 |
| 10832693 | Fam13c1    | -0.146763 | 0.8973 | -0.231119 | 0.1230 | -0.288183 | 0.0166 | -0.168237 | 0.2214 |
| 10832790 | Rtkn2      | -0.133930 | 0.9955 | -0.276334 | 0.4763 | -0.429001 | 0.0829 | -0.499598 | 0.0375 |
| 10832802 | Egr2       | -0.367077 | 0.8541 | -0.467164 | 0.1365 | -0.684041 | 0.0057 | -0.758720 | 0.0017 |
| 10832808 | Jmjd1c     | 0.088130  | 0.9999 | 0.553405  | 0.0126 | 0.565848  | 0.0046 | 0.579875  | 0.0030 |
| 10832829 | Jmjd1c     | 0.207906  | 0.9852 | 0.495114  | 0.1874 | 0.580157  | 0.0474 | 0.537534  | 0.0722 |
| 10832831 | Jmjd1c     | 0.132375  | 0.9972 | 0.547121  | 0.0563 | 0.706744  | 0.0037 | 0.740927  | 0.0018 |
| 10832833 | Jmjd1c     | 0.138302  | 0.9999 | 0.582950  | 0.1389 | 0.719338  | 0.0219 | 0.446507  | 0.2067 |
| 10832934 | Chst3      | -0.184823 | 0.9819 | 0.012030  | 0.9903 | 0.693955  | 0.0044 | 0.371212  | 0.1733 |
| 10833005 | Slc29a3    | 0.136466  | 0.9784 | -0.526494 | 0.0059 | -0.756035 | 0.0000 | -0.557591 | 0.0012 |
| 10833047 | Adams14    | -0.081999 | 0.9998 | 0.371480  | 0.0731 | 0.175858  | 0.4163 | 0.403742  | 0.0199 |
| 10833093 | H2afy2     | 0.005719  | 0.9999 | -0.328969 | 0.2371 | -0.598700 | 0.0033 | -0.588418 | 0.0031 |
| 10833152 | Csrp2      | -0.071455 | 0.9999 | 0.995710  | 0.0110 | 0.671509  | 0.0680 | 0.708233  | 0.0537 |
| 10833451 | Serinc1    | -0.001240 | 0.9999 | 0.171067  | 0.5128 | 0.235990  | 0.1621 | 0.340440  | 0.0295 |
| 10833492 | Ranbp2     | 0.131589  | 0.9925 | 0.278932  | 0.4176 | 0.499018  | 0.0252 | 0.344451  | 0.1573 |
| 10833617 | RGD1561777 | 0.069020  | 0.9999 | -0.243701 | 0.2675 | -0.414240 | 0.0085 | -0.259363 | 0.1299 |
| 10833668 | Gpbp1l1    | 0.083700  | 0.9999 | 0.290207  | 0.2895 | 0.435145  | 0.0267 | 0.337489  | 0.1037 |
| 10833738 | Ccdc162    | -0.097179 | 0.9653 | -0.143542 | 0.4412 | -0.192408 | 0.1253 | -0.274727 | 0.0193 |
| 10834005 | Ptgrfr     | 0.156356  | 0.9999 | 0.594160  | 0.2555 | 0.847713  | 0.0263 | 0.563441  | 0.1824 |
| 10834109 | Il1rn      | 0.314577  | 0.9795 | -0.836777 | 0.0922 | -1.009152 | 0.0133 | -0.883843 | 0.0323 |
| 10834204 | LOC680531  | -0.200660 | 0.8945 | -0.437009 | 0.0139 | -0.677617 | 0.0000 | -0.586258 | 0.0002 |
| 10834225 | Npdc1      | 0.048076  | 0.9999 | -0.154453 | 0.6902 | -0.228494 | 0.3109 | -0.406995 | 0.0362 |
| 10834241 | Abca2      | 0.212444  | 0.9620 | 0.216077  | 0.6077 | 0.253702  | 0.3547 | 0.493605  | 0.0320 |
| 10834549 | Nelf       | 0.109233  | 0.9953 | -0.103164 | 0.8275 | -0.248582 | 0.2624 | -0.433238 | 0.0253 |
| 10834604 | ---        | -0.258110 | 0.9630 | -0.375559 | 0.4275 | -0.431274 | 0.1981 | -0.682801 | 0.0238 |
| 10834668 | ---        | -0.023713 | 0.9999 | 0.063548  | 0.9070 | 0.424692  | 0.0281 | 0.323923  | 0.1158 |
| 10834731 | Col5a1     | -0.006160 | 0.9999 | -0.330003 | 0.6340 | -0.831123 | 0.0233 | -0.914404 | 0.0107 |
| 10834817 | Ralgds     | 0.166666  | 0.9620 | -0.257635 | 0.3153 | -0.243392 | 0.2251 | -0.388115 | 0.0309 |
| 10834837 | Tsc1       | -0.020249 | 0.9999 | 0.060510  | 0.8994 | 0.363318  | 0.0354 | 0.195034  | 0.3492 |
| 10834908 | Setx       | 0.226231  | 0.9624 | 0.291427  | 0.5087 | 0.547058  | 0.0404 | 0.258841  | 0.4425 |
| 10835054 | Spna2      | 0.143961  | 0.9777 | 0.253768  | 0.3599 | 0.432114  | 0.0211 | 0.309587  | 0.1246 |
| 10835158 | Phyhd1     | -0.063171 | 0.9999 | -0.670784 | 0.0069 | -0.704736 | 0.0020 | -0.918420 | 0.0001 |
| 10835268 | Usp20      | -0.001411 | 0.9999 | 0.463389  | 0.0630 | 0.663537  | 0.0016 | 0.652272  | 0.0015 |
| 10835498 | Ppapdc3    | -0.050339 | 0.9999 | 0.255528  | 0.5384 | 0.420367  | 0.0955 | 0.562133  | 0.0189 |
| 10835645 | LOC499782  | -0.023213 | 0.9999 | -0.222627 | 0.2457 | -0.357483 | 0.0105 | -0.403853 | 0.0030 |
| 10835831 | ---        | 0.134633  | 0.9328 | 0.147886  | 0.4829 | 0.033079  | 0.8874 | 0.277861  | 0.0313 |
| 10835914 | Rabgap1    | 0.200294  | 0.9247 | 0.300007  | 0.2148 | 0.485206  | 0.0070 | 0.277345  | 0.1667 |
| 10835964 | Nek6       | 0.091474  | 0.9998 | -0.282298 | 0.3007 | -0.562390 | 0.0032 | -0.514178 | 0.0061 |
| 10835987 | ---        | 0.052618  | 0.9999 | 0.258760  | 0.5687 | 0.561584  | 0.0291 | 0.401644  | 0.1511 |
| 10836083 | LOC311026  | 0.053612  | 0.9999 | 0.261359  | 0.3889 | 0.403240  | 0.0475 | 0.299335  | 0.1788 |
| 10836249 | ---        | -0.253480 | 0.7989 | -0.202156 | 0.3965 | -0.369840 | 0.0179 | -0.168378 | 0.3838 |
| 10836321 | Pkp4       | -0.069110 | 0.9999 | 0.132483  | 0.7279 | 0.284619  | 0.1397 | 0.421749  | 0.0182 |
| 10836515 | B3galt1    | -0.120803 | 0.9999 | 0.621193  | 0.0362 | 0.306508  | 0.3139 | 0.358325  | 0.2273 |
| 10836650 | RGD1565257 | 0.051426  | 0.9999 | 0.149319  | 0.5268 | 0.353765  | 0.0103 | 0.190804  | 0.2299 |
| 10836661 | RGD1565257 | 0.107925  | 0.9921 | 0.234174  | 0.3431 | 0.367063  | 0.0308 | 0.255283  | 0.1719 |
| 10836719 | LOC499806  | -0.161554 | 0.7668 | -0.123272 | 0.3841 | -0.251726 | 0.0067 | -0.182119 | 0.0591 |
| 10836849 | Itga6      | -0.516586 | 0.8112 | 0.768152  | 0.0430 | 0.810058  | 0.0132 | 0.890877  | 0.0054 |

|          |            |           |        |           |        |           |        |           |        |
|----------|------------|-----------|--------|-----------|--------|-----------|--------|-----------|--------|
| 10836890 | Rapgef4    | -0.395018 | 0.8669 | 0.807601  | 0.0147 | 0.585420  | 0.0572 | 0.354989  | 0.3272 |
| 10836923 | RGD1561394 | -0.045989 | 0.9999 | 0.212639  | 0.2651 | 0.290719  | 0.0366 | 0.254296  | 0.0765 |
| 10837050 | Agps       | -0.051840 | 0.9999 | -0.211355 | 0.4042 | -0.127680 | 0.5655 | -0.355498 | 0.0321 |
| 10837439 | Olr453     | -0.286855 | 0.3730 | -0.249599 | 0.0549 | -0.278420 | 0.0120 | -0.245119 | 0.0284 |
| 10837794 | Sfpi1      | 0.066599  | 0.9999 | -0.490842 | 0.0142 | -0.418785 | 0.0217 | -0.384839 | 0.0359 |
| 10837881 | Lrp4       | 0.110479  | 0.9968 | 0.402190  | 0.1005 | 0.603817  | 0.0025 | 0.330447  | 0.1284 |
| 10837921 | Ckap5      | 0.185851  | 0.9653 | -0.355857 | 0.2600 | -0.421664 | 0.0741 | -0.535866 | 0.0180 |
| 10837974 | Nyw1       | 0.100454  | 0.9731 | 0.186834  | 0.3066 | 0.270248  | 0.0372 | 0.221660  | 0.1042 |
| 10838022 | Pex16      | -0.059065 | 0.9999 | -0.116205 | 0.6782 | -0.287252 | 0.0447 | -0.096718 | 0.6358 |
| 10838100 | Traf6      | 0.026529  | 0.9999 | 0.169084  | 0.6881 | 0.424308  | 0.0469 | 0.233695  | 0.3630 |
| 10838155 | Cat        | 0.026114  | 0.9999 | 0.265761  | 0.5784 | 0.560484  | 0.0384 | 0.636811  | 0.0162 |
| 10838170 | Abtb2      | -0.128995 | 0.9942 | 0.235037  | 0.5322 | 0.494655  | 0.0252 | 0.261075  | 0.3233 |
| 10838242 | Wt1        | 0.002684  | 0.9999 | -0.275761 | 0.3869 | -0.364584 | 0.0976 | -0.477732 | 0.0227 |
| 10838282 | ---        | -0.293433 | 0.9201 | -0.485060 | 0.1422 | -0.591558 | 0.0246 | -0.551896 | 0.0367 |
| 10838354 | Lgr4       | 0.266948  | 0.9570 | 0.385405  | 0.3377 | 0.654291  | 0.0177 | 0.470317  | 0.1110 |
| 10838373 | Ccdc34     | 0.108079  | 0.9999 | -0.315635 | 0.4551 | -0.528494 | 0.0507 | -0.601467 | 0.0227 |
| 10838451 | Lpcat4     | -0.070249 | 0.9942 | 0.410443  | 0.0013 | 0.422256  | 0.0005 | 0.493614  | 0.0000 |
| 10838647 | Bub1b      | 0.176200  | 0.9998 | -0.860207 | 0.0413 | -0.935592 | 0.0102 | -1.217377 | 0.0006 |
| 10838694 | Traf4af1   | 0.073941  | 0.9999 | -0.835282 | 0.0954 | -0.862328 | 0.0389 | -1.160922 | 0.0037 |
| 10838733 | Casc5      | 0.253457  | 0.9999 | -0.872368 | 0.2440 | -0.883848 | 0.1307 | -1.553264 | 0.0035 |
| 10838741 | Casc5      | 0.114682  | 0.9999 | -0.645993 | 0.5365 | -1.124836 | 0.0729 | -1.557289 | 0.0089 |
| 10838745 | Casc5      | 0.200174  | 0.9999 | -0.717442 | 0.2221 | -0.911995 | 0.0402 | -1.229341 | 0.0038 |
| 10838762 | Rad51      | -0.028208 | 0.9999 | -0.508531 | 0.5719 | -0.808266 | 0.1335 | -1.433970 | 0.0034 |
| 10838772 | Gchfr      | -0.222330 | 0.8622 | -0.239676 | 0.3179 | -0.367698 | 0.0289 | -0.106886 | 0.6681 |
| 10838843 | Nusap1     | 0.034550  | 0.9999 | -1.246596 | 0.0480 | -1.356463 | 0.0120 | -1.919542 | 0.0003 |
| 10838902 | Mga        | 0.294534  | 0.8562 | 0.111223  | 0.8232 | 0.418500  | 0.0431 | 0.272661  | 0.2475 |
| 10839090 | Ccndbp1    | 0.053734  | 0.9999 | 0.436997  | 0.1901 | 0.529475  | 0.0401 | 0.388422  | 0.1673 |
| 10839135 | Map1a      | -0.106634 | 0.9977 | 0.317211  | 0.2538 | 0.361624  | 0.0854 | 0.504443  | 0.0110 |
| 10839238 | Trim69     | -0.080025 | 0.9620 | -0.098347 | 0.5081 | -0.073752 | 0.5281 | -0.215419 | 0.0138 |
| 10839400 | Rpl32      | -0.028700 | 0.9999 | -0.139050 | 0.6631 | -0.345307 | 0.0368 | -0.379553 | 0.0194 |
| 10839508 | Blvra      | -0.183832 | 0.9867 | -0.547728 | 0.0791 | -0.600785 | 0.0219 | -0.660957 | 0.0099 |
| 10839622 | Mrps5      | -0.039926 | 0.9999 | -0.109770 | 0.7235 | -0.187192 | 0.2694 | -0.307900 | 0.0394 |
| 10839655 | Bcl2l11    | 0.515712  | 0.7312 | -0.505349 | 0.1435 | -0.543841 | 0.0514 | -0.584379 | 0.0339 |
| 10839790 | Sirpa      | 0.209670  | 0.9310 | -0.643594 | 0.0020 | -0.792695 | 0.0001 | -0.655183 | 0.0006 |
| 10839947 | Mrps26     | 0.009491  | 0.9999 | -0.186496 | 0.4602 | -0.385871 | 0.0137 | -0.493488 | 0.0012 |
| 10840007 | Hspa12b    | -0.022462 | 0.9999 | -0.352343 | 0.0468 | -0.340587 | 0.0272 | -0.298162 | 0.0586 |
| 10840020 | Cdc25b     | 0.110124  | 0.9999 | -0.463396 | 0.2344 | -0.633385 | 0.0292 | -0.514519 | 0.0906 |
| 10840076 | Prnp       | -0.086716 | 0.9999 | 0.564344  | 0.1280 | 0.730763  | 0.0134 | 0.693901  | 0.0189 |
| 10840131 | Crls1      | 0.215874  | 0.9589 | 0.331685  | 0.3049 | 0.472167  | 0.0404 | 0.540250  | 0.0164 |
| 10840415 | RGD1566320 | 0.170843  | 0.9707 | 0.482234  | 0.0565 | 0.469581  | 0.0316 | 0.482814  | 0.0259 |
| 10840431 | Slc24a3    | -0.098562 | 0.9968 | -0.254091 | 0.3194 | -0.465138 | 0.0083 | -0.144306 | 0.5516 |
| 10840475 | ---        | 0.030038  | 0.9999 | 0.153335  | 0.4064 | 0.108353  | 0.4835 | 0.282418  | 0.0178 |
| 10840595 | ---        | 0.056750  | 0.9999 | 0.259460  | 0.2723 | 0.243167  | 0.1943 | 0.373595  | 0.0282 |
| 10840721 | Gins1      | 0.032252  | 0.9999 | -0.517957 | 0.2457 | -0.624927 | 0.0625 | -0.859469 | 0.0071 |
| 10840791 | Srxn1      | 0.037745  | 0.9999 | 0.075186  | 0.8442 | 0.220524  | 0.1883 | 0.333850  | 0.0291 |
| 10840861 | Rem1       | 0.069792  | 0.9999 | -0.512594 | 0.0333 | -0.598498 | 0.0044 | -0.499377 | 0.0175 |
| 10840910 | Tpx2       | 0.222770  | 0.9990 | -0.785008 | 0.1775 | -0.970799 | 0.0320 | -1.254538 | 0.0039 |

|          |            |           |        |           |        |           |        |           |        |
|----------|------------|-----------|--------|-----------|--------|-----------|--------|-----------|--------|
| 10840975 | Hck        | 0.247989  | 0.8973 | -0.155774 | 0.7143 | -0.444084 | 0.0315 | -0.212765 | 0.4074 |
| 10841579 | MyI9       | -0.194004 | 0.9921 | -0.323215 | 0.5387 | -0.610832 | 0.0498 | -0.882587 | 0.0028 |
| 10841586 | RGD1564927 | 0.073595  | 0.9999 | 0.271043  | 0.3461 | 0.441070  | 0.0253 | 0.294245  | 0.1777 |
| 10841693 | Lbp        | 0.167015  | 0.9999 | -0.760859 | 0.1528 | -1.278259 | 0.0020 | -0.753706 | 0.0857 |
| 10841720 | ---        | 0.009876  | 0.9999 | 0.183875  | 0.4637 | 0.359576  | 0.0216 | 0.346665  | 0.0264 |
| 10841800 | Fam83d     | -0.055493 | 0.9999 | -1.108090 | 0.0119 | -1.357375 | 0.0007 | -1.743035 | 0.0000 |
| 10841974 | Mybl2      | 0.162807  | 0.9999 | -0.484191 | 0.3629 | -0.646367 | 0.0829 | -1.008636 | 0.0037 |
| 10842043 | Wisp2      | 0.282186  | 0.9867 | -1.296602 | 0.0020 | -1.451361 | 0.0003 | -1.329922 | 0.0005 |
| 10842187 | Ube2c      | -0.097986 | 0.9998 | -0.468219 | 0.0460 | -0.550506 | 0.0062 | -0.690686 | 0.0005 |
| 10842193 | ---        | -0.116508 | 0.9981 | 0.257146  | 0.4836 | 0.406236  | 0.0800 | 0.450804  | 0.0482 |
| 10842436 | Rpl38      | -0.120670 | 0.9620 | -0.143277 | 0.5070 | -0.284000 | 0.0289 | -0.166273 | 0.2705 |
| 10842500 | RGD1562846 | -0.574334 | 0.8541 | 1.007912  | 0.0202 | 1.072263  | 0.0056 | 1.005331  | 0.0086 |
| 10842682 | ---        | -0.193207 | 0.8437 | -0.207957 | 0.2218 | -0.289907 | 0.0230 | -0.270909 | 0.0341 |
| 10842776 | ---        | 0.252519  | 0.9544 | 0.400685  | 0.2627 | 0.564776  | 0.0300 | 0.236887  | 0.4848 |
| 10842811 | Slco4a1    | 0.141744  | 0.9734 | 0.222892  | 0.4358 | 0.256392  | 0.2051 | 0.367392  | 0.0481 |
| 10842885 | Slc17a9    | -0.067671 | 0.9990 | -0.326325 | 0.0355 | -0.376326 | 0.0052 | -0.335747 | 0.0120 |
| 10843013 | Zgpat      | 0.032439  | 0.9999 | 0.073306  | 0.8003 | 0.317281  | 0.0094 | 0.105354  | 0.5208 |
| 10843424 | Dpp7       | 0.391456  | 0.6081 | -0.241571 | 0.3545 | -0.244516 | 0.2158 | -0.383852 | 0.0308 |
| 10843438 | Uap111     | 0.490649  | 0.4002 | -0.621082 | 0.0031 | -0.646585 | 0.0009 | -0.995763 | 0.0000 |
| 10843575 | Fcn1       | -0.096797 | 0.9921 | -0.327999 | 0.0840 | -0.372552 | 0.0186 | -0.202763 | 0.2747 |
| 10843615 | Camsap1    | -0.071143 | 0.9999 | 0.350626  | 0.0522 | 0.491729  | 0.0014 | 0.429955  | 0.0043 |
| 10843711 | Snape4     | 0.157843  | 0.9106 | 0.298621  | 0.0624 | 0.309760  | 0.0238 | 0.281022  | 0.0426 |
| 10844112 | Zdhc12     | 0.069184  | 0.9998 | 0.253334  | 0.1754 | 0.132821  | 0.4712 | 0.312139  | 0.0314 |
| 10844302 | Dnm1       | 0.009909  | 0.9999 | -0.293695 | 0.1145 | -0.375587 | 0.0122 | -0.271936 | 0.0864 |
| 10844355 | Cdk9       | -0.001259 | 0.9999 | 0.043735  | 0.9228 | 0.355639  | 0.0231 | 0.273703  | 0.0977 |
| 10844390 | Stxbp1     | 0.067609  | 0.9999 | 0.271995  | 0.2931 | 0.426855  | 0.0203 | 0.395746  | 0.0321 |
| 10844482 | ---        | -0.089475 | 0.9999 | 0.359364  | 0.1845 | 0.444446  | 0.0341 | 0.317581  | 0.1665 |
| 10844502 | Zbtb34     | 0.177064  | 0.9620 | 0.183472  | 0.6091 | 0.399982  | 0.0427 | 0.140276  | 0.6137 |
| 10844542 | Gapvd1     | 0.063913  | 0.9999 | 0.240553  | 0.2735 | 0.495529  | 0.0016 | 0.289654  | 0.0793 |
| 10844587 | Psmd5      | -0.028078 | 0.9999 | 0.110811  | 0.8437 | 0.494576  | 0.0282 | 0.279629  | 0.2898 |
| 10844666 | Stom       | 0.166901  | 0.9990 | -0.976248 | 0.0072 | -1.059493 | 0.0015 | -1.081490 | 0.0009 |
| 10844681 | LOC652927  | -0.246651 | 0.7200 | -0.191309 | 0.2251 | -0.237619 | 0.0468 | -0.156032 | 0.2513 |
| 10844779 | Rc3h2      | 0.022734  | 0.9999 | 0.334993  | 0.0958 | 0.531073  | 0.0012 | 0.417427  | 0.0102 |
| 10845130 | Rbm43      | -0.024977 | 0.9999 | -0.153413 | 0.5771 | -0.316401 | 0.0431 | -0.400473 | 0.0079 |
| 10845368 | ---        | 0.170952  | 0.9223 | 0.288687  | 0.1347 | 0.205613  | 0.2358 | 0.353812  | 0.0208 |
| 10845384 | Nr4a2      | -0.053548 | 0.9999 | -0.369934 | 0.1901 | -0.350383 | 0.1259 | -0.487324 | 0.0234 |
| 10845407 | Cytip      | -0.202717 | 0.9942 | 1.030336  | 0.0069 | 0.611429  | 0.0976 | 0.441335  | 0.2893 |
| 10845429 | Acvr1      | 0.039299  | 0.9999 | 0.493652  | 0.0692 | 0.488720  | 0.0351 | 0.604481  | 0.0070 |
| 10845470 | Baz2b      | 0.250382  | 0.9421 | 0.469253  | 0.1159 | 0.589435  | 0.0142 | 0.453047  | 0.0715 |
| 10845508 | Cd302      | 0.425757  | 0.8045 | -0.783502 | 0.0063 | -0.846307 | 0.0013 | -0.905305 | 0.0005 |
| 10845767 | Cobll1     | 0.338409  | 0.8045 | 0.074464  | 0.9006 | 0.376194  | 0.0887 | 0.591991  | 0.0039 |
| 10845859 | Scn1a      | -0.115048 | 0.9999 | -0.117109 | 0.8544 | -0.259411 | 0.3939 | -0.545953 | 0.0286 |
| 10845917 | Scn7a      | 0.072807  | 0.9999 | -0.232058 | 0.3167 | -0.406319 | 0.0114 | -0.452918 | 0.0038 |
| 10845969 | Spc25      | -0.127741 | 0.9999 | -1.016411 | 0.0602 | -1.271431 | 0.0054 | -1.650697 | 0.0003 |
| 10846061 | Fastkd1    | 0.084112  | 0.9990 | 0.307275  | 0.1662 | 0.343223  | 0.0512 | 0.398396  | 0.0200 |
| 10846201 | Wipfl      | 0.071159  | 0.9998 | -0.285144 | 0.1321 | -0.294051 | 0.0577 | -0.337716 | 0.0257 |
| 10846346 | ---        | 0.405217  | 0.9447 | 0.775694  | 0.1097 | 0.799260  | 0.0469 | 0.830804  | 0.0373 |



|          |            |           |        |           |        |           |        |           |        |
|----------|------------|-----------|--------|-----------|--------|-----------|--------|-----------|--------|
| 10846740 | Frzb       | 0.181836  | 0.9223 | -0.420052 | 0.0210 | -0.467314 | 0.0039 | -0.418505 | 0.0091 |
| 10846854 | Serping1   | 0.524765  | 0.7989 | -0.813804 | 0.0241 | -1.244623 | 0.0001 | -0.860724 | 0.0061 |
| 10846928 | ---        | -0.009454 | 0.9999 | -0.482902 | 0.5024 | -1.150315 | 0.0071 | -1.274033 | 0.0022 |
| 10846942 | Olr476     | -0.169969 | 0.7905 | -0.233133 | 0.0471 | -0.191927 | 0.0655 | -0.169163 | 0.1208 |
| 10847062 | ---        | -0.362952 | 0.2902 | -0.198657 | 0.3038 | -0.276272 | 0.0458 | -0.089470 | 0.6573 |
| 10847283 | Ndufs3     | 0.030640  | 0.9999 | -0.193162 | 0.6293 | -0.419994 | 0.0525 | -0.434564 | 0.0440 |
| 10847291 | Ptpmt1     | -0.078689 | 0.9999 | -0.385157 | 0.2172 | -0.406416 | 0.0962 | -0.513626 | 0.0285 |
| 10847408 | ---        | 0.023828  | 0.9999 | 0.410216  | 0.1984 | 0.426088  | 0.0920 | 0.574039  | 0.0167 |
| 10847410 | Harbi11    | 0.126292  | 0.9653 | 0.639669  | 0.0001 | 0.545781  | 0.0004 | 0.723026  | 0.0000 |
| 10847474 | Creb3l1    | 0.181697  | 0.9968 | -0.672467 | 0.0947 | -1.015582 | 0.0020 | -1.062287 | 0.0009 |
| 10847572 | Cd82       | 0.031097  | 0.9999 | -0.767994 | 0.0471 | -0.998063 | 0.0026 | -0.994208 | 0.0021 |
| 10847646 | Hsd17b12   | -0.096089 | 0.9990 | -0.315471 | 0.2218 | -0.299989 | 0.1478 | -0.427789 | 0.0266 |
| 10847745 | Ldlrad3    | -0.137135 | 0.9830 | 0.142313  | 0.7139 | 0.071474  | 0.8166 | 0.431564  | 0.0199 |
| 10847932 | Depdc7     | 0.022996  | 0.9999 | 0.129231  | 0.7463 | 0.168392  | 0.4744 | 0.592079  | 0.0009 |
| 10847957 | Prrg4      | -0.377344 | 0.9544 | 0.841925  | 0.0624 | 1.160804  | 0.0024 | 0.893701  | 0.0193 |
| 10847995 | Rpl35a     | 0.030974  | 0.9999 | -0.048033 | 0.9394 | -0.402053 | 0.0474 | -0.279436 | 0.2176 |
| 10848038 | Fibin      | -0.213616 | 0.9999 | 1.471937  | 0.0039 | 1.542469  | 0.0011 | 1.608834  | 0.0005 |
| 10848042 | Ano3       | -0.140285 | 0.9998 | 0.084853  | 0.9216 | 0.929816  | 0.0017 | 0.525405  | 0.0975 |
| 10848281 | Grem1      | -0.110703 | 0.9921 | -0.781705 | 0.0001 | -0.899443 | 0.0000 | -0.469253 | 0.0088 |
| 10848287 | Scg5       | -0.074882 | 0.9998 | 0.151153  | 0.6057 | 0.041588  | 0.8862 | 0.357029  | 0.0253 |
| 10848293 | Arhgap11a  | -0.039309 | 0.9999 | -0.582358 | 0.4301 | -0.807234 | 0.1020 | -1.547747 | 0.0007 |
| 10848486 | RGD1565536 | -0.219421 | 0.9630 | 0.589166  | 0.0497 | 0.543914  | 0.0376 | 0.605889  | 0.0182 |
| 10848516 | Dnajc17    | -0.022496 | 0.9999 | -0.047145 | 0.9319 | -0.096799 | 0.7233 | -0.408779 | 0.0247 |
| 10848589 | Oip5       | 0.110936  | 0.9999 | -0.487807 | 0.4520 | -0.647297 | 0.1377 | -0.877033 | 0.0326 |
| 10848860 | Cdan1      | 0.111188  | 0.9653 | 0.086940  | 0.7787 | 0.376493  | 0.0049 | 0.153010  | 0.3541 |
| 10848908 | RGD1562326 | 0.233839  | 0.9010 | 0.342448  | 0.1818 | 0.435541  | 0.0284 | 0.322402  | 0.1308 |
| 10849020 | Tp53bp1    | -0.044126 | 0.9999 | 0.310350  | 0.0495 | 0.498373  | 0.0003 | 0.258067  | 0.0676 |
| 10849048 | Hisppd2a   | -0.456151 | 0.8945 | 0.682260  | 0.1418 | 0.835899  | 0.0237 | 0.683987  | 0.0743 |
| 10849156 | Frmf5      | -0.057451 | 0.9999 | 0.703157  | 0.0741 | 0.758324  | 0.0227 | 0.282450  | 0.5241 |
| 10849228 | ---        | -0.071021 | 0.9999 | -0.351702 | 0.1825 | -0.320331 | 0.1398 | -0.602345 | 0.0021 |
| 10849290 | Gatm       | -0.278231 | 0.9136 | -0.571550 | 0.0408 | -0.920190 | 0.0002 | -0.839364 | 0.0004 |
| 10849327 | Fbn1       | 0.284410  | 0.9853 | -0.199289 | 0.8395 | -0.454109 | 0.3291 | -0.855326 | 0.0306 |
| 10849472 | RGD1359452 | 0.030975  | 0.9999 | -0.249083 | 0.2573 | -0.189041 | 0.3109 | -0.373102 | 0.0182 |
| 10849488 | Atp8b4     | -0.048097 | 0.9999 | -0.209279 | 0.1983 | -0.298971 | 0.0150 | -0.200715 | 0.1332 |
| 10849614 | ---        | 0.019621  | 0.9999 | -0.840597 | 0.2580 | -0.955388 | 0.0888 | -1.683081 | 0.0012 |
| 10849695 | ---        | 0.093247  | 0.9934 | 0.159992  | 0.5691 | 0.388504  | 0.0133 | 0.375531  | 0.0166 |
| 10849737 | Bub1       | -0.100579 | 0.9999 | -1.260109 | 0.0158 | -1.245456 | 0.0082 | -1.899740 | 0.0001 |
| 10849823 | Ckap2l     | -0.222784 | 0.9921 | -0.677555 | 0.1434 | -0.772778 | 0.0370 | -1.207261 | 0.0007 |
| 10849889 | Cpxm1      | 0.537722  | 0.7200 | -0.507570 | 0.1403 | -0.490914 | 0.0840 | -0.896402 | 0.0007 |
| 10850104 | Slc23a2    | 0.058877  | 0.9999 | 0.311697  | 0.3659 | 0.627024  | 0.0064 | 0.508392  | 0.0288 |
| 10850131 | Pcna       | -0.018408 | 0.9999 | -0.430621 | 0.3350 | -0.400303 | 0.2518 | -0.800794 | 0.0077 |
| 10850228 | Jag1       | 0.557360  | 0.8614 | -0.559244 | 0.3288 | -0.257472 | 0.6465 | -0.932510 | 0.0176 |
| 10850257 | ---        | -0.042426 | 0.9999 | -0.499055 | 0.0316 | -0.518633 | 0.0108 | -0.522165 | 0.0092 |
| 10850390 | Snx5       | 0.057497  | 0.9999 | -0.374288 | 0.1429 | -0.436829 | 0.0323 | -0.587445 | 0.0027 |
| 10850490 | RGD1308023 | 0.223018  | 0.9620 | 0.469980  | 0.1129 | 0.510774  | 0.0356 | 0.565215  | 0.0179 |
| 10850494 | RGD1308023 | 0.213293  | 0.9570 | 0.201512  | 0.6282 | 0.463655  | 0.0379 | 0.336065  | 0.1689 |
| 10850541 | ---        | -0.121814 | 0.9999 | 0.152643  | 0.9142 | 1.570585  | 0.0015 | 0.861569  | 0.1037 |

|          |            |           |        |           |        |           |        |           |        |
|----------|------------|-----------|--------|-----------|--------|-----------|--------|-----------|--------|
| 10850543 | Napb       | -0.065872 | 0.9999 | 0.128794  | 0.9058 | 1.210923  | 0.0015 | 0.954731  | 0.0117 |
| 10850555 | Cst11      | 0.160341  | 0.8614 | 0.113622  | 0.5993 | 0.128347  | 0.3697 | 0.311382  | 0.0072 |
| 10850688 | Ninl       | 0.009343  | 0.9999 | -0.049392 | 0.9148 | -0.082539 | 0.7401 | -0.370418 | 0.0221 |
| 10850837 | Foxs1      | -0.009118 | 0.9999 | -0.334883 | 0.2528 | -0.479211 | 0.0252 | -0.474731 | 0.0259 |
| 10850949 | E2f1       | -0.109324 | 0.9999 | -0.465219 | 0.2961 | -0.460639 | 0.1820 | -1.172993 | 0.0002 |
| 10850979 | Ahcy       | -0.095558 | 0.9921 | -0.184650 | 0.4275 | -0.177940 | 0.3073 | -0.333538 | 0.0250 |
| 10851004 | Ncoa6      | 0.203937  | 0.9482 | 0.289656  | 0.3133 | 0.293744  | 0.1802 | 0.435832  | 0.0305 |
| 10851251 | Dsn1       | -0.101323 | 0.9999 | -0.428086 | 0.4901 | -0.758624 | 0.0477 | -0.886010 | 0.0176 |
| 10851280 | Rbl1       | -0.089990 | 0.9999 | -0.510001 | 0.0730 | -0.739964 | 0.0018 | -0.933772 | 0.0001 |
| 10851364 | RGD1563354 | -0.216974 | 0.9038 | -0.593965 | 0.0025 | -0.800500 | 0.0000 | -0.628359 | 0.0005 |
| 10851378 | ---        | -0.272174 | 0.8945 | -0.270011 | 0.4373 | -0.548559 | 0.0125 | -0.339625 | 0.1643 |
| 10851386 | Rpl13      | -0.021987 | 0.9999 | -0.119630 | 0.5963 | -0.147723 | 0.3099 | -0.249913 | 0.0490 |
| 10851407 | Chd6       | 0.299278  | 0.8614 | 0.302542  | 0.3484 | 0.567368  | 0.0093 | 0.300940  | 0.2320 |
| 10851502 | Serinc3    | 0.071107  | 0.9998 | 0.191700  | 0.4071 | 0.375107  | 0.0120 | 0.438593  | 0.0025 |
| 10851670 | Pltp       | 0.571229  | 0.7200 | -0.913861 | 0.0034 | -1.086622 | 0.0002 | -1.186486 | 0.0000 |
| 10851689 | Zfp335     | 0.132883  | 0.9921 | 0.213994  | 0.5352 | 0.437828  | 0.0307 | 0.352855  | 0.0977 |
| 10851715 | Ncoa5      | 0.128792  | 0.9653 | -0.055454 | 0.9012 | -0.258977 | 0.1227 | -0.422430 | 0.0062 |
| 10851947 | Ptgis      | -0.281320 | 0.9620 | 0.549665  | 0.1549 | 0.763529  | 0.0111 | 0.586247  | 0.0598 |
| 10851960 | Spata2     | 0.155232  | 0.9620 | 0.595883  | 0.0007 | 0.442775  | 0.0071 | 0.680073  | 0.0000 |
| 10851991 | Adnp       | 0.212342  | 0.8614 | 0.150302  | 0.5904 | 0.306689  | 0.0525 | 0.343138  | 0.0269 |
| 10852091 | Aurka      | 0.068147  | 0.9999 | -0.748391 | 0.1861 | -1.061497 | 0.0137 | -1.127841 | 0.0078 |
| 10852144 | Pmepa1     | -0.353292 | 0.9250 | 0.776721  | 0.0355 | 0.803164  | 0.0125 | 0.805277  | 0.0113 |
| 10852270 | Lama5      | 0.188440  | 0.9921 | 0.978356  | 0.0013 | 1.168488  | 0.0001 | 1.306045  | 0.0000 |
| 10852394 | Dido1      | 0.048253  | 0.9999 | 0.114503  | 0.7839 | 0.401641  | 0.0281 | 0.226965  | 0.2896 |
| 10852415 | Ythdf1     | -0.016611 | 0.9999 | 0.116629  | 0.6049 | 0.197840  | 0.1307 | 0.260924  | 0.0354 |
| 10852554 | Uckl1      | 0.008557  | 0.9999 | 0.227425  | 0.2051 | 0.342112  | 0.0112 | 0.341023  | 0.0104 |
| 10852620 | Bdnf       | -0.491439 | 0.4739 | 0.366063  | 0.1814 | 0.585318  | 0.0050 | 0.492012  | 0.0185 |
| 10852636 | Sqrdl      | -0.193004 | 0.9038 | -0.223488 | 0.3581 | -0.380154 | 0.0210 | -0.244768 | 0.1808 |
| 10852740 | Rpl10a     | -0.004173 | 0.9999 | -0.222763 | 0.1671 | -0.455060 | 0.0003 | -0.511651 | 0.0000 |
| 10853202 | Phtf2      | 0.071008  | 0.9999 | 0.376859  | 0.3084 | 0.574648  | 0.0278 | 0.439174  | 0.1137 |
| 10853324 | Abcb1b     | -0.022236 | 0.9999 | -0.982308 | 0.0155 | -0.424854 | 0.3295 | -0.852197 | 0.0200 |
| 10853467 | ---        | 0.127031  | 0.9921 | 0.252140  | 0.4243 | 0.404789  | 0.0498 | 0.266329  | 0.2571 |
| 10853471 | Cyp51      | 0.000163  | 0.9999 | 0.248353  | 0.5744 | 0.492433  | 0.0513 | 0.565483  | 0.0217 |
| 10853481 | Ankib1     | 0.101285  | 0.9990 | 0.455895  | 0.0592 | 0.549617  | 0.0072 | 0.486225  | 0.0175 |
| 10853508 | Gatad1     | 0.043116  | 0.9999 | -0.165200 | 0.4338 | -0.162848 | 0.2985 | -0.396480 | 0.0023 |
| 10853554 | Gng11      | -0.035904 | 0.9999 | -0.354432 | 0.0784 | -0.365184 | 0.0319 | -0.158081 | 0.4718 |
| 10853637 | Asb4       | -0.065724 | 0.9999 | -1.124455 | 0.0004 | -1.137893 | 0.0002 | -1.091516 | 0.0002 |
| 10853797 | Tes        | -0.229344 | 0.9734 | 0.817199  | 0.0110 | 0.699570  | 0.0171 | 0.729565  | 0.0115 |
| 10853816 | Cav1       | 0.009984  | 0.9999 | -1.166568 | 0.0095 | -1.244339 | 0.0024 | -1.375147 | 0.0006 |
| 10854100 | Fam71f1    | -0.388543 | 0.3730 | -0.297867 | 0.1092 | -0.305411 | 0.0476 | -0.307767 | 0.0462 |
| 10854199 | Tspan33    | -0.105308 | 0.9653 | 0.098333  | 0.7102 | 0.092269  | 0.5997 | 0.334296  | 0.0075 |
| 10854208 | Smo        | 0.168939  | 0.9921 | -0.337517 | 0.4358 | -0.347528 | 0.2736 | -0.566019 | 0.0436 |
| 10854286 | RGD1559502 | 0.141735  | 0.9620 | 0.038983  | 0.9363 | 0.372572  | 0.0183 | 0.175944  | 0.3628 |
| 10854544 | Chrm2      | 0.473918  | 0.8614 | 0.475595  | 0.3631 | 0.621947  | 0.0907 | 0.748918  | 0.0346 |
| 10854601 | Ubn2       | 0.118196  | 0.9921 | 0.406119  | 0.0780 | 0.505531  | 0.0084 | 0.461004  | 0.0159 |
| 10854645 | Tbxas1     | 0.067072  | 0.9999 | -0.335204 | 0.0739 | -0.365066 | 0.0211 | -0.392979 | 0.0113 |
| 10854685 | LOC679651  | 0.108992  | 0.9695 | 0.274262  | 0.1019 | 0.336799  | 0.0136 | 0.262843  | 0.0644 |

|          |           |           |        |           |        |           |        |           |        |
|----------|-----------|-----------|--------|-----------|--------|-----------|--------|-----------|--------|
| 10855118 | Arhgef5   | 0.020295  | 0.9999 | 0.337515  | 0.0673 | 0.559589  | 0.0003 | 0.738439  | 0.0000 |
| 10855185 | ---       | -0.227754 | 0.9999 | -0.778794 | 0.6518 | -1.936895 | 0.0316 | -1.625261 | 0.0828 |
| 10855416 | Tmem176a  | 0.513294  | 0.9010 | -0.873518 | 0.0938 | -1.099238 | 0.0101 | -1.121229 | 0.0077 |
| 10855449 | Gpnmb     | 0.344127  | 0.9630 | -1.548113 | 0.0003 | -1.785141 | 0.0000 | -2.162037 | 0.0000 |
| 10855615 | Chn2      | -0.110867 | 0.9624 | -0.221201 | 0.1741 | -0.332871 | 0.0076 | -0.184454 | 0.1898 |
| 10855637 | Wipf3     | -0.052515 | 0.9999 | 0.319300  | 0.1097 | 0.358331  | 0.0288 | 0.473850  | 0.0026 |
| 10855664 | MGC95152  | 0.121314  | 0.9934 | 0.309085  | 0.2831 | 0.553554  | 0.0066 | 0.689669  | 0.0006 |
| 10855674 | LOC499782 | -0.022807 | 0.9999 | -0.231463 | 0.2251 | -0.385780 | 0.0061 | -0.341700 | 0.0150 |
| 10855802 | ---       | -0.070521 | 0.9624 | -0.052444 | 0.7762 | -0.192010 | 0.0177 | -0.118593 | 0.1917 |
| 10855946 | ---       | -0.327800 | 0.9999 | -0.608165 | 0.6941 | -2.124522 | 0.0050 | -1.797228 | 0.0179 |
| 10856043 | Mad2l1    | 0.050262  | 0.9999 | -0.587380 | 0.1971 | -0.560384 | 0.1273 | -0.785241 | 0.0227 |
| 10856082 | ---       | -0.259193 | 0.7409 | -0.086297 | 0.8037 | -0.296193 | 0.0474 | -0.371301 | 0.0099 |
| 10856187 | LOC498750 | 0.126167  | 0.9921 | -0.242235 | 0.4800 | -0.629778 | 0.0024 | -0.425410 | 0.0459 |
| 10856386 | Tmem150   | 0.151043  | 0.9507 | 0.250889  | 0.2049 | 0.169441  | 0.3396 | 0.322067  | 0.0322 |
| 10856415 | Capg      | 0.077577  | 0.9999 | -0.445327 | 0.3289 | -0.507718 | 0.1301 | -0.698794 | 0.0269 |
| 10856545 | Loxl3     | -0.053087 | 0.9999 | -0.346131 | 0.4800 | -0.748111 | 0.0118 | -0.680779 | 0.0222 |
| 10856712 | Bola3     | -0.074055 | 0.9999 | -0.308767 | 0.3068 | -0.385748 | 0.0797 | -0.550173 | 0.0080 |
| 10856747 | Nagk      | 0.300672  | 0.7312 | -0.195799 | 0.4383 | -0.436408 | 0.0061 | -0.620279 | 0.0001 |
| 10856948 | Tgfa      | -0.134750 | 0.9658 | 0.236736  | 0.3226 | 0.401344  | 0.0154 | 0.284490  | 0.1090 |
| 10857002 | Aak1      | 0.210378  | 0.8669 | 0.195137  | 0.4358 | 0.266727  | 0.1128 | 0.349594  | 0.0290 |
| 10857080 | Copg      | -0.002826 | 0.9999 | -0.153437 | 0.4349 | -0.185879 | 0.1724 | -0.302900 | 0.0143 |
| 10857157 | Txnrd3    | 0.250175  | 0.8541 | 0.116586  | 0.7554 | 0.498186  | 0.0030 | 0.331350  | 0.0572 |
| 10857177 | ---       | -0.126246 | 0.9819 | -0.155559 | 0.6255 | -0.360278 | 0.0352 | -0.352942 | 0.0398 |
| 10857310 | Lsm3      | -0.146246 | 0.9653 | -0.402913 | 0.0520 | -0.598244 | 0.0007 | -0.622522 | 0.0004 |
| 10857314 | Slc6a6    | 0.075955  | 0.9999 | 0.412549  | 0.4877 | 1.091551  | 0.0023 | 0.936404  | 0.0079 |
| 10857403 | ---       | -0.224617 | 0.7905 | -0.000649 | 0.9987 | -0.272823 | 0.0437 | -0.211942 | 0.1451 |
| 10857460 | Glt8d4    | 0.249277  | 0.9201 | -0.460965 | 0.0823 | -0.611442 | 0.0053 | -0.452346 | 0.0449 |
| 10857546 | Itp1      | 0.088669  | 0.9999 | 0.300594  | 0.2772 | 0.405615  | 0.0437 | 0.310071  | 0.1534 |
| 10857673 | Setd5     | 0.072888  | 0.9999 | 0.144866  | 0.6690 | 0.343062  | 0.0513 | 0.381282  | 0.0273 |
| 10857739 | Brpf1     | 0.006867  | 0.9999 | 0.249743  | 0.1668 | 0.397569  | 0.0042 | 0.219990  | 0.1523 |
| 10857762 | Arpc4     | -0.048950 | 0.9999 | -0.191561 | 0.2723 | -0.248528 | 0.0523 | -0.265422 | 0.0358 |
| 10857783 | Il17re    | -0.012349 | 0.9999 | 0.353102  | 0.0471 | -0.006803 | 0.9823 | 0.254379  | 0.1246 |
| 10857826 | Credl1    | 0.087055  | 0.9936 | 0.349046  | 0.0396 | 0.169403  | 0.3330 | 0.405567  | 0.0048 |
| 10857838 | Fancd2    | 0.132517  | 0.9999 | -0.557491 | 0.2319 | -0.660424 | 0.0624 | -1.054774 | 0.0016 |
| 10858152 | LOC502876 | 0.115846  | 0.9867 | 0.211447  | 0.3982 | 0.410033  | 0.0118 | 0.207507  | 0.2822 |
| 10858165 | Cxcl12    | 0.487788  | 0.8614 | -1.253645 | 0.0007 | -1.327724 | 0.0002 | -1.369775 | 0.0001 |
| 10858282 | Jarid1a   | 0.145891  | 0.9867 | 0.215442  | 0.5417 | 0.534957  | 0.0085 | 0.280141  | 0.2323 |
| 10858408 | A2m       | 0.259395  | 0.8932 | -0.394127 | 0.1271 | -0.705983 | 0.0006 | -0.723114 | 0.0004 |
| 10858553 | Clec4a1   | 0.467971  | 0.7200 | -0.963999 | 0.0001 | -1.005930 | 0.0000 | -0.869758 | 0.0002 |
| 10858559 | Clec4a3   | 0.562388  | 0.3730 | -0.854855 | 0.0002 | -0.870680 | 0.0001 | -0.815430 | 0.0002 |
| 10858573 | Clecsf6   | 0.087524  | 0.9867 | -0.246776 | 0.0994 | -0.282651 | 0.0220 | -0.281620 | 0.0215 |
| 10858655 | Clr       | 0.121051  | 0.9999 | -1.040608 | 0.0034 | -1.220333 | 0.0003 | -1.208586 | 0.0002 |
| 10858686 | Phb2      | -0.093702 | 0.9695 | -0.222335 | 0.1347 | -0.098507 | 0.5282 | -0.239244 | 0.0479 |
| 10858707 | Cdca3     | -0.095982 | 0.9999 | -1.092527 | 0.0558 | -1.198790 | 0.0137 | -2.241354 | 0.0000 |
| 10859047 | Foxm1     | 0.016394  | 0.9999 | -0.510939 | 0.2623 | -0.646530 | 0.0547 | -1.041574 | 0.0011 |
| 10859086 | Clec2d11  | 0.016106  | 0.9999 | -0.695330 | 0.0435 | -0.632417 | 0.0360 | -0.700314 | 0.0180 |
| 10859090 | LOC689800 | 0.130577  | 0.9843 | -0.854232 | 0.0000 | -0.843474 | 0.0000 | -0.924650 | 0.0000 |

|          |            |           |        |           |        |           |        |           |        |
|----------|------------|-----------|--------|-----------|--------|-----------|--------|-----------|--------|
| 10859108 | Clec2g     | 0.059508  | 0.9999 | -1.012057 | 0.0001 | -1.042284 | 0.0000 | -1.155133 | 0.0000 |
| 10859119 | Clec12a    | 0.054484  | 0.9995 | -0.058151 | 0.8338 | -0.261215 | 0.0201 | -0.106032 | 0.4669 |
| 10859249 | Crebl2     | 0.270600  | 0.8632 | 0.434358  | 0.0731 | 0.491727  | 0.0156 | 0.473992  | 0.0193 |
| 10859296 | Emp1       | 0.067803  | 0.9999 | -1.012141 | 0.0017 | -1.038285 | 0.0006 | -1.538640 | 0.0000 |
| 10859382 | ---        | 0.069885  | 0.9999 | -0.373581 | 0.1433 | -0.422146 | 0.0390 | -0.435290 | 0.0321 |
| 10859392 | Mgst1      | 0.448117  | 0.8622 | -1.121751 | 0.0017 | -0.877827 | 0.0086 | -0.662994 | 0.0548 |
| 10859590 | Etnk1      | 0.024786  | 0.9999 | 0.253247  | 0.3137 | 0.492364  | 0.0046 | 0.234831  | 0.2473 |
| 10859636 | Rassf8     | -0.062600 | 0.9999 | 0.567647  | 0.0093 | 0.575856  | 0.0037 | 0.418713  | 0.0387 |
| 10859660 | Stk38l     | -0.363778 | 0.9653 | 0.975788  | 0.0631 | 1.081177  | 0.0151 | 1.070218  | 0.0155 |
| 10859671 | LOC362464  | 0.117762  | 0.9983 | 1.010290  | 0.0000 | 0.528728  | 0.0197 | 0.585309  | 0.0082 |
| 10859693 | Ppfbp1     | 0.247383  | 0.9443 | -0.350545 | 0.3058 | -0.238554 | 0.4262 | -0.832679 | 0.0004 |
| 10859760 | Rps4y2     | -0.049967 | 0.9999 | -0.327107 | 0.3415 | -0.330538 | 0.2062 | -0.703996 | 0.0020 |
| 10859859 | Rbm33      | 0.184198  | 0.9067 | 0.263057  | 0.2104 | 0.422464  | 0.0071 | 0.318607  | 0.0487 |
| 10859988 | ---        | 0.013364  | 0.9999 | 0.281169  | 0.2646 | 0.410789  | 0.0246 | 0.278560  | 0.1654 |
| 10860021 | Slc4a2     | 0.099991  | 0.9921 | 0.349388  | 0.0679 | 0.532251  | 0.0009 | 0.241546  | 0.1808 |
| 10860111 | Klhl7      | 0.072475  | 0.9999 | 0.424816  | 0.1355 | 0.414840  | 0.0773 | 0.476083  | 0.0377 |
| 10860152 | Mll5       | 0.156337  | 0.9814 | 0.241165  | 0.4726 | 0.467214  | 0.0246 | 0.332119  | 0.1398 |
| 10860217 | Armc10     | 0.040317  | 0.9999 | -0.292773 | 0.0746 | -0.219098 | 0.1381 | -0.323615 | 0.0182 |
| 10860226 | Lrrc17     | 0.891432  | 0.7200 | -0.398046 | 0.6095 | -1.235225 | 0.0032 | -1.895953 | 0.0000 |
| 10860231 | Fgl2       | -0.204342 | 0.9921 | -0.105932 | 0.9089 | -0.275726 | 0.5204 | -0.928691 | 0.0033 |
| 10860309 | ---        | -0.182354 | 0.8045 | -0.228229 | 0.1000 | -0.280693 | 0.0131 | -0.144307 | 0.2822 |
| 10860481 | Sema3a     | -0.091987 | 0.9981 | -0.851953 | 0.0000 | -0.922752 | 0.0000 | -0.831805 | 0.0000 |
| 10860499 | Sema3d     | 0.455260  | 0.8541 | -0.991977 | 0.0026 | -1.074814 | 0.0005 | -1.510317 | 0.0000 |
| 10860531 | RGD1563349 | -0.257904 | 0.7200 | -0.111493 | 0.6647 | -0.270839 | 0.0427 | -0.229882 | 0.1002 |
| 10860584 | Dbf4       | -0.024345 | 0.9999 | -0.676944 | 0.0445 | -0.791545 | 0.0061 | -1.072461 | 0.0002 |
| 10860632 | Akap9      | 0.196438  | 0.9620 | 0.424140  | 0.1140 | 0.550238  | 0.0110 | 0.449991  | 0.0418 |
| 10860691 | Krit1      | 0.016120  | 0.9999 | 0.387642  | 0.3474 | 0.580706  | 0.0415 | 0.640964  | 0.0220 |
| 10860765 | Cdk6       | -0.047073 | 0.9999 | -0.498944 | 0.0428 | -0.441144 | 0.0416 | -0.814923 | 0.0001 |
| 10861066 | Tmem106b   | 0.151511  | 0.9734 | 0.229001  | 0.4658 | 0.396748  | 0.0449 | 0.416436  | 0.0337 |
| 10861226 | Fam3c      | 0.015310  | 0.9999 | -0.201530 | 0.4284 | -0.336475 | 0.0414 | -0.391496 | 0.0150 |
| 10861242 | Aass       | 0.190552  | 0.8743 | -0.620051 | 0.0001 | -0.748125 | 0.0000 | -0.617687 | 0.0000 |
| 10861399 | Zfp800     | 0.040891  | 0.9999 | 0.273012  | 0.4838 | 0.537611  | 0.0243 | 0.160624  | 0.6432 |
| 10861410 | Pax4       | -0.256627 | 0.4060 | -0.298258 | 0.0083 | -0.191126 | 0.0757 | -0.027801 | 0.8867 |
| 10861676 | Rpl38      | -0.114663 | 0.9624 | -0.141720 | 0.5226 | -0.296290 | 0.0244 | -0.147577 | 0.3561 |
| 10861678 | Plxna4a    | 0.204490  | 0.9906 | 0.805770  | 0.0140 | 0.598861  | 0.0482 | 0.638552  | 0.0330 |
| 10861778 | Cnot4      | 0.047956  | 0.9999 | 0.238825  | 0.5018 | 0.375210  | 0.0920 | 0.438090  | 0.0432 |
| 10861811 | Fam180a    | 0.484053  | 0.3122 | -0.816027 | 0.0000 | -0.930101 | 0.0000 | -0.878731 | 0.0000 |
| 10861835 | Ptn        | 0.871807  | 0.7200 | -2.947813 | 0.0000 | -2.831378 | 0.0000 | -2.829177 | 0.0000 |
| 10861968 | Zc3hav11   | 0.164763  | 0.9912 | -0.436780 | 0.1555 | -0.375727 | 0.1457 | -0.615640 | 0.0090 |
| 10861976 | Zc3hav1    | 0.209554  | 0.9750 | -0.489119 | 0.1575 | -0.450047 | 0.1148 | -0.629787 | 0.0189 |
| 10861997 | Hipk2      | 0.061175  | 0.9999 | 0.318746  | 0.3961 | 0.374132  | 0.1606 | 0.508391  | 0.0421 |
| 10862014 | Parp12     | 0.177485  | 0.9921 | -0.509599 | 0.1185 | -0.720563 | 0.0059 | -0.712661 | 0.0055 |
| 10862082 | Braf       | 0.166605  | 0.9201 | 0.406189  | 0.0127 | 0.434637  | 0.0031 | 0.501672  | 0.0005 |
| 10862172 | LOC286960  | 0.321047  | 0.3730 | 0.202740  | 0.2413 | 0.281632  | 0.0281 | 0.290512  | 0.0219 |
| 10862254 | Fam131b    | -0.223132 | 0.8730 | -0.177450 | 0.5596 | -0.290307 | 0.1095 | -0.426432 | 0.0119 |
| 10862338 | Ezh2       | 0.108301  | 0.9999 | -0.382416 | 0.4027 | -0.526380 | 0.0909 | -0.619410 | 0.0404 |
| 10862359 | ---        | -0.154497 | 0.9999 | -0.586452 | 0.7109 | -2.157828 | 0.0044 | -1.739707 | 0.0224 |

|          |            |           |        |           |        |           |        |           |        |
|----------|------------|-----------|--------|-----------|--------|-----------|--------|-----------|--------|
| 10862424 | Igf2bp3    | 0.049546  | 0.9999 | -0.185146 | 0.4901 | -0.164339 | 0.4147 | -0.392965 | 0.0145 |
| 10862453 | ---        | 0.610414  | 0.9171 | 0.552760  | 0.5600 | 1.217037  | 0.0244 | 0.699301  | 0.2653 |
| 10862527 | Skap2      | 0.370048  | 0.7989 | -0.501476 | 0.0598 | -0.757627 | 0.0008 | -0.694267 | 0.0016 |
| 10862605 | RGD1310827 | -0.308880 | 0.9620 | -1.138350 | 0.0012 | -0.951213 | 0.0038 | -1.329462 | 0.0001 |
| 10862675 | LOC499782  | -0.022807 | 0.9999 | -0.231463 | 0.2251 | -0.385780 | 0.0061 | -0.341700 | 0.0150 |
| 10862795 | Nap115     | -0.039598 | 0.9999 | 0.202848  | 0.7833 | 0.999251  | 0.0017 | 0.902820  | 0.0036 |
| 10862836 | ---        | -0.028473 | 0.9999 | 0.042066  | 0.9047 | 0.135130  | 0.3643 | 0.290685  | 0.0179 |
| 10862842 | Hpgds      | 0.686730  | 0.1825 | -0.864946 | 0.0002 | -0.898194 | 0.0001 | -0.704359 | 0.0011 |
| 10863079 | Rpia       | -0.159973 | 0.9911 | -0.497647 | 0.0723 | -0.170187 | 0.5934 | -0.485226 | 0.0399 |
| 10863115 | Rmnd5a     | 0.095541  | 0.9934 | 0.313358  | 0.1171 | 0.427761  | 0.0077 | 0.388985  | 0.0150 |
| 10863187 | Rnf181     | -0.056944 | 0.9999 | 0.369190  | 0.0731 | 0.397209  | 0.0225 | 0.383978  | 0.0271 |
| 10863215 | Vamp5      | -0.059674 | 0.9999 | 0.870463  | 0.0189 | 0.777235  | 0.0205 | 1.103372  | 0.0007 |
| 10863262 | LOC684322  | -0.097028 | 0.9624 | 0.023121  | 0.9505 | 0.235829  | 0.0351 | 0.106567  | 0.4559 |
| 10863502 | Wdr54      | -0.074753 | 0.9999 | 0.347788  | 0.2930 | 0.616785  | 0.0082 | 0.487084  | 0.0408 |
| 10863608 | Cyp26b1    | 0.063699  | 0.9999 | 0.143896  | 0.7329 | 0.443077  | 0.0260 | 0.516071  | 0.0076 |
| 10863635 | Spr        | -0.163486 | 0.9921 | -0.319664 | 0.4137 | -0.589296 | 0.0201 | -0.510703 | 0.0481 |
| 10863653 | LOC312502  | -0.105825 | 0.9978 | 0.602318  | 0.0059 | 0.770520  | 0.0002 | 0.660828  | 0.0008 |
| 10863714 | Pcyox1     | 0.050152  | 0.9999 | 0.217159  | 0.3722 | 0.263496  | 0.1277 | 0.331190  | 0.0458 |
| 10863808 | Arhgap25   | 0.143408  | 0.9700 | -0.345058 | 0.1268 | -0.526798 | 0.0034 | -0.478267 | 0.0070 |
| 10863926 | Abtb1      | 0.299416  | 0.8437 | 0.242981  | 0.4424 | 0.264464  | 0.2435 | 0.498861  | 0.0113 |
| 10863950 | Mcm2       | 0.040601  | 0.9999 | -0.341829 | 0.2298 | -0.523423 | 0.0125 | -0.663315 | 0.0012 |
| 10864174 | ---        | 0.200654  | 0.9010 | 0.195783  | 0.4828 | 0.198826  | 0.3188 | 0.340978  | 0.0493 |
| 10864185 | Adamts9    | -0.046778 | 0.9999 | -0.247180 | 0.2840 | -0.284530 | 0.0993 | -0.364102 | 0.0275 |
| 10864243 | Magi1      | 0.074884  | 0.9999 | 0.390405  | 0.0976 | 0.631606  | 0.0010 | 0.618294  | 0.0010 |
| 10864269 | Magi1      | 0.116938  | 0.9972 | 0.332624  | 0.2633 | 0.468052  | 0.0306 | 0.498670  | 0.0193 |
| 10864459 | Pdzrn3     | -0.168349 | 0.9632 | 0.579556  | 0.0079 | 0.711966  | 0.0004 | 0.472116  | 0.0179 |
| 10864538 | ---        | 0.059257  | 0.9853 | 0.013995  | 0.9627 | 0.118687  | 0.1883 | 0.208693  | 0.0096 |
| 10864680 | Sec13      | -0.130497 | 0.9624 | -0.145481 | 0.5815 | -0.209513 | 0.1979 | -0.322292 | 0.0288 |
| 10864722 | LOC362419  | -0.121178 | 0.9665 | -0.328602 | 0.0663 | -0.307392 | 0.0467 | -0.468757 | 0.0014 |
| 10864769 | Rpl32      | -0.039793 | 0.9999 | -0.145750 | 0.6136 | -0.321970 | 0.0421 | -0.345523 | 0.0272 |
| 10864797 | Plxnd1     | 0.260862  | 0.9624 | -0.409633 | 0.3480 | -0.633726 | 0.0349 | -0.531976 | 0.0895 |
| 10864848 | Alox5      | -0.248089 | 0.2425 | -0.250801 | 0.0108 | -0.198100 | 0.0288 | -0.101923 | 0.3529 |
| 10864874 | Rassf4     | 0.063835  | 0.9999 | -1.508334 | 0.0000 | -1.663815 | 0.0000 | -1.574998 | 0.0000 |
| 10864910 | Csgalnact2 | -0.090302 | 0.9999 | 0.336380  | 0.3708 | 0.516607  | 0.0431 | 0.331373  | 0.2571 |
| 10865081 | Adipor2    | -0.055658 | 0.9999 | 0.248660  | 0.1958 | 0.442149  | 0.0023 | 0.461716  | 0.0011 |
| 10865129 | Wnk1       | 0.096047  | 0.9999 | 0.538931  | 0.0241 | 0.537049  | 0.0114 | 0.475507  | 0.0260 |
| 10865236 | LOC685601  | -0.052852 | 0.9999 | 0.318600  | 0.2735 | 0.406385  | 0.0575 | 0.573972  | 0.0047 |
| 10865243 | Mical3     | 0.025233  | 0.9999 | 0.381905  | 0.1984 | 0.499164  | 0.0279 | 0.433149  | 0.0625 |
| 10865329 | Apobec1    | 0.166208  | 0.9620 | -0.397480 | 0.0566 | -0.451373 | 0.0111 | -0.470729 | 0.0070 |
| 10865336 | ---        | -0.056554 | 0.9999 | -0.320382 | 0.1735 | -0.395042 | 0.0313 | -0.284350 | 0.1540 |
| 10865369 | C3ar1      | -0.098325 | 0.9999 | -1.349391 | 0.0000 | -1.228757 | 0.0001 | -1.056858 | 0.0004 |
| 10865442 | C1s        | 0.599861  | 0.9333 | -1.551765 | 0.0139 | -1.842780 | 0.0012 | -1.768919 | 0.0014 |
| 10865452 | Emg1       | -0.121095 | 0.9620 | -0.339142 | 0.0202 | -0.285858 | 0.0311 | -0.396668 | 0.0018 |
| 10865463 | Ptpn6      | 0.232442  | 0.9553 | -0.585789 | 0.0309 | -0.827224 | 0.0005 | -0.535027 | 0.0252 |
| 10865502 | Eno2       | 0.020078  | 0.9999 | 0.663044  | 0.0007 | 0.709974  | 0.0002 | 0.660234  | 0.0003 |
| 10865527 | Tpi1       | -0.161527 | 0.8622 | -0.300777 | 0.0275 | -0.395333 | 0.0010 | -0.233537 | 0.0617 |
| 10865562 | Leprel2    | 0.167449  | 0.9921 | -0.181425 | 0.7567 | -0.546204 | 0.0415 | -0.613126 | 0.0195 |

|          |            |           |        |           |        |           |        |           |        |
|----------|------------|-----------|--------|-----------|--------|-----------|--------|-----------|--------|
| 10865578 | Gpr162     | 0.075389  | 0.9968 | 0.207424  | 0.2801 | 0.163399  | 0.3088 | 0.345187  | 0.0104 |
| 10865585 | Cd4        | 0.181672  | 0.9661 | -0.538728 | 0.0389 | -0.664642 | 0.0032 | -0.577099 | 0.0097 |
| 10865630 | Ncapd2     | 0.295723  | 0.9299 | -0.527748 | 0.1209 | -0.500438 | 0.0789 | -0.888397 | 0.0008 |
| 10865715 | Cd9        | 0.196123  | 0.9624 | -0.616404 | 0.0140 | -0.434109 | 0.0631 | -0.459893 | 0.0477 |
| 10865738 | Kcna6      | 0.020729  | 0.9999 | 0.717635  | 0.0168 | 0.533162  | 0.0551 | 0.291934  | 0.3867 |
| 10865752 | Rad51ap1   | -0.048596 | 0.9999 | -0.183295 | 0.3282 | -0.250420 | 0.0591 | -0.418622 | 0.0009 |
| 10865800 | Tspan9     | -0.134583 | 0.9921 | -0.358516 | 0.1904 | -0.503150 | 0.0157 | -0.601609 | 0.0029 |
| 10865960 | LOC689757  | -0.416859 | 0.7312 | -0.644510 | 0.0088 | -0.503428 | 0.0270 | -0.544950 | 0.0147 |
| 10865974 | Clec2h     | 0.066763  | 0.9624 | 0.091781  | 0.4484 | 0.115846  | 0.1614 | 0.174335  | 0.0219 |
| 10865981 | Ankrd13c   | -0.125448 | 0.9977 | 0.476390  | 0.0984 | 0.627552  | 0.0076 | 0.798320  | 0.0005 |
| 10866142 | Klra7      | 0.012759  | 0.9999 | -0.150160 | 0.2465 | -0.144547 | 0.1592 | -0.192766 | 0.0462 |
| 10866332 | ---        | -0.031667 | 0.9999 | 0.035732  | 0.9587 | 0.134067  | 0.6241 | 0.400119  | 0.0448 |
| 10866374 | Lrp6       | 0.149831  | 0.9734 | 0.364466  | 0.1273 | 0.480181  | 0.0119 | 0.395403  | 0.0428 |
| 10866401 | Dusp16     | -0.136823 | 0.9990 | 0.633239  | 0.0461 | 0.519016  | 0.0659 | 0.755248  | 0.0047 |
| 10866410 | Gpr19      | 0.061132  | 0.9999 | -0.145867 | 0.6954 | -0.231001 | 0.2756 | -0.425297 | 0.0199 |
| 10866486 | ---        | 0.050758  | 0.9999 | -0.392602 | 0.6130 | -0.971973 | 0.0211 | -0.691095 | 0.1283 |
| 10866503 | ---        | 0.050758  | 0.9999 | -0.392602 | 0.6130 | -0.971973 | 0.0211 | -0.691095 | 0.1283 |
| 10866507 | Art4       | -0.319941 | 0.8945 | 0.476674  | 0.1473 | 0.394418  | 0.1606 | 0.575389  | 0.0269 |
| 10866526 | Arhgdib    | 0.321606  | 0.9653 | -1.108822 | 0.0099 | -1.075239 | 0.0059 | -0.742393 | 0.0697 |
| 10866535 | Rerg       | 0.320061  | 0.9038 | -0.911910 | 0.0017 | -0.864228 | 0.0015 | -0.953744 | 0.0004 |
| 10866544 | Eps8       | -0.188975 | 0.9819 | -0.454874 | 0.1575 | -0.669091 | 0.0073 | -1.036985 | 0.0000 |
| 10866693 | Gys2       | -0.055217 | 0.9921 | -0.140349 | 0.2732 | -0.184942 | 0.0484 | -0.096119 | 0.4041 |
| 10866835 | Casc1      | 0.112601  | 0.9819 | 0.404386  | 0.0144 | 0.253393  | 0.1084 | 0.342108  | 0.0222 |
| 10866959 | LOC690784  | 0.163371  | 0.9010 | 0.105475  | 0.7141 | 0.263675  | 0.0633 | 0.278631  | 0.0487 |
| 10866986 | ---        | -0.001187 | 0.9999 | 0.414209  | 0.1889 | 0.663956  | 0.0054 | 0.696560  | 0.0028 |
| 10866988 | Tmtc1      | -0.037088 | 0.9999 | 0.241426  | 0.5479 | 0.456683  | 0.0533 | 0.601788  | 0.0078 |
| 10867008 | ---        | 0.018233  | 0.9999 | -0.257910 | 0.3462 | -0.486181 | 0.0088 | -0.296592 | 0.1459 |
| 10867026 | Bhlhe41    | 0.430387  | 0.8614 | -0.301127 | 0.6043 | -0.444049 | 0.2077 | -0.652217 | 0.0432 |
| 10867254 | Arfgef1    | 0.211012  | 0.8959 | 0.600936  | 0.0010 | 0.888818  | 0.0000 | 0.667464  | 0.0001 |
| 10867416 | Cyld       | 0.044436  | 0.9999 | 0.491733  | 0.1618 | 0.832659  | 0.0022 | 0.587862  | 0.0332 |
| 10867499 | ---        | 0.070441  | 0.9999 | -0.285355 | 0.2981 | -0.483836 | 0.0120 | -0.354297 | 0.0809 |
| 10867593 | Gdf6       | -0.256360 | 0.9620 | -0.592234 | 0.0829 | -0.775543 | 0.0060 | -1.000019 | 0.0003 |
| 10867614 | Ccne2      | -0.096440 | 0.9999 | -0.518405 | 0.3352 | -0.787975 | 0.0351 | -1.161125 | 0.0012 |
| 10867662 | ---        | -0.071297 | 0.9999 | -0.245682 | 0.3279 | -0.358408 | 0.0417 | -0.216870 | 0.2902 |
| 10867761 | Mmp16      | -0.027820 | 0.9999 | -0.850083 | 0.0146 | -1.141620 | 0.0003 | -1.173165 | 0.0002 |
| 10867914 | ---        | 0.130290  | 0.8973 | 0.148816  | 0.3449 | 0.214859  | 0.0497 | 0.249580  | 0.0192 |
| 10867919 | RGD1304693 | -0.000494 | 0.9999 | -0.546048 | 0.2821 | -0.623118 | 0.1007 | -1.224734 | 0.0005 |
| 10868017 | Lymr2      | 0.058750  | 0.9999 | 0.417522  | 0.1203 | 0.619736  | 0.0039 | 0.402269  | 0.0755 |
| 10868123 | ---        | -0.088632 | 0.9921 | -0.090976 | 0.7801 | -0.374513 | 0.0080 | -0.230170 | 0.1362 |
| 10868191 | Csgalnact2 | -0.119804 | 0.9998 | 0.311297  | 0.4251 | 0.516215  | 0.0419 | 0.339566  | 0.2382 |
| 10868315 | Nfx1       | 0.077201  | 0.9990 | 0.134008  | 0.6598 | 0.407201  | 0.0088 | 0.478769  | 0.0016 |
| 10868349 | Ubap1      | -0.108285 | 0.9921 | 0.166509  | 0.5840 | 0.355683  | 0.0374 | 0.258301  | 0.1670 |
| 10868595 | ---        | 0.074606  | 0.9999 | -0.766370 | 0.0355 | -0.673136 | 0.0371 | -0.943117 | 0.0023 |
| 10868601 | Reck       | 0.052529  | 0.9999 | -0.252650 | 0.2619 | -0.190513 | 0.3189 | -0.421322 | 0.0081 |
| 10868643 | Melk       | 0.290677  | 0.9706 | -0.593584 | 0.2327 | -0.813887 | 0.0283 | -1.015949 | 0.0045 |
| 10868669 | Zcchc7     | 0.268190  | 0.9223 | 0.272168  | 0.4976 | 0.432811  | 0.0850 | 0.493413  | 0.0448 |
| 10868718 | Dcaf10     | 0.048900  | 0.9999 | 0.383006  | 0.2640 | 0.734286  | 0.0028 | 0.345278  | 0.2211 |

|          |            |           |        |           |        |           |        |           |        |
|----------|------------|-----------|--------|-----------|--------|-----------|--------|-----------|--------|
| 10868798 | Tdrd7      | -0.132356 | 0.9624 | 0.215373  | 0.3389 | 0.390900  | 0.0109 | 0.368615  | 0.0159 |
| 10868855 | Anp32b     | 0.046733  | 0.9999 | -0.147910 | 0.5067 | -0.095030 | 0.6045 | -0.285325 | 0.0332 |
| 10868881 | Col15a1    | 0.304191  | 0.9544 | -0.540354 | 0.1779 | -0.598735 | 0.0584 | -0.707517 | 0.0215 |
| 10868986 | Tmeff1     | -0.093723 | 0.9999 | 0.767088  | 0.0142 | 0.690414  | 0.0147 | 0.725644  | 0.0092 |
| 10869002 | Lppr1      | -0.071375 | 0.9921 | -0.148573 | 0.3787 | -0.225253 | 0.0487 | -0.149944 | 0.2483 |
| 10869050 | Smc2       | 0.098709  | 0.9999 | -0.438397 | 0.5101 | -0.508984 | 0.2633 | -0.829770 | 0.0393 |
| 10869094 | Nipsnap3b  | 0.100345  | 0.9999 | -0.231552 | 0.5278 | -0.357999 | 0.1157 | -0.537049 | 0.0112 |
| 10869106 | Slc44a1    | 0.288473  | 0.8437 | -0.670544 | 0.0010 | -0.708310 | 0.0003 | -0.866286 | 0.0000 |
| 10869151 | Tmem38b    | -0.054810 | 0.9999 | 0.391981  | 0.2257 | 0.437841  | 0.0797 | 0.521119  | 0.0312 |
| 10869158 | Zfp462     | 0.216159  | 0.9620 | 0.420555  | 0.1670 | 0.424520  | 0.0846 | 0.648989  | 0.0047 |
| 10869165 | ---        | 0.127750  | 0.9990 | 0.348738  | 0.3558 | 0.266438  | 0.3947 | 0.544179  | 0.0346 |
| 10869253 | Ugcg       | 0.005058  | 0.9999 | -0.231596 | 0.6288 | -0.309918 | 0.2945 | -0.522953 | 0.0430 |
| 10869282 | RGD1310951 | 0.089361  | 0.9852 | 0.230095  | 0.1397 | 0.131566  | 0.3803 | 0.321274  | 0.0079 |
| 10869303 | Slc31a2    | 0.006770  | 0.9999 | 0.455101  | 0.1987 | 0.598007  | 0.0271 | 0.632671  | 0.0176 |
| 10869487 | RGD1304595 | 0.325422  | 0.7375 | -0.009166 | 0.9897 | -0.122859 | 0.6280 | -0.376347 | 0.0402 |
| 10869499 | Pappa      | 0.285182  | 0.9750 | 0.938935  | 0.0220 | 0.665501  | 0.0819 | 0.848905  | 0.0202 |
| 10869525 | ---        | 0.267490  | 0.9990 | 1.085837  | 0.0831 | 1.056157  | 0.0473 | 1.043696  | 0.0513 |
| 10869530 | Trim32     | 0.024914  | 0.9999 | 0.171906  | 0.3095 | 0.342346  | 0.0035 | 0.166844  | 0.2152 |
| 10869535 | Tlr4       | 0.254944  | 0.8973 | -0.508794 | 0.0332 | -0.523177 | 0.0122 | -0.687504 | 0.0007 |
| 10869659 | Bat2d1     | 0.159909  | 0.9659 | 0.291655  | 0.3002 | 0.461524  | 0.0203 | 0.393188  | 0.0537 |
| 10869770 | Rraga      | 0.049852  | 0.9999 | 0.265651  | 0.2227 | 0.358727  | 0.0284 | 0.354897  | 0.0295 |
| 10869808 | Acer2      | 0.086010  | 0.9990 | -0.292896 | 0.1971 | -0.442456 | 0.0098 | -0.448594 | 0.0078 |
| 10869946 | Tek        | 0.188021  | 0.9921 | -0.477899 | 0.1958 | -0.582794 | 0.0406 | -0.589262 | 0.0379 |
| 10869970 | Fggy       | 0.269692  | 0.9299 | -0.384280 | 0.2702 | -0.628701 | 0.0116 | -0.488476 | 0.0581 |
| 10870043 | Rps18      | -0.072893 | 0.9999 | -0.287121 | 0.4653 | -0.597226 | 0.0137 | -0.527579 | 0.0314 |
| 10870488 | ---        | -0.495134 | 0.1825 | -0.457738 | 0.0095 | -0.330990 | 0.0441 | -0.288813 | 0.0907 |
| 10870490 | Usp24      | 0.137804  | 0.9867 | 0.233622  | 0.4403 | 0.413940  | 0.0328 | 0.199388  | 0.4086 |
| 10870713 | Lrp8       | -0.220239 | 0.9620 | 0.368103  | 0.2600 | 0.670424  | 0.0042 | 0.811857  | 0.0004 |
| 10870739 | RGD1559786 | 0.013571  | 0.9999 | -0.169912 | 0.3640 | -0.365411 | 0.0034 | -0.278629 | 0.0272 |
| 10870777 | Zcchc11    | 0.252972  | 0.9620 | 0.322645  | 0.4575 | 0.593853  | 0.0298 | 0.482741  | 0.0918 |
| 10871041 | Ankrd13c   | -0.197468 | 0.9659 | 0.439632  | 0.1599 | 0.606241  | 0.0126 | 0.693939  | 0.0034 |
| 10871054 | Stil       | 0.000232  | 0.9999 | -0.598335 | 0.0885 | -0.626795 | 0.0332 | -0.940777 | 0.0009 |
| 10871103 | RGD1310351 | -0.054990 | 0.9999 | 0.348074  | 0.0310 | 0.267258  | 0.0676 | 0.560506  | 0.0001 |
| 10871151 | Rad54l     | 0.052420  | 0.9999 | -0.220672 | 0.6224 | -0.262511 | 0.3617 | -0.577796 | 0.0146 |
| 10871229 | Pik3r3     | 0.265414  | 0.9867 | 0.525099  | 0.3232 | 0.778755  | 0.0369 | 0.830276  | 0.0243 |
| 10871250 | Gpbp1l1    | 0.084769  | 0.9999 | 0.286652  | 0.3107 | 0.418707  | 0.0362 | 0.350814  | 0.0932 |
| 10871369 | Eif2b3     | -0.062341 | 0.9999 | 0.351352  | 0.2015 | 0.528289  | 0.0107 | 0.451786  | 0.0307 |
| 10871419 | Tmem53     | 0.024133  | 0.9999 | -0.284454 | 0.3105 | -0.422443 | 0.0328 | -0.331264 | 0.1153 |
| 10871444 | Slc6a9     | -0.122123 | 0.9999 | 0.533684  | 0.1675 | 0.727570  | 0.0151 | 0.775704  | 0.0083 |
| 10871650 | Cited4     | 0.308292  | 0.9630 | -0.589852 | 0.2310 | -0.920079 | 0.0112 | -0.531910 | 0.1937 |
| 10871695 | Ppt1       | 0.295734  | 0.7989 | -0.223987 | 0.4158 | -0.376051 | 0.0365 | -0.387515 | 0.0300 |
| 10871730 | Oxct2a     | 0.014624  | 0.9999 | 0.097334  | 0.5706 | 0.195842  | 0.0460 | -0.001628 | 0.9954 |
| 10871750 | Pabpc4     | 0.093727  | 0.9921 | -0.056463 | 0.8883 | -0.073667 | 0.7469 | -0.312112 | 0.0367 |
| 10871769 | ---        | -0.029079 | 0.9999 | -0.508545 | 0.4567 | -1.164739 | 0.0060 | -1.339503 | 0.0012 |
| 10871771 | ---        | -0.032850 | 0.9999 | -0.308793 | 0.6433 | -0.763089 | 0.0289 | -0.687620 | 0.0532 |
| 10871857 | Mtf1       | 0.001044  | 0.9999 | 0.280988  | 0.3923 | 0.444266  | 0.0422 | 0.286711  | 0.2513 |
| 10871868 | Yrdc       | -0.082397 | 0.9999 | 0.354417  | 0.1584 | 0.414395  | 0.0371 | 0.317570  | 0.1368 |

|          |            |           |        |           |        |           |        |           |        |
|----------|------------|-----------|--------|-----------|--------|-----------|--------|-----------|--------|
| 10871931 | Meaf6      | 0.025093  | 0.9999 | -0.218839 | 0.1861 | -0.462867 | 0.0003 | -0.366118 | 0.0028 |
| 10871975 | Mrps15     | 0.000370  | 0.9999 | -0.148220 | 0.7153 | -0.200557 | 0.4041 | -0.422479 | 0.0312 |
| 10871997 | Rps14      | -0.087293 | 0.9999 | -0.161910 | 0.6795 | -0.417773 | 0.0360 | -0.370323 | 0.0709 |
| 10872003 | Stk40      | -0.205786 | 0.8614 | 0.140649  | 0.6092 | 0.383643  | 0.0096 | 0.353076  | 0.0170 |
| 10872024 | Col8a2     | -0.216887 | 0.9337 | -0.429995 | 0.0834 | -0.505815 | 0.0141 | -0.277468 | 0.2467 |
| 10872032 | Clspn      | -0.072384 | 0.9999 | -0.332461 | 0.2929 | -0.452806 | 0.0474 | -0.576839 | 0.0086 |
| 10872057 | Clspn      | -0.026054 | 0.9999 | -0.244522 | 0.4063 | -0.461926 | 0.0154 | -0.644869 | 0.0005 |
| 10872101 | Sfpq       | 0.040397  | 0.9999 | -0.218653 | 0.4339 | -0.277310 | 0.1476 | -0.400351 | 0.0243 |
| 10872155 | LOC685634  | 0.195074  | 0.9507 | 0.409697  | 0.0751 | 0.355979  | 0.0757 | 0.425968  | 0.0284 |
| 10872326 | Bsdcl      | 0.050302  | 0.9999 | 0.260000  | 0.2654 | 0.279625  | 0.1157 | 0.370383  | 0.0283 |
| 10872336 | Marcks11   | 0.011568  | 0.9999 | -0.235742 | 0.5045 | -0.631247 | 0.0026 | -0.507638 | 0.0150 |
| 10872394 | Col16a1    | -0.008817 | 0.9999 | -0.105504 | 0.8482 | -0.301709 | 0.2150 | -0.438290 | 0.0491 |
| 10872478 | Snrnp40    | 0.013220  | 0.9999 | -0.265138 | 0.3741 | -0.228779 | 0.3316 | -0.488484 | 0.0127 |
| 10872489 | Laptm5     | 0.437688  | 0.9201 | -1.541184 | 0.0002 | -1.617844 | 0.0000 | -1.587898 | 0.0000 |
| 10872585 | Wdte1      | 0.008455  | 0.9999 | 0.266879  | 0.2124 | 0.338732  | 0.0373 | 0.219326  | 0.2355 |
| 10872801 | Stmn1      | 0.118746  | 0.9999 | -0.608350 | 0.2606 | -0.847997 | 0.0316 | -1.397243 | 0.0003 |
| 10872810 | LOC689656  | -0.071051 | 0.9999 | -0.174958 | 0.5468 | -0.380755 | 0.0235 | -0.289926 | 0.1028 |
| 10872885 | ---        | 0.101802  | 0.9819 | 0.031965  | 0.9417 | 0.130881  | 0.4466 | 0.313899  | 0.0208 |
| 10872940 | Fuca1      | 0.081447  | 0.9999 | 0.520974  | 0.0549 | 0.556167  | 0.0166 | 0.763233  | 0.0007 |
| 10873355 | Tmco4      | -0.051196 | 0.9990 | -0.133454 | 0.3917 | -0.278074 | 0.0061 | -0.271804 | 0.0065 |
| 10873419 | Ubr4       | 0.252320  | 0.9303 | 0.488386  | 0.0829 | 0.696435  | 0.0028 | 0.666002  | 0.0034 |
| 10873671 | Fbxo42     | 0.056306  | 0.9998 | 0.188363  | 0.2486 | 0.401339  | 0.0007 | 0.296829  | 0.0113 |
| 10873706 | Epha2      | -0.500017 | 0.9616 | 0.670249  | 0.4106 | 1.082946  | 0.0437 | 0.848873  | 0.1404 |
| 10873732 | Hspb7      | -0.177073 | 0.9582 | 0.279593  | 0.2787 | 0.312360  | 0.1072 | 0.372640  | 0.0480 |
| 10873838 | Dhrs3      | 0.277210  | 0.9025 | -0.834775 | 0.0008 | -0.713258 | 0.0023 | -0.845383 | 0.0003 |
| 10873916 | Rpl35a     | -0.017409 | 0.9999 | -0.091389 | 0.8598 | -0.479821 | 0.0166 | -0.349247 | 0.1014 |
| 10873934 | Mtor       | -0.118427 | 0.9968 | 0.274668  | 0.4058 | 0.446331  | 0.0404 | 0.432777  | 0.0486 |
| 10873993 | ---        | -0.008353 | 0.9999 | -0.127472 | 0.4601 | -0.115795 | 0.3730 | -0.299380 | 0.0041 |
| 10874328 | ---        | 0.009157  | 0.9999 | 0.337236  | 0.2683 | 0.329508  | 0.1659 | 0.657203  | 0.0019 |
| 10874425 | LOC246295  | 0.007843  | 0.9999 | 0.376632  | 0.0116 | 0.466001  | 0.0006 | 0.412785  | 0.0017 |
| 10874458 | Megf6      | 0.318534  | 0.8872 | 0.578314  | 0.0490 | 0.513610  | 0.0463 | -0.034620 | 0.9467 |
| 10874723 | Aurkaip1   | -0.080730 | 0.9919 | -0.108217 | 0.6292 | -0.148585 | 0.2782 | -0.242440 | 0.0450 |
| 10874728 | Mxra8      | 0.144495  | 0.9978 | -0.305709 | 0.5098 | -0.540486 | 0.0557 | -0.646365 | 0.0185 |
| 10874740 | Dvl1       | 0.004365  | 0.9999 | 0.050916  | 0.8917 | 0.310409  | 0.0232 | 0.158738  | 0.3357 |
| 10874847 | RGD1311517 | -0.066861 | 0.9999 | -0.239675 | 0.2422 | -0.322773 | 0.0340 | -0.289557 | 0.0626 |
| 10874940 | Terf1      | 0.028335  | 0.9999 | -0.429857 | 0.2319 | -0.603352 | 0.0243 | -0.690699 | 0.0080 |
| 10875023 | Depdc2     | -0.011471 | 0.9999 | -0.373252 | 0.1044 | -0.436939 | 0.0204 | -0.371878 | 0.0540 |
| 10875183 | Rb1cc1     | 0.212054  | 0.9825 | 0.520808  | 0.1575 | 0.550354  | 0.0625 | 0.625625  | 0.0306 |
| 10875218 | Atp6v1h    | 0.078847  | 0.9998 | 0.168382  | 0.5744 | 0.341395  | 0.0457 | 0.278146  | 0.1246 |
| 10875256 | Tmem68     | -0.067423 | 0.9999 | 0.319140  | 0.2838 | 0.442116  | 0.0403 | 0.399214  | 0.0710 |
| 10875282 | Plag1      | 0.300447  | 0.8614 | 0.385907  | 0.1768 | 0.660746  | 0.0025 | 0.401942  | 0.0817 |
| 10875294 | Sdr16c6    | -0.081352 | 0.9199 | -0.139827 | 0.1162 | -0.166512 | 0.0211 | -0.104507 | 0.1969 |
| 10875322 | Son        | 0.313702  | 0.7668 | 0.349461  | 0.1222 | 0.475735  | 0.0086 | 0.393944  | 0.0314 |
| 10875387 | Asph       | -0.068587 | 0.9999 | -0.217550 | 0.5912 | -0.477745 | 0.0352 | -0.549587 | 0.0129 |
| 10875503 | RGD1559904 | 0.265832  | 0.7989 | 0.251686  | 0.2578 | 0.353017  | 0.0295 | 0.269032  | 0.1200 |
| 10875656 | Ripk2      | -0.452611 | 0.9038 | 0.616204  | 0.2384 | 0.819206  | 0.0353 | 0.852418  | 0.0272 |
| 10875723 | Atp6v0d2   | -0.067369 | 0.9819 | -0.278992 | 0.0040 | -0.267856 | 0.0028 | -0.201154 | 0.0260 |



|          |              |           |        |           |        |           |        |           |        |
|----------|--------------|-----------|--------|-----------|--------|-----------|--------|-----------|--------|
| 10875853 | Pm20d2       | -0.078969 | 0.9972 | -0.146864 | 0.5697 | -0.301039 | 0.0410 | -0.333651 | 0.0210 |
| 10876147 | RGD1309821   | 0.160365  | 0.9653 | -0.226901 | 0.4716 | -0.497311 | 0.0100 | -0.365152 | 0.0706 |
| 10876315 | RGD1310376   | -0.163162 | 0.9959 | -0.487508 | 0.2077 | -0.782741 | 0.0068 | -0.750037 | 0.0086 |
| 10876396 | Gba2         | 0.112634  | 0.9942 | 0.385120  | 0.1004 | 0.458885  | 0.0168 | 0.338726  | 0.0966 |
| 10876769 | Abca1        | 0.168141  | 0.9999 | -1.550097 | 0.0005 | -2.003646 | 0.0000 | -1.909884 | 0.0000 |
| 10876831 | Zfp462       | -0.036226 | 0.9999 | 0.412665  | 0.0800 | 0.210000  | 0.3801 | 0.688235  | 0.0004 |
| 10876838 | Klf4         | 0.161760  | 0.9852 | -0.556674 | 0.0274 | -0.298399 | 0.2372 | -0.463622 | 0.0414 |
| 10876859 | Ikbkap       | 0.105685  | 0.9852 | 0.060349  | 0.8762 | 0.320865  | 0.0290 | -0.022647 | 0.9384 |
| 10876915 | RGD1308958   | 0.234556  | 0.8614 | 0.156007  | 0.6245 | 0.458369  | 0.0064 | 0.212844  | 0.2876 |
| 10877069 | Lpar1        | 0.278624  | 0.9201 | -0.425659 | 0.1901 | -0.609581 | 0.0133 | -0.737243 | 0.0021 |
| 10877078 | RGD1306148   | 0.103636  | 0.9626 | 0.071739  | 0.8022 | 0.273331  | 0.0248 | 0.065501  | 0.7331 |
| 10877482 | Akna         | -0.072809 | 0.9990 | -0.351601 | 0.0388 | -0.377795 | 0.0104 | -0.355367 | 0.0155 |
| 10877532 | Tnfsf15      | -0.091679 | 0.9921 | -0.220719 | 0.3013 | -0.400958 | 0.0073 | -0.286888 | 0.0656 |
| 10877581 | LOC100362998 | -0.082281 | 0.9921 | -0.140221 | 0.5062 | -0.296768 | 0.0185 | -0.190335 | 0.1731 |
| 10877644 | Tle1         | -0.041783 | 0.9999 | 0.396664  | 0.0556 | 0.608104  | 0.0006 | 0.360796  | 0.0462 |
| 10877785 | Ttc39b       | -0.000427 | 0.9999 | -0.468833 | 0.0275 | -0.546165 | 0.0035 | -0.645364 | 0.0005 |
| 10877880 | Bnc2         | 0.149419  | 0.9277 | 0.341044  | 0.0275 | 0.063035  | 0.7722 | 0.212098  | 0.1608 |
| 10877907 | Adfp         | 0.117032  | 0.9999 | -0.486531 | 0.1909 | -0.433245 | 0.1582 | -0.674774 | 0.0164 |
| 10877916 | Rps6         | -0.027087 | 0.9999 | -0.178390 | 0.3304 | -0.235270 | 0.0713 | -0.299947 | 0.0167 |
| 10877943 | Ptplad2      | 0.243539  | 0.9593 | -0.852067 | 0.0017 | -1.228924 | 0.0000 | -1.174245 | 0.0000 |
| 10877960 | Ifna1        | -0.009708 | 0.9999 | 0.097425  | 0.3627 | 0.029498  | 0.8011 | 0.150200  | 0.0395 |
| 10877997 | Cdkn2a       | -0.272465 | 0.9133 | -0.359328 | 0.2772 | -0.635976 | 0.0067 | -0.590323 | 0.0112 |
| 10878001 | Cdkn2b       | -0.525955 | 0.7200 | -0.033272 | 0.9722 | -0.586905 | 0.0206 | -0.543852 | 0.0327 |
| 10878032 | Cks1b        | -0.130319 | 0.9998 | -0.431812 | 0.2600 | -0.329104 | 0.3109 | -0.729824 | 0.0070 |
| 10878286 | Jak1         | 0.236437  | 0.9199 | -0.319253 | 0.2724 | -0.145325 | 0.6163 | -0.468346 | 0.0249 |
| 10878428 | Rpl32        | 0.004150  | 0.9999 | -0.117750 | 0.7011 | -0.298980 | 0.0520 | -0.310193 | 0.0428 |
| 10878635 | Gpx7         | -0.001587 | 0.9999 | -0.416801 | 0.2052 | -0.693346 | 0.0049 | -0.658447 | 0.0067 |
| 10878653 | Zfyve9       | 0.183756  | 0.8945 | 0.348415  | 0.0428 | 0.377053  | 0.0110 | 0.272902  | 0.0804 |
| 10878705 | Cdkn2c       | 0.208667  | 0.9968 | -0.778086 | 0.0899 | -0.974118 | 0.0099 | -1.056386 | 0.0041 |
| 10878910 | Rps26        | -0.048870 | 0.9999 | -0.180950 | 0.2030 | -0.151030 | 0.2061 | -0.229687 | 0.0338 |
| 10878936 | ---          | -0.032850 | 0.9999 | -0.419192 | 0.0345 | -0.469598 | 0.0065 | -0.496939 | 0.0032 |
| 10878969 | Kif2c        | 0.086827  | 0.9999 | -1.003243 | 0.0958 | -1.094332 | 0.0286 | -1.597449 | 0.0009 |
| 10879039 | B4galt2      | 0.021066  | 0.9999 | -0.200348 | 0.6749 | -0.454338 | 0.0675 | -0.509700 | 0.0367 |
| 10879063 | Ipo13        | 0.010252  | 0.9999 | 0.269233  | 0.1874 | 0.366156  | 0.0192 | 0.436223  | 0.0040 |
| 10879227 | RGD1308616   | 0.197849  | 0.9199 | 0.407017  | 0.0446 | 0.451053  | 0.0096 | 0.483129  | 0.0046 |
| 10879242 | RGD1308616   | 0.257198  | 0.9310 | 0.510170  | 0.0800 | 0.557042  | 0.0229 | 0.651107  | 0.0061 |
| 10879244 | RGD1308616   | -0.005621 | 0.9999 | 0.288543  | 0.2721 | 0.455633  | 0.0153 | 0.206466  | 0.3740 |
| 10879246 | RGD1308616   | 0.188033  | 0.9624 | 0.393724  | 0.1589 | 0.512765  | 0.0192 | 0.433346  | 0.0536 |
| 10879250 | RGD1308616   | 0.122024  | 0.9852 | 0.392970  | 0.0428 | 0.416960  | 0.0125 | 0.476489  | 0.0034 |
| 10879257 | Cdc20        | 0.017568  | 0.9999 | -1.166309 | 0.0143 | -1.296916 | 0.0025 | -1.564941 | 0.0002 |
| 10879464 | LOC680700    | -0.035606 | 0.9999 | -0.205688 | 0.4668 | -0.432867 | 0.0127 | -0.569618 | 0.0008 |
| 10879516 | Mfsd2        | -0.250187 | 0.8614 | 0.354268  | 0.1273 | 0.370067  | 0.0524 | 0.384215  | 0.0429 |
| 10879555 | Macf1        | 0.260643  | 0.8945 | 0.205353  | 0.5883 | 0.463052  | 0.0290 | 0.320646  | 0.1684 |
| 10879660 | LOC100361083 | 0.083749  | 0.9999 | -0.486194 | 0.0403 | -0.039148 | 0.9206 | -0.572963 | 0.0042 |
| 10879704 | Cdca8        | -0.072415 | 0.9999 | -0.619674 | 0.0743 | -0.847129 | 0.0035 | -0.973176 | 0.0006 |
| 10879797 | Eif2c3       | 0.010796  | 0.9999 | 0.217032  | 0.3608 | 0.596641  | 0.0002 | 0.345652  | 0.0317 |
| 10880095 | Serinc2      | -0.250797 | 0.9867 | 0.548538  | 0.2544 | 0.630331  | 0.0833 | 0.881890  | 0.0102 |

|          |            |           |        |           |        |           |        |           |        |
|----------|------------|-----------|--------|-----------|--------|-----------|--------|-----------|--------|
| 10880204 | Epb4.1     | 0.359809  | 0.8437 | 0.289984  | 0.4454 | 0.482099  | 0.0487 | 0.353526  | 0.1880 |
| 10880251 | Gpn2       | 0.204796  | 0.8614 | 0.245963  | 0.2289 | 0.502974  | 0.0008 | 0.350404  | 0.0199 |
| 10880293 | Map3k6     | -0.106183 | 0.9977 | -0.122866 | 0.7889 | -0.054054 | 0.8792 | -0.406393 | 0.0444 |
| 10880343 | Fgr        | 0.059732  | 0.9999 | -0.408784 | 0.0435 | -0.406280 | 0.0209 | -0.270339 | 0.1618 |
| 10880404 | Ptafr      | 0.099884  | 0.9990 | -0.472598 | 0.0359 | -0.566096 | 0.0038 | -0.590568 | 0.0020 |
| 10880408 | Hmgn2      | 0.117353  | 0.9999 | -0.819958 | 0.0222 | -1.099295 | 0.0006 | -1.387773 | 0.0000 |
| 10880436 | Sh3bgrl3   | -0.104140 | 0.9999 | -0.509310 | 0.1433 | -0.754932 | 0.0056 | -0.740958 | 0.0057 |
| 10880526 | ---        | 0.074648  | 0.9999 | -0.273432 | 0.5574 | -0.598024 | 0.0248 | -0.338030 | 0.2777 |
| 10880727 | C1qb       | 0.138018  | 0.9972 | -0.557192 | 0.0646 | -0.734581 | 0.0038 | -0.741642 | 0.0028 |
| 10880731 | C1qc       | 0.185819  | 0.9998 | -0.767595 | 0.1126 | -0.964884 | 0.0133 | -1.012484 | 0.0084 |
| 10880734 | C1qa       | 0.229466  | 0.9871 | -1.250655 | 0.0003 | -1.695558 | 0.0000 | -1.654625 | 0.0000 |
| 10880872 | Pla2g5     | 0.068643  | 0.9999 | -0.911348 | 0.0131 | -1.182179 | 0.0004 | -0.809098 | 0.0141 |
| 10880897 | RGD1560187 | -0.086010 | 0.9950 | -0.206540 | 0.3541 | -0.331207 | 0.0295 | -0.290053 | 0.0631 |
| 10881047 | Necap2     | 0.027804  | 0.9999 | -0.327339 | 0.1572 | -0.332287 | 0.0757 | -0.479507 | 0.0065 |
| 10881109 | ---        | 0.256648  | 0.8744 | 0.462552  | 0.0443 | 0.743190  | 0.0002 | 0.455925  | 0.0214 |
| 10881146 | ---        | 0.240578  | 0.8913 | 0.399599  | 0.0821 | 0.475416  | 0.0126 | 0.554202  | 0.0028 |
| 10881178 | Dnajc16    | -0.003664 | 0.9999 | 0.239511  | 0.4969 | 0.355612  | 0.1118 | 0.430276  | 0.0469 |
| 10881211 | Efh2       | -0.338713 | 0.8762 | 0.362047  | 0.3487 | 0.518371  | 0.0541 | 0.689049  | 0.0074 |
| 10881216 | Fhad1      | -0.166002 | 0.8437 | 0.384370  | 0.0009 | 0.394511  | 0.0003 | 0.330252  | 0.0019 |
| 10881253 | Tmem51     | 0.045895  | 0.9999 | 0.372582  | 0.4782 | 0.599936  | 0.0697 | 0.686166  | 0.0339 |
| 10881293 | Pdpn       | 0.066348  | 0.9999 | -0.459086 | 0.0696 | -0.477581 | 0.0264 | -0.483576 | 0.0233 |
| 10881353 | Vps13d     | 0.144700  | 0.9921 | 0.541722  | 0.0313 | 0.636989  | 0.0037 | 0.616243  | 0.0041 |
| 10881486 | Miip       | -0.013120 | 0.9999 | -0.324591 | 0.0202 | -0.365247 | 0.0034 | -0.445300 | 0.0003 |
| 10881542 | Clcn6      | -0.027376 | 0.9999 | 0.149181  | 0.6850 | 0.397702  | 0.0319 | 0.262500  | 0.2063 |
| 10881590 | Fbxo44     | -0.054498 | 0.9999 | 0.274441  | 0.2452 | 0.315807  | 0.0788 | 0.495628  | 0.0031 |
| 10881648 | Pex14      | 0.154977  | 0.9010 | 0.130282  | 0.5750 | 0.212531  | 0.1233 | 0.270318  | 0.0406 |
| 10881685 | Kif1b      | 0.307757  | 0.8614 | 0.303038  | 0.3627 | 0.507760  | 0.0241 | 0.271265  | 0.3095 |
| 10881824 | H6pd       | 0.052923  | 0.9999 | -0.254785 | 0.4303 | -0.463306 | 0.0255 | -0.380705 | 0.0771 |
| 10881885 | Vamp3      | 0.054046  | 0.9951 | -0.288243 | 0.0052 | -0.332330 | 0.0005 | -0.226029 | 0.0173 |
| 10882155 | Atp5h      | -0.075390 | 0.9921 | -0.138090 | 0.5035 | -0.248927 | 0.0475 | -0.161833 | 0.2597 |
| 10882168 | Mmp23      | 0.083797  | 0.9999 | -0.310328 | 0.4430 | -0.554950 | 0.0318 | -0.718386 | 0.0038 |
| 10882178 | ---        | -0.000463 | 0.9999 | 0.363506  | 0.1355 | 0.489854  | 0.0111 | 0.273056  | 0.2158 |
| 10882356 | RGD1310271 | 0.194958  | 0.9277 | 0.307365  | 0.1909 | 0.308686  | 0.1003 | 0.435480  | 0.0139 |
| 10882391 | Nbl1       | 0.241547  | 0.8997 | -0.117077 | 0.8059 | -0.276207 | 0.2187 | -0.478859 | 0.0160 |
| 10882439 | Ccdc75     | 0.119166  | 0.9999 | 0.503656  | 0.1231 | 0.571326  | 0.0313 | 0.450293  | 0.1088 |
| 10882494 | ---        | -0.145194 | 0.7200 | -0.163249 | 0.0588 | -0.150031 | 0.0454 | -0.128741 | 0.1001 |
| 10882525 | Tmem178    | 0.302949  | 0.8614 | -0.355848 | 0.2354 | -0.478106 | 0.0325 | -0.532980 | 0.0150 |
| 10882534 | Sgk493     | -0.192476 | 0.9653 | -0.246132 | 0.5460 | -0.462543 | 0.0544 | -0.505947 | 0.0324 |
| 10882571 | Mta3       | 0.184440  | 0.8614 | 0.294199  | 0.0593 | 0.233430  | 0.0936 | 0.394089  | 0.0022 |
| 10882590 | ---        | -0.118236 | 0.9620 | 0.085516  | 0.7733 | 0.073326  | 0.7058 | 0.285069  | 0.0302 |
| 10882594 | Plekhh2    | -0.057923 | 0.9999 | 0.550998  | 0.0248 | 0.440029  | 0.0487 | 0.592111  | 0.0055 |
| 10882659 | Ppm1b      | -0.038683 | 0.9999 | 0.421211  | 0.0683 | 0.612015  | 0.0016 | 0.528442  | 0.0055 |
| 10882773 | Socs5      | -0.044771 | 0.9999 | -0.415985 | 0.0079 | -0.213786 | 0.1731 | -0.401683 | 0.0041 |
| 10882777 | Ttc7       | 0.050773  | 0.9999 | -0.377875 | 0.0418 | -0.385640 | 0.0166 | -0.552417 | 0.0005 |
| 10883076 | Rbks       | -0.090805 | 0.9972 | -0.228029 | 0.3592 | -0.391661 | 0.0198 | -0.280998 | 0.1192 |
| 10883098 | Znf513     | 0.061497  | 0.9999 | 0.112177  | 0.7046 | 0.314256  | 0.0310 | 0.058056  | 0.8101 |
| 10883162 | Slc30a3    | 0.040784  | 0.9999 | 0.654491  | 0.0385 | 0.481893  | 0.0946 | 0.855185  | 0.0014 |

|          |            |           |        |           |        |           |        |           |        |
|----------|------------|-----------|--------|-----------|--------|-----------|--------|-----------|--------|
| 10883200 | Preb       | -0.058817 | 0.9999 | 0.397147  | 0.0463 | 0.400199  | 0.0204 | 0.399079  | 0.0198 |
| 10883321 | Asxl2      | 0.152032  | 0.9867 | 0.274421  | 0.4042 | 0.443424  | 0.0412 | 0.322356  | 0.1757 |
| 10883420 | RGD1561792 | 0.132469  | 0.9921 | -0.159583 | 0.6854 | -0.337348 | 0.1015 | -0.425558 | 0.0314 |
| 10883510 | Pum2       | 0.084379  | 0.9999 | 0.217802  | 0.5315 | 0.482514  | 0.0177 | 0.153978  | 0.5907 |
| 10883557 | Wdr35l     | 0.044324  | 0.9999 | 0.526397  | 0.0669 | 0.527165  | 0.0319 | 0.594883  | 0.0132 |
| 10883649 | ---        | -0.198507 | 0.7312 | -0.254329 | 0.0362 | -0.183872 | 0.0982 | 0.052229  | 0.7615 |
| 10883785 | Odc1       | -0.154528 | 0.9247 | -0.189523 | 0.3649 | -0.122759 | 0.5026 | -0.297973 | 0.0359 |
| 10883903 | Rrm2       | -0.041968 | 0.9999 | -1.121286 | 0.0873 | -1.094485 | 0.0487 | -2.006832 | 0.0002 |
| 10884158 | ---        | -0.235376 | 0.9593 | 0.422975  | 0.1953 | 0.529824  | 0.0346 | 0.562845  | 0.0229 |
| 10884174 | Sypl1      | -0.051295 | 0.9999 | 0.116277  | 0.6772 | 0.216662  | 0.1531 | 0.369278  | 0.0072 |
| 10884215 | Twist1     | -0.227632 | 0.9624 | -0.540165 | 0.0762 | -0.491028 | 0.0613 | -0.635401 | 0.0115 |
| 10884220 | Snx13      | 0.009775  | 0.9999 | 0.441814  | 0.0904 | 0.462914  | 0.0340 | 0.433175  | 0.0499 |
| 10884278 | Ispd       | 0.161061  | 0.9734 | -0.285905 | 0.3462 | -0.422147 | 0.0448 | -0.448894 | 0.0310 |
| 10884831 | Fam179b    | 0.210723  | 0.9619 | 0.277988  | 0.4243 | 0.525852  | 0.0184 | 0.294589  | 0.2555 |
| 10885119 | Daam1      | 0.150981  | 0.9921 | 0.527815  | 0.0451 | 0.305094  | 0.2355 | 0.288014  | 0.2837 |
| 10885145 | Ikamp      | -0.026421 | 0.9999 | 0.307616  | 0.0934 | 0.308821  | 0.0446 | 0.422532  | 0.0040 |
| 10885193 | Ppm1a      | -0.022079 | 0.9999 | 0.224917  | 0.1756 | 0.392940  | 0.0020 | 0.386295  | 0.0018 |
| 10885205 | Rpl35a     | -0.018122 | 0.9999 | -0.096046 | 0.8559 | -0.475726 | 0.0217 | -0.377134 | 0.0810 |
| 10885217 | Slc38a6    | 0.239802  | 0.9750 | 0.405544  | 0.3869 | 0.644627  | 0.0398 | 0.625206  | 0.0476 |
| 10885299 | Rhoj       | -0.040175 | 0.9999 | -0.389615 | 0.3721 | -0.718265 | 0.0132 | -0.702091 | 0.0150 |
| 10885393 | Akap5      | 0.044035  | 0.9999 | 0.791022  | 0.0142 | 0.974728  | 0.0008 | 0.893236  | 0.0016 |
| 10885400 | Hspa2      | -0.185284 | 0.9921 | 0.692303  | 0.0435 | 0.751717  | 0.0110 | 0.785720  | 0.0067 |
| 10885404 | RGD1309051 | -0.129474 | 0.9921 | 0.661181  | 0.0022 | 0.839119  | 0.0000 | 0.731607  | 0.0003 |
| 10885417 | Plekhg3    | -0.009498 | 0.9999 | 0.365612  | 0.2360 | 0.537975  | 0.0183 | 0.411710  | 0.0856 |
| 10885441 | Churc1     | 0.060721  | 0.9999 | -0.146433 | 0.7830 | -0.476840 | 0.0417 | -0.327385 | 0.2112 |
| 10885500 | Mpp5       | 0.144286  | 0.9981 | 0.326868  | 0.4618 | 0.607837  | 0.0291 | 0.364463  | 0.2564 |
| 10885578 | Rad51ll    | -0.051748 | 0.9999 | -0.387793 | 0.0492 | -0.424957 | 0.0119 | -0.558515 | 0.0007 |
| 10885628 | Galnt1l    | -0.039508 | 0.9999 | -0.120937 | 0.8232 | -0.558461 | 0.0113 | -0.561437 | 0.0099 |
| 10885680 | Smoc1      | 0.140525  | 0.9990 | 0.536004  | 0.1155 | 0.142017  | 0.7352 | 0.605747  | 0.0286 |
| 10885970 | Ylpm1      | 0.216505  | 0.8997 | 0.300478  | 0.2065 | 0.459034  | 0.0101 | 0.351799  | 0.0566 |
| 10885998 | Dlst       | -0.145396 | 0.8770 | -0.269580 | 0.0373 | -0.250599 | 0.0279 | -0.333483 | 0.0023 |
| 10886036 | Jdp2       | 0.033724  | 0.9999 | -0.394119 | 0.1171 | -0.528935 | 0.0088 | -0.693326 | 0.0005 |
| 10886185 | LOC688717  | -0.004864 | 0.9999 | -0.126799 | 0.8338 | -0.521468 | 0.0350 | -0.370930 | 0.1714 |
| 10886298 | Zc3h14     | 0.097316  | 0.9921 | 0.149490  | 0.5770 | 0.352193  | 0.0191 | 0.294222  | 0.0566 |
| 10886631 | Glrx5      | -0.004073 | 0.9999 | 0.202667  | 0.6475 | 0.515787  | 0.0260 | 0.761190  | 0.0007 |
| 10886693 | Vrk1       | -0.129753 | 0.9921 | -0.413726 | 0.1032 | -0.427804 | 0.0424 | -0.624750 | 0.0019 |
| 10886728 | Hhip1l     | 0.125612  | 0.9999 | 1.238223  | 0.0004 | 1.254813  | 0.0002 | 0.896533  | 0.0054 |
| 10886850 | ---        | 0.090729  | 0.9999 | 0.292736  | 0.7527 | 0.854686  | 0.0472 | 0.082410  | 0.9207 |
| 10886868 | ---        | 0.066410  | 0.9999 | 0.083742  | 0.9309 | 0.652733  | 0.0453 | 0.047130  | 0.9422 |
| 10887141 | ---        | 0.117190  | 0.9544 | 0.309979  | 0.0202 | 0.246201  | 0.0436 | 0.135080  | 0.3578 |
| 10887144 | Dync1h1    | 0.239316  | 0.9277 | 0.349282  | 0.2488 | 0.555564  | 0.0115 | 0.503868  | 0.0222 |
| 10887306 | Tnfaip2    | -0.101778 | 0.9999 | -1.014008 | 0.0006 | -0.987275 | 0.0004 | -1.090169 | 0.0001 |
| 10887338 | Mark3      | 0.237894  | 0.8437 | 0.296797  | 0.1282 | 0.475363  | 0.0022 | 0.406438  | 0.0080 |
| 10887506 | Siva1      | -0.029312 | 0.9999 | -0.468876 | 0.0685 | -0.433284 | 0.0513 | -0.776351 | 0.0003 |
| 10887516 | LOC500726  | 0.012935  | 0.9999 | 0.291524  | 0.2894 | 0.528716  | 0.0064 | 0.425203  | 0.0306 |
| 10887538 | Pld4       | 0.060753  | 0.9999 | -0.228093 | 0.3459 | -0.437533 | 0.0074 | -0.257495 | 0.1541 |
| 10887627 | LOC690422  | -0.126986 | 0.9674 | -0.515369 | 0.0024 | -0.512077 | 0.0012 | -0.571316 | 0.0003 |

|          |            |           |        |           |        |           |        |           |        |
|----------|------------|-----------|--------|-----------|--------|-----------|--------|-----------|--------|
| 10887719 | Ncapg2     | 0.008681  | 0.9999 | -0.525515 | 0.0543 | -0.468124 | 0.0502 | -0.931621 | 0.0001 |
| 10887842 | Strn       | 0.095790  | 0.9999 | 0.412474  | 0.1429 | 0.521123  | 0.0195 | 0.470605  | 0.0364 |
| 10887861 | Heatr5b    | 0.123832  | 0.9653 | 0.264061  | 0.1785 | 0.482311  | 0.0013 | 0.350130  | 0.0198 |
| 10887947 | Cyp1b1     | 0.194604  | 0.9950 | -0.542876 | 0.2488 | -0.474584 | 0.2168 | -0.690795 | 0.0493 |
| 10887990 | Dhx57      | 0.108216  | 0.9921 | 0.214398  | 0.4475 | 0.439016  | 0.0130 | 0.341386  | 0.0633 |
| 10888021 | Sos1       | 0.215258  | 0.9544 | 0.373760  | 0.1989 | 0.612060  | 0.0051 | 0.530885  | 0.0150 |
| 10888056 | Map4k3     | -0.006923 | 0.9999 | -0.480314 | 0.0112 | -0.577605 | 0.0008 | -0.654244 | 0.0001 |
| 10888125 | H3f3b      | 0.011277  | 0.9999 | -0.293477 | 0.2951 | -0.370817 | 0.0700 | -0.424537 | 0.0339 |
| 10888150 | Zfp3612    | 0.049732  | 0.9999 | -0.414551 | 0.0646 | -0.716141 | 0.0002 | -0.629665 | 0.0007 |
| 10888153 | Thada      | -0.086704 | 0.9999 | 0.390907  | 0.1424 | 0.550003  | 0.0087 | 0.476339  | 0.0237 |
| 10888460 | Birc6      | 0.151122  | 0.9624 | 0.215930  | 0.4265 | 0.322820  | 0.0716 | 0.349538  | 0.0489 |
| 10888602 | Lclat1     | 0.025828  | 0.9999 | 0.284440  | 0.5094 | 0.223650  | 0.5038 | 0.574984  | 0.0253 |
| 10888612 | Ypel5      | 0.202197  | 0.8872 | 0.287387  | 0.1589 | 0.316589  | 0.0523 | 0.430435  | 0.0056 |
| 10888684 | Spdya      | -0.081869 | 0.9998 | 0.257670  | 0.2747 | 0.340680  | 0.0481 | 0.316160  | 0.0728 |
| 10888692 | Ppp1cb     | -0.066550 | 0.9972 | 0.205547  | 0.2079 | 0.340410  | 0.0053 | 0.387237  | 0.0012 |
| 10888852 | Trim54     | -0.110933 | 0.9977 | 0.413413  | 0.1057 | 0.469349  | 0.0253 | 0.493052  | 0.0172 |
| 10888931 | Abhd1      | -0.036571 | 0.9999 | 0.471466  | 0.0187 | 0.748547  | 0.0000 | 0.701452  | 0.0001 |
| 10889022 | Cenpa      | -0.112876 | 0.9999 | -0.801628 | 0.0073 | -0.976476 | 0.0004 | -0.972827 | 0.0003 |
| 10889156 | Klhl29     | -0.097127 | 0.9867 | -0.319137 | 0.0455 | -0.353078 | 0.0101 | -0.493690 | 0.0003 |
| 10889199 | Gen1       | -0.110964 | 0.9999 | -0.447814 | 0.1443 | -0.623478 | 0.0097 | -0.640400 | 0.0068 |
| 10889213 | Vsnl1      | 0.077964  | 0.9999 | -0.415665 | 0.0491 | -0.465561 | 0.0101 | -0.347996 | 0.0645 |
| 10889269 | Lpin1      | 0.486016  | 0.8357 | 0.539270  | 0.1958 | 0.795114  | 0.0115 | 0.686783  | 0.0309 |
| 10889379 | Id2        | 0.502795  | 0.7200 | -0.871991 | 0.0017 | -0.490714 | 0.0684 | -0.376013 | 0.2026 |
| 10889388 | Rnf144a    | 0.092406  | 0.9999 | -0.520513 | 0.0367 | -0.637572 | 0.0032 | -0.729935 | 0.0006 |
| 10889419 | ---        | -0.121195 | 0.8539 | -0.200200 | 0.0308 | -0.126915 | 0.1488 | -0.142289 | 0.1010 |
| 10889475 | Pxdn       | 0.044066  | 0.9999 | 0.778860  | 0.0143 | 0.486408  | 0.1095 | -0.029267 | 0.9631 |
| 10889607 | Pik3cg     | -0.065148 | 0.9999 | -0.417073 | 0.0059 | -0.422339 | 0.0024 | -0.377750 | 0.0058 |
| 10889660 | Ahr        | -0.270358 | 0.9620 | -0.491837 | 0.2041 | -0.518032 | 0.0903 | -0.765152 | 0.0075 |
| 10889723 | Smorce11   | -0.209578 | 0.7312 | -0.297109 | 0.0169 | -0.116298 | 0.4016 | -0.139377 | 0.2968 |
| 10889728 | Arl4a      | -0.304641 | 0.9544 | 0.715358  | 0.0486 | 1.117577  | 0.0003 | 0.595815  | 0.0654 |
| 10889766 | Dnajb9     | 0.229350  | 0.9114 | 0.430257  | 0.0666 | 0.383275  | 0.0600 | 0.403556  | 0.0466 |
| 10889810 | ---        | -0.235016 | 0.7722 | -0.106597 | 0.7053 | -0.279884 | 0.0451 | -0.306991 | 0.0255 |
| 10889812 | Strn3      | -0.021014 | 0.9999 | 0.263381  | 0.4431 | 0.613561  | 0.0044 | 0.434000  | 0.0516 |
| 10889833 | Hectd1     | 0.206226  | 0.8774 | 0.140208  | 0.6518 | 0.345316  | 0.0337 | 0.302031  | 0.0711 |
| 10889913 | RGD1309138 | -0.041091 | 0.9999 | -0.353103 | 0.2344 | -0.499436 | 0.0237 | -0.469621 | 0.0338 |
| 10890031 | Garnl1     | 0.164761  | 0.9589 | 0.445698  | 0.0204 | 0.482835  | 0.0049 | 0.454225  | 0.0073 |
| 10890156 | Fbxo33     | 0.044258  | 0.9999 | 0.261675  | 0.3605 | 0.543829  | 0.0044 | 0.305315  | 0.1476 |
| 10890238 | Rps29      | -0.039000 | 0.9999 | -0.120667 | 0.4460 | -0.203740 | 0.0448 | -0.183640 | 0.0786 |
| 10890252 | Pole2      | -0.187527 | 0.9921 | -0.366696 | 0.4538 | -0.606303 | 0.0537 | -0.861256 | 0.0039 |
| 10890299 | Rpl10a     | 0.016673  | 0.9999 | -0.211537 | 0.2297 | -0.486130 | 0.0002 | -0.535214 | 0.0000 |
| 10890314 | Sos2       | 0.162148  | 0.9921 | 0.373421  | 0.2616 | 0.674839  | 0.0046 | 0.408776  | 0.1118 |
| 10890365 | Map4k5     | 0.126789  | 0.9921 | 0.307972  | 0.2812 | 0.456402  | 0.0263 | 0.235376  | 0.3426 |
| 10890441 | Pygl       | 0.170233  | 0.9624 | -0.356262 | 0.1433 | -0.414324 | 0.0331 | -0.414654 | 0.0323 |
| 10890759 | Atp6v1d    | -0.089544 | 0.9999 | 0.181196  | 0.7733 | 0.567726  | 0.0440 | 0.472638  | 0.1114 |
| 10890886 | Zfp3611    | 0.296588  | 0.8713 | -0.549875 | 0.0354 | -0.635735 | 0.0050 | -0.289119 | 0.2837 |
| 10890891 | Dcaf5      | -0.063563 | 0.9999 | 0.193597  | 0.6647 | 0.519460  | 0.0238 | 0.323125  | 0.2137 |
| 10891039 | Numb       | -0.102209 | 0.9950 | 0.342324  | 0.1291 | 0.455467  | 0.0113 | 0.407642  | 0.0240 |

|          |            |           |        |           |        |           |        |           |        |
|----------|------------|-----------|--------|-----------|--------|-----------|--------|-----------|--------|
| 10891203 | RGD1307597 | 0.026599  | 0.9999 | 0.294889  | 0.0409 | 0.243408  | 0.0578 | 0.354593  | 0.0035 |
| 10891271 | Nek9       | 0.068248  | 0.9999 | 0.135290  | 0.6418 | 0.392200  | 0.0091 | 0.222267  | 0.1902 |
| 10891502 | Galc       | 0.275547  | 0.7312 | -0.370411 | 0.0245 | -0.273987 | 0.0708 | -0.483912 | 0.0007 |
| 10891530 | Ptpn21     | 0.029412  | 0.9999 | 0.346684  | 0.1935 | 0.483026  | 0.0171 | 0.412769  | 0.0459 |
| 10891548 | Eml5       | -0.006871 | 0.9999 | 0.131164  | 0.4870 | 0.088715  | 0.5651 | 0.286043  | 0.0110 |
| 10891561 | Eml5       | 0.017372  | 0.9999 | 0.177337  | 0.2130 | 0.257525  | 0.0157 | 0.334038  | 0.0012 |
| 10891719 | Smek1      | 0.181224  | 0.9867 | 0.253636  | 0.5789 | 0.701437  | 0.0056 | 0.322235  | 0.2842 |
| 10891818 | Atxn3      | -0.083925 | 0.9999 | 0.207372  | 0.5144 | 0.469515  | 0.0125 | 0.289089  | 0.1670 |
| 10891880 | Prima1     | -0.048287 | 0.9999 | 0.716134  | 0.0001 | 0.551604  | 0.0013 | 0.786439  | 0.0000 |
| 10891910 | Ifi2712b   | 0.246499  | 0.9333 | -0.455394 | 0.1173 | -0.706411 | 0.0025 | -0.741121 | 0.0011 |
| 10892050 | RGD1304563 | -0.041081 | 0.9999 | -0.642644 | 0.0006 | -0.431050 | 0.0144 | -0.683323 | 0.0001 |
| 10892074 | RGD1304878 | 0.109049  | 0.9942 | 0.496902  | 0.0175 | 0.756989  | 0.0001 | 0.567000  | 0.0020 |
| 10892097 | RGD1304878 | 0.049816  | 0.9999 | 0.390398  | 0.3329 | 0.771140  | 0.0050 | 0.366515  | 0.2555 |
| 10892197 | Rage       | 0.026279  | 0.9999 | 0.147428  | 0.4379 | 0.318814  | 0.0079 | 0.236694  | 0.0568 |
| 10892265 | Ckb        | 0.047754  | 0.9999 | -0.576025 | 0.0502 | -0.750746 | 0.0028 | -0.687607 | 0.0054 |
| 10892309 | RGD1310269 | 0.309622  | 0.9885 | -0.823352 | 0.1471 | -1.069039 | 0.0168 | -1.163216 | 0.0079 |
| 10892332 | ---        | 0.070285  | 0.9999 | -0.471368 | 0.0233 | -0.205063 | 0.3583 | -0.370805 | 0.0518 |
| 10892515 | ---        | -0.317450 | 0.7375 | -0.310700 | 0.1744 | -0.318521 | 0.0832 | -0.376543 | 0.0343 |
| 10892616 | ---        | -0.028876 | 0.9999 | -0.012534 | 0.9761 | 0.069656  | 0.6494 | 0.219389  | 0.0458 |
| 10892702 | Rpl32      | -0.011880 | 0.9999 | -0.119860 | 0.6976 | -0.289290 | 0.0635 | -0.323303 | 0.0346 |
| 10892980 | Baz2a      | 0.188243  | 0.9624 | 0.362439  | 0.1977 | 0.480292  | 0.0252 | 0.447859  | 0.0380 |
| 10893035 | Timeless   | -0.057247 | 0.9999 | -0.177891 | 0.6474 | -0.273295 | 0.2287 | -0.431344 | 0.0341 |
| 10893064 | Apof       | -0.100941 | 0.9136 | -0.160398 | 0.1567 | -0.177992 | 0.0482 | -0.117404 | 0.2528 |
| 10893327 | Usp12      | 0.040286  | 0.9999 | 0.290220  | 0.3095 | 0.428081  | 0.0340 | 0.270309  | 0.2402 |
| 10893355 | Olr964     | -0.192460 | 0.5767 | -0.260805 | 0.0047 | -0.185014 | 0.0328 | -0.183481 | 0.0339 |
| 10893361 | Npm1       | -0.003763 | 0.9999 | -0.176330 | 0.3345 | -0.146623 | 0.3215 | -0.271003 | 0.0320 |
| 10893402 | ---        | 0.257265  | 0.4739 | 0.164327  | 0.2947 | 0.265678  | 0.0166 | 0.122063  | 0.3718 |
| 10893412 | Olr1063    | -0.211555 | 0.7312 | -0.111587 | 0.5864 | -0.151854 | 0.2369 | -0.238123 | 0.0388 |
| 10893482 | S1pr4      | 0.075529  | 0.9921 | 0.250970  | 0.0577 | 0.257509  | 0.0235 | 0.183107  | 0.1361 |
| 10893528 | Fzr1       | -0.022061 | 0.9999 | -0.294830 | 0.1751 | -0.290034 | 0.0986 | -0.394029 | 0.0179 |
| 10893586 | Mrpl54     | -0.184365 | 0.8614 | -0.277237 | 0.0899 | -0.483275 | 0.0004 | -0.423196 | 0.0012 |
| 10893666 | Lmnb2      | -0.062336 | 0.9999 | -0.198670 | 0.6184 | -0.150041 | 0.6135 | -0.433794 | 0.0469 |
| 10893849 | Uqcr       | -0.127010 | 0.9659 | -0.165053 | 0.5491 | -0.344370 | 0.0309 | -0.211087 | 0.2498 |
| 10893899 | Gamt       | 0.650897  | 0.4943 | -0.398884 | 0.3321 | -0.403219 | 0.1986 | -0.589599 | 0.0399 |
| 10893983 | Med16      | -0.053799 | 0.9999 | -0.212451 | 0.3649 | -0.388250 | 0.0132 | -0.307919 | 0.0579 |
| 10894333 | Myo1f      | 0.883234  | 0.2371 | -0.661464 | 0.0728 | -0.765016 | 0.0130 | -0.831625 | 0.0059 |
| 10894498 | LOC362855  | 0.055749  | 0.9999 | 0.215336  | 0.4480 | 0.359094  | 0.0488 | 0.241263  | 0.2419 |
| 10894695 | Igf1       | 0.532090  | 0.9507 | -1.033774 | 0.1114 | -1.178993 | 0.0266 | -2.146258 | 0.0000 |
| 10894705 | ---        | -0.249533 | 0.7905 | -0.199797 | 0.3651 | -0.312016 | 0.0378 | -0.311022 | 0.0384 |
| 10894897 | Hal        | 0.016782  | 0.9999 | 0.105245  | 0.6647 | 0.037696  | 0.8624 | 0.252644  | 0.0462 |
| 10894999 | Tmcc3      | 0.027201  | 0.9999 | -0.339430 | 0.1675 | -0.533600 | 0.0048 | -0.516716 | 0.0054 |
| 10895069 | Btg1       | 0.055186  | 0.9999 | 0.364977  | 0.0976 | 0.500047  | 0.0053 | 0.514417  | 0.0034 |
| 10895075 | Dcn        | 0.726385  | 0.9549 | -1.408948 | 0.1307 | -1.853180 | 0.0125 | -2.240753 | 0.0019 |
| 10895083 | Lum        | 0.572787  | 0.9374 | -1.497510 | 0.0131 | -2.494604 | 0.0000 | -2.787352 | 0.0000 |
| 10895144 | Duspb6     | -0.603190 | 0.7200 | -0.670606 | 0.0549 | -0.666475 | 0.0272 | -0.882379 | 0.0023 |
| 10895152 | Kitlg      | 0.082539  | 0.9999 | -0.869638 | 0.0109 | -0.341350 | 0.3636 | -0.469132 | 0.1765 |
| 10895337 | Pawr       | -0.041229 | 0.9999 | 0.715615  | 0.0069 | 0.911824  | 0.0002 | 1.073576  | 0.0000 |

|          |            |           |        |           |        |           |        |           |        |
|----------|------------|-----------|--------|-----------|--------|-----------|--------|-----------|--------|
| 10895344 | E2f7       | -0.118345 | 0.9972 | -0.372311 | 0.1965 | -0.466664 | 0.0350 | -0.663799 | 0.0017 |
| 10895359 | Csrp2      | -0.010613 | 0.9999 | 0.665573  | 0.0228 | 0.539056  | 0.0424 | 0.561494  | 0.0332 |
| 10895406 | Phlda1     | -0.212909 | 0.9872 | -0.597528 | 0.1129 | -0.622470 | 0.0454 | -0.627711 | 0.0437 |
| 10895456 | ---        | 0.221967  | 0.7200 | 0.184569  | 0.1984 | 0.142808  | 0.2478 | 0.246218  | 0.0234 |
| 10895458 | Zfc3h1     | 0.145561  | 0.9936 | 0.299813  | 0.4431 | 0.526836  | 0.0352 | 0.331955  | 0.2460 |
| 10895585 | Lyc2       | 0.067732  | 0.9999 | -0.665608 | 0.0125 | -0.638260 | 0.0080 | -0.803996 | 0.0006 |
| 10895600 | Mdm1       | -0.052638 | 0.9999 | -0.261635 | 0.2651 | -0.363683 | 0.0334 | -0.357204 | 0.0366 |
| 10895747 | Avpr1a     | -0.114453 | 0.9880 | -0.404984 | 0.0302 | -0.284241 | 0.0998 | -0.338054 | 0.0439 |
| 10895797 | Cdk4       | 0.070263  | 0.9921 | -0.304160 | 0.0175 | -0.504143 | 0.0000 | -0.424583 | 0.0002 |
| 10895980 | Tac2       | 0.026256  | 0.9999 | -0.197092 | 0.2653 | -0.258204 | 0.0469 | -0.185473 | 0.1957 |
| 10896028 | Pgcp       | 0.453391  | 0.8614 | -0.893853 | 0.0165 | -1.160936 | 0.0005 | -1.475083 | 0.0000 |
| 10896040 | RGD1562404 | -0.123060 | 0.9921 | -0.168526 | 0.6391 | -0.452883 | 0.0157 | -0.233878 | 0.2936 |
| 10896225 | Rps29      | -0.057407 | 0.9977 | -0.150243 | 0.3460 | -0.229080 | 0.0370 | -0.182557 | 0.1172 |
| 10896263 | Cthrc1     | 0.169425  | 0.9999 | -0.091730 | 0.9495 | -0.463792 | 0.3799 | -1.100790 | 0.0100 |
| 10896284 | Rims2      | -0.112232 | 0.8437 | -0.133784 | 0.1549 | -0.257164 | 0.0004 | -0.135568 | 0.0775 |
| 10896322 | Tm7sf4     | 0.074984  | 0.9934 | -0.340127 | 0.0148 | -0.391414 | 0.0019 | -0.220117 | 0.1024 |
| 10896503 | Aard       | 0.078563  | 0.9999 | -0.688631 | 0.2732 | -0.858485 | 0.0638 | -1.161038 | 0.0086 |
| 10896558 | Col14a1    | 0.726257  | 0.8045 | -2.602219 | 0.0000 | -2.636315 | 0.0000 | -3.145861 | 0.0000 |
| 10896632 | Zhx2       | 0.039006  | 0.9999 | 0.600302  | 0.0155 | 0.546865  | 0.0147 | 0.557558  | 0.0118 |
| 10896772 | Sqle       | -0.192730 | 0.9620 | 0.201954  | 0.5897 | 0.287639  | 0.2140 | 0.465201  | 0.0249 |
| 10896836 | Efr3a      | 0.235061  | 0.9247 | 0.150796  | 0.7444 | 0.489578  | 0.0224 | 0.366591  | 0.1076 |
| 10896935 | Wisp1      | -0.020492 | 0.9999 | 1.202074  | 0.0091 | 1.387284  | 0.0009 | 1.282062  | 0.0017 |
| 10896964 | ---        | -0.425393 | 0.9441 | -0.541322 | 0.3877 | -0.708573 | 0.1015 | -1.035210 | 0.0107 |
| 10897039 | ---        | -0.269077 | 0.8614 | -0.183402 | 0.5983 | -0.242796 | 0.2690 | -0.403443 | 0.0366 |
| 10897045 | RGD1359378 | 0.114107  | 0.9942 | 0.211843  | 0.5318 | 0.390661  | 0.0538 | 0.503131  | 0.0097 |
| 10897068 | Zfp41      | 0.003180  | 0.9999 | -0.269027 | 0.1429 | -0.207681 | 0.1961 | -0.295048 | 0.0464 |
| 10897096 | Gsdmd      | -0.049648 | 0.9999 | -0.274105 | 0.1585 | -0.216062 | 0.1998 | -0.339252 | 0.0257 |
| 10897194 | Maf1       | 0.207813  | 0.9063 | 0.193422  | 0.5209 | 0.393115  | 0.0287 | 0.283369  | 0.1455 |
| 10897285 | Scx        | -0.095559 | 0.9990 | 0.643842  | 0.0017 | 0.584822  | 0.0023 | 0.486619  | 0.0104 |
| 10897419 | Ncf4       | 0.022909  | 0.9999 | -0.167846 | 0.6217 | -0.383605 | 0.0370 | -0.164928 | 0.4893 |
| 10897465 | Cyth4      | 0.292416  | 0.8619 | -0.649319 | 0.0059 | -0.793699 | 0.0003 | -0.743778 | 0.0005 |
| 10897547 | Triobp     | -0.073514 | 0.9972 | -0.119468 | 0.6502 | -0.328502 | 0.0157 | -0.199798 | 0.1915 |
| 10897852 | Tnrc6b     | 0.370712  | 0.7200 | 0.211422  | 0.5107 | 0.427946  | 0.0269 | 0.343646  | 0.0896 |
| 10897919 | Ep300      | 0.186823  | 0.9620 | 0.340930  | 0.2172 | 0.554692  | 0.0068 | 0.495704  | 0.0155 |
| 10898022 | Csdc2      | -0.044441 | 0.9999 | 0.278217  | 0.3971 | 0.346733  | 0.1298 | 0.514286  | 0.0157 |
| 10898315 | Fbln1      | 0.342617  | 0.9734 | -0.912396 | 0.0846 | -1.298884 | 0.0030 | -1.322645 | 0.0019 |
| 10898573 | Ncaph2     | 0.015259  | 0.9999 | -0.292396 | 0.1153 | -0.189439 | 0.2737 | -0.399843 | 0.0064 |
| 10898676 | Lrrk2      | 0.058627  | 0.9999 | 0.398155  | 0.1869 | 0.705649  | 0.0021 | 0.696354  | 0.0018 |
| 10898911 | Arid2      | 0.264276  | 0.8669 | 0.346330  | 0.1889 | 0.450983  | 0.0260 | 0.345302  | 0.1079 |
| 10899073 | Troap      | -0.054869 | 0.9999 | -0.554135 | 0.0565 | -0.722176 | 0.0034 | -0.945175 | 0.0001 |
| 10899174 | Smardc1    | 0.106002  | 0.9814 | -0.135696 | 0.5912 | -0.271335 | 0.0586 | -0.331825 | 0.0170 |
| 10899209 | Dip2b      | 0.112619  | 0.9921 | 0.217541  | 0.4148 | 0.406193  | 0.0185 | 0.251420  | 0.1937 |
| 10899354 | Acvrl1     | 0.026932  | 0.9999 | -0.545442 | 0.0463 | -0.684832 | 0.0035 | -0.819185 | 0.0004 |
| 10899367 | Acvrlb     | 0.144408  | 0.9990 | 0.279634  | 0.5965 | 0.777517  | 0.0070 | 0.563791  | 0.0599 |
| 10899441 | Tenc1      | 0.008941  | 0.9999 | -0.294717 | 0.3247 | -0.452150 | 0.0306 | -0.568365 | 0.0048 |
| 10899465 | Igfbp6     | 0.578176  | 0.8669 | -1.033247 | 0.0435 | -0.772637 | 0.0956 | -1.139450 | 0.0087 |
| 10899499 | Esp11      | 0.136555  | 0.9921 | -0.301481 | 0.3802 | -0.311010 | 0.2235 | -0.545500 | 0.0156 |

|          |              |           |        |           |        |           |        |           |        |
|----------|--------------|-----------|--------|-----------|--------|-----------|--------|-----------|--------|
| 10899609 | Hoxc5        | -0.211570 | 0.8437 | -0.164233 | 0.4789 | -0.296411 | 0.0388 | -0.278954 | 0.0551 |
| 10899644 | Nckap11      | 0.541594  | 0.2371 | -0.375774 | 0.0958 | -0.561498 | 0.0023 | -0.407725 | 0.0287 |
| 10899873 | ---          | -0.024559 | 0.9999 | 0.198670  | 0.2718 | 0.021822  | 0.9315 | 0.296730  | 0.0216 |
| 10899913 | Dgka         | 0.023843  | 0.9999 | 0.386954  | 0.0162 | 0.525793  | 0.0003 | 0.484083  | 0.0007 |
| 10900112 | ---          | 0.154345  | 0.8669 | 0.061031  | 0.8323 | 0.109792  | 0.4602 | 0.277121  | 0.0171 |
| 10900212 | Tbxa2r       | 0.313458  | 0.8437 | -0.221853 | 0.5410 | -0.444504 | 0.0366 | -0.264437 | 0.2863 |
| 10900306 | Eef2         | 0.025837  | 0.9999 | -0.014637 | 0.9673 | -0.064367 | 0.6307 | -0.192690 | 0.0481 |
| 10900358 | Gadd45b      | -0.066636 | 0.9999 | 0.623360  | 0.0116 | 0.489362  | 0.0313 | 0.651743  | 0.0028 |
| 10900511 | Reep6        | -0.125668 | 0.9582 | 0.256509  | 0.1091 | 0.397358  | 0.0021 | 0.448492  | 0.0004 |
| 10900545 | Ndufs7       | -0.027408 | 0.9999 | -0.281656 | 0.2011 | -0.273801 | 0.1205 | -0.348581 | 0.0389 |
| 10900618 | Gpx4         | -0.123686 | 0.9310 | -0.183772 | 0.2535 | -0.283097 | 0.0152 | -0.178781 | 0.1670 |
| 10900651 | Abca7        | 0.133212  | 0.9921 | 0.427957  | 0.1171 | 0.554131  | 0.0116 | 0.543193  | 0.0124 |
| 10900782 | Fstl3        | -0.269214 | 0.9921 | 1.590407  | 0.0008 | 1.633475  | 0.0003 | 1.607481  | 0.0003 |
| 10901166 | Angptl4      | 0.140144  | 0.9999 | 0.935198  | 0.2906 | 1.307920  | 0.0404 | 1.293844  | 0.0434 |
| 10901231 | Timp3        | 0.129667  | 0.9999 | 1.585252  | 0.0000 | 1.447278  | 0.0000 | 1.612174  | 0.0000 |
| 10901413 | Txnrd1       | -0.164859 | 0.9819 | 0.043835  | 0.9534 | 0.570688  | 0.0096 | 0.385768  | 0.1015 |
| 10901538 | LOC100310874 | 0.094509  | 0.9999 | -0.509764 | 0.2440 | -0.820633 | 0.0101 | -0.813601 | 0.0099 |
| 10901722 | Nr1h4        | 0.200932  | 0.9001 | -0.853118 | 0.0000 | -0.848208 | 0.0000 | -0.956170 | 0.0000 |
| 10901783 | Apaf1        | 0.230497  | 0.9620 | 0.343778  | 0.3708 | 0.581294  | 0.0246 | 0.283205  | 0.3708 |
| 10901823 | Tmpo         | 0.098322  | 0.9985 | -0.329239 | 0.1825 | -0.205632 | 0.3686 | -0.635520 | 0.0006 |
| 10901842 | Nedd1        | -0.084204 | 0.9999 | 0.193471  | 0.6918 | 0.574619  | 0.0176 | 0.589835  | 0.0135 |
| 10902022 | ---          | -0.099400 | 0.9589 | -0.171492 | 0.2211 | -0.076029 | 0.5962 | -0.213770 | 0.0448 |
| 10902024 | Tmtc3        | 0.011658  | 0.9999 | 0.306505  | 0.3462 | 0.509732  | 0.0221 | 0.499868  | 0.0241 |
| 10902082 | Tmtc2        | 0.119247  | 0.9310 | -0.246117 | 0.0651 | -0.401086 | 0.0004 | -0.195818 | 0.1037 |
| 10902467 | LOC499782    | -0.032980 | 0.9999 | -0.229223 | 0.2777 | -0.416993 | 0.0054 | -0.381737 | 0.0101 |
| 10902534 | Yeats4       | 0.005896  | 0.9999 | -0.152394 | 0.6574 | -0.388558 | 0.0293 | -0.291473 | 0.1273 |
| 10902547 | Lyz2         | 0.849785  | 0.9013 | -1.883962 | 0.0180 | -2.042547 | 0.0042 | -2.691421 | 0.0002 |
| 10902662 | Irak3        | 0.288317  | 0.9620 | -0.487522 | 0.2691 | -0.514234 | 0.1274 | -0.661463 | 0.0396 |
| 10902708 | Rassf3       | -0.012429 | 0.9999 | 0.443898  | 0.0945 | 0.452772  | 0.0413 | 0.271637  | 0.2945 |
| 10902714 | Tbk1         | 0.260744  | 0.9544 | 0.404172  | 0.2771 | 0.718857  | 0.0065 | 0.531967  | 0.0511 |
| 10902804 | Mon2         | 0.090236  | 0.9921 | 0.201106  | 0.3461 | 0.312414  | 0.0333 | 0.160776  | 0.3675 |
| 10902868 | Slc16a7      | -0.029404 | 0.9999 | -0.388921 | 0.0376 | -0.575458 | 0.0004 | -0.412825 | 0.0101 |
| 10902957 | Pip4k2c      | -0.068838 | 0.9977 | 0.269265  | 0.0803 | 0.319113  | 0.0126 | 0.354063  | 0.0047 |
| 10903013 | Mars         | -0.148973 | 0.9867 | 0.426063  | 0.0926 | 0.487379  | 0.0201 | 0.526536  | 0.0104 |
| 10903206 | ---          | 0.151367  | 0.9999 | -0.855393 | 0.3196 | -0.907805 | 0.1607 | -1.510520 | 0.0100 |
| 10903284 | RGD1565493   | -0.170411 | 0.7200 | -0.152793 | 0.1818 | -0.185869 | 0.0366 | -0.013531 | 0.9391 |
| 10903294 | RGD1565493   | -0.078847 | 0.9921 | -0.003146 | 0.9963 | -0.299216 | 0.0210 | -0.194872 | 0.1750 |
| 10903346 | Pabpc1       | 0.124090  | 0.9624 | -0.155243 | 0.5262 | -0.100167 | 0.6166 | -0.340700 | 0.0171 |
| 10903400 | Ubr5         | 0.109953  | 0.9921 | 0.340110  | 0.0850 | 0.485450  | 0.0029 | 0.426458  | 0.0080 |
| 10903501 | Lrp12        | 0.012042  | 0.9999 | 0.120998  | 0.7847 | 0.403085  | 0.0384 | 0.262012  | 0.2361 |
| 10903524 | Abra         | -0.062658 | 0.9999 | 0.489936  | 0.5853 | 1.083734  | 0.0311 | 0.573627  | 0.3439 |
| 10903529 | Angpt1       | 0.636309  | 0.7200 | -0.974989 | 0.0048 | -1.181825 | 0.0003 | -1.068801 | 0.0006 |
| 10903538 | Rspo2        | -0.169712 | 0.9095 | -0.101267 | 0.7525 | -0.319553 | 0.0300 | 0.076235  | 0.7439 |
| 10903707 | ---          | -0.036408 | 0.9999 | -0.184494 | 0.3288 | -0.283630 | 0.0312 | -0.264315 | 0.0471 |
| 10903763 | Taf2         | -0.044397 | 0.9999 | 0.128027  | 0.8338 | 0.520112  | 0.0378 | 0.203700  | 0.5461 |
| 10903790 | Dscc1        | -0.014377 | 0.9999 | -0.528245 | 0.0692 | -0.702090 | 0.0039 | -0.881199 | 0.0003 |
| 10903816 | Sntb1        | -0.241829 | 0.9921 | -0.775012 | 0.0890 | -0.725063 | 0.0613 | -0.846070 | 0.0251 |

|          |              |           |        |           |        |           |        |           |        |
|----------|--------------|-----------|--------|-----------|--------|-----------|--------|-----------|--------|
| 10903860 | Zhx1         | 0.157705  | 0.9867 | 0.355877  | 0.2322 | 0.450865  | 0.0442 | 0.371307  | 0.1168 |
| 10904161 | Sla          | 0.223814  | 0.8541 | -0.401752 | 0.0169 | -0.470831 | 0.0019 | -0.354369 | 0.0193 |
| 10904169 | Ndrp1        | 0.357987  | 0.7409 | -1.057552 | 0.0000 | -1.075149 | 0.0000 | -1.152164 | 0.0000 |
| 10904202 | Zfat         | 0.184542  | 0.9819 | 0.354525  | 0.3224 | 0.526317  | 0.0364 | 0.326778  | 0.2588 |
| 10904377 | Ptk2         | -0.007771 | 0.9999 | 0.531711  | 0.0138 | 0.405042  | 0.0414 | 0.265026  | 0.2402 |
| 10904462 | RGD1559695   | -0.179038 | 0.7401 | -0.237124 | 0.0392 | -0.173985 | 0.0972 | -0.176622 | 0.0962 |
| 10904948 | Dgat1        | -0.006781 | 0.9999 | 0.087936  | 0.7499 | 0.278923  | 0.0282 | 0.166123  | 0.2569 |
| 10905091 | Recql4       | -0.094477 | 0.9921 | -0.196886 | 0.3708 | -0.300880 | 0.0443 | -0.225014 | 0.1670 |
| 10905307 | Clqtnf6      | 0.222034  | 0.9968 | -0.278117 | 0.7515 | -0.904487 | 0.0246 | -0.761937 | 0.0660 |
| 10905316 | Rac2         | 0.225207  | 0.9990 | -0.622250 | 0.3345 | -0.977264 | 0.0288 | -0.857453 | 0.0607 |
| 10905439 | Csnk1e       | 0.110831  | 0.9872 | 0.272843  | 0.1901 | 0.338772  | 0.0349 | 0.348902  | 0.0286 |
| 10905773 | Nfam1        | -0.014516 | 0.9999 | -0.431265 | 0.0814 | -0.381479 | 0.0743 | -0.559760 | 0.0054 |
| 10905909 | RGD1566029   | -0.018552 | 0.9999 | 0.331824  | 0.2651 | 0.210881  | 0.4328 | 0.488429  | 0.0224 |
| 10906592 | Slc38a1      | -0.283640 | 0.9010 | 0.317152  | 0.3751 | 0.446102  | 0.0695 | 0.507250  | 0.0349 |
| 10906608 | Slc38a2      | -0.020913 | 0.9999 | 0.228137  | 0.3444 | 0.562817  | 0.0006 | 0.500740  | 0.0017 |
| 10906736 | Vdr          | -0.104416 | 0.9921 | -0.186836 | 0.4828 | -0.378986 | 0.0196 | -0.391181 | 0.0146 |
| 10906835 | H1fnt        | -0.257716 | 0.7401 | -0.088562 | 0.7920 | -0.290203 | 0.0487 | -0.032259 | 0.9082 |
| 10906950 | LOC100361136 | 0.041530  | 0.9999 | 0.210579  | 0.3220 | 0.340086  | 0.0217 | 0.217283  | 0.1884 |
| 10906975 | ---          | 0.347803  | 0.8614 | 0.497930  | 0.1099 | 0.758029  | 0.0026 | 0.621726  | 0.0127 |
| 10906977 | Mll2         | 0.135662  | 0.9977 | 0.370016  | 0.3170 | 0.495705  | 0.0605 | 0.556998  | 0.0315 |
| 10907178 | Racgap1      | 0.118447  | 0.9999 | -1.094831 | 0.0339 | -1.262934 | 0.0049 | -1.889617 | 0.0000 |
| 10907302 | Bin2         | 0.187667  | 0.8454 | -0.349899 | 0.0112 | -0.383943 | 0.0021 | -0.382435 | 0.0017 |
| 10907605 | Map3k12      | 0.045353  | 0.9999 | 0.383030  | 0.0669 | 0.602050  | 0.0006 | 0.404227  | 0.0220 |
| 10907637 | Calcoco1     | 0.248268  | 0.9310 | 0.532473  | 0.0519 | 0.589569  | 0.0118 | 0.750223  | 0.0010 |
| 10907689 | Itga5        | -0.175164 | 0.9921 | 0.839589  | 0.0034 | 0.770356  | 0.0037 | 0.760743  | 0.0034 |
| 10907763 | Uhrf1bp11    | -0.103128 | 0.9999 | 0.628374  | 0.0187 | 0.920272  | 0.0002 | 0.912853  | 0.0001 |
| 10907825 | Casp4        | 0.347703  | 0.9620 | -0.676949 | 0.1515 | -1.086188 | 0.0031 | -1.112646 | 0.0019 |
| 10907845 | Pdgfd        | 0.274153  | 0.9632 | -0.309165 | 0.6069 | -0.513973 | 0.1424 | -0.785212 | 0.0152 |
| 10907869 | Mmp12        | 0.554936  | 0.9921 | -2.038583 | 0.0274 | -2.704167 | 0.0009 | -2.383996 | 0.0026 |
| 10907952 | Tmem123      | -0.038556 | 0.9999 | 0.315298  | 0.0598 | 0.375626  | 0.0082 | 0.423568  | 0.0022 |
| 10907962 | Trpc6        | -0.175330 | 0.9626 | 0.248963  | 0.4414 | 0.517735  | 0.0112 | 0.145998  | 0.6183 |
| 10908098 | ---          | -0.121086 | 0.9999 | -0.464825 | 0.3640 | -0.617555 | 0.0851 | -0.889631 | 0.0083 |
| 10908108 | RGD1309410   | -0.124808 | 0.9921 | -0.244270 | 0.4410 | -0.369733 | 0.0757 | -0.422813 | 0.0375 |
| 10908127 | Nek2         | -0.097541 | 0.9999 | -1.151200 | 0.0653 | -1.134850 | 0.0341 | -1.759715 | 0.0006 |
| 10908158 | Mbd3l1       | -0.301113 | 0.4060 | -0.238928 | 0.1124 | -0.355903 | 0.0033 | -0.249643 | 0.0448 |
| 10908173 | ---          | -0.116322 | 0.7316 | -0.087819 | 0.3461 | -0.141400 | 0.0270 | -0.091842 | 0.1986 |
| 10908177 | ---          | 0.065360  | 0.9852 | 0.091820  | 0.5646 | 0.068361  | 0.5745 | 0.207023  | 0.0209 |
| 10908319 | Icam1        | -0.051202 | 0.9999 | -0.779482 | 0.0052 | -0.773551 | 0.0026 | -0.835971 | 0.0009 |
| 10908562 | Lppr2        | -0.109265 | 0.9852 | 0.314841  | 0.0817 | 0.294536  | 0.0566 | 0.374050  | 0.0118 |
| 10908658 | ---          | -0.242613 | 0.9435 | 0.570926  | 0.0331 | 0.823261  | 0.0004 | 0.801137  | 0.0005 |
| 10908702 | Ncapd3       | 0.016657  | 0.9999 | -0.251283 | 0.5048 | -0.364492 | 0.1280 | -0.524712 | 0.0189 |
| 10908764 | Snx19        | -0.032946 | 0.9999 | 0.413207  | 0.0082 | 0.433604  | 0.0024 | 0.354074  | 0.0124 |
| 10908776 | Adamts8      | -0.239016 | 0.9980 | 3.154660  | 0.0000 | 3.247123  | 0.0000 | 3.600251  | 0.0000 |
| 10908788 | Zbtb44       | 0.137935  | 0.9795 | 0.233153  | 0.3961 | 0.392616  | 0.0305 | 0.352205  | 0.0571 |
| 10908827 | Prdm10       | -0.055874 | 0.9999 | 0.463973  | 0.4358 | 0.955038  | 0.0113 | 0.535196  | 0.2138 |
| 10908829 | Prdm10       | 0.092700  | 0.9985 | 0.183277  | 0.5635 | 0.415655  | 0.0209 | 0.387805  | 0.0315 |
| 10909072 | Esam         | -0.182611 | 0.9931 | -0.777999 | 0.0241 | -0.619681 | 0.0486 | -0.575997 | 0.0728 |



|          |            |           |        |           |        |           |        |           |        |
|----------|------------|-----------|--------|-----------|--------|-----------|--------|-----------|--------|
| 10909091 | Siae       | 0.160352  | 0.9921 | -0.236675 | 0.5928 | -0.628300 | 0.0099 | -0.496692 | 0.0468 |
| 10909239 | Olr1259    | 0.113280  | 0.8773 | 0.134623  | 0.2735 | 0.177438  | 0.0487 | 0.113374  | 0.2735 |
| 10909319 | Olr1341    | 0.052249  | 0.9942 | 0.005618  | 0.9867 | -0.028225 | 0.8568 | 0.193133  | 0.0342 |
| 10909382 | Vof16      | -0.004221 | 0.9999 | 0.753532  | 0.2051 | 0.934937  | 0.0403 | 0.635107  | 0.2135 |
| 10909407 | Thy1       | -0.173721 | 0.9999 | -1.957107 | 0.0001 | -2.832220 | 0.0000 | -2.122323 | 0.0000 |
| 10909446 | Mcama      | -0.331765 | 0.8614 | 0.976479  | 0.0002 | 0.888442  | 0.0003 | 1.134295  | 0.0000 |
| 10909480 | H2afx      | 0.061862  | 0.9999 | -0.301755 | 0.1786 | -0.467820 | 0.0063 | -0.433253 | 0.0107 |
| 10909639 | Fxyd6      | 0.423459  | 0.8562 | -0.903702 | 0.0042 | -1.120113 | 0.0002 | -1.141045 | 0.0001 |
| 10909646 | Fxyd2      | 0.123890  | 0.9921 | -0.434356 | 0.0392 | -0.491453 | 0.0070 | -0.340656 | 0.0752 |
| 10909761 | Cadm1      | 0.085966  | 0.9999 | -0.666053 | 0.0034 | -1.040624 | 0.0000 | -0.733875 | 0.0004 |
| 10909994 | Kdelc2     | 0.152762  | 0.9630 | -0.290019 | 0.2327 | -0.405438 | 0.0250 | -0.519758 | 0.0028 |
| 10910047 | Sln        | 0.002422  | 0.9999 | 0.654133  | 0.3544 | 0.998038  | 0.0397 | 0.309142  | 0.6645 |
| 10910049 | Gldn       | 0.027176  | 0.9999 | 0.529450  | 0.0022 | 0.439901  | 0.0064 | 0.407038  | 0.0109 |
| 10910094 | Ireb2      | 0.093628  | 0.9990 | 0.214267  | 0.4947 | 0.378783  | 0.0498 | 0.236934  | 0.2893 |
| 10910237 | Cspg4      | -0.319823 | 0.8619 | 0.355423  | 0.2905 | 0.563962  | 0.0184 | 0.572009  | 0.0157 |
| 10910270 | Sin3a      | 0.156999  | 0.9277 | 0.129328  | 0.6430 | 0.317582  | 0.0297 | 0.208317  | 0.2029 |
| 10910376 | Cyp1a1     | -0.428909 | 0.9921 | -2.077599 | 0.0024 | -1.609910 | 0.0120 | -2.384879 | 0.0002 |
| 10910406 | Sema7a     | 0.187498  | 0.9921 | 0.787866  | 0.0203 | 0.866500  | 0.0042 | 0.862220  | 0.0036 |
| 10910458 | Rpl38      | -0.128427 | 0.9451 | -0.155737 | 0.4275 | -0.309230 | 0.0131 | -0.161893 | 0.2702 |
| 10910473 | Hcn4       | 0.083927  | 0.9999 | 0.364503  | 0.3708 | 0.310009  | 0.3377 | 0.681535  | 0.0109 |
| 10910482 | Adpgk      | 0.032224  | 0.9999 | -0.313695 | 0.3571 | -0.496082 | 0.0328 | -0.565001 | 0.0127 |
| 10910490 | Hexa       | 0.168837  | 0.9528 | 0.333757  | 0.1096 | 0.335194  | 0.0535 | 0.396802  | 0.0185 |
| 10910668 | Anp32a     | 0.147231  | 0.9624 | 0.083797  | 0.8384 | 0.342340  | 0.0405 | 0.366689  | 0.0262 |
| 10910708 | Cln6       | 0.092634  | 0.9998 | -0.356113 | 0.1473 | -0.479194 | 0.0129 | -0.389627 | 0.0493 |
| 10910754 | Rpl4       | -0.040330 | 0.9999 | -0.208837 | 0.1921 | -0.221853 | 0.0799 | -0.269957 | 0.0272 |
| 10910805 | ---        | 0.119481  | 0.9872 | 0.293664  | 0.1912 | 0.375781  | 0.0296 | 0.295532  | 0.1054 |
| 10910988 | Pif1       | -0.113194 | 0.9936 | -0.383090 | 0.1032 | -0.500436 | 0.0088 | -0.436936 | 0.0227 |
| 10911010 | Ns5atp9    | -0.008325 | 0.9999 | -0.971966 | 0.2298 | -1.061875 | 0.0898 | -1.899150 | 0.0011 |
| 10911016 | Csnk1g1    | -0.002803 | 0.9999 | 0.110611  | 0.7606 | 0.316738  | 0.0572 | 0.375926  | 0.0201 |
| 10911048 | Dapk2      | 0.050125  | 0.9999 | 0.142823  | 0.6149 | 0.141031  | 0.4720 | 0.385074  | 0.0106 |
| 10911062 | Herc1      | 0.247626  | 0.9136 | 0.277046  | 0.4018 | 0.499057  | 0.0210 | 0.404604  | 0.0713 |
| 10911380 | Aldh1a2    | 0.402631  | 0.9620 | -0.737513 | 0.1951 | -1.139149 | 0.0080 | -1.215771 | 0.0037 |
| 10911431 | Rfx7       | 0.093094  | 0.9990 | 0.354595  | 0.1347 | 0.553325  | 0.0032 | 0.577448  | 0.0016 |
| 10911510 | Ccpg1      | 0.413516  | 0.7312 | 0.490504  | 0.0592 | 0.445447  | 0.0487 | 0.467364  | 0.0370 |
| 10911742 | Klh131     | -0.144342 | 0.9843 | -0.191452 | 0.5910 | -0.270998 | 0.2202 | -0.558784 | 0.0035 |
| 10911747 | Gclc       | -0.085305 | 0.9999 | 0.168928  | 0.7176 | 0.428211  | 0.0625 | 0.521370  | 0.0191 |
| 10911795 | LOC499782  | -0.032047 | 0.9999 | -0.222400 | 0.2271 | -0.366987 | 0.0068 | -0.346253 | 0.0099 |
| 10911849 | ---        | -0.284734 | 0.7316 | -0.286193 | 0.1535 | -0.319870 | 0.0450 | -0.341356 | 0.0305 |
| 10911859 | Senp6      | 0.133919  | 0.9819 | 0.249705  | 0.3350 | 0.404761  | 0.0238 | 0.268222  | 0.1753 |
| 10911947 | Ttk        | 0.288579  | 0.9927 | -0.836838 | 0.1894 | -1.145687 | 0.0186 | -1.471868 | 0.0018 |
| 10911988 | ---        | 0.252354  | 0.8614 | 0.205516  | 0.5099 | 0.247371  | 0.2388 | 0.380124  | 0.0448 |
| 10912003 | Tpbg       | -0.166204 | 0.9624 | -0.415765 | 0.0662 | -0.318598 | 0.1158 | -0.439136 | 0.0216 |
| 10912088 | Nt5e       | -0.083494 | 0.9999 | -1.241975 | 0.0004 | -0.936557 | 0.0044 | -1.080550 | 0.0008 |
| 10912112 | Bcl2a1d    | 0.134227  | 0.9729 | -0.330404 | 0.1189 | -0.568659 | 0.0008 | -0.337608 | 0.0549 |
| 10912218 | Plscr1     | -0.262564 | 0.9475 | -0.485999 | 0.1319 | -0.738036 | 0.0038 | -0.639240 | 0.0117 |
| 10912245 | Plscr4     | 0.513414  | 0.7905 | -0.628809 | 0.0866 | -0.594474 | 0.0569 | -0.676942 | 0.0268 |
| 10912289 | RGD1560736 | 0.410572  | 0.8562 | -0.369129 | 0.3960 | -0.605199 | 0.0355 | -0.491164 | 0.1054 |

|          |            |           |        |           |        |           |        |           |        |
|----------|------------|-----------|--------|-----------|--------|-----------|--------|-----------|--------|
| 10912439 | Rbp1       | -0.192730 | 0.9998 | -0.140567 | 0.9027 | -0.866732 | 0.0349 | -0.771226 | 0.0671 |
| 10912444 | Rbp2       | -0.131485 | 0.9852 | -0.259089 | 0.3217 | -0.230445 | 0.2690 | -0.385719 | 0.0350 |
| 10912525 | Stag1      | 0.265690  | 0.9224 | 0.182777  | 0.7141 | 0.546622  | 0.0233 | 0.148700  | 0.6812 |
| 10912669 | Acad11     | 0.076459  | 0.9852 | 0.128898  | 0.4366 | 0.266063  | 0.0112 | 0.190122  | 0.0866 |
| 10912757 | Pik3r4     | 0.281051  | 0.8437 | 0.382151  | 0.0929 | 0.426489  | 0.0238 | 0.190347  | 0.4237 |
| 10912826 | Wdr51a     | -0.060809 | 0.9999 | -0.348570 | 0.0549 | -0.578263 | 0.0002 | -0.582346 | 0.0002 |
| 10912883 | Vprbp      | 0.069599  | 0.9999 | 0.265012  | 0.3897 | 0.563440  | 0.0050 | 0.406683  | 0.0499 |
| 10912956 | Tmem115    | -0.077410 | 0.9999 | 0.246173  | 0.3350 | 0.455359  | 0.0090 | 0.414548  | 0.0174 |
| 10912977 | Zmynd10    | 0.027253  | 0.9999 | 0.085676  | 0.7291 | 0.241633  | 0.0411 | 0.274250  | 0.0179 |
| 10913023 | Ifrd2      | -0.121912 | 0.9921 | 0.095659  | 0.8397 | 0.391658  | 0.0414 | 0.317485  | 0.1187 |
| 10913037 | Mon1a      | 0.248962  | 0.8669 | 0.432637  | 0.0492 | 0.530694  | 0.0047 | 0.543019  | 0.0031 |
| 10913043 | Mst1r      | 0.028874  | 0.9999 | 0.248331  | 0.3486 | 0.380836  | 0.0369 | 0.312793  | 0.1028 |
| 10913078 | Traip      | 0.013330  | 0.9999 | -0.207702 | 0.3509 | -0.352899 | 0.0200 | -0.481070 | 0.0010 |
| 10913176 | RGD1311095 | 0.057219  | 0.9999 | 0.075197  | 0.8736 | 0.359481  | 0.0481 | 0.310900  | 0.1011 |
| 10913242 | Ip6k2      | 0.109083  | 0.9921 | 0.201955  | 0.5028 | 0.446282  | 0.0127 | 0.450316  | 0.0110 |
| 10913501 | Plxnb1     | 0.145954  | 0.9921 | 0.448380  | 0.1005 | 0.489141  | 0.0304 | 0.656794  | 0.0025 |
| 10913691 | Setd2      | 0.177700  | 0.9544 | 0.293218  | 0.2319 | 0.434732  | 0.0165 | 0.383437  | 0.0366 |
| 10913899 | Clasp2     | 0.207543  | 0.8973 | 0.265994  | 0.2601 | 0.373531  | 0.0300 | 0.276113  | 0.1368 |
| 10914025 | Osbpl10    | -0.066966 | 0.9999 | 0.232539  | 0.3296 | 0.342841  | 0.0401 | 0.237828  | 0.1995 |
| 10914083 | Itga9      | -0.059759 | 0.9999 | 0.383234  | 0.0153 | 0.492344  | 0.0005 | 0.359970  | 0.0106 |
| 10914153 | Ctdspl     | 0.116328  | 0.9936 | -0.428242 | 0.0664 | -0.261032 | 0.2437 | -0.524983 | 0.0065 |
| 10914314 | ---        | -0.040808 | 0.9999 | -0.137943 | 0.7359 | -0.403165 | 0.0372 | -0.325436 | 0.1118 |
| 10914331 | Myrip      | -0.164481 | 0.9942 | 0.702147  | 0.0298 | 0.687769  | 0.0156 | 0.459310  | 0.1386 |
| 10914424 | Hhat1      | 0.360816  | 0.9413 | -0.895941 | 0.0203 | -1.281851 | 0.0003 | -1.449222 | 0.0000 |
| 10914517 | Tmem42     | -0.019049 | 0.9999 | -0.183256 | 0.4112 | -0.292172 | 0.0474 | -0.284181 | 0.0560 |
| 10914546 | ---        | 0.176522  | 0.9921 | -0.716217 | 0.0224 | -0.908744 | 0.0011 | -0.776770 | 0.0044 |
| 10914853 | RGD1564081 | -0.060465 | 0.9999 | 0.494968  | 0.1155 | 0.871082  | 0.0006 | 0.651648  | 0.0091 |
| 10914877 | ---        | 0.071490  | 0.9999 | 0.645084  | 0.1299 | 1.045441  | 0.0020 | 0.654114  | 0.0636 |
| 10915131 | Fat3       | -0.236562 | 0.7200 | -0.312644 | 0.0173 | -0.247896 | 0.0399 | -0.267165 | 0.0247 |
| 10915353 | Col5a3     | 0.069814  | 0.9999 | -0.372576 | 0.2334 | -0.580178 | 0.0117 | -0.683292 | 0.0023 |
| 10915483 | S1pr2      | 0.047907  | 0.9999 | -0.456792 | 0.0806 | -0.346318 | 0.1386 | -0.538839 | 0.0122 |
| 10915567 | Yipf2      | 0.141680  | 0.9593 | 0.218815  | 0.3015 | 0.350057  | 0.0192 | 0.354296  | 0.0167 |
| 10915578 | Spc24      | -0.091160 | 0.9999 | -1.002024 | 0.0328 | -1.081945 | 0.0084 | -1.559843 | 0.0001 |
| 10915716 | Zfp653     | -0.000740 | 0.9999 | 0.322694  | 0.0656 | 0.326154  | 0.0295 | 0.271792  | 0.0810 |
| 10915751 | ---        | -0.134632 | 0.9999 | -0.734758 | 0.2030 | -0.781524 | 0.0852 | -1.317658 | 0.0018 |
| 10915787 | Dpy191     | 0.032831  | 0.9999 | 0.508030  | 0.0016 | 0.394148  | 0.0089 | 0.358777  | 0.0171 |
| 10915910 | Jam3       | -0.000655 | 0.9999 | 0.104716  | 0.8627 | 0.499409  | 0.0351 | 0.362252  | 0.1608 |
| 10915933 | Adamts15   | 0.248638  | 0.9620 | 0.546561  | 0.0973 | 0.504371  | 0.0713 | 0.579217  | 0.0339 |
| 10915942 | Adamts8    | 0.131497  | 0.9999 | 0.376372  | 0.3696 | 0.333158  | 0.3116 | 0.595772  | 0.0356 |
| 10915998 | Kcnj5      | 0.035203  | 0.9999 | 0.463791  | 0.2835 | 0.722615  | 0.0194 | 0.638921  | 0.0416 |
| 10916060 | Ddx25      | -0.077413 | 0.9999 | 0.128934  | 0.7251 | 0.047711  | 0.8781 | 0.354060  | 0.0462 |
| 10916073 | LOC680262  | -0.039505 | 0.9999 | -0.355369 | 0.3221 | -0.532695 | 0.0344 | -0.586063 | 0.0178 |
| 10916156 | ---        | 0.170882  | 0.9950 | -0.057243 | 0.9557 | -0.663506 | 0.0289 | -0.710059 | 0.0176 |
| 10916534 | Sc5dl      | -0.176135 | 0.9665 | 0.248194  | 0.4987 | 0.350114  | 0.1377 | 0.616289  | 0.0039 |
| 10916567 | Tbcel      | 0.093506  | 0.9998 | 0.405229  | 0.0890 | 0.431276  | 0.0304 | 0.538461  | 0.0051 |
| 10916598 | Arhgef12   | 0.143927  | 0.9642 | 0.320652  | 0.1438 | 0.526341  | 0.0022 | 0.368983  | 0.0349 |
| 10916659 | Oaf        | 0.081830  | 0.9999 | -0.302190 | 0.4284 | -0.601419 | 0.0131 | -0.670529 | 0.0047 |

|          |            |           |        |           |        |           |        |           |        |
|----------|------------|-----------|--------|-----------|--------|-----------|--------|-----------|--------|
| 10916697 | Nlr1       | 0.101327  | 0.9942 | -0.138242 | 0.6981 | -0.351050 | 0.0497 | -0.423787 | 0.0144 |
| 10916880 | Mll1       | 0.167858  | 0.9716 | 0.275567  | 0.3984 | 0.468335  | 0.0295 | 0.378372  | 0.0936 |
| 10916981 | Cep164     | -0.023423 | 0.9999 | 0.293343  | 0.2344 | 0.429397  | 0.0186 | 0.425417  | 0.0189 |
| 10917260 | Dixdc1     | 0.131065  | 0.9956 | 0.456483  | 0.1101 | 0.538650  | 0.0210 | 0.481311  | 0.0416 |
| 10917285 | LOC689959  | 0.018323  | 0.9999 | 0.294408  | 0.2981 | 0.418189  | 0.0388 | 0.249246  | 0.2917 |
| 10917448 | Acat1      | 0.141596  | 0.9921 | -0.357723 | 0.2327 | -0.488813 | 0.0289 | -0.500141 | 0.0240 |
| 10917462 | Cul5       | 0.124387  | 0.9968 | 0.298596  | 0.3842 | 0.491444  | 0.0318 | 0.343872  | 0.1714 |
| 10917703 | RGD1312026 | 0.015905  | 0.9999 | 0.330363  | 0.2128 | 0.430428  | 0.0323 | 0.466819  | 0.0182 |
| 10917707 | RGD1312026 | -0.155682 | 0.9653 | 0.288590  | 0.2813 | 0.459144  | 0.0161 | 0.454665  | 0.0164 |
| 10917770 | Mpi        | -0.129567 | 0.9921 | 0.258308  | 0.3649 | 0.352507  | 0.0760 | 0.479525  | 0.0109 |
| 10917924 | Neo1       | 0.102091  | 0.9990 | 0.425967  | 0.0826 | 0.600747  | 0.0031 | 0.664631  | 0.0008 |
| 10917969 | Arih1      | -0.049847 | 0.9999 | 0.342253  | 0.1282 | 0.501523  | 0.0051 | 0.472794  | 0.0074 |
| 10917998 | RGD1566296 | 0.265977  | 0.9624 | -0.573094 | 0.1382 | -0.689611 | 0.0256 | -0.671128 | 0.0295 |
| 10918031 | Kif23      | 0.159132  | 0.9999 | -0.918647 | 0.0658 | -0.916709 | 0.0320 | -1.443162 | 0.0005 |
| 10918075 | Coro2b     | 0.490777  | 0.2371 | -0.335310 | 0.1170 | -0.595205 | 0.0005 | -0.595832 | 0.0004 |
| 10918089 | Fem1b      | 0.033292  | 0.9999 | 0.162639  | 0.6583 | 0.402233  | 0.0356 | 0.239069  | 0.2842 |
| 10918169 | Smad3      | 0.021460  | 0.9999 | -0.273996 | 0.2226 | -0.312737 | 0.0699 | -0.514466 | 0.0015 |
| 10918191 | Zwilch     | 0.031641  | 0.9999 | -0.285884 | 0.7642 | -0.479033 | 0.3458 | -0.960651 | 0.0240 |
| 10918374 | Rab8b      | 0.304411  | 0.9136 | -0.473688 | 0.1668 | -0.283711 | 0.3788 | -0.654154 | 0.0124 |
| 10918383 | ---        | -0.105986 | 0.9999 | -0.447478 | 0.4064 | -0.596177 | 0.1047 | -0.767284 | 0.0291 |
| 10918509 | Ccnb2      | 0.094883  | 0.9999 | -1.302824 | 0.0497 | -1.590236 | 0.0050 | -2.102063 | 0.0002 |
| 10918600 | Cgnl1      | -0.054223 | 0.9999 | 0.617327  | 0.0357 | 0.509063  | 0.0530 | 0.498913  | 0.0600 |
| 10918945 | Tmem30a    | 0.018730  | 0.9999 | 0.082918  | 0.6956 | 0.187053  | 0.0857 | 0.216873  | 0.0408 |
| 10919103 | Me1        | -0.011065 | 0.9999 | 0.378257  | 0.0479 | 0.567987  | 0.0005 | 0.633114  | 0.0001 |
| 10919118 | Snap91     | -0.691744 | 0.7200 | 0.645473  | 0.1428 | 0.600286  | 0.1001 | 0.789004  | 0.0232 |
| 10919283 | Tbc1d2b    | 0.120639  | 0.9959 | -0.358137 | 0.2132 | -0.476250 | 0.0288 | -0.677284 | 0.0012 |
| 10919339 | Trpc1      | -0.298686 | 0.8614 | 0.382201  | 0.1816 | 0.704875  | 0.0012 | 0.610744  | 0.0042 |
| 10919453 | Pik3cb     | -0.093924 | 0.9999 | 0.619154  | 0.0148 | 0.661330  | 0.0038 | 0.903514  | 0.0001 |
| 10919637 | Tf         | 0.308778  | 0.8614 | -0.455483 | 0.1000 | -0.538042 | 0.0179 | -0.632229 | 0.0041 |
| 10919712 | Ccr1       | -0.368087 | 0.8614 | -2.231052 | 0.0000 | -2.723434 | 0.0000 | -2.791897 | 0.0000 |
| 10919798 | LOC688828  | 0.117087  | 0.9310 | 0.131063  | 0.4574 | 0.043018  | 0.8124 | 0.350515  | 0.0010 |
| 10919830 | Atp2c1     | -0.006325 | 0.9999 | 0.224971  | 0.2211 | 0.313725  | 0.0228 | 0.177020  | 0.2702 |
| 10919897 | Acy1       | 0.020851  | 0.9999 | -0.230250 | 0.2477 | -0.006269 | 0.9828 | -0.349300 | 0.0154 |
| 10920109 | Gnai2      | 0.047867  | 0.9999 | -0.235617 | 0.1362 | -0.304160 | 0.0153 | -0.304183 | 0.0144 |
| 10920148 | Sema3f     | 0.132370  | 0.9653 | -0.421957 | 0.0173 | -0.670647 | 0.0000 | -0.549635 | 0.0005 |
| 10920298 | Dag1       | 0.063322  | 0.9999 | 0.144328  | 0.7317 | 0.218835  | 0.3555 | 0.420512  | 0.0347 |
| 10920322 | P4htm      | -0.089773 | 0.9998 | 0.251365  | 0.3751 | 0.248845  | 0.2448 | 0.413079  | 0.0295 |
| 10920334 | Arih2      | 0.040825  | 0.9999 | 0.269666  | 0.2397 | 0.457247  | 0.0063 | 0.415813  | 0.0123 |
| 10920395 | Dhx30      | 0.094468  | 0.9870 | 0.148907  | 0.5099 | 0.386774  | 0.0038 | 0.167125  | 0.2953 |
| 10920461 | Nradd      | -0.048333 | 0.9999 | -0.446165 | 0.1069 | -0.579564 | 0.0099 | -0.678594 | 0.0019 |
| 10920745 | Tgfb2      | 0.333357  | 0.8614 | -0.663792 | 0.0109 | -0.809223 | 0.0006 | -0.861177 | 0.0002 |
| 10920797 | Cmc1       | 0.125993  | 0.9921 | -0.036595 | 0.9557 | -0.208944 | 0.3676 | -0.386789 | 0.0491 |
| 10920803 | Plcd1      | 0.043932  | 0.9999 | -0.384216 | 0.2172 | -0.384504 | 0.1183 | -0.552052 | 0.0169 |
| 10920868 | Scn5a      | -0.134577 | 0.9990 | 0.878297  | 0.0025 | 0.900739  | 0.0009 | 0.952286  | 0.0004 |
| 10920967 | Csrnp1     | -0.299684 | 0.9525 | 0.415049  | 0.3457 | 0.835282  | 0.0049 | 0.673349  | 0.0246 |
| 10921059 | Zfp651     | -0.006604 | 0.9999 | 0.323584  | 0.0592 | 0.409405  | 0.0047 | 0.349850  | 0.0157 |
| 10921163 | Ccr1       | 0.079442  | 0.9990 | -0.290538 | 0.1576 | -0.347196 | 0.0324 | -0.235892 | 0.1902 |

|          |            |           |        |           |        |           |        |           |        |
|----------|------------|-----------|--------|-----------|--------|-----------|--------|-----------|--------|
| 10921195 | Xiap       | 0.021487  | 0.9999 | 0.342703  | 0.0332 | 0.239743  | 0.1063 | 0.391387  | 0.0044 |
| 10921232 | Sgol1      | 0.099614  | 0.9999 | -0.446467 | 0.2052 | -0.736063 | 0.0053 | -0.727170 | 0.0050 |
| 10921274 | Satb1      | 0.131411  | 0.9990 | 0.711556  | 0.0147 | 0.548820  | 0.0410 | 0.776372  | 0.0024 |
| 10921343 | Rftn1      | -0.155583 | 0.9934 | -0.547865 | 0.0829 | -0.811401 | 0.0019 | -0.686033 | 0.0078 |
| 10921355 | Daam2      | 0.122256  | 0.9819 | -0.208061 | 0.4085 | -0.157531 | 0.4443 | -0.364758 | 0.0257 |
| 10921444 | Tomm6      | -0.056676 | 0.9999 | -0.090005 | 0.8677 | -0.459242 | 0.0290 | -0.336471 | 0.1380 |
| 10921457 | Guca1a     | -0.008358 | 0.9999 | 0.068814  | 0.8615 | 0.038961  | 0.8884 | 0.316112  | 0.0407 |
| 10921515 | RGD1305680 | 0.291896  | 0.7316 | 0.175979  | 0.5087 | 0.331806  | 0.0391 | 0.231017  | 0.1957 |
| 10921645 | LOC680835  | 0.162976  | 0.9247 | -0.188758 | 0.4064 | -0.265111 | 0.0849 | -0.386080 | 0.0075 |
| 10921672 | Mea1       | -0.090347 | 0.9620 | -0.194981 | 0.1157 | -0.279769 | 0.0049 | -0.287219 | 0.0031 |
| 10921680 | Cnpy3      | -0.091711 | 0.9999 | -0.298320 | 0.3728 | -0.453084 | 0.0468 | -0.496791 | 0.0266 |
| 10921727 | Tjap1      | 0.043060  | 0.9999 | 0.264496  | 0.2706 | 0.395563  | 0.0223 | 0.426619  | 0.0119 |
| 10921784 | Tmem63b    | 0.068909  | 0.9999 | 0.213340  | 0.3851 | 0.288814  | 0.0879 | 0.516358  | 0.0010 |
| 10921910 | Enpp4      | -0.024615 | 0.9999 | 0.297201  | 0.1936 | 0.442260  | 0.0106 | 0.470943  | 0.0054 |
| 10922145 | Tmem14a    | -0.028420 | 0.9999 | -0.308351 | 0.1008 | -0.556091 | 0.0003 | -0.456029 | 0.0022 |
| 10922286 | Dst        | 0.160899  | 0.9872 | 0.776177  | 0.0015 | 0.872319  | 0.0002 | 0.769208  | 0.0006 |
| 10922572 | Cox5b      | -0.089550 | 0.9942 | -0.215367 | 0.3352 | -0.379493 | 0.0130 | -0.377401 | 0.0126 |
| 10922650 | Inpp4a     | -0.038160 | 0.9999 | 0.207950  | 0.2507 | 0.375540  | 0.0040 | 0.181451  | 0.2300 |
| 10922701 | Eif5b      | 0.142447  | 0.9921 | 0.332719  | 0.2950 | 0.509010  | 0.0245 | 0.391945  | 0.1010 |
| 10922826 | Il1r1      | 0.045651  | 0.9999 | -1.074310 | 0.0003 | -1.074930 | 0.0001 | -1.537439 | 0.0000 |
| 10922857 | Il1rl1     | -0.291936 | 0.9923 | -1.608494 | 0.0020 | -2.093783 | 0.0000 | -2.966437 | 0.0000 |
| 10922969 | Tpp2       | 0.098039  | 0.9978 | 0.153371  | 0.6808 | 0.393955  | 0.0373 | 0.256570  | 0.2316 |
| 10923052 | Col3a1     | 0.238767  | 0.9925 | -0.528357 | 0.3861 | -0.890907 | 0.0281 | -1.220080 | 0.0017 |
| 10923104 | Wdr75      | -0.038641 | 0.9999 | 0.481397  | 0.0731 | 0.747115  | 0.0009 | 0.474758  | 0.0379 |
| 10923191 | Mfsd6      | 0.103899  | 0.9999 | 0.758728  | 0.0017 | 0.793722  | 0.0005 | 0.826638  | 0.0002 |
| 10923215 | Gls        | 0.041766  | 0.9999 | 0.311504  | 0.3415 | 0.537477  | 0.0161 | 0.342175  | 0.1670 |
| 10923237 | Myo1b      | 0.213063  | 0.9620 | -0.379664 | 0.2293 | -0.532817 | 0.0234 | -0.734022 | 0.0012 |
| 10923381 | Spats2l    | 0.283948  | 0.8932 | -0.295847 | 0.3925 | -0.377297 | 0.1157 | -0.619836 | 0.0050 |
| 10923385 | Sgol2      | -0.124856 | 0.9999 | -1.007493 | 0.0392 | -1.170649 | 0.0055 | -1.267202 | 0.0021 |
| 10923432 | Aox3       | 0.029452  | 0.9999 | -0.024339 | 0.9228 | 0.025881  | 0.8655 | 0.181150  | 0.0395 |
| 10923606 | Stradb     | -0.029221 | 0.9999 | 0.402756  | 0.3007 | 0.568467  | 0.0410 | 0.532491  | 0.0596 |
| 10923687 | Bmpr2      | 0.075107  | 0.9999 | 0.333776  | 0.1589 | 0.509601  | 0.0055 | 0.562409  | 0.0017 |
| 10923727 | ---        | 0.343873  | 0.8614 | 0.475840  | 0.1331 | 0.745529  | 0.0030 | 0.597926  | 0.0171 |
| 10923768 | Cyp20a1    | 0.199927  | 0.9659 | -0.390148 | 0.2511 | -0.415194 | 0.1117 | -0.713045 | 0.0029 |
| 10923835 | Nrp2       | 0.003826  | 0.9999 | -0.846043 | 0.0065 | -1.056353 | 0.0003 | -1.263149 | 0.0000 |
| 10923877 | Adam23     | 0.195655  | 0.9589 | -0.255752 | 0.4243 | -0.542552 | 0.0077 | -0.286046 | 0.2217 |
| 10923940 | Ccny1l     | -0.232059 | 0.9942 | 0.553378  | 0.3508 | 0.829273  | 0.0427 | 0.400850  | 0.4363 |
| 10924015 | Map2       | -0.162288 | 0.7905 | -0.330816 | 0.0012 | -0.255670 | 0.0080 | -0.299528 | 0.0014 |
| 10924172 | ---        | -0.293433 | 0.9201 | -0.485060 | 0.1422 | -0.591558 | 0.0246 | -0.551896 | 0.0367 |
| 10924286 | Slc11a1    | 0.312718  | 0.9620 | -0.911018 | 0.0175 | -0.885092 | 0.0103 | -0.544311 | 0.1525 |
| 10924313 | Vil1       | -0.309954 | 0.7312 | -0.308610 | 0.1464 | -0.346846 | 0.0414 | -0.307161 | 0.0803 |
| 10924335 | Plcd4      | -0.187359 | 0.9010 | -0.366280 | 0.0451 | -0.221358 | 0.2083 | -0.321238 | 0.0464 |
| 10924672 | Acsl3      | -0.093088 | 0.9999 | 0.441195  | 0.1812 | 0.530236  | 0.0389 | 0.510339  | 0.0489 |
| 10925060 | Inpp5d     | -0.022082 | 0.9999 | -0.355655 | 0.1689 | -0.520733 | 0.0089 | -0.374715 | 0.0727 |
| 10925158 | Ugt1a5     | 0.209549  | 0.8570 | -0.456888 | 0.0034 | -0.433345 | 0.0028 | -0.322827 | 0.0273 |
| 10925264 | Sh3bp4     | -0.057987 | 0.9999 | 0.376082  | 0.1005 | 0.565178  | 0.0024 | 0.712296  | 0.0001 |
| 10925365 | Ramp1      | 0.149937  | 0.9968 | -0.599509 | 0.0604 | -0.634604 | 0.0201 | -0.739675 | 0.0053 |

|          |           |           |        |           |        |           |        |           |        |
|----------|-----------|-----------|--------|-----------|--------|-----------|--------|-----------|--------|
| 10925382 | Scly      | 0.127368  | 0.9624 | -0.263358 | 0.1662 | -0.367046 | 0.0124 | -0.353792 | 0.0155 |
| 10925695 | Pam       | -0.026680 | 0.9999 | 0.282913  | 0.1096 | 0.375523  | 0.0086 | 0.337943  | 0.0179 |
| 10925783 | Man2a1    | 0.036218  | 0.9999 | -0.176205 | 0.7926 | -0.459862 | 0.1351 | -0.654158 | 0.0228 |
| 10925839 | Ddx11     | -0.152777 | 0.9921 | -0.367052 | 0.2407 | -0.595756 | 0.0091 | -0.759702 | 0.0007 |
| 10926068 | Ppid      | -0.016419 | 0.9999 | 0.266211  | 0.2838 | 0.362575  | 0.0442 | 0.303504  | 0.1090 |
| 10926204 | Mocs1     | 0.026206  | 0.9999 | -0.292479 | 0.1767 | -0.512780 | 0.0020 | -0.336061 | 0.0490 |
| 10926245 | Trem2     | 0.433348  | 0.7200 | -0.721293 | 0.0019 | -0.895816 | 0.0001 | -0.966933 | 0.0000 |
| 10926388 | ---       | -0.165253 | 0.7341 | -0.113157 | 0.4284 | -0.242014 | 0.0076 | -0.206537 | 0.0234 |
| 10926453 | Ppp2r5d   | 0.057409  | 0.9999 | -0.247687 | 0.2838 | -0.262499 | 0.1368 | -0.340889 | 0.0421 |
| 10926503 | Yipf3     | -0.035925 | 0.9999 | 0.199058  | 0.2130 | 0.243944  | 0.0458 | 0.308723  | 0.0086 |
| 10926642 | Clic5     | -0.198620 | 0.9795 | 0.689852  | 0.0156 | 0.695989  | 0.0067 | 0.909569  | 0.0003 |
| 10926930 | Mcm3      | -0.003737 | 0.9999 | -0.117965 | 0.9023 | -0.562827 | 0.1171 | -0.889360 | 0.0074 |
| 10926958 | Gsta3     | -0.028123 | 0.9999 | -1.088222 | 0.0006 | -0.818995 | 0.0058 | -0.752767 | 0.0106 |
| 10926965 | Rpl10a    | -0.037920 | 0.9999 | -0.243290 | 0.0741 | -0.466810 | 0.0001 | -0.502929 | 0.0000 |
| 10926967 | LOC501110 | 0.478576  | 0.8973 | 0.346352  | 0.6472 | 0.841642  | 0.0342 | 0.811751  | 0.0423 |
| 10927179 | Phf3      | 0.202622  | 0.9630 | 0.174419  | 0.7322 | 0.493618  | 0.0422 | 0.263642  | 0.3709 |
| 10927209 | Znf622    | -0.025075 | 0.9999 | 0.179660  | 0.5770 | 0.379050  | 0.0378 | 0.277489  | 0.1631 |
| 10927230 | Bag2      | -0.136803 | 0.9959 | 0.555956  | 0.0499 | 0.704838  | 0.0036 | 0.481103  | 0.0552 |
| 10927233 | Zfp451    | 0.227537  | 0.9038 | 0.384095  | 0.1077 | 0.555796  | 0.0039 | 0.420925  | 0.0315 |
| 10927281 | Rps14     | -0.093323 | 0.9999 | -0.162943 | 0.7046 | -0.465849 | 0.0276 | -0.403683 | 0.0625 |
| 10927352 | Lman2l    | -0.005563 | 0.9999 | 0.296986  | 0.2322 | 0.371171  | 0.0476 | 0.505115  | 0.0048 |
| 10927413 | Actr1b    | -0.014819 | 0.9999 | 0.366095  | 0.0084 | 0.416098  | 0.0010 | 0.342660  | 0.0059 |
| 10927427 | Tmem131   | 0.179914  | 0.9620 | 0.234577  | 0.4496 | 0.554541  | 0.0042 | 0.490335  | 0.0106 |
| 10927538 | Rev1      | 0.121795  | 0.9990 | 0.079806  | 0.9065 | 0.540607  | 0.0252 | 0.161622  | 0.6453 |
| 10927588 | Lonrf2    | 0.100550  | 0.9985 | -0.316077 | 0.2240 | -0.412474 | 0.0350 | -0.422842 | 0.0295 |
| 10927639 | Creg2     | -0.025108 | 0.9999 | 0.148620  | 0.2879 | 0.090995  | 0.4758 | 0.319798  | 0.0009 |
| 10927680 | Tgfbra1   | 0.225622  | 0.8614 | 0.199390  | 0.4525 | 0.516489  | 0.0018 | 0.324288  | 0.0591 |
| 10927900 | Sdpr      | 0.115067  | 0.9999 | -0.485175 | 0.2366 | -0.677813 | 0.0260 | -0.782628 | 0.0082 |
| 10928030 | ---       | 0.027710  | 0.9999 | 0.157398  | 0.4230 | 0.272951  | 0.0316 | 0.150887  | 0.3170 |
| 10928084 | Ankrd44   | -0.069436 | 0.9999 | 0.254646  | 0.3588 | 0.393001  | 0.0381 | 0.260242  | 0.2237 |
| 10928229 | Clk1      | 0.123889  | 0.9998 | 0.212966  | 0.6871 | 0.538128  | 0.0443 | 0.379152  | 0.2012 |
| 10928275 | Fam126b   | 0.197030  | 0.9998 | 0.746746  | 0.1662 | 1.088242  | 0.0089 | 0.784331  | 0.0719 |
| 10928326 | ---       | -0.004036 | 0.9999 | 0.032055  | 0.8701 | 0.004433  | 0.9764 | 0.161432  | 0.0324 |
| 10928367 | Mpp4      | -0.293878 | 0.1518 | -0.235916 | 0.0199 | -0.164747 | 0.0831 | -0.148923 | 0.1319 |
| 10928475 | Ino80d    | 0.251982  | 0.8925 | 0.264890  | 0.3848 | 0.407092  | 0.0472 | 0.222760  | 0.3675 |
| 10928626 | Lanc11    | 0.113425  | 0.9653 | 0.327945  | 0.0393 | 0.461914  | 0.0008 | 0.427896  | 0.0014 |
| 10928684 | Bard1     | 0.141529  | 0.9999 | -0.793252 | 0.0489 | -0.808395 | 0.0201 | -1.200508 | 0.0004 |
| 10928855 | Tns1      | -0.051650 | 0.9999 | 0.445072  | 0.1810 | 0.548139  | 0.0338 | 0.621932  | 0.0136 |
| 10928902 | Tmbim1    | -0.092786 | 0.9999 | 0.972130  | 0.0001 | 1.189881  | 0.0000 | 1.441601  | 0.0000 |
| 10928940 | Znf142    | 0.126275  | 0.9942 | 0.430718  | 0.1037 | 0.594947  | 0.0056 | 0.557740  | 0.0086 |
| 10928963 | Prkag3    | -0.038930 | 0.9999 | 0.373320  | 0.1086 | 0.284430  | 0.1668 | 0.514486  | 0.0053 |
| 10929054 | RGD735175 | 0.309495  | 0.7803 | 0.262551  | 0.3133 | 0.368129  | 0.0468 | 0.489274  | 0.0057 |
| 10929161 | Dnpep     | -0.063060 | 0.9921 | 0.232022  | 0.0448 | 0.197996  | 0.0525 | 0.322528  | 0.0009 |
| 10929301 | Cul3      | 0.056899  | 0.9999 | 0.188250  | 0.4483 | 0.317331  | 0.0463 | 0.223102  | 0.2074 |
| 10929390 | Irs1      | 0.325412  | 0.8437 | -0.222720 | 0.5619 | -0.138618 | 0.6559 | -0.447098 | 0.0434 |
| 10929396 | Col4a4    | 0.269038  | 0.8578 | -0.355374 | 0.1362 | -0.303888 | 0.1330 | -0.425009 | 0.0251 |
| 10929491 | Trip12    | 0.107331  | 0.9620 | 0.145972  | 0.4126 | 0.291032  | 0.0113 | 0.240456  | 0.0399 |

|          |            |           |        |           |        |           |        |           |        |
|----------|------------|-----------|--------|-----------|--------|-----------|--------|-----------|--------|
| 10929713 | Hjrup      | 0.032558  | 0.9999 | -0.384588 | 0.5711 | -0.543281 | 0.1991 | -0.812951 | 0.0346 |
| 10929766 | Col6a3     | 0.093886  | 0.9999 | -0.792738 | 0.2755 | -1.412929 | 0.0062 | -1.849346 | 0.0003 |
| 10929817 | ---        | -0.222606 | 0.8063 | -0.327557 | 0.0448 | -0.318197 | 0.0251 | -0.254657 | 0.0866 |
| 10929929 | Myeov2     | -0.117913 | 0.9819 | -0.114367 | 0.7370 | -0.376850 | 0.0177 | -0.108833 | 0.6373 |
| 10929995 | Pask       | -0.099292 | 0.9942 | -0.344688 | 0.0958 | -0.384820 | 0.0248 | -0.341889 | 0.0500 |
| 10930076 | Dtymk      | 0.070021  | 0.9999 | -0.212247 | 0.4111 | -0.318263 | 0.0645 | -0.443077 | 0.0067 |
| 10930201 | ---        | 0.105086  | 0.9990 | 0.495656  | 0.0368 | 0.434903  | 0.0384 | 0.576510  | 0.0042 |
| 10930259 | Rab31      | -0.065003 | 0.9999 | -0.500750 | 0.0156 | -0.469888 | 0.0120 | -0.595732 | 0.0011 |
| 10930301 | Twsg1      | 0.198708  | 0.9333 | 0.486487  | 0.0210 | 0.479863  | 0.0110 | 0.556209  | 0.0024 |
| 10930307 | Ndufv2     | -0.097663 | 0.9977 | -0.247513 | 0.3660 | -0.254577 | 0.2158 | -0.375217 | 0.0456 |
| 10930385 | Arhgap28   | -0.041460 | 0.9999 | -0.100266 | 0.8977 | -0.427074 | 0.1588 | -0.620677 | 0.0270 |
| 10930488 | Ndc80      | 0.243134  | 0.9999 | -0.983506 | 0.2407 | -1.278070 | 0.0410 | -1.911805 | 0.0014 |
| 10930510 | Tyms       | -0.061906 | 0.9999 | -0.440647 | 0.0310 | -0.125450 | 0.6152 | -0.535523 | 0.0021 |
| 10930749 | 10-Sep     | -0.060874 | 0.9999 | -0.511967 | 0.0624 | -0.559701 | 0.0165 | -0.711262 | 0.0017 |
| 10931047 | LOC363331  | 0.094825  | 0.9867 | -0.075485 | 0.8144 | -0.193710 | 0.1882 | -0.320630 | 0.0156 |
| 10931081 | ---        | 0.031479  | 0.9999 | -0.057489 | 0.8546 | -0.257070 | 0.0380 | -0.075266 | 0.6835 |
| 10931159 | Tmem37     | 0.096142  | 0.9999 | -0.665925 | 0.0055 | -0.594857 | 0.0070 | -0.572055 | 0.0086 |
| 10931247 | Metrl1     | -0.122267 | 0.9999 | -0.400549 | 0.5318 | -0.605138 | 0.1287 | -0.784303 | 0.0385 |
| 10931457 | Uhrf1      | 0.065006  | 0.9999 | -0.657288 | 0.1472 | -0.941607 | 0.0080 | -1.385407 | 0.0001 |
| 10931477 | Tnfaip8l1  | -0.173021 | 0.9843 | -0.426350 | 0.1599 | -0.820225 | 0.0005 | -0.619559 | 0.0075 |
| 10931498 | Chaf1a     | 0.105525  | 0.9999 | -0.187938 | 0.7242 | -0.361159 | 0.1968 | -0.667165 | 0.0069 |
| 10931558 | Efcab1     | -0.092076 | 0.9873 | -0.328190 | 0.0278 | -0.332767 | 0.0115 | -0.260196 | 0.0557 |
| 10931780 | Pif1       | -0.113194 | 0.9936 | -0.383090 | 0.1032 | -0.500436 | 0.0088 | -0.436936 | 0.0227 |
| 10932269 | ---        | -0.061357 | 0.9999 | -0.082561 | 0.8255 | -0.327370 | 0.0345 | -0.302874 | 0.0542 |
| 10932279 | Med14      | 0.028909  | 0.9999 | 0.340684  | 0.3224 | 0.528756  | 0.0281 | 0.540273  | 0.0234 |
| 10932310 | ---        | 0.060298  | 0.9999 | 0.043238  | 0.9553 | 0.527789  | 0.0196 | 0.345265  | 0.1666 |
| 10932351 | Srpx       | 0.247182  | 0.9819 | -0.437443 | 0.3761 | -0.755965 | 0.0223 | -0.886063 | 0.0058 |
| 10932422 | Rbm3       | 0.058443  | 0.9999 | -0.755647 | 0.0055 | -0.814532 | 0.0012 | -0.891003 | 0.0003 |
| 10932437 | Was        | -0.162904 | 0.8614 | -0.239446 | 0.1075 | -0.335679 | 0.0052 | -0.329217 | 0.0053 |
| 10932453 | Suv39h1    | -0.200883 | 0.9223 | -0.308235 | 0.1930 | -0.416993 | 0.0211 | -0.441390 | 0.0129 |
| 10932459 | Glod5      | 0.113649  | 0.9999 | -0.577110 | 0.1814 | -0.775998 | 0.0195 | -0.914275 | 0.0046 |
| 10932557 | ---        | -0.179156 | 0.9620 | -0.009167 | 0.9906 | 0.287333  | 0.1747 | 0.391157  | 0.0488 |
| 10932642 | Pcbp2      | 0.128880  | 0.8614 | 0.141313  | 0.2888 | 0.167340  | 0.0912 | 0.218077  | 0.0207 |
| 10932795 | Acsl4      | -0.113339 | 0.9999 | 0.447691  | 0.1766 | 0.694373  | 0.0061 | 0.647106  | 0.0099 |
| 10932904 | ---        | 0.113623  | 0.9921 | 0.383766  | 0.0631 | 0.400418  | 0.0232 | 0.301026  | 0.1081 |
| 10932917 | Pfkfb1     | -0.150170 | 0.8872 | -0.215404 | 0.1579 | -0.278267 | 0.0200 | -0.204449 | 0.1085 |
| 10933042 | LOC501546  | 0.221964  | 0.8872 | 0.201522  | 0.4850 | 0.400642  | 0.0231 | 0.357647  | 0.0456 |
| 10933186 | RGD1560601 | 0.035366  | 0.9999 | 0.136052  | 0.7808 | 0.481515  | 0.0246 | 0.324624  | 0.1684 |
| 10933507 | Reps2      | -0.066990 | 0.9999 | -0.229067 | 0.4155 | -0.430631 | 0.0177 | -0.383538 | 0.0366 |
| 10933538 | ---        | 0.112153  | 0.9999 | 0.475099  | 0.2648 | 0.713593  | 0.0204 | 0.615175  | 0.0503 |
| 10933576 | ---        | 0.193831  | 0.9867 | 0.252617  | 0.6265 | 0.299381  | 0.3679 | 0.621731  | 0.0239 |
| 10933699 | Prdx4      | 0.071635  | 0.9999 | -0.201038 | 0.4981 | -0.361868 | 0.0464 | -0.435457 | 0.0133 |
| 10933780 | Sts        | 0.074568  | 0.9999 | 0.283076  | 0.1726 | 0.159818  | 0.4238 | 0.414689  | 0.0082 |
| 10933949 | ---        | -0.047248 | 0.9999 | 0.484711  | 0.4828 | 0.440174  | 0.3919 | 0.972710  | 0.0199 |
| 10933957 | Rpl32      | -0.011310 | 0.9999 | -0.125837 | 0.6414 | -0.286173 | 0.0458 | -0.307120 | 0.0299 |
| 10934042 | ---        | -0.100896 | 0.8628 | -0.173646 | 0.0491 | -0.094361 | 0.2838 | -0.092769 | 0.3044 |
| 10934173 | Efnb1      | 0.011970  | 0.9999 | -0.500167 | 0.0064 | -0.623287 | 0.0003 | -0.425195 | 0.0108 |

|          |            |           |        |           |        |           |        |           |        |
|----------|------------|-----------|--------|-----------|--------|-----------|--------|-----------|--------|
| 10934239 | Kif4       | 0.097733  | 0.9999 | -0.930572 | 0.1901 | -0.871555 | 0.1309 | -1.704241 | 0.0012 |
| 10934312 | Foxo4      | 0.213188  | 0.9589 | 0.427770  | 0.1246 | 0.452224  | 0.0474 | 0.234523  | 0.4032 |
| 10934445 | Ogt        | 0.222359  | 0.9630 | 0.520373  | 0.1037 | 0.832301  | 0.0013 | 0.550194  | 0.0375 |
| 10934500 | Rps26      | -0.044460 | 0.9999 | -0.167797 | 0.2590 | -0.123117 | 0.3337 | -0.220413 | 0.0440 |
| 10934577 | Gpbp111    | 0.074244  | 0.9999 | 0.335841  | 0.2196 | 0.497436  | 0.0145 | 0.370401  | 0.0844 |
| 10934608 | ---        | 0.253475  | 0.9507 | -0.538068 | 0.0730 | -0.404925 | 0.1321 | -0.506726 | 0.0496 |
| 10934637 | RGD1560455 | 0.429124  | 0.8832 | -0.640492 | 0.1267 | -0.800535 | 0.0173 | -0.610948 | 0.0840 |
| 10934807 | RGD1563104 | -0.150935 | 0.8541 | -0.136196 | 0.3751 | -0.216513 | 0.0366 | -0.203296 | 0.0532 |
| 10934855 | Tnmd       | -0.034251 | 0.9999 | 0.034841  | 0.8641 | 0.000441  | 0.9977 | 0.171172  | 0.0304 |
| 10934891 | Cenpi      | -0.019140 | 0.9999 | -0.645406 | 0.1185 | -0.705053 | 0.0370 | -0.888198 | 0.0065 |
| 10934940 | Rpl36a     | -0.061970 | 0.9999 | -0.196630 | 0.6243 | -0.486280 | 0.0236 | -0.402603 | 0.0700 |
| 10934994 | ---        | -0.195816 | 0.7989 | -0.132761 | 0.5077 | -0.296299 | 0.0126 | -0.216260 | 0.0855 |
| 10935023 | Gprasp2    | 0.061286  | 0.9999 | 0.503700  | 0.1027 | 0.565995  | 0.0260 | 0.448027  | 0.0935 |
| 10935041 | LOC680319  | -0.315465 | 0.9632 | -0.479419 | 0.4105 | -0.798232 | 0.0369 | -1.019798 | 0.0056 |
| 10935125 | Mum111     | -0.162205 | 0.9653 | -0.604588 | 0.0048 | -0.764670 | 0.0001 | -0.792202 | 0.0001 |
| 10935215 | Mid2       | -0.124336 | 0.9998 | 0.317982  | 0.4358 | 0.652114  | 0.0115 | 0.345939  | 0.2503 |
| 10935229 | ---        | -0.126046 | 0.9999 | 0.326420  | 0.6243 | 0.802796  | 0.0244 | 0.460186  | 0.2671 |
| 10935234 | Vsig1      | -0.205813 | 0.4739 | -0.179642 | 0.0853 | -0.171153 | 0.0543 | -0.202441 | 0.0190 |
| 10935260 | ---        | 0.024119  | 0.9999 | 0.236685  | 0.1363 | 0.065323  | 0.7340 | 0.262452  | 0.0408 |
| 10935338 | Bcor11     | 0.022898  | 0.9999 | 0.323099  | 0.1589 | 0.380442  | 0.0360 | 0.367861  | 0.0440 |
| 10935353 | Rab33a     | 0.068423  | 0.9990 | 0.548216  | 0.0002 | 0.497142  | 0.0004 | 0.488447  | 0.0004 |
| 10935356 | Slc25a14   | -0.002117 | 0.9999 | 0.260181  | 0.1517 | 0.390877  | 0.0056 | 0.308813  | 0.0310 |
| 10935782 | Tmem185a   | -0.240307 | 0.9525 | 0.552027  | 0.0489 | 0.595566  | 0.0131 | 0.561910  | 0.0191 |
| 10935928 | Rpl28      | 0.001833  | 0.9999 | -0.091417 | 0.6621 | -0.181647 | 0.1069 | -0.243910 | 0.0226 |
| 10936048 | G6pd       | -0.135428 | 0.9819 | 0.327149  | 0.1579 | 0.442102  | 0.0142 | 0.513075  | 0.0035 |
| 10936215 | Gria3      | 0.193035  | 0.9668 | 0.376030  | 0.2619 | 0.512388  | 0.0363 | 0.442314  | 0.0810 |
| 10936285 | Rnf113a1   | 0.132768  | 0.9867 | 0.350274  | 0.1392 | 0.401333  | 0.0347 | 0.304049  | 0.1364 |
| 10936377 | Dock11     | 0.119304  | 0.9990 | -0.362994 | 0.2899 | -0.381485 | 0.1458 | -0.537106 | 0.0283 |
| 10936478 | ---        | -0.042962 | 0.9921 | -0.066170 | 0.6062 | -0.014083 | 0.9146 | -0.148198 | 0.0356 |
| 10936480 | LOC499782  | -0.037477 | 0.9999 | -0.243880 | 0.2079 | -0.409077 | 0.0047 | -0.359710 | 0.0124 |
| 10936526 | Uxt        | -0.099686 | 0.9889 | -0.155646 | 0.5262 | -0.300317 | 0.0404 | -0.330477 | 0.0216 |
| 10936655 | Chst7      | 0.009357  | 0.9999 | -0.335829 | 0.2929 | -0.467550 | 0.0419 | -0.448467 | 0.0539 |
| 10936717 | Maoa       | -0.323228 | 0.9199 | 0.134147  | 0.8546 | 0.230896  | 0.5437 | 0.677940  | 0.0167 |
| 10936742 | Gpr34      | 0.084181  | 0.9494 | -0.169087 | 0.0913 | -0.207435 | 0.0118 | -0.139604 | 0.1165 |
| 10936753 | Ddx3x      | 0.108430  | 0.9921 | 0.338712  | 0.1171 | 0.636170  | 0.0003 | 0.441467  | 0.0101 |
| 10936775 | Usp9x      | 0.240363  | 0.9310 | 0.550911  | 0.0335 | 0.765753  | 0.0007 | 0.894236  | 0.0001 |
| 10936821 | Ube2q2l    | -0.118799 | 0.9921 | 0.329333  | 0.1576 | 0.396794  | 0.0308 | 0.289244  | 0.1463 |
| 10936899 | Cybb       | 0.692164  | 0.9063 | -1.460322 | 0.0301 | -1.785648 | 0.0024 | -2.060213 | 0.0004 |
| 10936993 | Pim2       | -0.196839 | 0.9310 | 0.148850  | 0.6918 | 0.297664  | 0.1343 | 0.394616  | 0.0359 |
| 10937241 | Crip2      | 0.020253  | 0.9999 | 0.327700  | 0.1812 | 0.257000  | 0.2234 | 0.379723  | 0.0484 |
| 10937356 | Rps26      | -0.052227 | 0.9999 | -0.196077 | 0.2170 | -0.142533 | 0.3055 | -0.246673 | 0.0409 |
| 10937403 | Col4a5     | 0.063165  | 0.9999 | 0.388427  | 0.0513 | 0.452401  | 0.0079 | 0.326171  | 0.0665 |
| 10937453 | RGD1562962 | 0.150100  | 0.8562 | 0.238841  | 0.0489 | -0.021789 | 0.9112 | 0.202851  | 0.0595 |
| 10937464 | Ubqln2     | 0.122979  | 0.9653 | 0.239855  | 0.2433 | 0.224135  | 0.1725 | 0.381986  | 0.0099 |
| 10937521 | ---        | 0.073113  | 0.9999 | -0.222840 | 0.3785 | -0.394930 | 0.0190 | -0.460485 | 0.0049 |
| 10937594 | Pik3ca     | -0.151114 | 0.9653 | 0.735011  | 0.0002 | 0.932421  | 0.0000 | 0.802878  | 0.0000 |
| 10937624 | Mid1       | 0.100658  | 0.9999 | -0.352872 | 0.5320 | -0.350683 | 0.3816 | -0.725987 | 0.0284 |

|          |            |           |        |           |        |           |        |           |        |
|----------|------------|-----------|--------|-----------|--------|-----------|--------|-----------|--------|
| 10937641 | ---        | -0.137048 | 0.9977 | -0.425655 | 0.2244 | -0.458086 | 0.0929 | -0.644984 | 0.0119 |
| 10937666 | Gpm6b      | 0.257714  | 0.9570 | -0.524825 | 0.1086 | -0.801490 | 0.0024 | -1.013281 | 0.0001 |
| 10937678 | Gemin8     | 0.073846  | 0.9999 | -0.228376 | 0.6000 | -0.170334 | 0.6050 | -0.494973 | 0.0411 |
| 10937725 | Figf       | 0.810788  | 0.7200 | -2.323209 | 0.0000 | -2.428104 | 0.0000 | -2.425450 | 0.0000 |
| 10937903 | Gpr64      | 0.023702  | 0.9999 | 0.376495  | 0.0012 | 0.165919  | 0.1652 | -0.005706 | 0.9827 |
| 10937962 | Sh3kbp1    | 0.213671  | 0.9625 | -0.495458 | 0.1044 | -0.601655 | 0.0156 | -0.606270 | 0.0138 |
| 10938001 | Map7d2     | 0.132810  | 0.9921 | 0.365623  | 0.1567 | 0.444223  | 0.0289 | 0.330960  | 0.1292 |
| 10938048 | Taf51      | -0.031684 | 0.9999 | 0.100149  | 0.7602 | 0.219741  | 0.1691 | 0.329890  | 0.0248 |
| 10938217 | ---        | -0.024935 | 0.9999 | -0.198916 | 0.4564 | -0.196490 | 0.3167 | -0.373669 | 0.0253 |
| 10938219 | Gk         | -0.376648 | 0.8669 | 0.585097  | 0.0918 | 0.769679  | 0.0068 | 0.592988  | 0.0418 |
| 10938346 | Pola1      | 0.058120  | 0.9999 | -0.163404 | 0.7069 | -0.270189 | 0.2642 | -0.526760 | 0.0111 |
| 10938540 | Eda2r      | -0.189431 | 0.9972 | 0.316481  | 0.6370 | 0.770483  | 0.0296 | 0.735688  | 0.0387 |
| 10938550 | Ophn1      | -0.062305 | 0.9999 | 0.369218  | 0.5058 | 0.775647  | 0.0194 | 0.660313  | 0.0520 |
| 10938712 | ---        | -0.231048 | 0.9401 | -0.158299 | 0.7403 | -0.211777 | 0.4500 | -0.476896 | 0.0327 |
| 10938719 | Ercc6l     | 0.023584  | 0.9999 | -0.314772 | 0.3714 | -0.525803 | 0.0267 | -0.625196 | 0.0065 |
| 10938729 | Cited1     | -0.455671 | 0.7989 | -0.669808 | 0.0332 | -0.726292 | 0.0082 | -0.953599 | 0.0004 |
| 10938874 | Zdhhc15    | 0.118670  | 0.9999 | -0.130512 | 0.8592 | -0.692973 | 0.0149 | -0.613108 | 0.0330 |
| 10938952 | Taf9b      | -0.043651 | 0.9999 | -0.355823 | 0.3133 | -0.539400 | 0.0297 | -0.478663 | 0.0592 |
| 10939002 | RGD1566265 | 0.070870  | 0.9999 | 0.386151  | 0.3415 | 0.608390  | 0.0296 | 0.552714  | 0.0522 |
| 10939018 | Brwd3      | 0.156207  | 0.9883 | 0.260236  | 0.4827 | 0.524427  | 0.0203 | 0.267722  | 0.3233 |
| 10939226 | Pcdh19     | 0.165952  | 0.9899 | -0.985712 | 0.0001 | -1.260967 | 0.0000 | -1.239914 | 0.0000 |
| 10939242 | Syt4       | -0.098519 | 0.9998 | 0.554937  | 0.0147 | 0.340764  | 0.1184 | 0.363394  | 0.0972 |
| 10939480 | Morc4      | 0.146237  | 0.9921 | -0.120444 | 0.8232 | -0.319834 | 0.1865 | -0.499598 | 0.0231 |
| 10939570 | Zdhhc9     | -0.214565 | 0.7989 | 0.244992  | 0.1403 | 0.248244  | 0.0668 | 0.390920  | 0.0021 |
| 10939634 | Gpr119     | -0.235079 | 0.7409 | -0.219833 | 0.2124 | -0.300617 | 0.0240 | -0.228523 | 0.1054 |
| 10939725 | Hs6st2     | 0.382967  | 0.7200 | -0.556925 | 0.0075 | -0.572011 | 0.0027 | -0.486915 | 0.0099 |
| 10939744 | Gpc4       | 0.299928  | 0.9620 | -0.390458 | 0.4484 | -0.673310 | 0.0408 | -0.658472 | 0.0468 |
| 10939764 | Gpc3       | 0.442382  | 0.8614 | -0.898305 | 0.0131 | -1.061707 | 0.0011 | -1.261994 | 0.0001 |
| 10939791 | ---        | -0.082390 | 0.9615 | -0.124739 | 0.3196 | -0.174637 | 0.0492 | -0.132175 | 0.1710 |
| 10939866 | Arhgef6    | -0.172474 | 0.9653 | 0.645552  | 0.0045 | 0.563213  | 0.0073 | 0.534972  | 0.0100 |
| 10939890 | Rbmx       | -0.059346 | 0.9999 | -0.513125 | 0.0275 | -0.415632 | 0.0484 | -0.596944 | 0.0028 |
| 10940058 | Usp12      | 0.058906  | 0.9999 | 0.272519  | 0.3094 | 0.448033  | 0.0167 | 0.278578  | 0.1830 |
| 10940085 | Prrg3      | 0.006315  | 0.9999 | -0.149945 | 0.5457 | -0.357364 | 0.0120 | -0.120641 | 0.5314 |
| 10940131 | Haus7      | -0.065676 | 0.9999 | -0.582308 | 0.0385 | -0.701742 | 0.0039 | -0.818814 | 0.0006 |
| 10940364 | Gdi1       | -0.048270 | 0.9999 | 0.241257  | 0.3784 | 0.240507  | 0.2430 | 0.383070  | 0.0373 |
| 10940380 | Atp6ap1    | -0.004670 | 0.9999 | 0.112253  | 0.5385 | 0.136450  | 0.2602 | 0.319437  | 0.0018 |
| 10940429 | Gprasp1    | 0.070481  | 0.9999 | 0.462444  | 0.0080 | 0.699564  | 0.0000 | 0.518584  | 0.0009 |
| 10940440 | ---        | -0.084960 | 0.9620 | 0.071429  | 0.7013 | 0.010442  | 0.9536 | 0.218859  | 0.0155 |
| 10940455 | ---        | -0.425894 | 0.9734 | 2.019460  | 0.0005 | 2.379593  | 0.0000 | 2.189475  | 0.0001 |
| 10940486 | ---        | 0.145280  | 0.9729 | 0.402164  | 0.0654 | 0.687451  | 0.0002 | 0.733038  | 0.0001 |
| 10940487 | ---        | -0.054066 | 0.9978 | 0.176414  | 0.1936 | 0.225419  | 0.0304 | 0.260797  | 0.0101 |
| 10940507 | ---        | 0.103807  | 0.9830 | 0.138264  | 0.5873 | 0.060664  | 0.7907 | 0.288517  | 0.0449 |
| 10940516 | ---        | 0.025245  | 0.9999 | -0.602216 | 0.0153 | -0.813623 | 0.0003 | -0.710538 | 0.0011 |
| 10940524 | ---        | -0.035042 | 0.9999 | 0.373004  | 0.0504 | 0.516622  | 0.0015 | 0.424115  | 0.0084 |
| 10940527 | ---        | -0.184732 | 0.9776 | 1.103202  | 0.0000 | 1.196915  | 0.0000 | 1.231857  | 0.0000 |
| 10940529 | ---        | -0.038879 | 0.9999 | -0.233341 | 0.3858 | -0.368672 | 0.0408 | -0.298379 | 0.1178 |
| 10940533 | ---        | 0.019930  | 0.9999 | -0.171602 | 0.3948 | -0.191528 | 0.1875 | -0.287294 | 0.0306 |



|          |     |           |        |           |        |           |        |           |        |
|----------|-----|-----------|--------|-----------|--------|-----------|--------|-----------|--------|
| 10940534 | --- | 0.005338  | 0.9999 | 0.388519  | 0.0696 | 0.293360  | 0.1273 | 0.478850  | 0.0067 |
| 10940536 | --- | -0.055266 | 0.9999 | 0.114119  | 0.6466 | 0.265383  | 0.0429 | 0.183462  | 0.2105 |
| 10940541 | --- | -0.063222 | 0.9999 | 0.235294  | 0.4042 | 0.397784  | 0.0317 | 0.209557  | 0.3487 |
| 10940545 | --- | 0.298524  | 0.9570 | -0.750705 | 0.0325 | -0.943452 | 0.0021 | -1.019305 | 0.0007 |
| 10940549 | --- | 0.319920  | 0.9199 | -0.639209 | 0.0523 | -0.746421 | 0.0080 | -0.555526 | 0.0564 |
| 10940557 | --- | -0.112663 | 0.9999 | 0.297669  | 0.4837 | 0.429695  | 0.1158 | 0.534284  | 0.0421 |
| 10940562 | --- | 0.022675  | 0.9999 | -0.405422 | 0.0793 | -0.516704 | 0.0070 | -0.438917 | 0.0228 |
| 10940565 | --- | 0.117917  | 0.9945 | 0.421118  | 0.0909 | 0.580668  | 0.0044 | 0.602725  | 0.0025 |
| 10940578 | --- | 0.115146  | 0.9814 | 0.443382  | 0.0069 | 0.695472  | 0.0000 | 0.803434  | 0.0000 |
| 10940585 | --- | 0.275940  | 0.9444 | -0.646305 | 0.0351 | -1.132185 | 0.0000 | -1.229848 | 0.0000 |
| 10940589 | --- | -0.069656 | 0.9978 | -0.198941 | 0.2848 | -0.279768 | 0.0373 | -0.279663 | 0.0371 |
| 10940591 | --- | 0.016660  | 0.9999 | -0.119498 | 0.3971 | -0.097962 | 0.3831 | -0.215208 | 0.0190 |
| 10940594 | --- | 0.277351  | 0.8437 | -0.517780 | 0.0095 | -0.668484 | 0.0003 | -0.506236 | 0.0044 |
| 10940598 | --- | -0.135149 | 0.9539 | 0.250803  | 0.1464 | 0.311808  | 0.0228 | 0.327386  | 0.0152 |
| 10940611 | --- | -0.068191 | 0.9977 | -0.696143 | 0.0000 | -0.665015 | 0.0000 | -0.734552 | 0.0000 |
| 10940620 | --- | 0.025431  | 0.9999 | -0.273103 | 0.2051 | -0.403295 | 0.0127 | -0.485306 | 0.0021 |
| 10940626 | --- | 0.101279  | 0.9968 | -0.238707 | 0.3918 | -0.238997 | 0.2505 | -0.480233 | 0.0073 |
| 10940632 | --- | 0.482296  | 0.8614 | -0.757846 | 0.0746 | -0.625192 | 0.0946 | -0.883624 | 0.0120 |
| 10940637 | --- | 0.146853  | 0.8945 | 0.264568  | 0.0565 | 0.387209  | 0.0010 | 0.304040  | 0.0091 |
| 10940644 | --- | 0.051430  | 0.9999 | 0.268727  | 0.3137 | 0.491187  | 0.0079 | 0.535350  | 0.0030 |
| 10940654 | --- | 0.531478  | 0.9582 | -0.590906 | 0.5343 | -1.264196 | 0.0232 | -0.641780 | 0.3403 |
| 10940666 | --- | 0.128296  | 0.9999 | -0.481644 | 0.2684 | -0.568227 | 0.0808 | -0.997484 | 0.0010 |
| 10940676 | --- | 0.233466  | 0.7375 | -0.299695 | 0.0458 | -0.287715 | 0.0279 | -0.322684 | 0.0114 |
| 10940677 | --- | 0.293857  | 0.7989 | -0.713467 | 0.0002 | -0.851834 | 0.0000 | -0.701472 | 0.0001 |
| 10940686 | --- | -0.000304 | 0.9999 | -0.163421 | 0.3787 | -0.257774 | 0.0392 | -0.158850 | 0.2718 |
